# Supplementary material for: Triple aryne–tetrazine reaction enabling rapid access to a new class of polyaromatic heterocycles
Source: Royal Society of Chemistry journal article supplement (doi:10.1039/c5sc01726b), 2015-01-01
Supplement: c5sc01726b1.pdf [file c5sc01726b1.pdf]

# Triple Aryne-Tetrazine Reaction Enabling Rapid Access to a New Class of Polyaromatic Heterocycles

Sung-Eun Suh, Stephanie A. Barros, and David M. Chenoweth\*

*Department of Chemistry, University of Pennsylvania, 231 34th Street,  
Philadelphia, Pennsylvania 19104-6323, United States*

## Table of content

|                                            |             |
|--------------------------------------------|-------------|
| General information .....                  | S02         |
| Additional optimization information .....  | S03 – S04   |
| Real-time temperature study.....           | S05         |
| Experimental procedures .....              | S06 – S37   |
| References .....                           | S38         |
| NMR spectra .....                          | S39 – S114  |
| UV/Vis and fluorescence spectra .....      | S115 – S121 |
| Crystal data and structure refinement..... | S122 – S123 |

## General information

**Materials.** All commercial reagents and solvents were used as received. Zinc trifluoromethanesulfonate, hydrazine anhydrous, propionitrile, decanenitrile, 2-thiophenecarbonitrile, 2-pyridinecarbonitrile, 2-fluorobenzonitrile, adamantane-1-carbonitrile, 4-(aminomethyl)benzonitrile hydrochloride, di-*tert*-butyl dicarbonate and 1.0M tetrabutylammonium fluoride in THF were purchased from Aldrich. Acetonitrile and benzonitrile were purchased from Fisher Scientific, 4-bromobenzonitrile from Oakwood Products Inc, 3-(Trimethylsilyl)-2-naphthyl trifluoromethanesulfonate from TCI and methylene chloride- $d_2$  and chloroform- $d$  from Cambridge Isotope Laboratories Inc. Flash column chromatography was performed using Silicycle silica gel (55–65 Å pore diameter). Thin-layer chromatography was performed on Sorbent Technologies silica plates (250  $\mu$ m thickness). Dulbecco's Modified Eagle Medium (DMEM) was purchased from Invitrogen. Fetal bovine serum (FBS) was purchased from Gibco, Life Technologies. L-glutamine and penicillin/streptomycin were purchased from Corning Cellgro.

**General spectroscopic methods.** Proton nuclear magnetic resonance spectroscopy ( $^1\text{H}$  NMR) and Carbon nuclear magnetic resonance spectroscopy ( $^{13}\text{C}$  NMR) spectra were recorded on a Bruker UNI 500 NMR. Fluorine nuclear magnetic resonance spectroscopy ( $^{19}\text{F}$  NMR) was recorded on a Bruker DMX 360 NMR. High-resolution mass spectra were obtained by Dr. Rakesh Kohli at the University of Pennsylvania's Mass Spectrometry Service Center on a Micromass AutoSpec electrospray/chemical ionization spectrometer. X-ray diffraction data obtained and solved by Dr. Patrick Carroll at the University of Pennsylvania. Ultraviolet absorption spectrophotometry was performed on a JASCO V-650 spectrophotometer with a PAC-743R multichannel Peltier using quartz cells with a 1 cm cell path length. High performance liquid chromatography analysis was performed using a Jasco HPLC instrument equipped with a Phenomenex column (Luna 5u C18(2) 100A; 250  $\times$  4.60 mm, 5  $\mu$ m). Graph of time versus temperature was obtained using a Vernier Go-Link and temperature probe.

**Cell Culture and Imaging.** HeLa cells were maintained in a humidified incubator at 37 °C in 5%  $\text{CO}_2$ . HeLa cells were cultured in DMEM supplemented with 10% fetal bovine serum (Gibco, Life Technologies) and penicillin and streptomycin (Corning Cellgro). For live cell imaging, cells were plated in glass-bottom 35-mm dishes (MatTEK) 24 hours before experiments. 24 hours after plating, 1  $\mu$ L of compounds (stock solution 10 mM) was added to 2 mL of media. Cells were incubated for 2 hours with compounds at 37 °C followed by washing with fresh media 2 times. During imaging, cells were maintained in DMEM without phenol red supplemented with 10% FBS. A Leica TCS SP8 confocal microscope equipped with a 63x/1.4 NA oil immersion objective lens was used. Compound **5e** was excited at 405 nm and emission was observed from 450-500 nm. To observe MitoTracker Red FM, an excitation of wavelength of 552 nm was used and emission was observed from 575-640 nm. Hoechst 33342 was observed by excitation with 405 nm and emission from 408-450 nm. Images were processed using Fiji ImageJ.

### Additional optimization information

The yield was determined by HPLC and 9,10-diphenylanthracene was used as an internal standard.

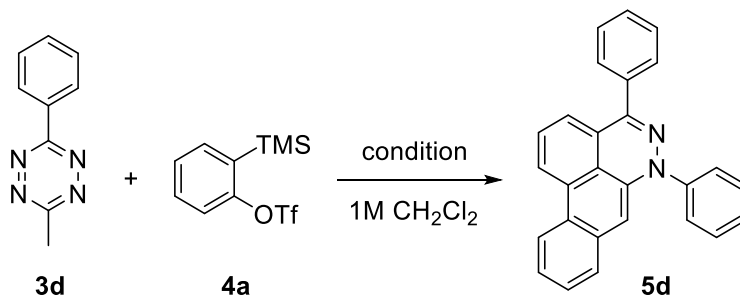

**Table S1. Effect of fluoride anion source and combination with additive.**

| Entry | F <sup>-</sup>    | Eq of F <sup>-</sup> | Eq of Benz. | Additive <sup>b</sup> | Temp (°C) | Time  | Yield (%) <sup>c</sup> |
|-------|-------------------|----------------------|-------------|-----------------------|-----------|-------|------------------------|
| 1     | TBAF <sup>a</sup> | 10                   | 11          | -                     | 24        | 1 h   | -                      |
| 2     | TBAF <sup>a</sup> | 10                   | 11          | TFA                   | 24        | 1 h   | -                      |
| 3     | TBAF <sup>a</sup> | 10                   | 11          | NEt <sub>3</sub>      | 24        | 1 h   | -                      |
| 4     | TBAF              | 11                   | 10          | -                     | 24        | 5 min | 26 (23 <sup>d</sup> )  |
| 5     | TBAT              | 11                   | 10          | -                     | 24        | 1 h   | -                      |
| 6     | TBAT              | 11                   | 10          | TFA                   | 24        | 1 h   | -                      |
| 7     | TBAT              | 11                   | 10          | NEt <sub>3</sub>      | 24        | 1 h   | -                      |
| 8     | CsF               | 11                   | 10          | -                     | 24        | 1 h   | -                      |
| 9     | CsF               | 11                   | 10          | TFA                   | 24        | 1 h   | -                      |
| 10    | CsF               | 11                   | 10          | NEt <sub>3</sub>      | 24        | 1 h   | -                      |
| 11    | HF                | 11                   | 10          | -                     | 24        | 1 h   | -                      |
| 12    | KF                | 11                   | 10          | -                     | 24        | 1 h   | -                      |
| 13    | KF                | 11                   | 10          | 18-crown-6            | 24        | 5 min | 3                      |

<sup>a</sup> 1 eq of TBAF was added to 1.1 eq of benzyne precursor and then 10 eq of stock solution from those mixture was added to tetrazine.

<sup>b</sup> 10 eq of additive was added.

<sup>c</sup> HPLC yield.

<sup>d</sup> Isolated yield.

**Table S2. Effect of additive without fluoride anion source.**

| Entry | F <sup>-</sup> | Eq of F <sup>-</sup> | Eq of Benz. | Additive <sup>a</sup>       | Temp (°C) | Time | Yield (%) <sup>b</sup> |
|-------|----------------|----------------------|-------------|-----------------------------|-----------|------|------------------------|
| 1     | -              | -                    | 10          | Indole                      | 24        | 1 h  | -                      |
| 2     | -              | -                    | 10          | Imidazole                   | 24        | 1 h  | -                      |
| 3     | -              | -                    | 10          | TMG                         | 24        | 1 h  | -                      |
| 4     | -              | -                    | 10          | DBU                         | 24        | 1 h  | -                      |
| 5     | -              | -                    | 10          | <i>t</i> -BuOK/THF          | 24        | 1 h  | -                      |
| 6     | -              | -                    | 10          | 2,6-lutidine                | 24        | 1 h  | -                      |
| 7     | -              | -                    | 10          | Pyridine                    | 24        | 1 h  | -                      |
| 8     | -              | -                    | 10          | <i>t</i> -BuNH <sub>2</sub> | 24        | 1 h  | -                      |
| 9     | -              | -                    | 10          | TBAOH                       | 24        | 1 h  | -                      |
| 10    | -              | -                    | 10          | TBABr                       | 24        | 1 h  | -                      |
| 11    | -              | -                    | 10          | TBACl                       | 24        | 1 h  | -                      |

<sup>a</sup> 10 eq of additive was added.<sup>b</sup> HPLC yield.**Table S3. Effect of equivalence of benzyne precursor and TBAF.**

| Entry | F <sup>-</sup> | Eq of F <sup>-</sup> | Eq of Benz. | Additive | Temp (°C) | Time  | Yield (%) <sup>a</sup> |
|-------|----------------|----------------------|-------------|----------|-----------|-------|------------------------|
| 1     | TBAF           | 11                   | 10          | -        | 24        | 5 min | 26                     |
| 2     | TBAF           | 11                   | 11          | -        | 24        | 5 min | 25                     |
| 3     | TBAF           | 8.8                  | 8           | -        | 24        | 5 min | 19                     |
| 4     | TBAF           | 6.6                  | 6           | -        | 24        | 5 min | 11                     |
| 5     | TBAF           | 4.4                  | 4           | -        | 24        | 5 min | 6                      |
| 6     | TBAF           | 2.2                  | 2           | -        | 24        | 5 min | 3                      |
| 7     | TBAF           | 1.1                  | 1           | -        | 24        | 5 min | 1                      |
| 8     | TBAF           | 9                    | 10          | -        | 24        | 5 min | 22                     |
| 9     | TBAF           | 7                    | 10          | -        | 24        | 5 min | 14                     |
| 10    | TBAF           | 11                   | 22          | -        | 24        | 5 min | 23                     |

<sup>a</sup> HPLC yield.**Table S4. Effect of temperature and reaction time.**

| Entry | F <sup>-</sup> | Eq of F <sup>-</sup> | Eq of Benz. | Additive | Temp (°C)            | Time              | Yield (%) <sup>a</sup> |
|-------|----------------|----------------------|-------------|----------|----------------------|-------------------|------------------------|
| 1     | TBAF           | 11                   | 10          | -        | 24                   | 5 min             | 26                     |
| 2     | TBAF           | 11                   | 10          | -        | 0                    | 5 min             | 6                      |
| 3     | TBAF           | 11                   | 10          | -        | 0 to 24 <sup>b</sup> | 35 min            | 7                      |
| 4     | TBAF           | 11                   | 10          | -        | 0 to 24 <sup>b</sup> | 65 min            | 10                     |
| 5     | TBAF           | 11                   | 10          | -        | 24                   | 65 min            | 13                     |
| 6     | TBAF           | 3.3                  | 3           | -        | 0                    | 24 h <sup>c</sup> | 27 <sup>d</sup>        |
| 7     | TBAF           | 3.3                  | 3           | -        | 24                   | 4 h <sup>e</sup>  | 5 <sup>d</sup>         |

<sup>a</sup> HPLC yield except entry 6.<sup>b</sup> TBAF was added dropwise for 5 min at 0 °C and then the reaction mixture was warmed to 24 °C for additional time.<sup>c</sup> TBAF was added in period of 4 h at 0 °C and then was stirred for additional 20 h.<sup>d</sup> Isolated yield based on the benzyne precursor as the starting material.<sup>e</sup> TBAF was added in period of 4 h at 24 °C.



### Real-time temperature study

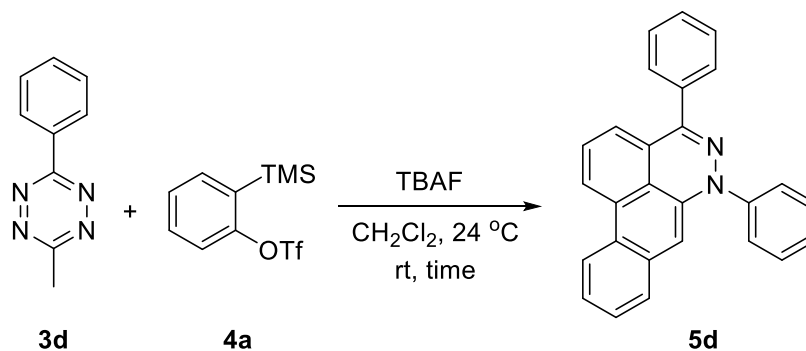

A vial was charged with 14.8 mg (0.086 mmol) of **3d** and 300 mg (0.86 mmol) of 3-(trimethylsilyl)-2-naphthyl trifluoromethanesulfonate in 0.09 mL of dichloromethane at 24 °C, and 1 M TBAF in THF (0.95 mL, 0.95 mmol) was slowly added to the solution over the course of 1 min (0 to 60 sec in Supplementary Figure 1). The highest temperature was 52 °C at 73 sec.

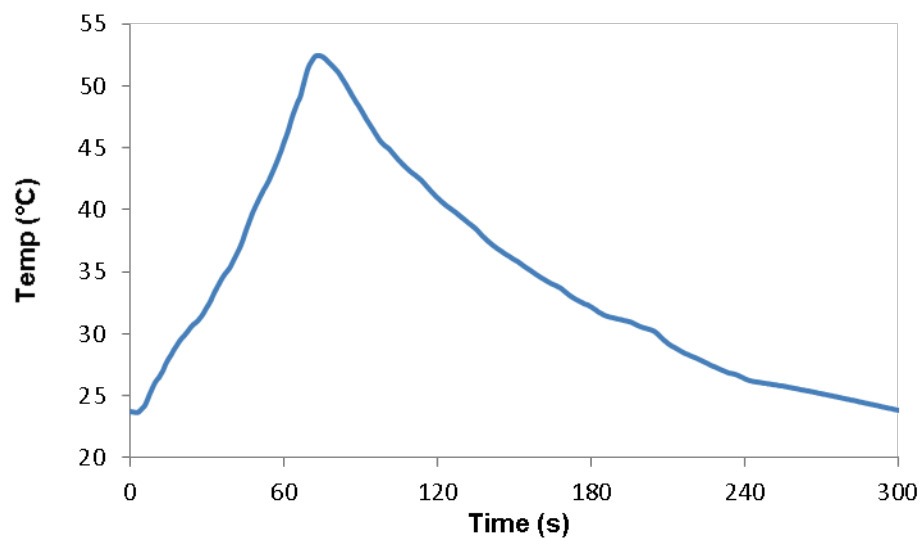

**Figure S1.** Graph of time vs. temperature of the reaction.

## Experimental procedures

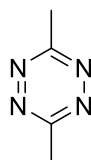

**3a**

**3,6-dimethyl-1,2,4,5-tetrazine (3a):** **3a** was prepared according to the previously published procedure<sup>1</sup> from commercially available acetonitrile. The product was purified by flash column chromatography (ethyl acetate/hexane 1:4) to afford **3a**. The data for this compound was previously reported in the literature.<sup>2-4</sup>

**Physical Property:** Red crystal.

**Isolated Yield:** 30%

**TLC:**  $R_f$  = 0.29 (silica gel, ethyl acetate/hexane 1:4).

**<sup>1</sup>H NMR** (500 MHz, CDCl<sub>3</sub>)  $\delta$  2.96 (s, 6H).

**<sup>13</sup>C NMR** (125 MHz, CDCl<sub>3</sub>)  $\delta$  167.2, 21.0

**IR** (neat): 1636, 1412, 1350, 1292, 1270, 913, 873, and 734 cm<sup>-1</sup>.

**HRMS** (ESI) calculated for C<sub>4</sub>H<sub>7</sub>N<sub>4</sub> [M+H]<sup>+</sup> 111.0660, no peak matched the calculated exact mass.<sup>5</sup>

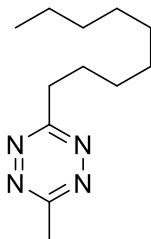

**3b**

**3-methyl-6-nonyl-1,2,4,5-tetrazine (3b):** **3b** was prepared according to the previously published procedure<sup>1</sup> from commercially available acetonitrile and decanenitrile. The product was purified by flash column chromatography (ethyl acetate/hexane 1:16) to afford **3b**.

**Physical Property:** Purple crystal, m.p. = 33-34 °C.

**Isolated Yield:** 19%

**TLC:**  $R_f$  = 0.50 (silica gel, ethyl acetate/hexane 1:4).

**<sup>1</sup>H NMR** (500 MHz, CDCl<sub>3</sub>)  $\delta$  3.27 (t, 2H, J = 7.7 Hz), 3.02 (s, 3H), 1.96-1.88 (m, 2H), 1.46-1.19 (m, 12H), 0.90-0.84 (m, 3H).

**<sup>13</sup>C NMR** (125 MHz, CDCl<sub>3</sub>)  $\delta$  170.3, 167.4, 34.9, 32.0, 29.5, 29.39, 29.37, 29.27, 28.5, 22.8, 21.2, 14.2.

**IR** (neat): 2953, 2914, 2848, 2870, 1718, 1653, 1469, 1407, 1338, 1317, 1274, 1200, 891, 774, and 720 cm<sup>-1</sup>.

**HRMS** (ESI) calculated for C<sub>12</sub>H<sub>23</sub>N<sub>4</sub> [M+H]<sup>+</sup> 223.1918, found 223.1922.

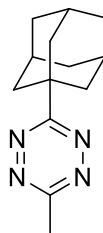

**3c**

**3-((3r,5r,7r)-adamantan-1-yl)-6-methyl-1,2,4,5-tetrazine (3c):** **3c** was prepared according to the previously published procedure<sup>1</sup> from commercially available acetonitrile and adamantane-1-carbonitrile. The product was purified by flash column chromatography (ethyl acetate/hexane 1:12) to afford **3c**.

**Physical Property:** Red solid, m.p. = 55-56 °C.

**Isolated Yield:** 22%

**TLC:**  $R_f$  = 0.37 (silica gel, ethyl acetate/hexane 1:4).

**<sup>1</sup>H NMR** (500 MHz, CDCl<sub>3</sub>)  $\delta$  2.90 (s, 3H), 2.10-2.00 (m, 9H), 1.71 (bs, 6H).

**<sup>13</sup>C NMR** (125 MHz, CDCl<sub>3</sub>)  $\delta$  174.3, 166.6, 40.5, 39.2, 36.3, 28.2, 21.0.

**IR** (neat): 2905, 2850, 1453, 1398, 1353, 1312, 1088, 1046, 890, 736 cm<sup>-1</sup>.

**HRMS** (ESI) calculated for C<sub>13</sub>H<sub>19</sub>N<sub>4</sub> [M+H]<sup>+</sup> 231.1605, found 231.1600.

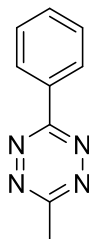

**3d**

**3-methyl-6-phenyl-1,2,4,5-tetrazine (3d):** **3d** was prepared according to the previously published procedure<sup>1</sup> from commercially available acetonitrile and benzonitrile. The product was purified by flash column chromatography (ethyl acetate/hexane 1:10) to afford **3d**. The data for this compound was previously reported in the literature.<sup>4,6</sup>

**Physical Property:** Purple crystal.

**Isolated Yield:** 58%

**TLC:**  $R_f$  = 0.42 (silica gel, 25% ethyl acetate/hexane).

**<sup>1</sup>H NMR** (500 MHz, CDCl<sub>3</sub>)  $\delta$  8.51-8.45 (m, 2H), 7.56-7.46 (m, 3H), 3.01 (s, 3H).

**<sup>13</sup>C NMR** (125 MHz, CDCl<sub>3</sub>)  $\delta$  167.1, 163.9, 132.4, 131.8, 129.1, 127.8, 21.1.

**IR** (neat): 1473, 1401, 1362, 1176, 1089, 1022, 890, 760, 722, 692, and 675 cm<sup>-1</sup>.

**HRMS** (ESI) calculated for C<sub>9</sub>H<sub>9</sub>N<sub>4</sub> [M+H]<sup>+</sup> 173.0822, found 173.0819.

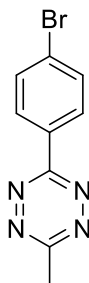

**3e**

**3-(4-bromophenyl)-6-methyl-1,2,4,5-tetrazine (3e):** **3e** was prepared according to the previously published procedure<sup>1</sup> from commercially available acetonitrile and 4-bromobenzonitrile. The product was purified by flash column chromatography (ethyl acetate/hexane 1:10) to afford **3e**.

**Physical Property:** Purple crystal, m.p. = 151-152 °C.

**Isolated Yield:** 16%

**TLC:**  $R_f$  = 0.53 (silica gel, ethyl acetate/hexane 1:4).

**<sup>1</sup>H NMR** (500 MHz, CDCl<sub>3</sub>)  $\delta$  8.43-8.38 (m, 2H), 7.70-7.66 (m, 2H), 3.07 (s, 3H)

**<sup>13</sup>C NMR** (125 MHz, CDCl<sub>3</sub>)  $\delta$  167.5, 163.6, 132.6, 130.8, 129.4, 127.7, 21.3.

**IR** (neat): 1588, 1402, 1366, 1174, 1091, 1072, 1008, 890, 847, 798, and 633 cm<sup>-1</sup>.

**HRMS** (ESI) calculated for C<sub>9</sub>H<sub>8</sub>BrN<sub>4</sub> [M+H]<sup>+</sup> 250.9922, no peak matched the calculated exact mass.

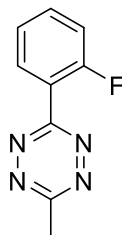

**3f**

**3-(2-fluorophenyl)-6-methyl-1,2,4,5-tetrazine (3f):** **3f** was prepared according to the previously published procedure<sup>1</sup> from commercially available acetonitrile and 2-fluorobenzonitrile. The product was purified by flash column chromatography (ethyl acetate/hexane 1:8) to afford **3f**.

**Physical Property:** Red solid, m.p. = 50-51 °C.

**Isolated Yield:** 26%

**TLC:**  $R_f$  = 0.44 (silica gel, ethyl acetate/hexane 1:4).

**<sup>1</sup>H NMR** (500 MHz, CDCl<sub>3</sub>)  $\delta$  8.18 (td, 1H,  $J$  = 7.6, 1.8 Hz), 7.59-7.53 (m, 1H), 7.33 (td, 1H,  $J$  = 7.6, 1.0 Hz), 7.26 (dd, 1H,  $J$  = 10.8, 1.0 Hz), 3.08 (s, 3H).

**<sup>13</sup>C NMR** (125 MHz, CDCl<sub>3</sub>)  $\delta$  166.8, 163.9, 162.3, 160.2, 133.9, 133.8, 131.3, 124.74, 124.71, 120.7, 120.6, 117.32, 117.15, 21.2.

**<sup>19</sup>F NMR** (338 MHz, CDCl<sub>3</sub>)  $\delta$  -112.8 to -112.9 (m, 1F).

**IR** (neat): 2129, 1614, 1586, 1497, 1466, 1400, 1364, 1253, 1216, 1114, 1087, 1028, 888, 821, 763, 736 cm<sup>-1</sup>.

**HRMS** (ESI) calculated for C<sub>9</sub>H<sub>8</sub>FN<sub>4</sub> [M+H]<sup>+</sup> 191.0729, no peak matched the calculated exact mass.

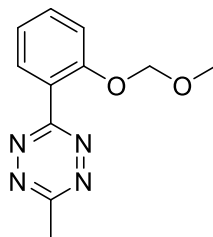

**3g**

**3-(2-(methoxymethoxy)phenyl)-6-methyl-1,2,4,5-tetrazine (3g):** A vial was charged with 80 mg (0.43 mmol) of **3n** and 0.44 mL (2.55 mmol) of *N,N*-diisopropylethylamine (DIPEA) in 1.00 mL of dichloromethane at 0 °C, and the solution was stirred for 20 min. To the resulting solution was added 0.01 mL (1.28 mmol) of chloromethylmethyl ether (MOMCl). After 20 min at 0 °C, the solution was warmed to 24 °C and stirred for another 12 h. The solution was quenched with saturated NH<sub>4</sub>Cl solution, extracted with dichloromethane, and purified by column chromatography (ethyl acetate/hexane 1:4) to afford **3g** (54.1 mg).

**Physical Property:** Red oil.

**Isolated Yield:** 55%

**TLC:** R<sub>f</sub> = 0.30 (silica gel, ethyl acetate/hexane 1:4).

**<sup>1</sup>H NMR** (500 MHz, CDCl<sub>3</sub>) δ 7.89 (dd, 1H, J = 7.7, 0.9 Hz), 7.53 (ddd, 1H, J = 8.4, 7.5, 1.7 Hz), 7.32 (d, 1H, J = 8.4 Hz), 7.20 (td, 1H, 7.5, 0.9 Hz), 5.23 (s, 2H), 3.47 (s, 3H), 3.10 (s, 3H).

**<sup>13</sup>C NMR** (125 MHz, CDCl<sub>3</sub>) δ 166.3, 165.9, 155.9, 132.9, 131.6, 123.3, 122.3, 116.1, 95.1, 56.4, 21.2.

**IR** (neat): 2923, 1603, 1496, 1461, 1399, 1154, 1080, 982, 756, 736 cm<sup>-1</sup>.

**HRMS** (ESI) calculated for C<sub>11</sub>H<sub>13</sub>N<sub>4</sub>O<sub>2</sub> [M+H]<sup>+</sup> 233.1034, found 233.1048.

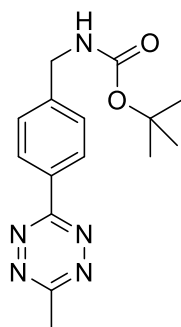

**3h**

**tert-butyl (4-(6-methyl-1,2,4,5-tetrazin-3-yl)benzyl)carbamate (3h):** **3h** was obtained according to the literature procedures and <sup>1</sup>H NMR was matched with the literature.<sup>1</sup>

**<sup>1</sup>H NMR** (500 MHz, CDCl<sub>3</sub>) δ 8.46 (d, 2H, J = 8.2 Hz), 7.44 (d, 2H, J = 8.2 Hz), 5.22 (bs, 1H), 4.38 (d, 2H, J = 5.7 Hz), 3.04 (s, 3H), 1.44 (s, 9H).



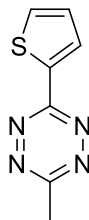

**3i**

**3-methyl-6-(thiophen-2-yl)-1,2,4,5-tetrazine (3i):** **3i** was prepared according to the previously published procedure<sup>1</sup> from commercially available acetonitrile and thiophene-2-carbonitrile. The product was purified by flash column chromatography (ethyl acetate/hexane 1:10) to afford **3i**.

**Physical Property:** Orange-red crystal, m.p. = 132-133 °C.

**Isolated Yield:** 27%

**TLC:**  $R_f$  = 0.46 (silica gel, ethyl acetate/hexane 1:10).

**<sup>1</sup>H NMR** (500 MHz, CDCl<sub>3</sub>)  $\delta$  8.19 (dd, 1H, J = 3.7, 0.8 Hz), 7.62 (dd, 1H, J = 5.0, 0.8 Hz), 7.21-7.18 (m, 1H), 3.00 (s, 3H).

**<sup>13</sup>C NMR** (125 MHz, CDCl<sub>3</sub>)  $\delta$  166.7, 162.0, 135.8, 132.3, 131.0, 128.9, 21.2.

**IR** (neat): 1535, 1437, 1394, 1370, 1346, 1294, 1216, 1082, 1054, 991, 897, 854, 732, and 670 cm<sup>-1</sup>.

**HRMS** (ESI) calculated for C<sub>7</sub>H<sub>7</sub>N<sub>4</sub>S [M+H]<sup>+</sup> 179.0386, found 179.0393.

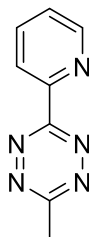

**3j**

**3-methyl-6-(pyridin-2-yl)-1,2,4,5-tetrazine (3j):** **3j** was prepared according to the previously published procedure<sup>1</sup> from commercially available acetonitrile and 2-cyanopyridine. The product was purified by flash column chromatography (ethyl acetate/hexane 1:1) to afford **3j**.

**Physical Property:** Purple crystal, m.p. = 104-105 °C.

**Isolated Yield:** 11%

**TLC:**  $R_f$  = 0.06 (silica gel, ethyl acetate/hexane 1:4).

**<sup>1</sup>H NMR** (500 MHz, CDCl<sub>3</sub>)  $\delta$  8.70 (dd, 1H,  $J$  = 4.7, 0.7 Hz), 8.38 (d, 1H,  $J$  = 7.9 Hz), 7.76 (td, 1H,  $J$  = 7.8, 1.7 Hz), 7.34 (ddd, 1H,  $J$  = 7.6, 4.7, 1.0 Hz), 2.93 (s, 3H).

**<sup>13</sup>C NMR** (125 MHz, CDCl<sub>3</sub>)  $\delta$  167.7, 163.2, 150.5, 149.9, 137.1, 126.0, 123.5, 21.0.

**IR** (neat): 1641, 1584, 1567, 1400, 1364, 1103, 1040, 992, 902, 778, 745, 736 cm<sup>-1</sup>.

**HRMS** (ESI) calculated for C<sub>8</sub>H<sub>8</sub>N<sub>5</sub> [M+H]<sup>+</sup> 174.0775, found 174.0783.

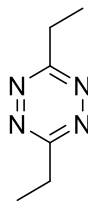

**3k**

**3,6-diethyl-1,2,4,5-tetrazine (3k):** **3k** was prepared according to the previously published procedure<sup>1</sup> from commercially available propionitrile. The product was purified by flash column chromatography (ethyl acetate/hexane 1:20) to afford **3k**.

**Physical Property:** Red oil.

**Isolated Yield:** 38%

**TLC:**  $R_f$  = 0.60 (silica gel, ethyl acetate/hexane 1:4).

**<sup>1</sup>H NMR** (500 MHz, CDCl<sub>3</sub>)  $\delta$  3.22 (q, 4H, J = 7.6 Hz), 1.40 (t, 6H, J = 7.6 Hz).

**<sup>13</sup>C NMR** (125 MHz, CDCl<sub>3</sub>)  $\delta$  170.8, 28.2, 12.2.

**IR** (neat): 2983, 2942, 2884, 1688, 1464, 1399, 1266, 1056, 888, 737, 701, 652 cm<sup>-1</sup>.

**HRMS** (ESI) calculated for C<sub>6</sub>H<sub>11</sub>N<sub>4</sub> [M+H]<sup>+</sup> 139.0973, no peak matched the calculated exact mass.

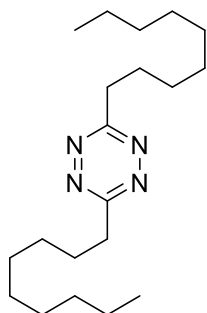

**3I**

**3,6-dinonyl-1,2,4,5-tetrazine (3I):** **3I** was prepared according to the previously published procedure<sup>1</sup> from commercially available decanenitrile. was purified by flash column chromatography (ethyl acetate/hexane 1:20) to afford **3I**.

**Physical Property:** Red crystal, m.p. = 32-33 °C.

**Isolated Yield:** 40%

**TLC:**  $R_f$  = 0.75 (silica gel, ethyl acetate/hexane 1:4).

**<sup>1</sup>H NMR** (500 MHz, CDCl<sub>3</sub>)  $\delta$  3.27 (t, 4H, J = 7.7 Hz), 1.97-1.88 (m, 4H), 1.46-1.19 (m, 24H), 0.90-0.83 (m, 6H).

**<sup>13</sup>C NMR** (125 MHz, CDCl<sub>3</sub>)  $\delta$  170.2, 34.8, 31.9, 29.4, 29.3, 29.3, 29.2, 28.3, 22.7, 14.1.

**IR** (neat): 2928, 2856, 1458, 1395, 906, 731, 668 cm<sup>-1</sup>.

**HRMS** (ESI) calculated for C<sub>20</sub>H<sub>39</sub>N<sub>4</sub> [M+H]<sup>+</sup> 335.3170, found 335.3180.

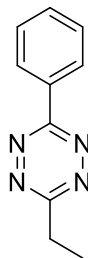

**3m**

**3-ethyl-6-phenyl-1,2,4,5-tetrazine (3m):** **3m** was prepared according to the previously published procedure<sup>1</sup> from commercially available propionitrile and benzonitrile. The product was purified by flash column chromatography (ethyl acetate/hexane 1:12) to afford **3m**.

**Physical Property:** Red oil.

**Isolated Yield:** 69%

**TLC:**  $R_f$  = 0.57 (silica gel, ethyl acetate/hexane 1:4).

**<sup>1</sup>H NMR** (500 MHz, CDCl<sub>3</sub>)  $\delta$  8.57-8.53 (m, 2H), 7.58-7.52 (m, 3H), 3.36 (q, 2H,  $J$  = 7.6 Hz), 1.53 (t, 3H,  $J$  = 7.6 Hz).

**<sup>13</sup>C NMR** (125 MHz, CDCl<sub>3</sub>)  $\delta$  170.8, 164.2, 132.5, 131.9, 129.2, 127.9, 28.3, 12.3.

**IR** (neat): 1465, 1396, 1265, 1091, 898, 736, 692 cm<sup>-1</sup>.

**HRMS** (ESI) calculated for C<sub>10</sub>H<sub>11</sub>N<sub>4</sub> [M+H]<sup>+</sup> 187.0980, no peak matched the calculated exact mass.

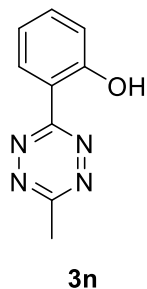

**2-(6-methyl-1,2,4,5-tetrazin-3-yl)phenol (3n):** **3n** was prepared according to the previously published procedure<sup>1</sup> from commercially available acetonitrile and 2-hydroxybenzonitrile. The product was purified by flash column chromatography (ethyl acetate/hexane 1:10) to afford **3n**.

**Physical Property:** Red crystal, m.p. = 63-64 °C.

**Isolated Yield:** 36%

**TLC:**  $R_f$  = 0.50 (silica gel, ethyl acetate/hexane 1:4).

**<sup>1</sup>H NMR** (500 MHz, CDCl<sub>3</sub>)  $\delta$  11.11 (bs, 1H), 8.64 (dd, 1H,  $J$  = 8.1, 1.7 Hz), 7.52 (ddd, 1H,  $J$  = 8.3, 7.2, 1.7 Hz), 7.14-7.05 (m, 2H), 3.12 (s, 3H).

**<sup>13</sup>C NMR** (125 MHz, CDCl<sub>3</sub>)  $\delta$  166.6, 164.9, 160.0, 135.1, 128.6, 120.3, 118.7, 114.1, 21.3.

**IR** (neat): 3053, 1618, 1585, 1484, 1402, 1265, 1234, 1085, 909, 759, 735 cm<sup>-1</sup>.

**HRMS** (ESI) calculated for C<sub>9</sub>H<sub>9</sub>N<sub>4</sub>O [M+H]<sup>+</sup> 189.0772, no peak matched the calculated exact mass.

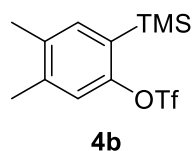

**4,5-dimethyl-2-(trimethylsilyl)phenyl trifluoromethanesulfonate (4b):** **4b** was obtained according to the literature procedures and <sup>1</sup>H NMR was matched with the literature.<sup>7</sup>

**Isolated Yield:** 82%.

**<sup>1</sup>H NMR** (500 MHz, CDCl<sub>3</sub>)  $\delta$  7.25 (s, 1H), 7.10 (s, 1H), 2.29 (s, 3H), 2.27 (s, 3H), 0.36 (s, 9H).

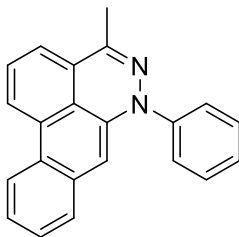

**5a**

**4-methyl-6-phenyl-6H-dibenzo[de,g]cinnoline (5a):** **5a** was prepared according to the general procedure using **3a** and **4a**. The product was purified by flash column chromatography (ethyl acetate/hexane 1:20) to afford **5a**.

**Physical Property:** Yellow solid, m.p. = 145-146 °C.

**Isolated Yield:** 51%.

**TLC:**  $R_f$  = 0.60 (silica gel, ethyl acetate/hexane 1:4).

**$^1\text{H}$  NMR** (500 MHz,  $\text{CD}_2\text{Cl}_2$ )  $\delta$  8.39 (d, 1H,  $J$  = 8.3 Hz), 8.34 (d, 1H,  $J$  = 8.2 Hz), 7.64-7.56 (m, 5H), 7.46-7.37 (m, 3H), 7.30 (ddd, 1H,  $J$  = 8.3, 6.2, 2.1 Hz), 7.26 (dd, 1H,  $J$  = 7.4, 0.9 Hz), 6.43 (s, 1H), 2.29 (s, 3H).

**$^{13}\text{C}$  NMR** (125 MHz,  $\text{CD}_2\text{Cl}_2$ )  $\delta$  144.4, 142.6, 137.7, 134.3, 131.8, 130.3, 128.7, 127.9, 127.8, 127.1, 127.1, 126.3, 126.2, 124.3, 123.1, 123.0, 122.8, 118.2, 97.7, 19.1.

**IR** (neat): 3057, 2920, 2850, 1618, 1588, 1496, 1441, 1400, 1340, 1305, 1272, 1233, 1207, 1142, 1024, 807, 756, 744, 735, 699, and 644  $\text{cm}^{-1}$ .

**HRMS** (ESI) calculated for  $\text{C}_{22}\text{H}_{17}\text{N}_2$   $[\text{M}+\text{H}]^+$  309.1387, found 309.1406.

**Quantum Yield ( $\Phi$ ):**

(a) 1.5 % of the neutral form.

(b) 27.7 % in the presence of 1073 equivalents of trifluoroacetic acid.

**Extinction Coefficient ( $\epsilon$ ):**

(a)  $7362 \pm 164$  (417 nm),  $16847 \pm 348$  (349 nm),  $18285 \pm 419$  (269 nm),  $34084 \pm 214$  (231 nm) for the neutral form.

(b)  $7378 \pm 181$  (411 nm),  $46894 \pm 370$  (230 nm) in the presence of 1073 equivalents of trifluoroacetic acid.

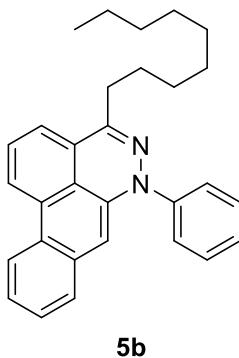

**4-nonyl-6-phenyl-6H-dibenzo[de,g]cinnoline (5b):** 3b was prepared according to the general procedure using **3b** and **4a**. The product was purified by flash column chromatography (ethyl acetate/hexane 1:25) to afford **5b**.

**Physical Property:** Yellow solid, m.p. = 99-100 °C.

**Isolated Yield:** 41%.

**TLC:**  $R_f$  = 0.74 (silica gel, diethylether/hexane 1:4).

**$^1\text{H}$  NMR** (500 MHz,  $\text{CD}_2\text{Cl}_2$ )  $\delta$  8.38 (d, 1H,  $J$  = 8.0 Hz), 8.34 (d, 1H,  $J$  = 8.1 Hz), 7.63-7.54 (m, 5H), 7.44-7.36 (m, 3H), 7.33-7.28 (m, 2H), 6.45 (s, 1H), 2.72-2.60 (m, 2H), 1.79-1.69 (m, 2H), 1.50-1.42 (m, 2H), 1.41-1.20 (m, 10H), 0.91-0.85 (m, 3H).

**$^{13}\text{C}$  NMR** (125 MHz,  $\text{CD}_2\text{Cl}_2$ )  $\delta$  145.8, 144.5, 137.7, 134.3, 132.0, 130.3, 128.7, 127.8, 127.1, 127.0, 126.6, 125.7, 124.4, 123.1, 122.78, 122.76, 118.0, 97.6, 32.7, 32.3, 30.04, 30.01, 29.9, 29.8, 27.1, 23.1, 14.3.

**IR** (neat): 3050, 2925, 2852, 1616, 1588, 1496, 1461, 1442, 1399, 1338, 1301, 1264, 1232, 1206, 1142, 815, 738, 704, 668, and 649  $\text{cm}^{-1}$ .

**HRMS** (ESI) calculated for  $\text{C}_{30}\text{H}_{33}\text{N}_2$   $[\text{M}+\text{H}]^+$  421.2639, found 421.2630.

**Quantum Yield ( $\Phi$ ):**

(a) 1.2% of the neutral form.

(b) 6.6% in the presence of 1048 equivalents of trifluoroacetic acid.

**Extinction Coefficient ( $\epsilon$ ):**

(a)  $9205 \pm 358$  (419 nm),  $15954 \pm 109$  (350 nm),  $17336 \pm 601$  (269 nm),  $34072 \pm 342$  (229 nm) for the neutral form.

(b)  $7103 \pm 16$  (419 nm),  $42445 \pm 459$  (229 nm) in the presence of 1048 equivalents of trifluoroacetic acid.



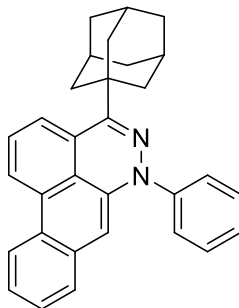

**5c**

**4-((3*r*,5*r*,7*r*)-adamantan-1-yl)-6-phenyl-6*H*-dibenzo[*de,g*]cinnoline (5c):** **5c** was prepared according to the general procedure using **1c** and **4a**. The product was purified by flash column chromatography (ethyl acetate/hexane 1:30) to afford **5c**.

**Physical Property:** Yellow oil.

**Isolated Yield** 10%.

**TLC:**  $R_f$  = 0.79 (silica gel, ethyl acetate/hexane 1:4).

**$^1\text{H}$  NMR** (500 MHz,  $\text{CDCl}_3$ )  $\delta$  8.37 (m, 2H), 7.90 (d, 1H,  $J$  = 7.5 Hz), 7.66-7.52 (m, 5H), 7.44-7.36 (m, 3H), 7.31 (ddd, 1H,  $J$  = 8.3, 6.2, 1.7 Hz), 6.56 (s, 1H), 2.25-2.19 (m, 6H), 2.14 (bs, 3H), 1.90-1.80 (m, 6H).

**$^{13}\text{C}$  NMR** (125 MHz,  $\text{CDCl}_3$ )  $\delta$  149.4, 144.3, 136.5, 133.5, 132.0, 129.6, 127.5, 127.30, 127.28, 126.9, 126.4, 125.7, 124.13, 123.9, 122.7, 122.3, 121.8, 120.1, 96.9, 40.5, 40.0, 37.0, 29.0.

**IR** (neat): 2903, 2848, 1612, 1584, 1494, 1440, 1392, 1339, 1288, 1233, 1144, 760, 736  $\text{cm}^{-1}$ .

**HRMS** (ESI) calculated for  $\text{C}_{31}\text{H}_{28}\text{N}_2$   $[\text{M}+\text{H}]^+$  429.2326, found 429.2298.

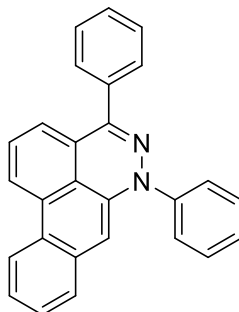

**5d**

**4,6-diphenyl-6H-dibenzo[de,g]cinnoline (5d):** **5d** was prepared according to the general procedure using **3d** and **4a**. The product was purified by flash column chromatography (ethyl acetate/hexane 1:20) to afford **5d**.

**Physical Property:** Yellow solid, m.p. = 135-136 °C.

**Isolated Yield** 26%.

**TLC:**  $R_f$  = 0.53 (silica gel, diethylether/hexane 1:4).

**$^1\text{H}$  NMR** (500 MHz,  $\text{CD}_2\text{Cl}_2$ )  $\delta$  8.37 (d, 1H,  $J$  = 8.0 Hz), 8.34 (d, 1H,  $J$  = 8.1 Hz), 7.65-7.60 (m, 4H), 7.59-7.54 (m, 2H), 7.53-7.37 (m, 7H), 7.33 (ddd, 1H,  $J$  = 8.2, 6.3, 2.1 Hz), 7.20 (dd, 1H,  $J$  = 7.5, 0.9 Hz), 6.45 (s, 1H).

**$^{13}\text{C}$  NMR** (125 MHz,  $\text{CD}_2\text{Cl}_2$ )  $\delta$  146.0, 143.7, 137.2, 136.0, 133.8, 131.7, 129.9, 128.6, 128.53, 128.51, 128.1, 127.6, 127.5, 126.8, 126.4, 125.4, 124.2, 123.0, 122.6, 122.4, 119.4, 97.7.

**IR** (neat): 3052, 2918, 2848, 1614, 1586, 1492, 1458, 1441, 1398, 1320, 1237, 1145, 1129, 984, 816, 761, 735, and 698  $\text{cm}^{-1}$ .

**HRMS** (ESI) calculated for  $\text{C}_{27}\text{H}_{19}\text{N}_2$   $[\text{M}+\text{H}]^+$  371.1543, found 371.1547.

**Quantum Yield ( $\Phi$ ):**

(a) 0.7% of the neutral form

(b) 8.1% in the presence of 1034 equivalents of trifluoroacetic acid.

**Extinction Coefficient ( $\epsilon$ ):**

(a)  $4478 \pm 140$  (419 nm),  $13669 \pm 371$  (357 nm),  $18217 \pm 536$  (261 nm),  $25145 \pm 719$  (242 nm) for the neutral form.

(b)  $7346 \pm 19$  (417 nm),  $25976 \pm 371$  (404 nm) in the presence of 1034 equivalents of trifluoroacetic acid.

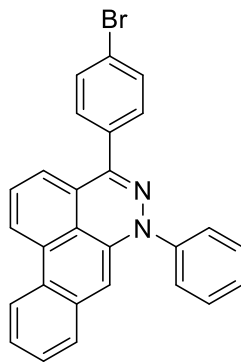

**5e**

**4-(4-bromophenyl)-6-phenyl-6H-dibenzo[de,g]cinnoline (5e):** **5e** was prepared according to the general procedure using **3e** and **4a**. The product was purified by flash column chromatography (ethyl acetate/hexane 1:20) to afford **5e**.

**Physical Property:** Yellow solid, m.p. = 188-189 °C.

**Isolated Yield** 46%.

**TLC:**  $R_f$  = 0.59 (silica gel, diethylether/hexane 1:4).

**$^1\text{H}$  NMR** (500 MHz,  $\text{CD}_2\text{Cl}_2$ )  $\delta$  8.37 (d, 1H,  $J$  = 8.3 Hz), 8.33 (d, 1H,  $J$  = 8.2 Hz), 7.65-7.38 (m, 12H), 7.33 (ddd, 1H,  $J$  = 8.1, 5.9, 2.4 Hz), 7.21 (dd, 1H,  $J$  = 7.4, 0.5 Hz), 6.45 (s, 1H).

**$^{13}\text{C}$  NMR** (125 MHz,  $\text{CD}_2\text{Cl}_2$ )  $\delta$  144.8, 143.6, 137.1, 135.0, 133.7, 131.8, 131.7, 130.2, 129.9, 128.1, 127.7, 127.5, 126.92, 126.88, 126.5, 125.1, 124.2, 123.2, 122.7, 122.4, 122.4, 119.1, 98.0.

**IR** (neat): 3064, 2916, 2848, 2176, 1614, 1588, 1493, 1456, 1441, 1315, 1237, 1144, 1128, 1080, 1011, 984, 832, 757, 737, and 625  $\text{cm}^{-1}$ .

**HRMS** (ESI) calculated for  $\text{C}_{27}\text{H}_{18}\text{BrN}_2$   $[\text{M}+\text{H}]^+$  449.0648, found 449.0643.

**Quantum Yield ( $\Phi$ ):**

(a) 0.5% of the neutral form.

(b) 6.9% in the presence of 1083 equivalents of trifluoroacetic acid.

**Extinction Coefficient ( $\epsilon$ ):**

(a)  $5949 \pm 130$  (418 nm),  $19021 \pm 243$  (358 nm),  $34833 \pm 827$  (243 nm) for the neutral form.

(b)  $7960 \pm 63$  (418 nm),  $11769 \pm 581$  (356 nm),  $40935 \pm 701$  (242 nm) in the presence of 1083 equivalents of trifluoroacetic acid.

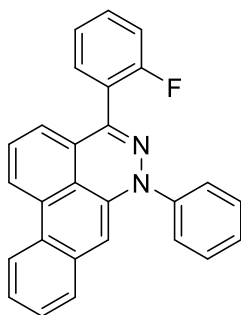

**5f**

**4-(2-fluorophenyl)-6-phenyl-6H-dibenzo[de,g]cinnoline (5f):** **5f** was prepared according to the general procedure using **3f** and **4a**. The product was purified by flash column chromatography (ethyl acetate/hexane 1:20) to afford **5f**.

**Physical Property:** Yellow solid, m.p. = 80-81 °C.

**Isolated Yield** 19%.

**TLC:**  $R_f$  = 0.63 (silica gel, ethyl acetate/hexane 1:4).

**$^1\text{H}$  NMR** (500 MHz,  $\text{CDCl}_3$ )  $\delta$  8.40-8.33 (m, 2H), 7.66-7.39 (m, 10H), 7.38-7.33 (m, 1H), 7.31 (td, 1H,  $J$  = 7.5, 1.2 Hz), 7.26-7.21 (m, 1H), 6.92 (ddd, 1H,  $J$  = 7.4, 2.9, 0.9 Hz).

**$^{13}\text{C}$  NMR** (125 MHz,  $\text{CDCl}_3$ )  $\delta$  161.7, 159.7, 143.5, 141.7, 137.1, 133.7, 131.6, 131.43, 131.40, 130.73, 130.66, 130.0, 128.3, 127.8, 127.5, 126.9, 126.5, 125.5, 124.70, 124.67, 124.3, 123.7, 123.6, 123.2, 122.7, 122.4, 119.25, 119.23, 116.0, 115.8, 98.1.

**$^{19}\text{F}$  NMR** (338 MHz,  $\text{CD}_2\text{Cl}_2$ )  $\delta$  -113.3 to -113.4 (m, 1F).

**IR** (neat): 1738, 1373, 1238, 1045, 939, 918  $\text{cm}^{-1}$ .

**HRMS** (ESI) calculated for  $\text{C}_{27}\text{H}_{18}\text{FN}_2$   $[\text{M}+\text{H}]^+$  389.1449, found 389.1454.

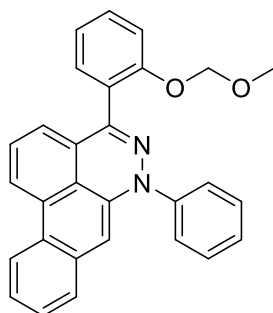

**5g**

**4-(2-(methoxymethoxy)phenyl)-6-phenyl-6H-dibenzo[de,g]cinnoline (5g):** **5g** was prepared according to the general procedure using **3g** and **4a**. The product was purified by flash column chromatography (ethyl acetate/hexane 1:15) to afford **5g**.

**Physical Property:** Yellow oil.

**Isolated Yield** 25%.

**TLC:**  $R_f$  = 0.45 (silica gel, ethyl acetate/hexane 1:4).

**$^1\text{H}$  NMR** (500 MHz,  $\text{CDCl}_3$ )  $\delta$  8.35 (dd, 2H,  $J$  = 8.6, 2.8 Hz), 7.66-7.61 (m, 2H), 7.60-7.54 (m, 2H), 7.51-7.38 (m, 6H), 7.33 (ddd, 1H,  $J$  = 8.3, 6.6, 1.7 Hz), 7.25 (d, 1H,  $J$  = 8.0 Hz), 7.14 (td, 1H,  $J$  = 7.6, 1.0 Hz), 6.84 (dd, 1H,  $J$  = 7.3, 0.7 Hz), 6.50 (s, 1H), 5.15 (m, 2H), 3.36 (s, 3H).

**$^{13}\text{C}$  NMR** (125 MHz,  $\text{CDCl}_3$ )  $\delta$  155.6, 144.5, 143.7, 137.2, 133.8, 131.4, 130.9, 130.1, 129.8, 128.1, 127.5, 127.4, 126.8, 126.4, 126.3, 125.95, 125.90, 124.2, 123.0, 122.3, 122.2, 119.8, 114.8, 97.6, 94.7, 56.1.

**IR** (neat): 3053, 1587, 1493, 1453, 1440, 1398, 1319, 1264, 1234, 1153, 996, 735, 703  $\text{cm}^{-1}$ .

**HRMS** (ESI) calculated for  $\text{C}_{29}\text{H}_{23}\text{N}_2\text{O}_2$   $[\text{M}+\text{H}]^+$  431.1755, found 431.1760.

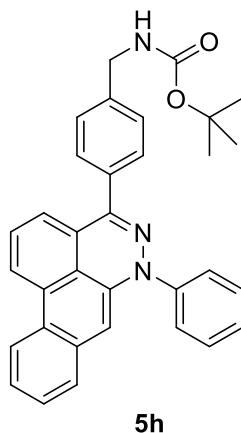

**tert-butyl (4-(6-phenyl-6H-dibenzo[de,g]cinnolin-4-yl)benzyl)carbamate (5h):** **5h** was prepared according to the general procedure using **3h** and **4a**. The product was purified by flash column chromatography (ethyl acetate/hexane 1:4) to afford **5h**.

**Physical Property:** Yellow solid, m.p. = 177-178 °C.

**Isolated Yield:** 31%.

**TLC:**  $R_f$  = 0.21 (silica gel, ethyl acetate/hexane 1:4).

**$^1\text{H}$  NMR** (500 MHz,  $\text{CD}_2\text{Cl}_2$ )  $\delta$  8.40-8.25 (m, 2H), 7.67-7.56 (m, 5H), 7.55-7.49 (m, 1H), 7.48-7.38 (m, 5H), 7.34 (ddd, 1H,  $J$  = 8.3, 6.1, 2.2 Hz), 7.27 (d, 1H,  $J$  = 7.3 Hz), 6.47 (s, 1H), 5.03 (bs, 1H), 4.37 (d, 1H,  $J$  = 5.8 Hz), 1.48 (s, 9H).

**$^{13}\text{C}$  NMR** (125 MHz,  $\text{CD}_2\text{Cl}_2$ )  $\delta$  155.8, 145.7, 143.7, 140.1, 137.2, 134.9, 133.8, 131.8, 129.9, 128.7, 128.1, 127.7, 127.5, 127.4, 126.9, 126.8, 126.5, 125.4, 124.2, 123.1, 122.6, 122.4, 119.5, 97.8, 79.2, 44.3, 28.1.

**IR** (neat): 3345, 2976, 1707, 1612, 1586, 1492, 1440, 1397, 1365, 1318, 1288, 1271, 1237, 1167, 1145, 1129, 760, 737, 695  $\text{cm}^{-1}$ .

**HRMS** (ESI) calculated for  $\text{C}_{33}\text{H}_{30}\text{N}_3\text{O}_2$   $[\text{M}+\text{H}]^+$  500.2333, found 500.2332.

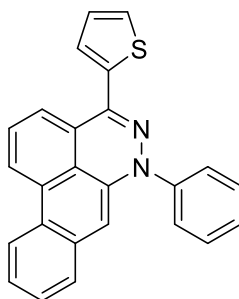

**5i**

**6-phenyl-4-(thiophen-2-yl)-6H-dibenzo[de,g]cinnoline (5i):** **5i** was prepared according to the general procedure using **3i** and **4a**. The product was purified by flash column chromatography (ethyl acetate/hexane 1:20) to afford **5i**.

**Physical Property:** Red solid, m.p. = 139-140 °C.

**Isolated Yield** 52%.

**TLC:**  $R_f$  = 0.56 (silica gel, diethylether/hexane 1:4).

**$^1\text{H}$  NMR** (500 MHz,  $\text{CD}_2\text{Cl}_2$ )  $\delta$  8.40 (d, 1H,  $J$  = 8.4 Hz), 8.35 (d, 1H,  $J$  = 8.1 Hz), 7.66 (dd, 1H,  $J$  = 7.5, 1.0 Hz), 7.64-7.53 (m, 6H), 7.48-7.38 (m, 4H), 7.34 (ddd, 1H,  $J$  = 8.2, 6.0, 2.2 Hz), 7.16 (dd, 1H,  $J$  = 5.1, 3.5 Hz), 6.47 (s, 1H).

**$^{13}\text{C}$  NMR** (125 MHz,  $\text{CD}_2\text{Cl}_2$ )  $\delta$  143.9, 140.4, 138.8, 137.2, 134.1, 132.3, 130.4, 128.7, 128.3, 128.0, 127.5, 127.4, 127.3, 127.1, 126.9, 126.1, 125.4, 124.8, 123.8, 123.3, 122.9, 119.5, 98.8.

**IR** (neat): 3057, 2922, 2850, 1614, 1586, 1492, 1458, 1443, 1394, 1338, 1293, 1238, 1146, 1128, 947, 798, 752, 700, 694, and 674  $\text{cm}^{-1}$ .

**HRMS** (ESI) calculated for  $\text{C}_{25}\text{H}_{17}\text{N}_2\text{S}$   $[\text{M}+\text{H}]^+$  377.1107, found 377.1099.

**Quantum Yield ( $\Phi$ ):**

(a) 0.6% of the neutral form.

(b) 1.5% in the presence of 1001 equivalents of trifluoroacetic acid.

**Extinction Coefficient ( $\epsilon$ ):**

(a)  $4610 \pm 20$  (418 nm),  $14238 \pm 20$  (362 nm),  $27222 \pm 192$  (244 nm) for the neutral form.

(b)  $6395 \pm 318$  (419 nm),  $9607 \pm 879$  (360 nm),  $31340 \pm 27$  (242 nm),  $38234 \pm 959$  (228 nm) in the presence of 1001 equivalents of trifluoroacetic acid.

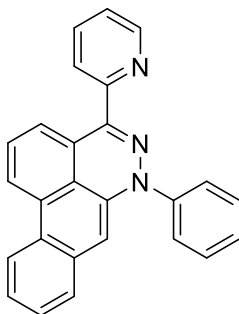

**5j**

**6-phenyl-4-(pyridin-2-yl)-6H-dibenzo[de,g]cinnoline (5j):** **5j** was prepared according to the general procedure using **3j** and **4a**. The product was purified by flash column chromatography (ethyl acetate/hexane 1:4) to afford **5j**.

**Physical Property:** Orange solid, m.p. = 139-140 °C.

**Isolated Yield** 15%.

**TLC:**  $R_f$  = 0.12 (silica gel, diethylether/hexane 1:4).

**$^1\text{H}$  NMR** (500 MHz,  $\text{CD}_2\text{Cl}_2$ )  $\delta$  8.70 (d, 1H,  $J$  = 4.5 Hz), 8.40 (d, 1H,  $J$  = 8.3 Hz), 8.37 (d, 1H,  $J$  = 8.2 Hz), 8.04 (d, 1H,  $J$  = 7.6 Hz), 7.81 (td, 1H,  $J$  = 7.7, 1.8 Hz), 7.76 (d, 1H,  $J$  = 7.9 Hz), 7.68-7.55 (m, 5H), 7.51-7.33 (m, 5H), 6.45 (s, 1H).

**$^{13}\text{C}$  NMR** (125 MHz,  $\text{CD}_2\text{Cl}_2$ )  $\delta$  156.0, 148.8, 144.1, 143.8, 137.6, 137.3, 134.0, 132.1, 130.5, 128.6, 128.3, 127.9, 127.7, 127.3, 127.1, 125.01, 124.99, 123.74, 123.73, 123.6, 123.0, 122.8, 121.0, 98.7.

**IR** (neat): 3052, 2922, 1614, 1586, 1494, 1472, 1458, 1443, 1429, 1398, 1338, 1322, 1264, 1150, 1055, 997, 819, 736, 708, 698, and  $645\text{ cm}^{-1}$ .

**HRMS** (ESI) calculated for  $\text{C}_{26}\text{H}_{18}\text{N}_3$   $[\text{M}+\text{H}]^+$  372.1496, found 372.1498.

**Quantum Yield ( $\Phi$ ):**

(a) 0.6% of the neutral form

(b) 0.0% in the presence of 1048 equivalents of trifluoroacetic acid.

**Extinction Coefficient ( $\epsilon$ ):**

(a)  $1641 \pm 46$  (413 nm),  $5306 \pm 80$  (361 nm),  $17336 \pm 601$  (271 nm) for the neutral form.

(b)  $1749 \pm 100$  (560 nm),  $3857 \pm 118$  (365 nm),  $26933 \pm 133$  (228 nm) in the presence of 1048 equivalents of trifluoroacetic acid.



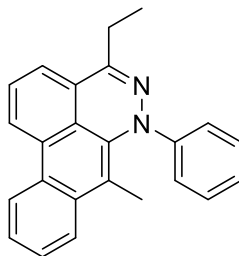

**5k**

**4-ethyl-7-methyl-6-phenyl-6H-dibenzo[de,g]cinnoline (5k):** **5k** was prepared according to the general procedure using **3k** and **4a**. The product was purified by flash column chromatography (ethyl acetate/hexane 1:30) to afford **5k**.

**Physical Property:** Yellow solid, m.p. = 60-61 °C.

**Isolated Yield:** 44%.

**TLC:**  $R_f$  = 0.80 (silica gel, ethyl acetate/hexane 1:4).

**$^1\text{H}$  NMR** (500 MHz,  $\text{CD}_2\text{Cl}_2$ )  $\delta$  8.53-8.48 (m, 2H), 7.87 (dd, 1H,  $J$  = 8.4, 0.6 Hz), 7.64-7.56 (m, 2H) 7.48 (ddd, 1H,  $J$  = 8.2, 7.0, 1.2 Hz), 7.40 (dd, 1H,  $J$  = 7.4, 0.8 Hz), 7.40-7.33 (m, 4H), 7.10 (tt, 1H, 6.8, 1.7 Hz), 2.82 (q, 2H, 7.4 Hz), 2.01 (s, 3H), 1.37 (t, 3H, 7.5 Hz)

**$^{13}\text{C}$  NMR** (125 MHz,  $\text{CD}_2\text{Cl}_2$ )  $\delta$  149.7, 148.2, 134.3, 132.1, 129.6, 128.8, 127.3, 127.2, 126.9, 125.6, 123.5, 123.4, 122.9, 122.6, 121.2, 118.4, 109.2, 25.4, 16.9, 10.8.

**IR** (neat): 2916, 2849, 2360, 2342, 1587, 1485, 1446, 1388, 1372, 1335, 1283, 1265, 1231, 1212, 1138, 1032, 1012, 752, 737, 691, 668  $\text{cm}^{-1}$ .

**HRMS** (ESI) calculated for  $\text{C}_{24}\text{H}_{20}\text{N}_2$   $[\text{M}]^+$  336.1621, found 336.1630.

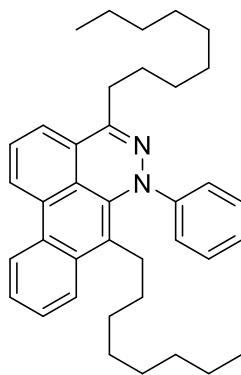

**5I**

**4-nonyl-7-octyl-6-phenyl-6H-dibenzo[de,g]cinnoline (5I):** **5I** was prepared according to the general procedure using **3I** and **4a**. The product was purified by flash column chromatography (ethyl acetate/hexane 1:30) to afford **5I**.

**Physical Property:** Yellow oil.

**Isolated Yield:** 24%.

**TLC:**  $R_f$  = 0.80 (silica gel, ethyl acetate/hexane 1:4).

**$^1\text{H}$  NMR** (500 MHz,  $\text{CD}_2\text{Cl}_2$ )  $\delta$  8.51 (d, 1H,  $J$  = 8.6 Hz), 8.48 (d, 1H,  $J$  = 8.2 Hz), 7.89 (d, 1H,  $J$  = 8.4 Hz), 7.63-7.58 (m, 1H), 7.55 (ddd, 1H,  $J$  = 8.5, 6.9, 1.3 Hz), 7.46 (ddd, 1H,  $J$  = 8.1, 6.9, 1.1 Hz), 7.43-7.38 (m, 3H), 7.36-7.30 (m, 2H), 7.10 (tt, 1H,  $J$  = 7.3, 1.1 Hz), 2.76 (t, 2H,  $J$  = 7.7 Hz), 2.59 (t, 2H,  $J$  = 7.6 Hz), 1.83-1.75 (m, 2H), 1.52-1.44 (m, 2H), 1.42-1.22 (m, 14H), 1.22-1.04 (m, 8H), 0.94-0.82 (m, 6H).

**$^{13}\text{C}$  NMR** (125 MHz,  $\text{CD}_2\text{Cl}_2$ )  $\delta$  149.1, 148.9, 133.5, 132.1, 129.6, 129.0, 127.4, 127.0, 126.8, 126.2, 124.1, 123.89, 123.86, 123.4, 122.9, 122.8, 121.3, 118.5, 115.5, 32.2, 31.8, 31.8, 29.5, 29.5, 29.4, 29.32, 29.28, 29.19, 29.1, 28.2, 26.7, 22.67, 22.60, 13.84, 13.82.

**IR** (neat): 2954, 2924, 2853, 2361, 2340, 1586, 1490, 1438, 1386, 1332, 1281, 1264, 1228, 1211, 1136, 818, 755, 694,  $612\text{ cm}^{-1}$ .

**HRMS** (ESI) calculated for  $\text{C}_{38}\text{H}_{48}\text{N}_2$   $[\text{M}]^+$  532.3812, found 532.3821.

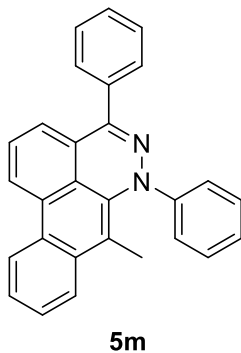

**7-methyl-4,6-diphenyl-6H-dibenzo[de,g]cinnoline (5m):** **5m** was prepared according to the general procedure using **3m** and **4a**. The product was purified by flash column chromatography (ethyl acetate/hexane 1:20) to afford **5m**.

**Physical Property:** Yellow oil.

**Isolated Yield:** 11%.

**TLC:**  $R_f$  = 0.61 (silica gel, ethyl acetate/hexane 1:4).

**$^1\text{H}$  NMR** (500 MHz,  $\text{CD}_2\text{Cl}_2$ )  $\delta$  8.53-8.48 (m, 2H), 7.88 (dd, 1H,  $J$  = 8.3, 0.9 Hz), 7.68-7.63 (m, 2H), 7.59 (ddd, 1H,  $J$  = 8.3, 6.9, 1.3 Hz), 7.55-7.45 (m, 5H), 7.43-7.33 (m, 4H), 7.30 (dd, 1H,  $J$  = 7.5, 0.9 Hz), 7.13 (tt, 1H, 7.1, 1.5 Hz), 2.02 (s, 3H).

**$^{13}\text{C}$  NMR** (125 MHz,  $\text{CD}_2\text{Cl}_2$ )  $\delta$  149.1, 148.1, 135.9, 134.5, 132.1, 129.8, 128.9, 128.82, 128.80, 128.5, 128.1, 127.5, 126.7, 125.7, 123.88, 123.86, 123.81, 123.6, 123.1, 122.7, 121.3, 120.6, 109.4, 16.8

**IR** (neat): 2916, 2849, 2348, 1594, 1489, 1460, 1445, 1372, 1138, 1031, 755, 696, 655, 644  $\text{cm}^{-1}$ .

**HRMS** (ESI) calculated for  $\text{C}_{28}\text{H}_{20}\text{N}_2$   $[\text{M}]^+$  384.1621, found 384.1612.

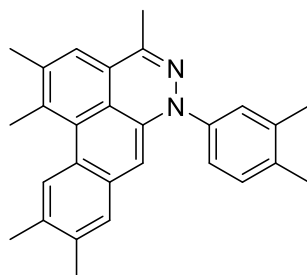

**5n**

**6-(3,4-dimethylphenyl)-1,2,4,9,10-pentamethyl-6H-dibenzo[de,g]cinnoline (5n):** **5n** was prepared according to the general procedure using **1a** and **4b**. The product was purified by flash column chromatography (ethyl acetate/hexane 1:20) to afford **5n**.

**Physical Property:** Yellow oil.

**Isolated Yield:** 24%.

**TLC:**  $R_f$  = 0.54 (silica gel, ethyl acetate/hexane 1:4).

**$^1\text{H}$  NMR** (500 MHz,  $\text{CD}_2\text{Cl}_2$ )  $\delta$  8.20 (s, 1H), 7.33-7.25 (m, 2H), 7.25-7.20 (m, 1H), 7.16 (s, 1H), 7.12 (s, 1H), 6.21 (s, 1H), 2.85 (s, 3H), 2.54 (s, 3H), 2.41 (s, 3H), 2.36 (s, 3H), 2.34 (s, 3H), 2.33 (s, 3H), 2.27 (s, 3H).

**$^{13}\text{C}$  NMR** (125 MHz,  $\text{CD}_2\text{Cl}_2$ )  $\delta$  142.0, 141.3, 138.5, 137.9, 137.0, 136.0, 135.8, 134.2, 133.7, 131.3, 130.7, 129.7, 128.2, 127.9, 126.3, 125.0, 124.0, 123.3, 123.0, 119.5, 96.7, 21.7, 21.6, 20.1, 19.6, 19.5, 19.22, 18.7.

**IR** (neat): 2916, 2857, 1606, 1502, 1449, 1372, 1300, 1235, 1194, 1170, 1086, 1014, 871, 803, 736  $\text{cm}^{-1}$ .

**HRMS** (ESI) calculated for  $\text{C}_{28}\text{H}_{28}\text{N}_2$   $[\text{M}]^+$  392.2247, found 392.2252.

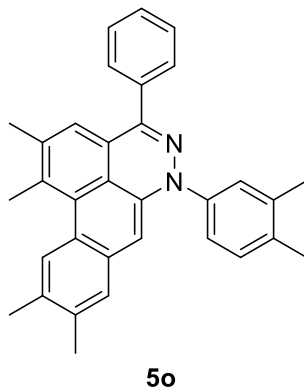

**6-(3,4-dimethylphenyl)-1,2,9,10-tetramethyl-4-phenyl-6H-dibenzo[de,g]cinnoline (5o):** **5o** was prepared according to the general procedure using **3d** and **4b**. The product was purified by flash column chromatography (ethyl acetate/hexane 1:20) to afford **5o**.

**Physical Property:** Yellow oil.

**Isolated Yield:** 31%.

**TLC:**  $R_f$  = 0.59 (silica gel, ethyl acetate/hexane 1:4).

**$^1\text{H}$  NMR** (500 MHz,  $\text{CD}_2\text{Cl}_2$ )  $\delta$  8.18 (s, 1H), 7.63-7.60 (m, 2H), 7.50-7.40 (m, 3H), 7.35-7.25 (m, 3H), 7.17 (s, 1H), 7.09 (s, 1H), 6.25 (s, 1H), 2.83 (s, 3H), 2.423 (s, 3H), 2.416 (s, 3H), 2.36 (s, 3H), 2.34 (s, 3H), 2.35-2.32 (m, 6H).

**$^{13}\text{C}$  NMR** (125 MHz,  $\text{CD}_2\text{Cl}_2$ )  $\delta$  145.3, 141.8, 138.6, 137.9, 136.9, 136.4, 136.2, 136.0, 134.1, 133.9, 131.7, 130.7, 130.7, 130.1, 128.6, 128.5, 128.4, 128.2, 127.6, 126.4, 126.2, 123.8, 123.6, 122.4, 121.1, 29.7, 21.5, 20.1, 19.6, 19.4, 19.2.

**IR** (neat): 2921, 1603, 1500, 1418, 1300, 1264, 1227, 1141, 1068, 1005, 878, 831, 738, 687  $\text{cm}^{-1}$ .

**HRMS** (ESI) calculated for  $\text{C}_{33}\text{H}_{30}\text{N}_2$   $[\text{M}]^+$  454.2404, found 454.2403.

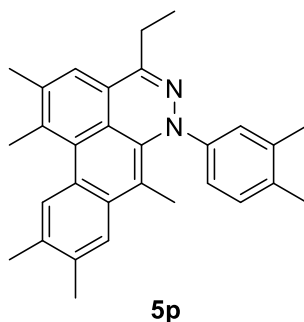

**6-(3,4-dimethylphenyl)-4-ethyl-1,2,7,9,10-pentamethyl-6H-dibenzo[de,g]cinnoline (5p):** **5p** was prepared according to the general procedure using **3k** and **4b**. The product was purified by flash column chromatography (ethyl acetate/hexane 1:20) to afford **5p**.

**Physical Property:** Yellow oil.

**Isolated Yield:** 30%.

**TLC:**  $R_f$  = 0.69 (silica gel, ethyl acetate/hexane 1:4).

**$^1\text{H}$  NMR** (500 MHz,  $\text{CD}_2\text{Cl}_2$ )  $\delta$  8.22 (s, 1H), 7.55 (s, 1H), 7.27 (s, 1H), 7.11 (d, 1H,  $J$  = 2.3 Hz), 7.04 (d, 1H,  $J$  = 8.2 Hz), 6.92 (dd, 1H,  $J$  = 8.2, 2.3 Hz), 2.85 (s, 3H), 2.79 (q, 2H,  $J$  = 7.4 Hz), 2.55 (s, 3H), 2.48 (s, 3H), 2.46 (s, 3H), 2.242 (s, 3H), 2.237 (s, 3H), 1.91 (s, 3H), 1.33 (3H, t, 7.4 Hz).

**$^{13}\text{C}$  NMR** (125 MHz,  $\text{CD}_2\text{Cl}_2$ )  $\delta$  148.6, 146.6, 137.2, 136.7, 135.8, 134.9, 133.9, 131.8, 131.6, 130.4, 129.7, 129.5, 128.9, 126.8, 124.7, 123.0, 122.7, 120.7, 120.5, 118.7, 108.2, 25.5, 21.7, 21.6, 20.1, 20.0, 19.9, 19.0, 16.8, 11.3.

**IR** (neat): 2968, 2917, 1607, 1594, 1499, 1488, 1453, 1357, 1264, 1195, 1166, 1002, 865, 820, 737  $\text{cm}^{-1}$ .

**HRMS** (ESI) calculated for  $\text{C}_{30}\text{H}_{32}\text{N}_2$   $[\text{M}]^+$  420.2560, found 420.2550.

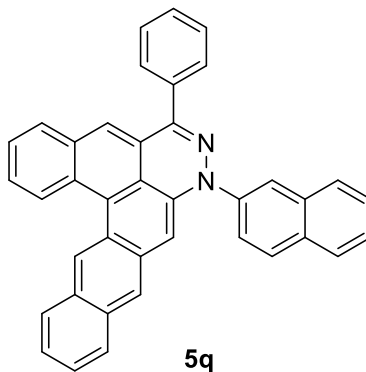

**8-(naphthalen-2-yl)-6-phenyl-8H-dinaphtho[3,2,1-de:2',3'-g]cinnoline (5q):** A vial was charged with 14.8 mg (0.086 mmol) of **3d** and 300 mg (0.86 mmol) of 3-(trimethylsilyl)-2-naphthyl trifluoromethanesulfonate in 0.09 mL of dichloromethane at 24°C, and 1 M TBAF in THF (0.95 mL, 0.95 mmol) was slowly added to the solution over the course of 1 min. After the addition, the solution was concentrated in vacuo, and filtered on the silica gel, and purified by preparative TLC using ethyl acetate/hexane (1:10) as the eluent to give 0.61 mg of **5q**.

**Physical Property:** Red solid.

**Isolated Yield:** 1 %.

**TLC:**  $R_f$  = 0.50 (silica gel, ethyl acetate/hexane 1:4).

**$^1\text{H}$  NMR** (500 MHz,  $\text{CD}_2\text{Cl}_2$ )  $\delta$  9.43 (s, 1H), 9.18 (d, 1H,  $J$  = 8.6 Hz), 8.21 (s, 1H), 8.15–7.94 (m, 6H), 7.90 (d, 1H,  $J$  = 8.0 Hz), 7.88–7.44 (m, 13H), 7.01 (s, 1H).

**$^{13}\text{C}$  NMR** (125 MHz,  $\text{CD}_2\text{Cl}_2$ )  $\delta$  146.3, 141.9, 136.78, 136.73, 134.7, 134.6, 133.5, 133.1, 132.9, 131.3, 130.9, 130.2, 129.7, 129.4, 129.3, 129.2, 129.1, 128.7, 128.5, 128.31, 128.26, 128.0, 127.8, 127.4, 127.3, 127.1, 126.9, 126.8, 125.8, 125.5, 125.4, 124.8, 124.2, 124.0, 122.8, 122.0, 101.2.

**HRMS** (ESI) calculated for  $\text{C}_{38}\text{H}_{48}\text{N}_2$   $[\text{M}]^+$  520.1934, found 520.1930.

**Quantum Yield ( $\Phi$ ):**

(a) 6.7% of the neutral form.

(b) 2.0% in the presence of 1001 equivalents of trifluoroacetic acid.

**Extinction Coefficient ( $\epsilon$ ):**

(a)  $2061 \pm 339$  (532 nm),  $1850 \pm 355$  (501 nm),  $9469 \pm 57$  (362 nm),  $8663 \pm 100$  (340 nm),  $23217 \pm 698$  (266 nm),  $23141 \pm 720$  (257 nm) for the neutral form.

(b)  $2290 \pm 519$  (524 nm),  $15500 \pm 793$  (279 nm) in the presence of 1001 equivalents of trifluoroacetic acid.

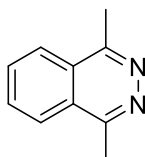

**6**

**1,4-dimethylphthalazine (6):** A vial was charged with 400 mg (4 mmol) of **1a** and 0.48 mL (2 mmol) of **2** in 2.0 mL of dichloromethane at 24 °C, and 1 M TBAF in THF (2.2 mmol, 1.1 mL) was slowly added to the solution over the course of 1 min. After the addition, the solution was concentrated in vacuo, and filtered on the silica gel, and purified by flash column chromatography (ethyl acetate = 100%) to afford 23 mg of **4**. The data for this compound was previously reported in the literature.<sup>8</sup>

**Physical Property:** White solid.

**Isolated Yield:** 7 %.

**TLC:**  $R_f$  = 0.10 (silica gel, 100% ethyl acetate).

**<sup>1</sup>H NMR** (500 MHz, CDCl<sub>3</sub>)

$\delta$  8.03 (dd, 2H,  $J$  = 6.3, 3.3 Hz), 7.86 (dd, 2H,  $J$  = 6.3, 3.3 Hz), 2.93 (s, 6H).

**<sup>13</sup>C NMR** (125 MHz, CDCl<sub>3</sub>)

$\delta$  156.26, 131.80, 125.85, 124.79, 19.76.



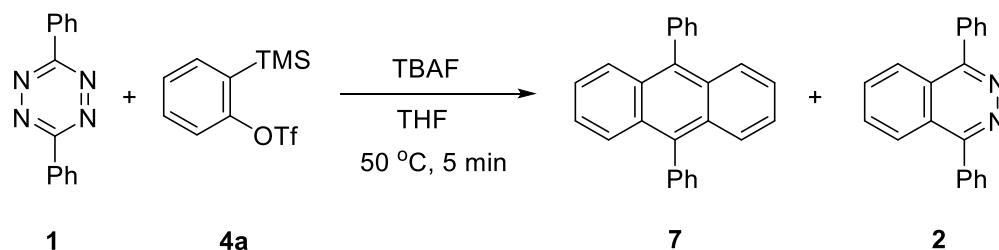

**9,10-diphenylanthracene (7) and 1,4-diphenylphthalazine (2):** A vial was charged with 23.4 mg (0.1 mmol) of **1** and 298.4 mg (1 mmol) of **4a** in 0.1 mL of THF at 24 °C, and 1 M TBAF in THF (1.1 mmol, 1.1 mL) was added to the solution. After the addition, the solution was heated to 50 °C for 2 hours and then was concentrated in vacuo, and filtered on the silica gel, and purified by flash column chromatography (ethyl acetate/hexane 1:4) to afford 10 mg of **7** and 8 mg of **2**. The data for these compounds were previously reported in the literature.<sup>9,10</sup>

### 9,10-diphenylanthracene (7)

**Physical Property:** White solid.

**Isolated Yield:** 30 %.

**TLC:**  $R_f$  = 0.79 (silica gel, ethyl acetate/hexane 1:4).

**<sup>1</sup>H NMR** (500 MHz, CDCl<sub>3</sub>)

$\delta$  7.72-7.68 (m, 4H), 7.63-7.53 (m, 6H), 7.51-7.47 (m, 4H), 7.35-7.31 (m, 4H).

### 1,4-diphenylphthalazine (2)

**Physical Property:** White solid.

**Isolated Yield:** 28 %.

**TLC:**  $R_f$  = 0.11 (silica gel, ethyl acetate/hexane 1:4).

**<sup>1</sup>H NMR** (500 MHz, CDCl<sub>3</sub>)

$\delta$  8.17-8.12 (m, 4H), 7.87-7.79 (m, 6H), 7.62-7.54 (m, 6H).

## References

- 1 J. Yang, M. R. Karver, W. Li, S. Sahu and N. K. Devaraj, *Angew. Chem.* 2012, *Angew. Chem. Int. Ed.* **2012**, 51, 5222–5225.
- 2 R. A. Carboni and R. V. Lindsey, Jr., *J. Am. Chem. Soc.* **1959**, 81, 4342–4346.
- 3 W. Skorianetz and E. Sz. Kováts, *Helv. Chim. Acta* **1971**, 54, 1922–1939.
- 4 A. Counotte-Potman, H. C. van der Plas and B. van Veldhuizen, *J. Org. Chem.* **1981**, 46, 2138–2141.
- 5 S. J. Weininger E. R. Thornton, *J. Am. Chem. Soc.* **1967**, 89, 2050–2054.
- 6 W. X. Hu and F. Xu, *J. Heterocycl. Chem.* **2008**, 45, 1745–1750.
- 7 A. T. Biju and F. Glorius, *Angew. Chem. Int. Ed.* **2010**, 49, 9761–9764.
- 8 D. Bhattacharjee and F. D. Popp, *J. Heterocycl. Chem.* **1980**, 17, 433–437
- 9 E. Yagodkin and C. J. Douglas, *Tetrahedron Lett.* **2010**, 51, 3037–3040.
- 10 J. Li, J. Gao, W.-W. Xiong and Q. Zhang, *Tetrahedron Lett.* **2014**, 55, 4346–4349.

$^1\text{H}$  NMR spectrum of **2** in  $\text{CDCl}_3$  (500 MHz).

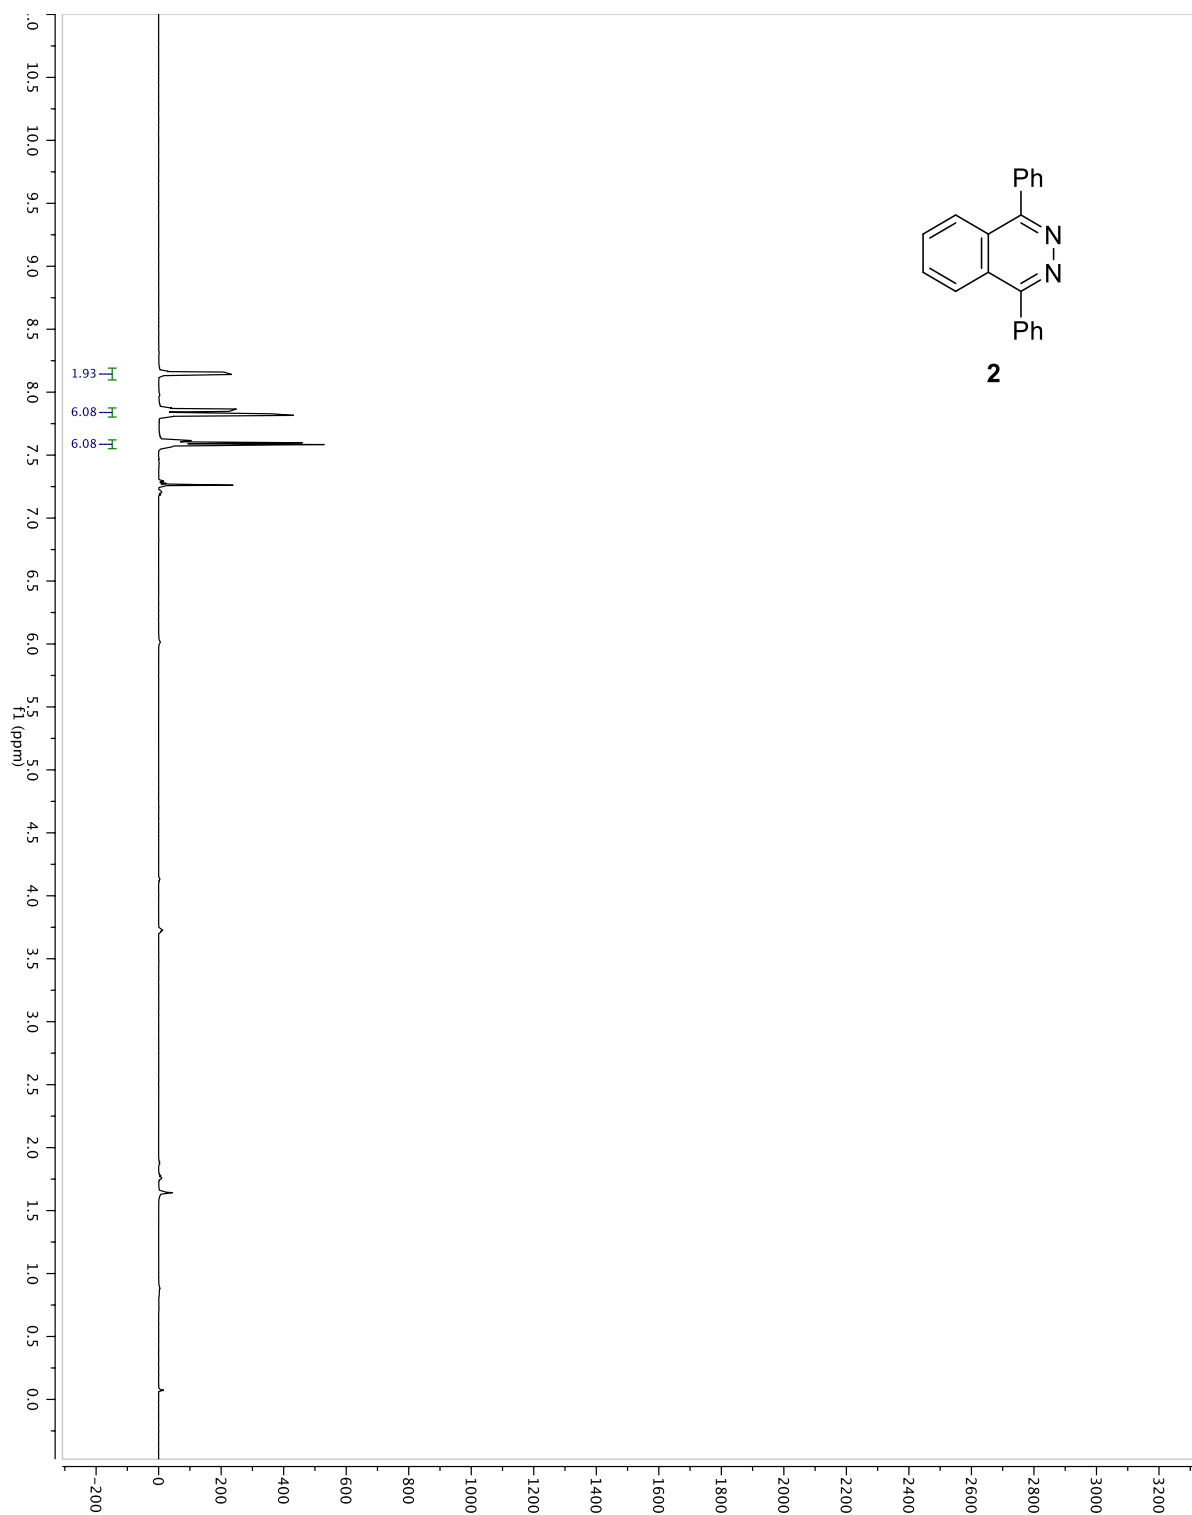

$^1\text{H}$  NMR spectrum of **3a** in  $\text{CDCl}_3$  (500 MHz).

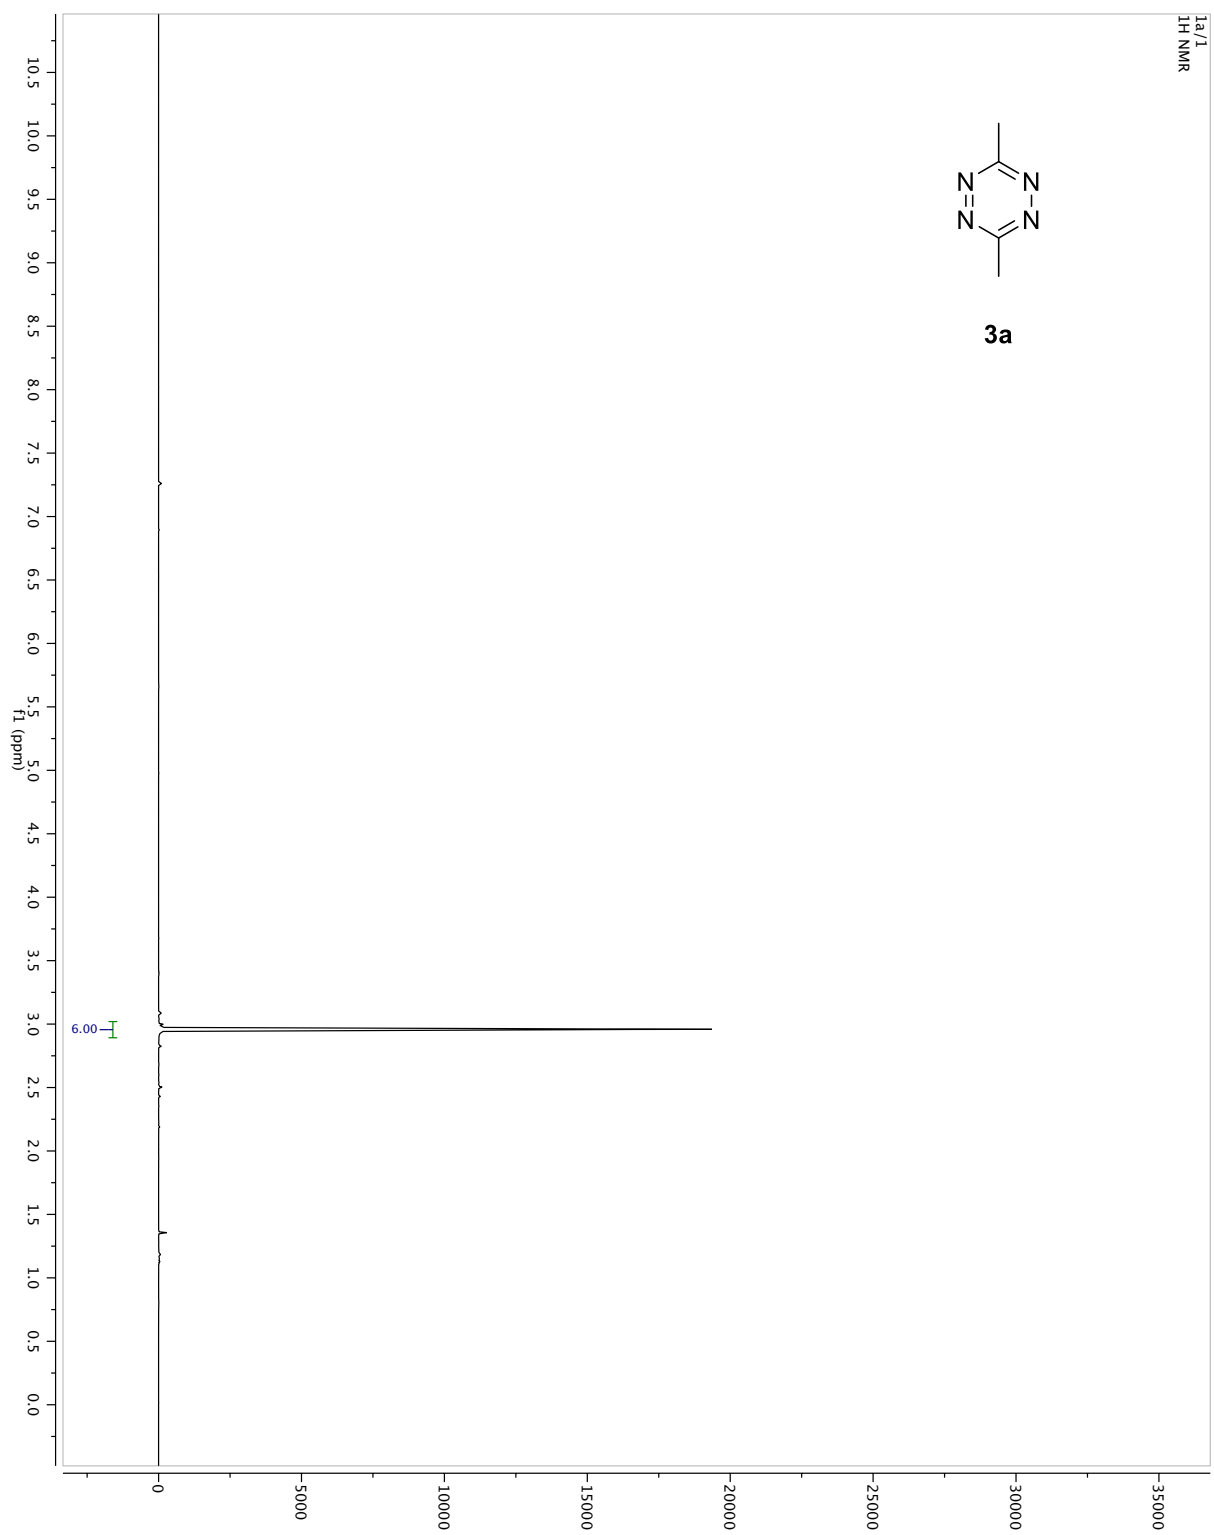

$^{13}\text{C}$  NMR spectrum of **3a** in  $\text{CDCl}_3$  (125 MHz).

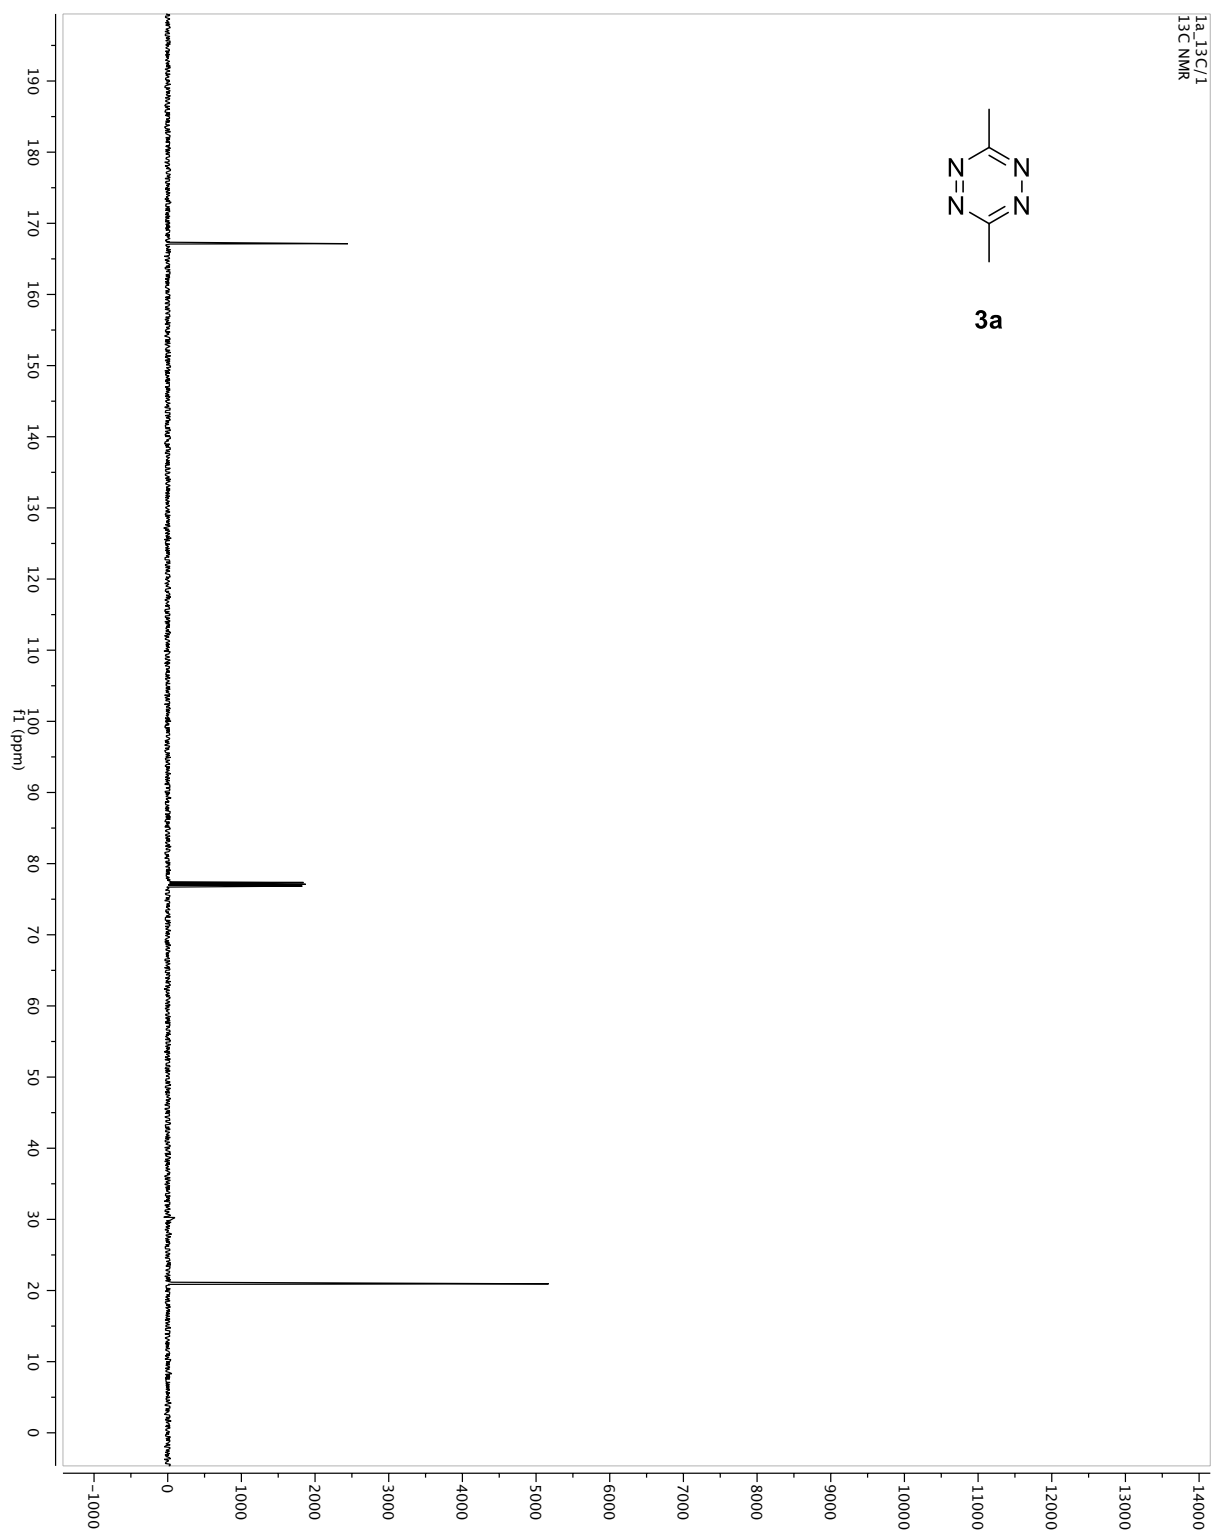

$^1\text{H}$  NMR spectrum of **3b** in  $\text{CDCl}_3$  (500 MHz).

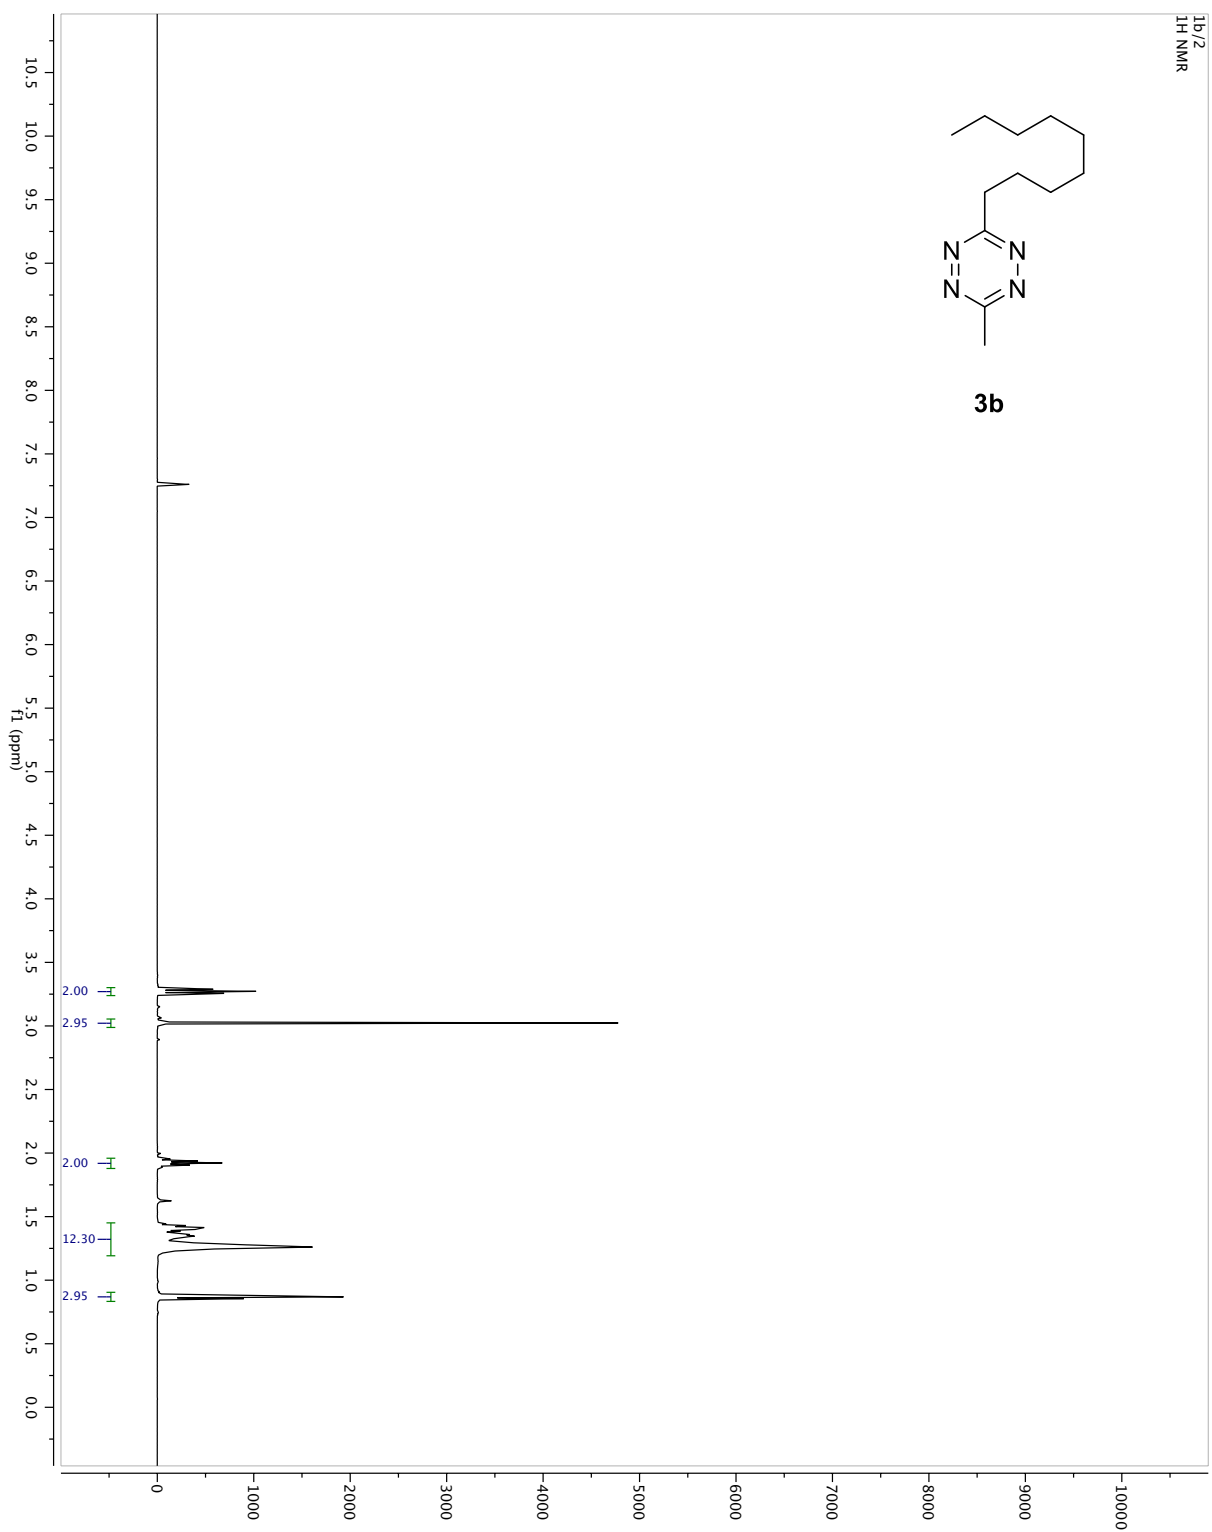

$^{13}\text{C}$  NMR spectrum of **3b** in  $\text{CDCl}_3$  (125 MHz).

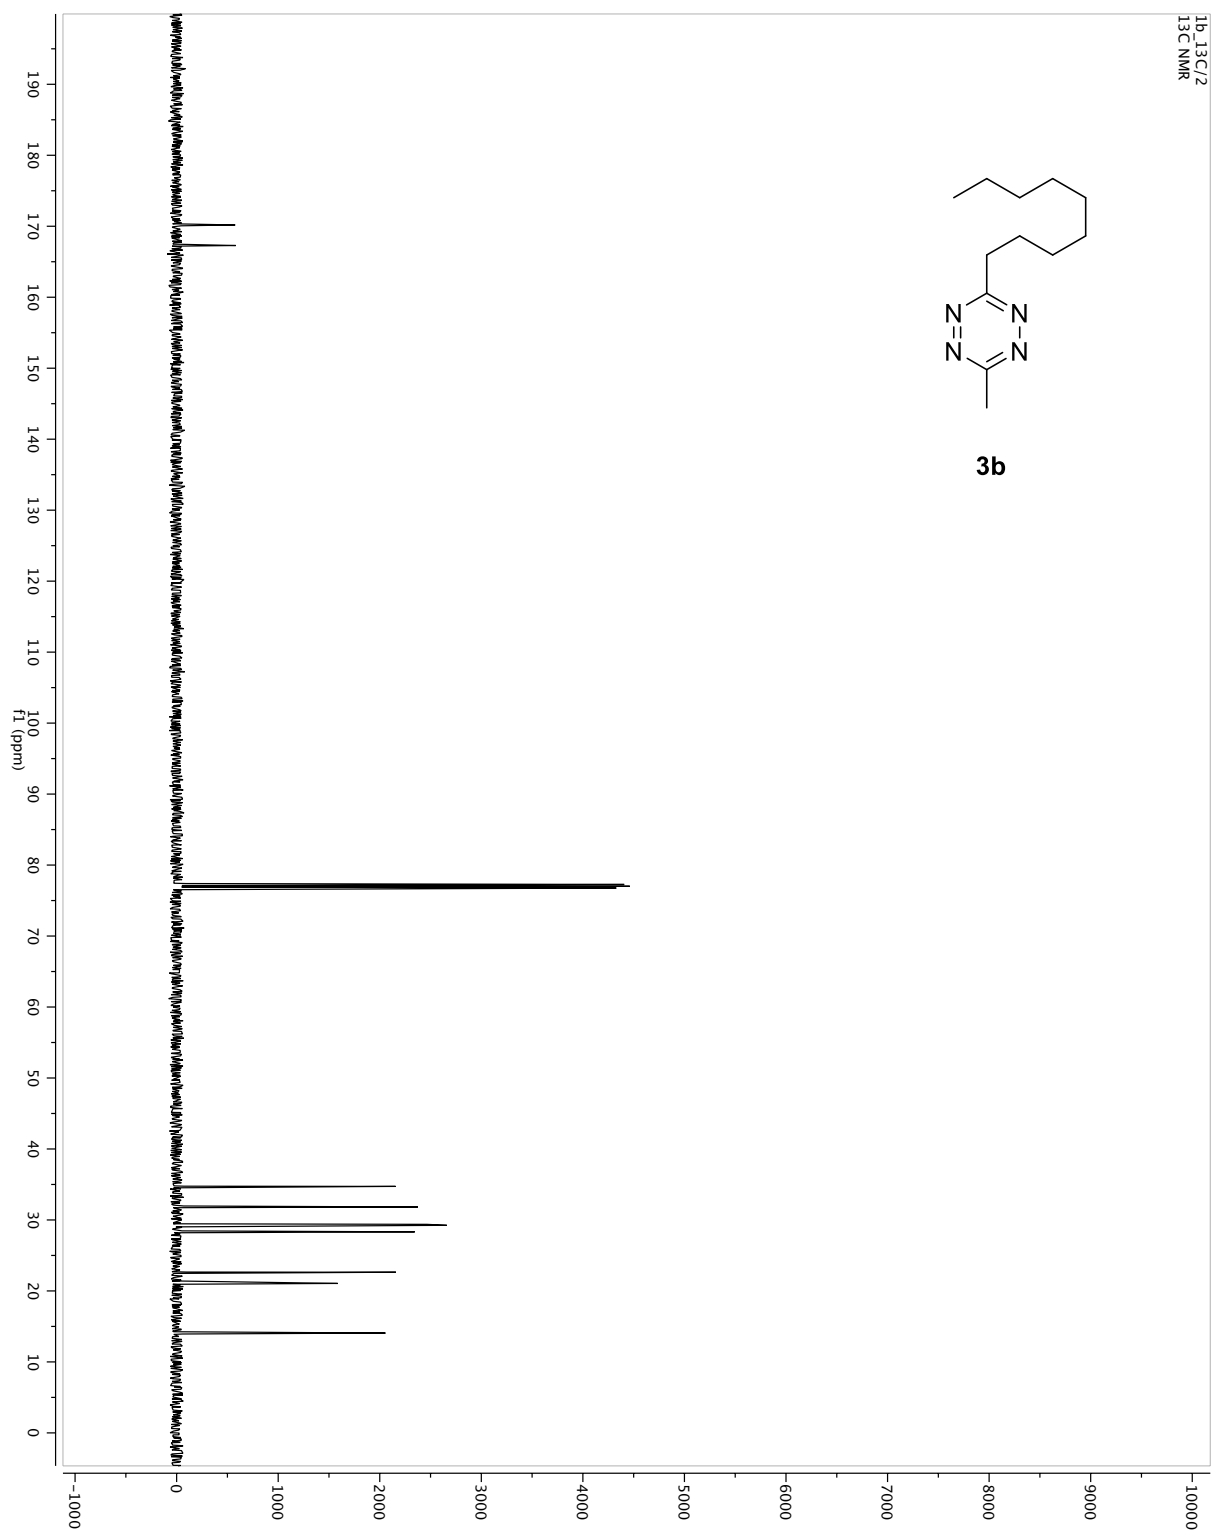

$^1\text{H}$  NMR spectrum of **3c** in  $\text{CDCl}_3$  (500 MHz).

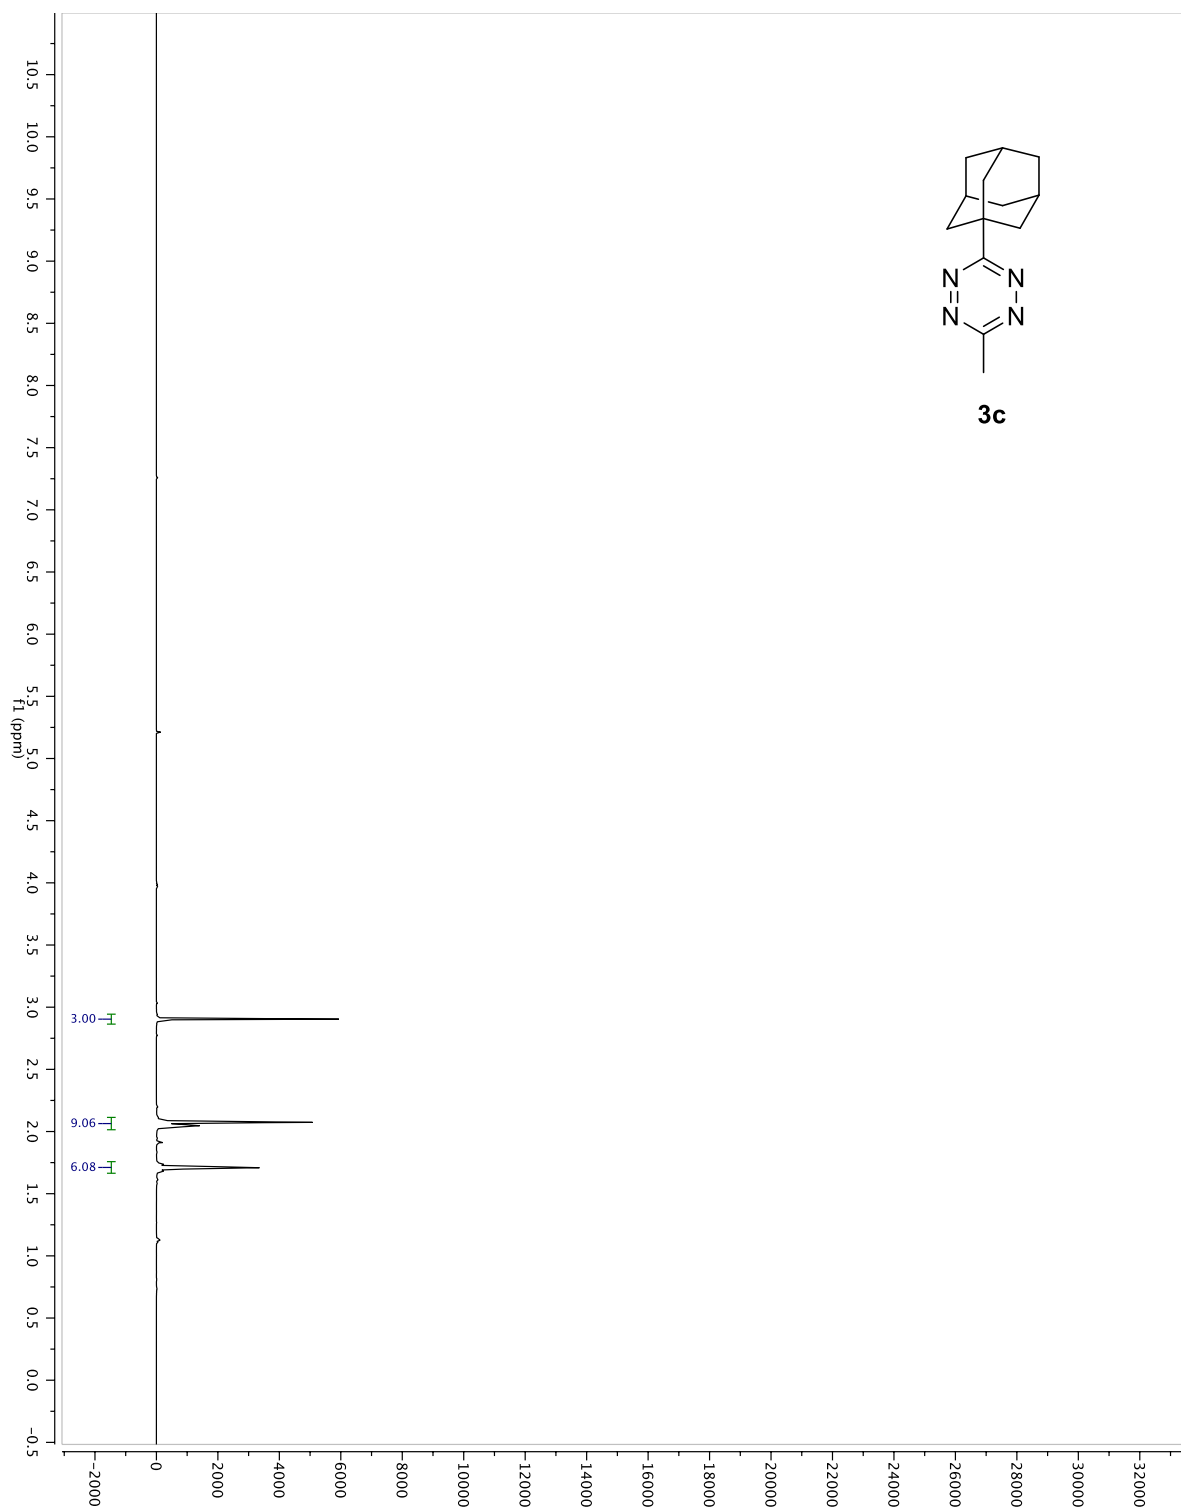



$^{13}\text{C}$  NMR spectrum of **3c** in  $\text{CDCl}_3$  (125 MHz).

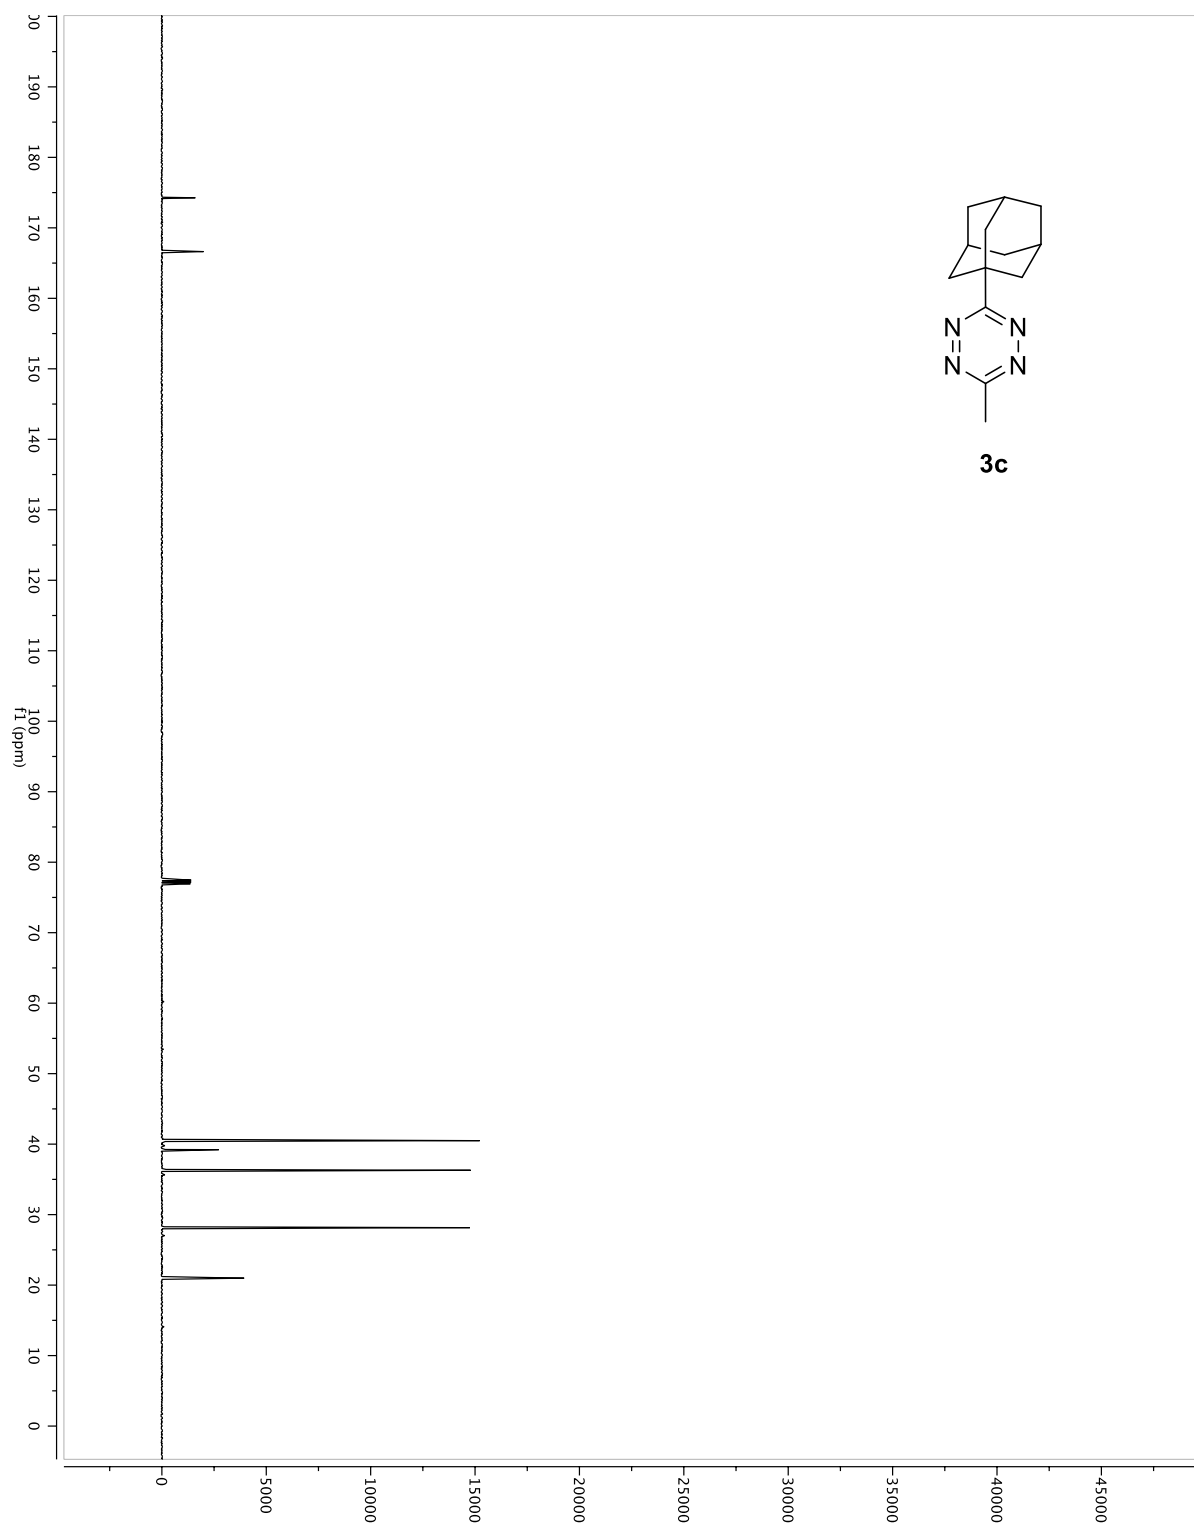

$^1\text{H}$  NMR spectrum of **3d** in  $\text{CDCl}_3$  (500 MHz).

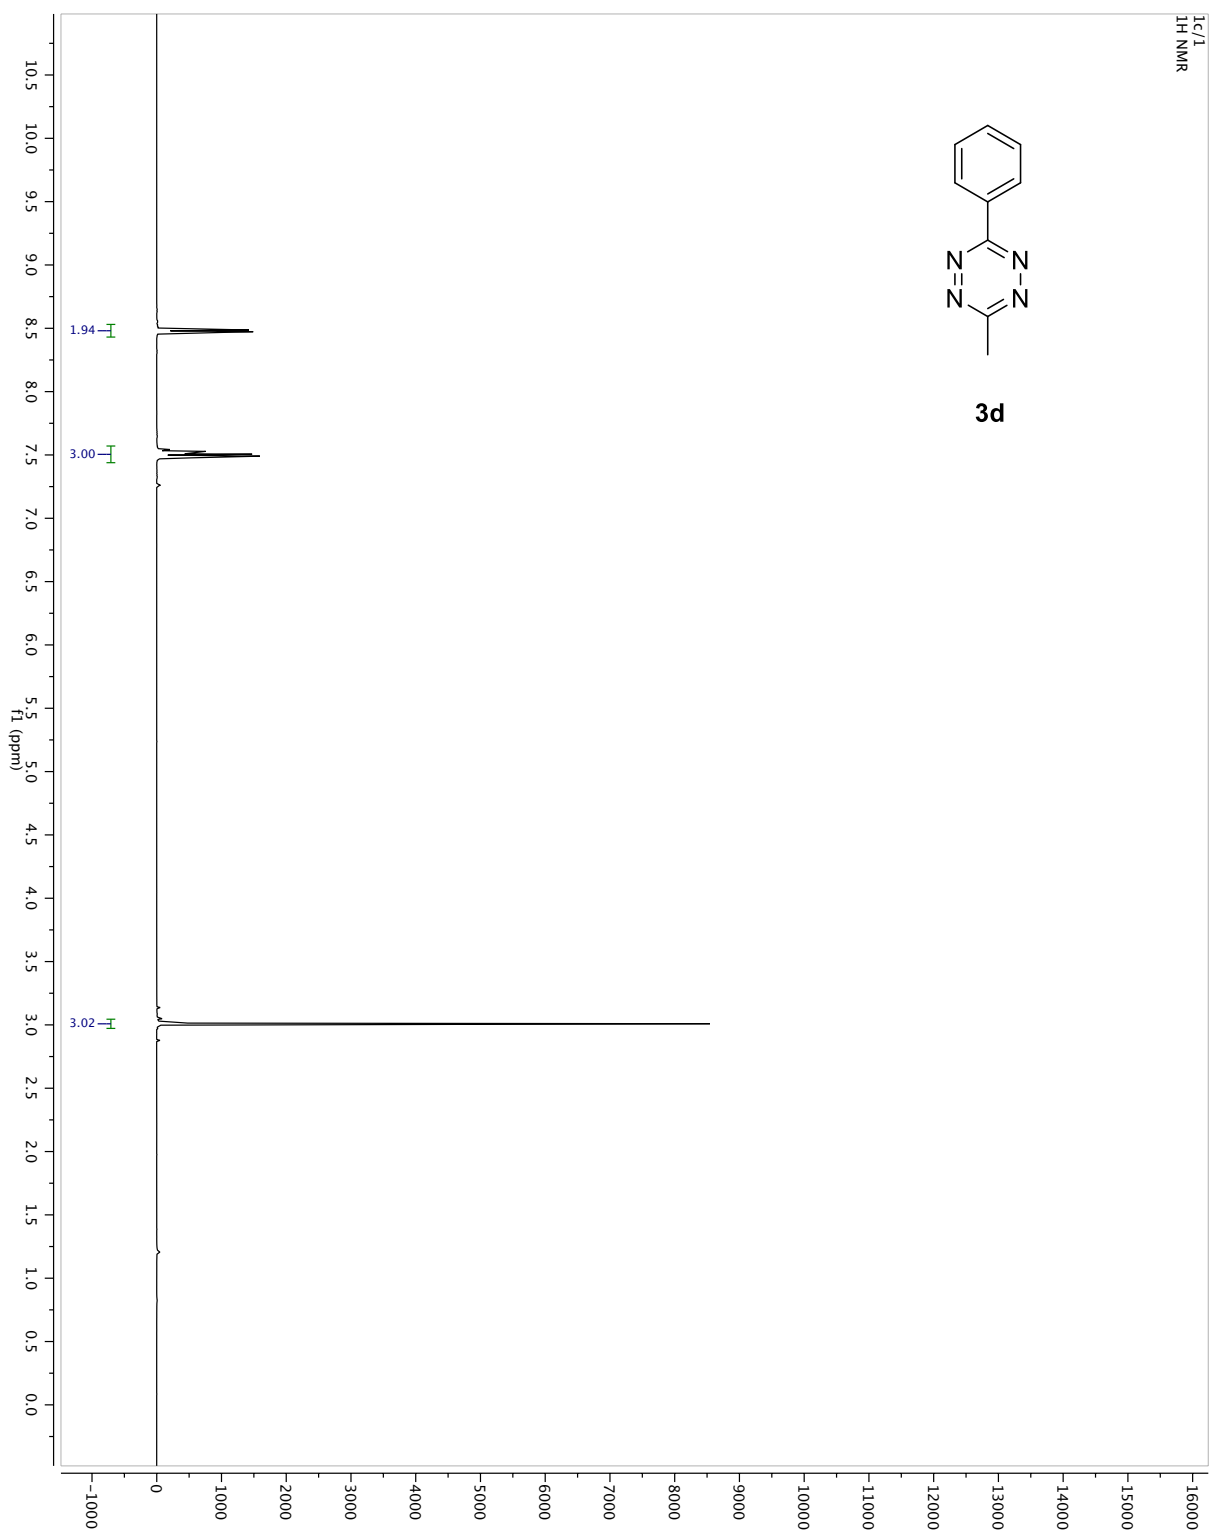

$^{13}\text{C}$  NMR spectrum of **3d** in  $\text{CDCl}_3$  (125 MHz).

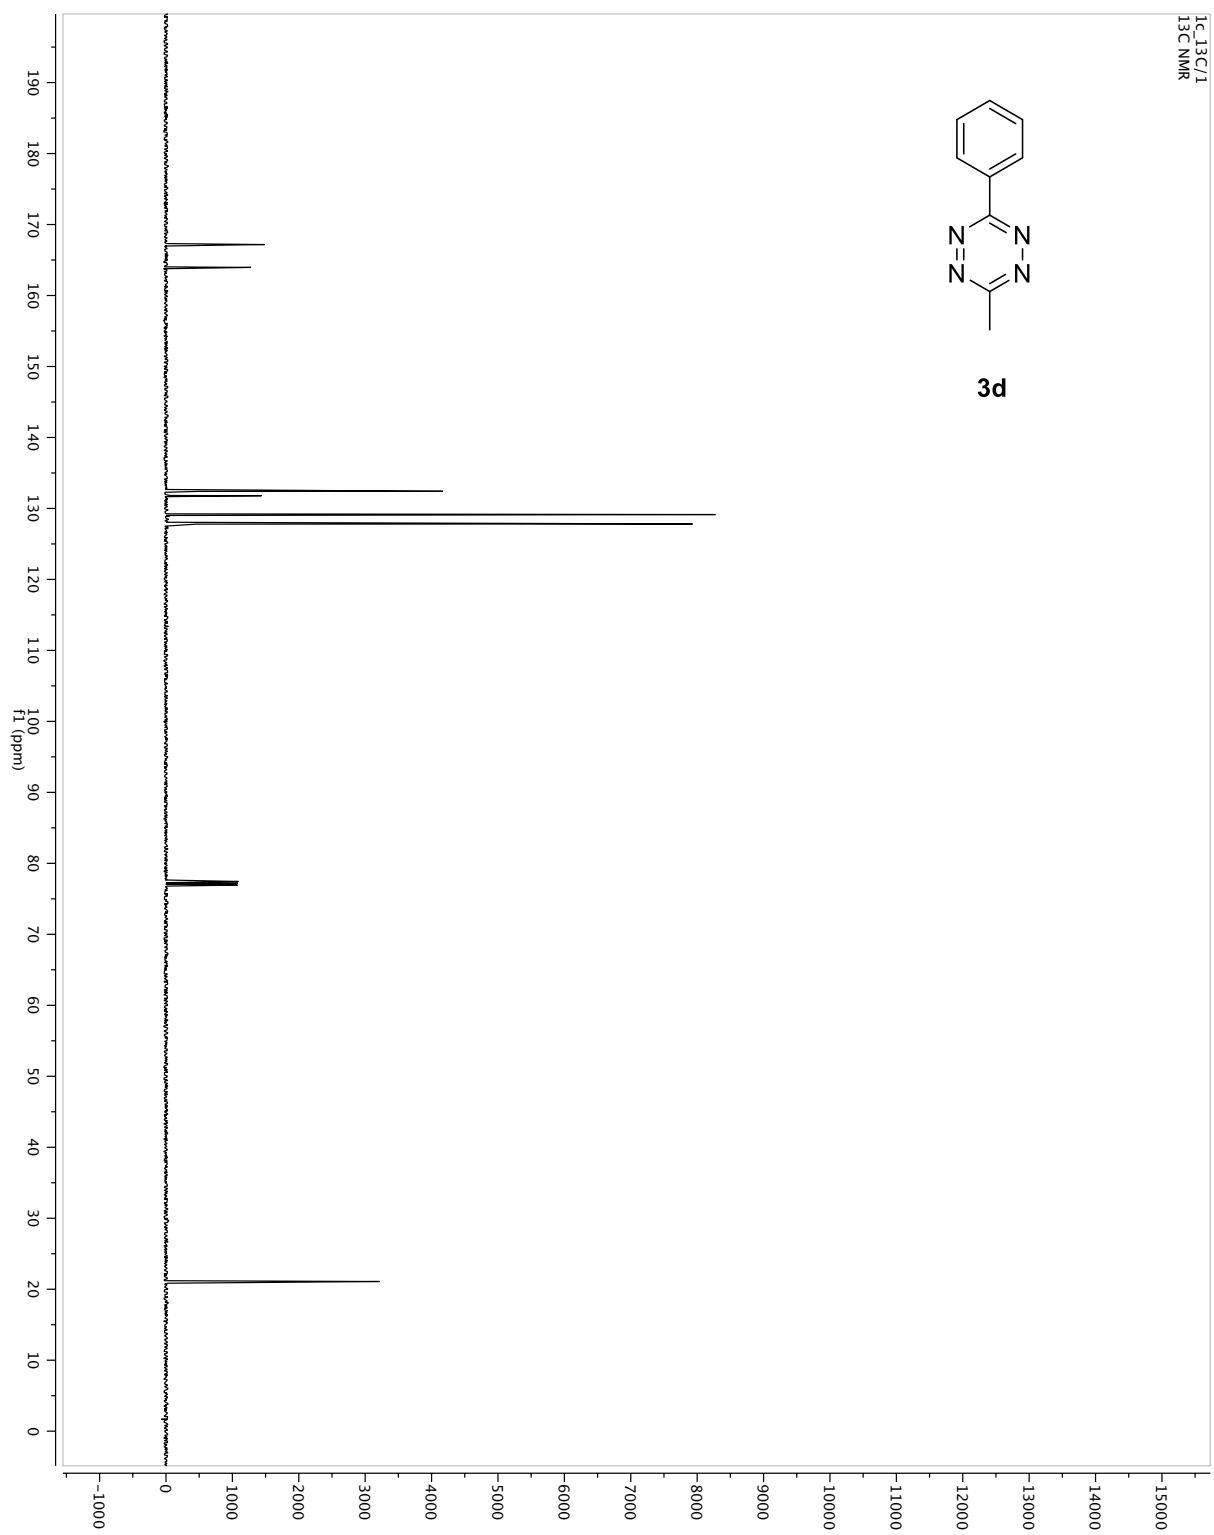

$^1\text{H}$  NMR spectrum of **3e** in  $\text{CDCl}_3$  (500 MHz).

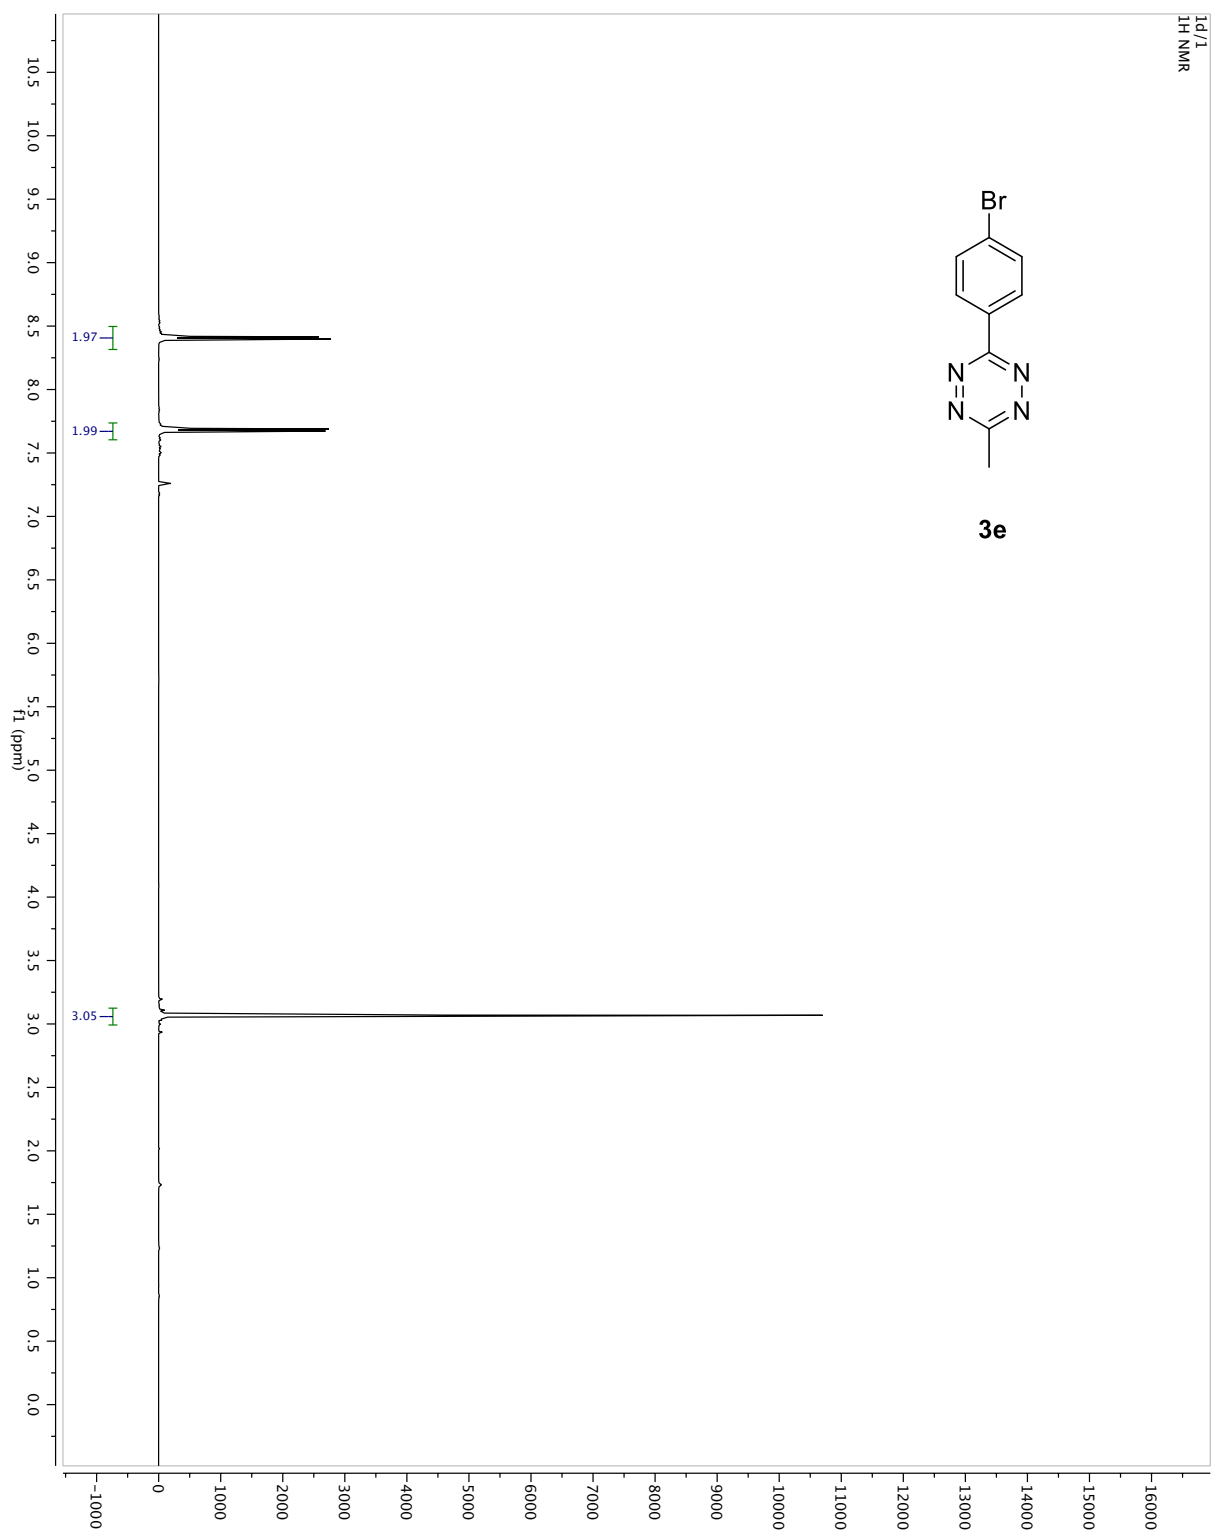

$^{13}\text{C}$  NMR spectrum of **3e** in  $\text{CDCl}_3$  (125 MHz).

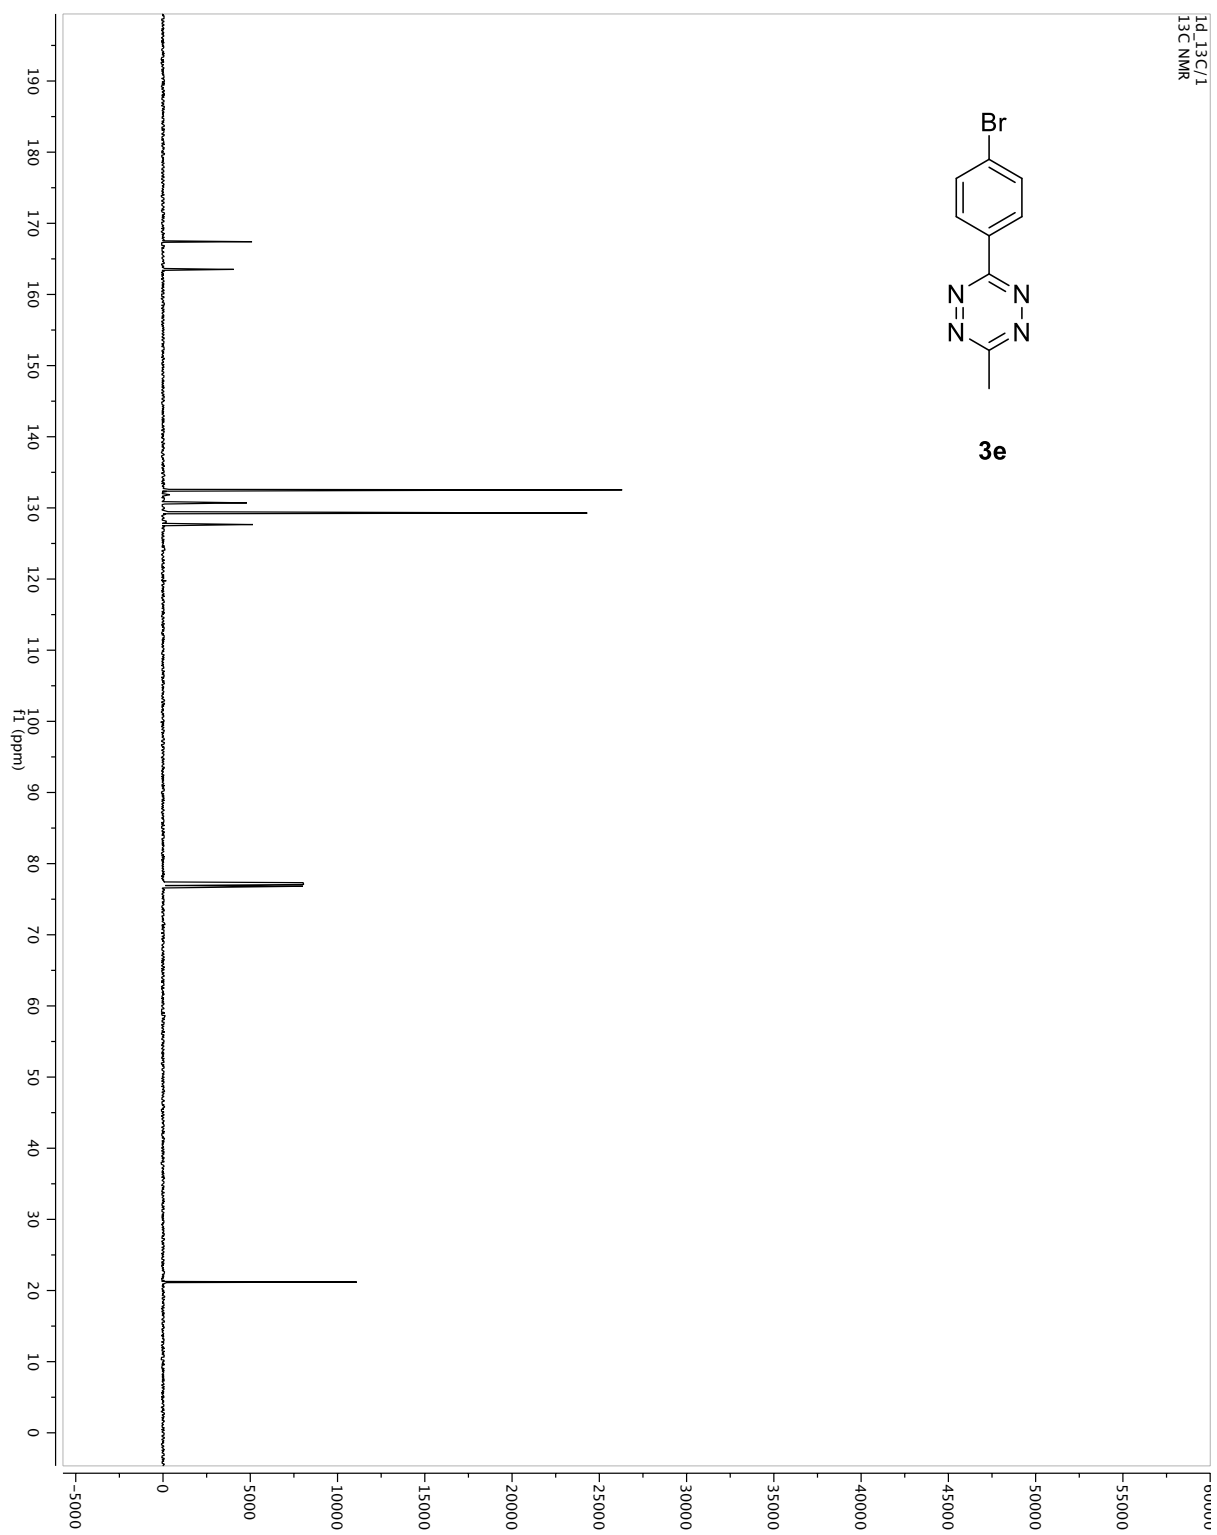

$^1\text{H}$  NMR spectrum of **3f** in  $\text{CDCl}_3$  (500 MHz).

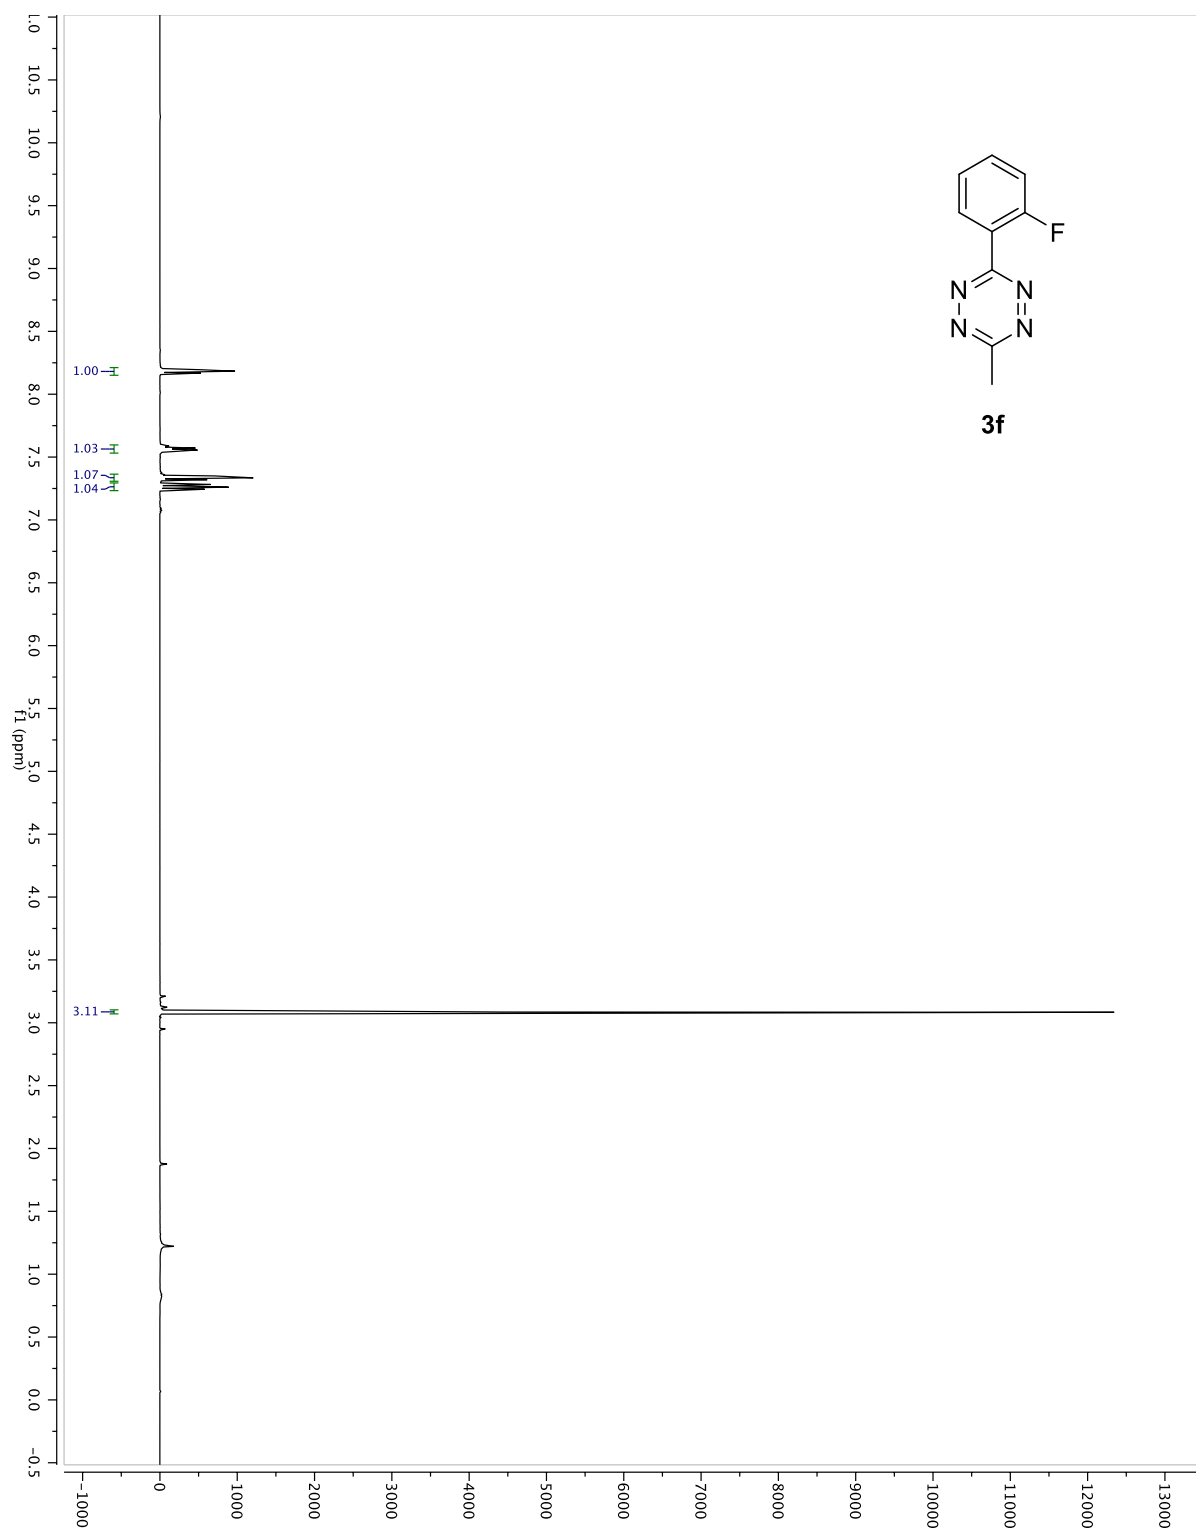

$^{13}\text{C}$  NMR spectrum of **3f** in  $\text{CDCl}_3$  (125 MHz).

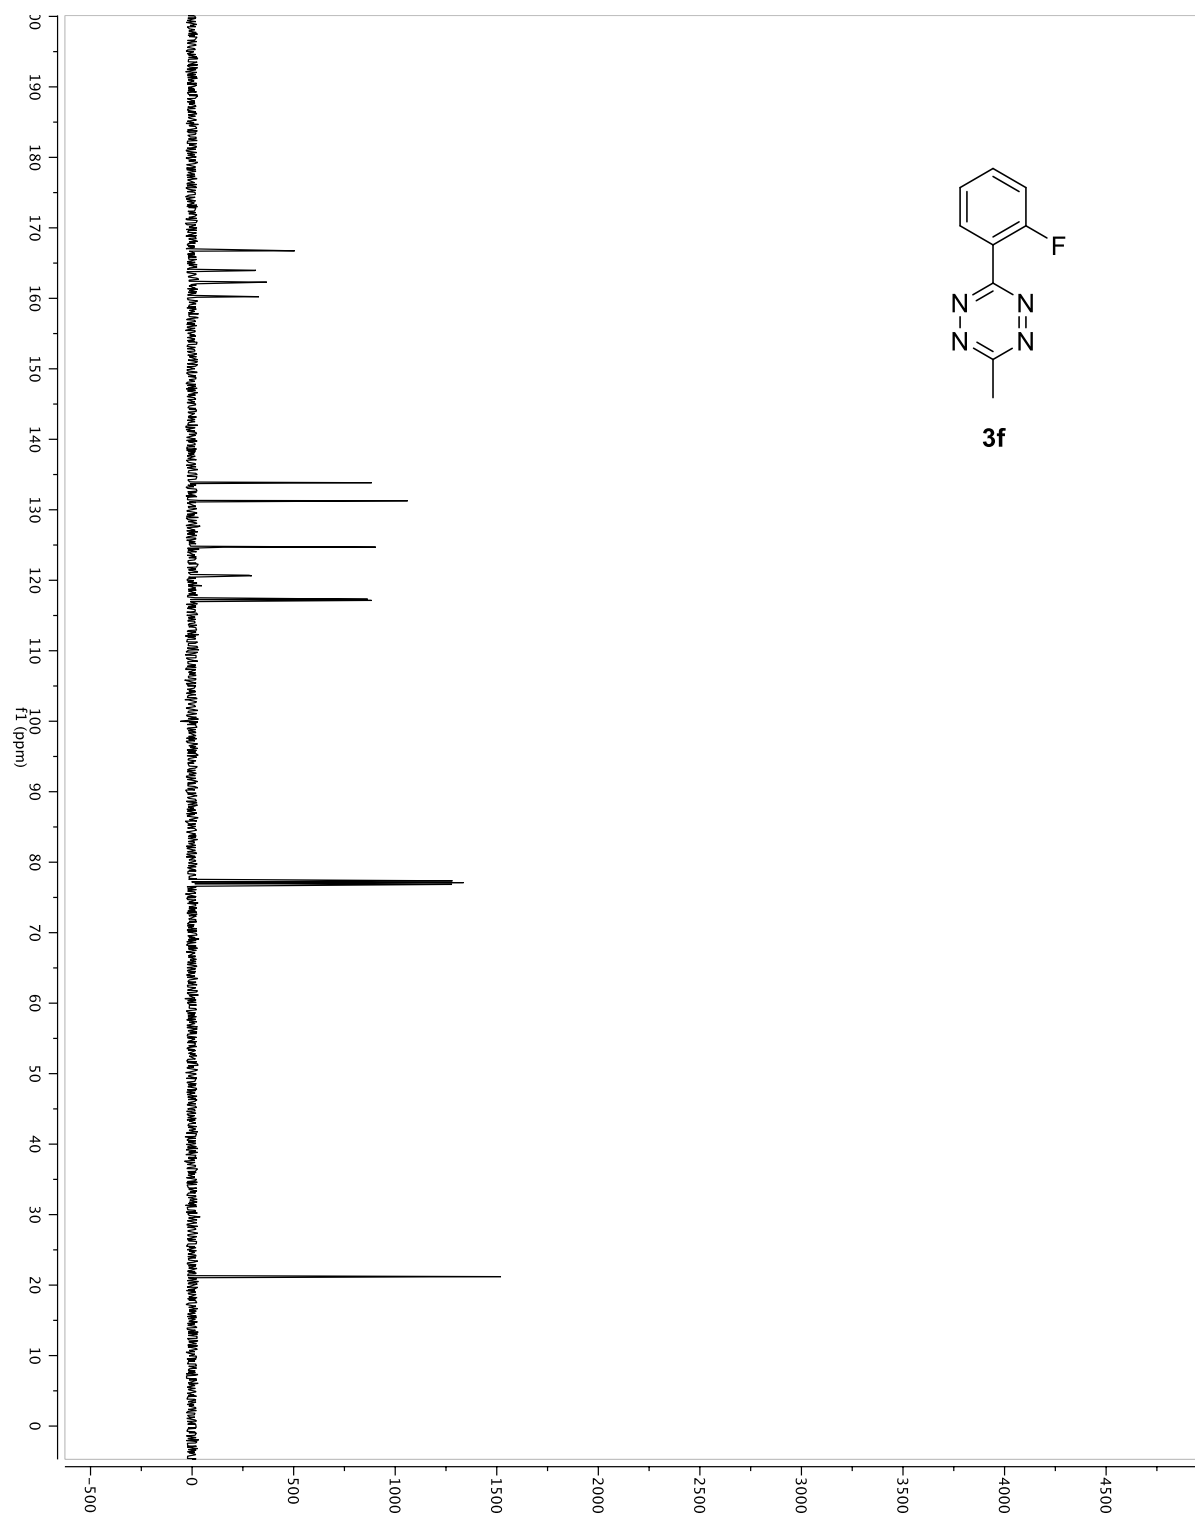

$^{19}\text{F}$  NMR spectrum of **3f** in  $\text{CDCl}_3$  (338 MHz).

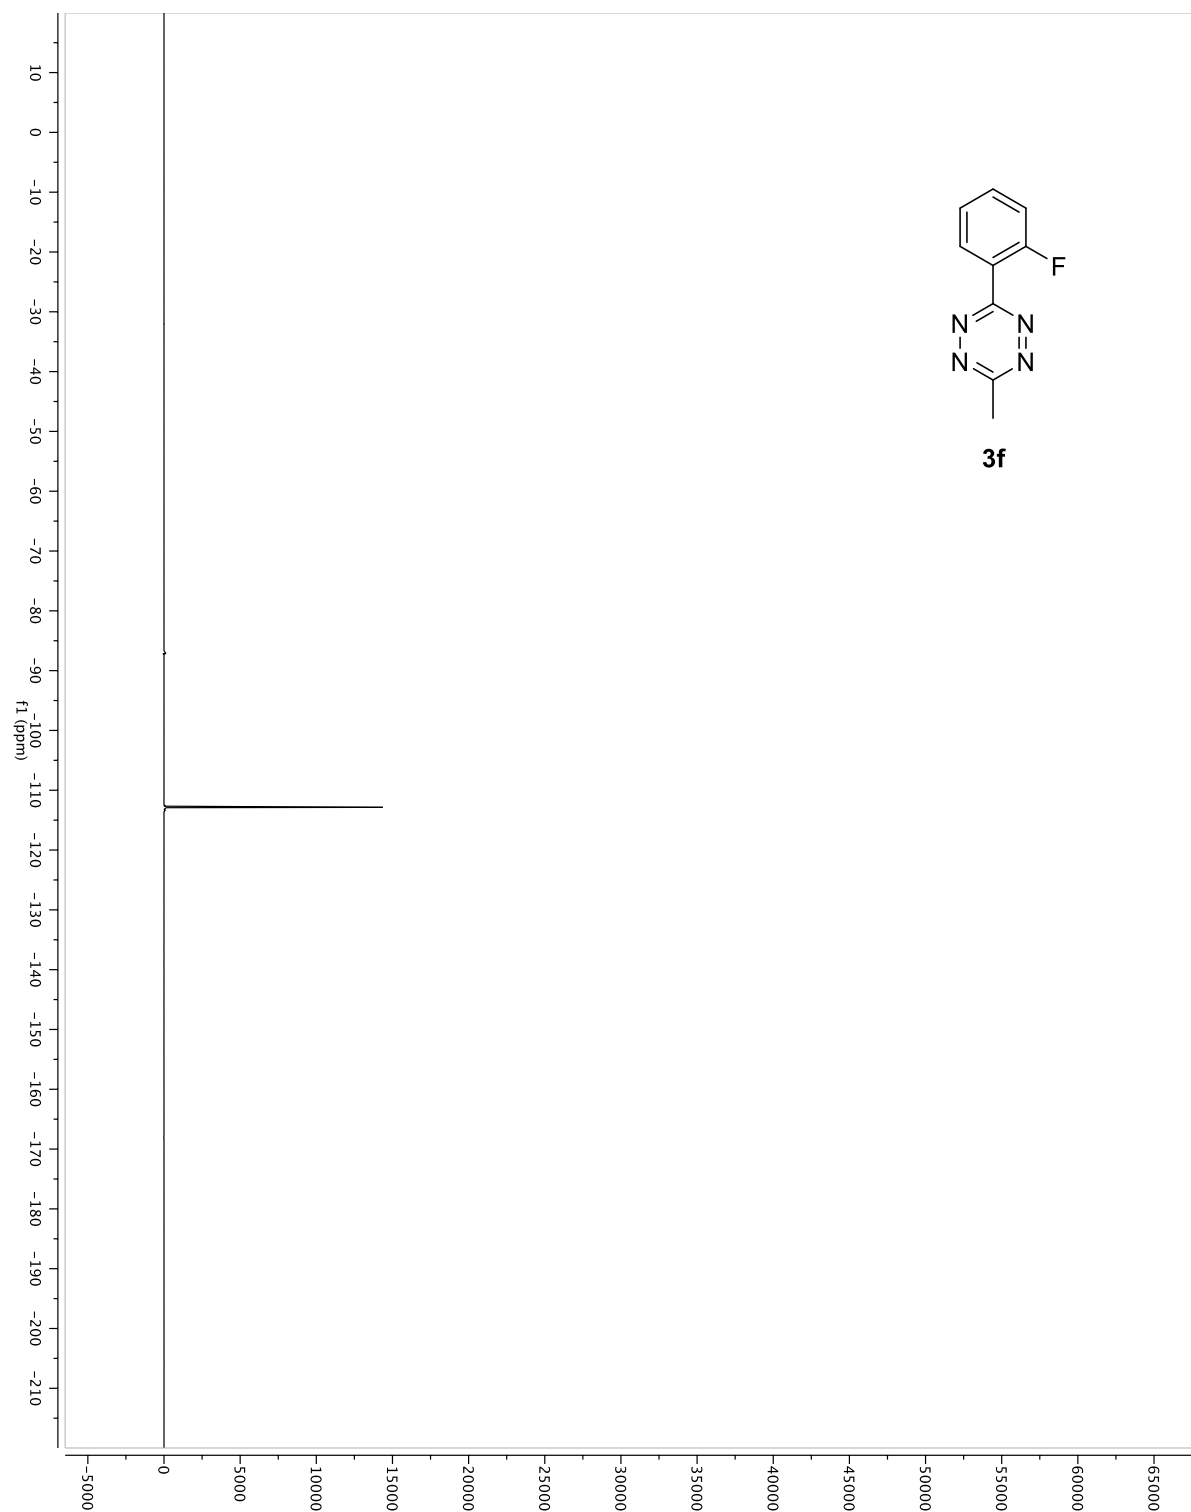



$^1\text{H}$  NMR spectrum of **3g** in  $\text{CDCl}_3$  (500 MHz).

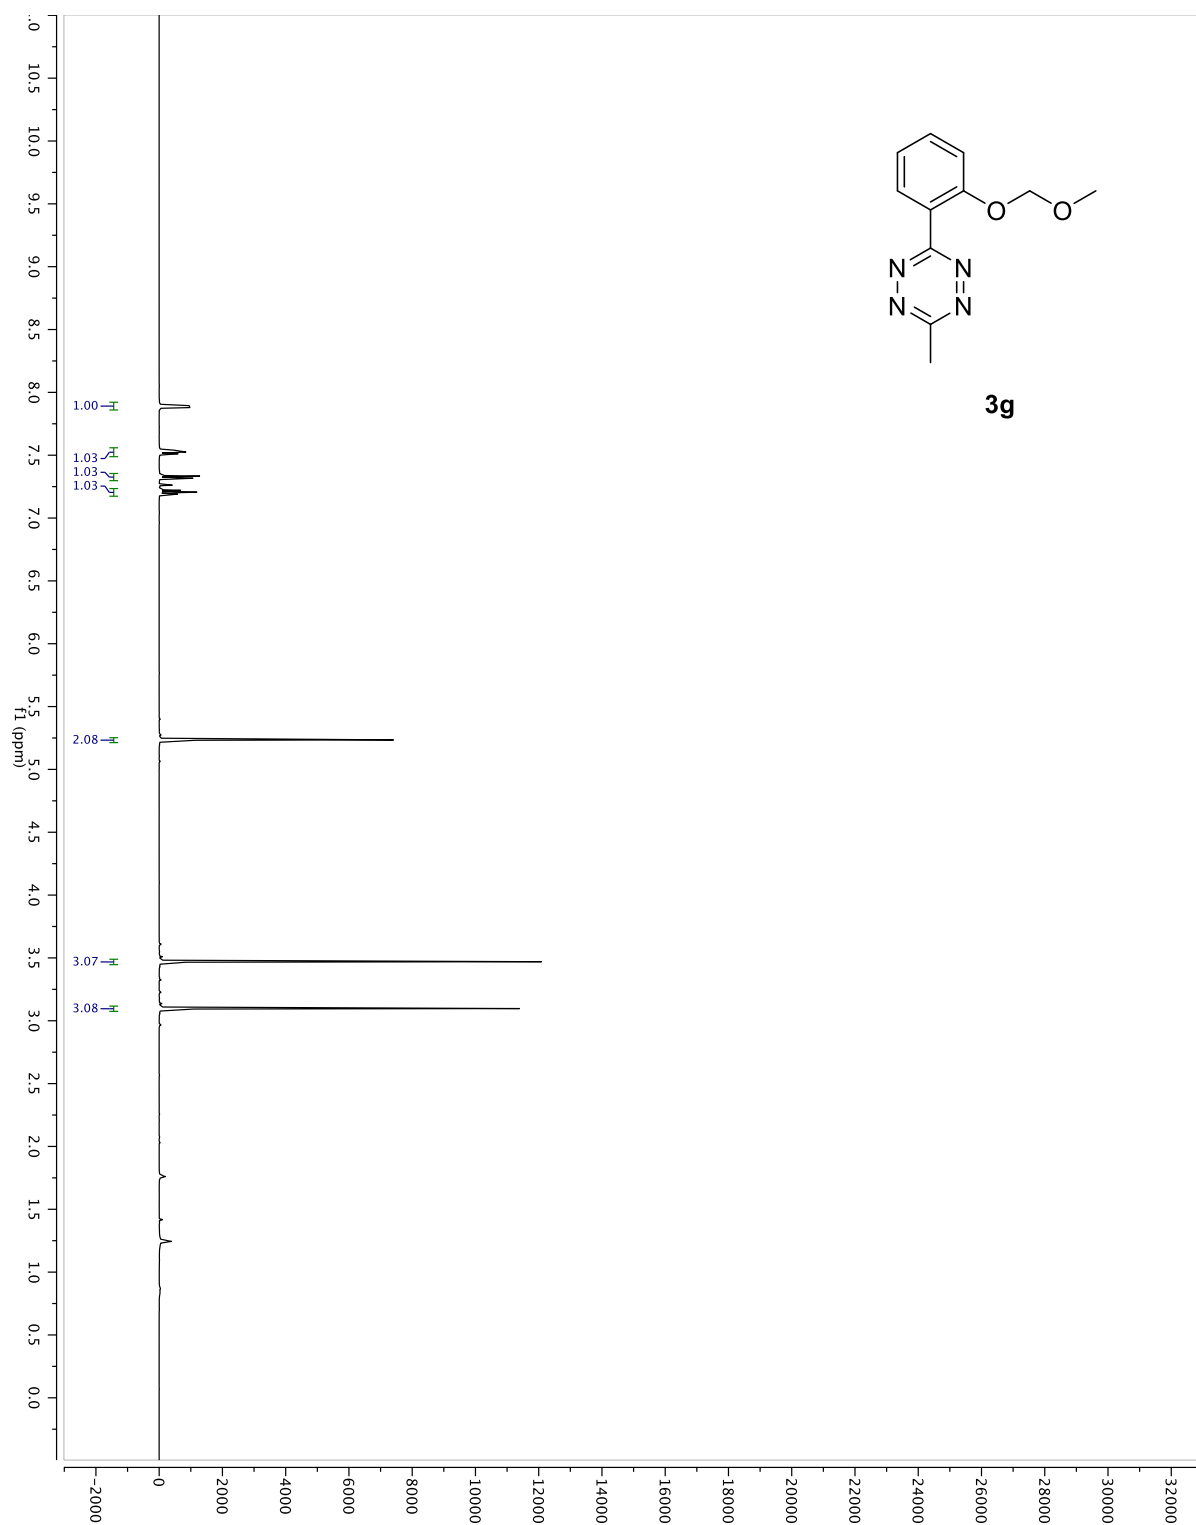

$^{13}\text{C}$  NMR spectrum of **3g** in  $\text{CDCl}_3$  (125 MHz).

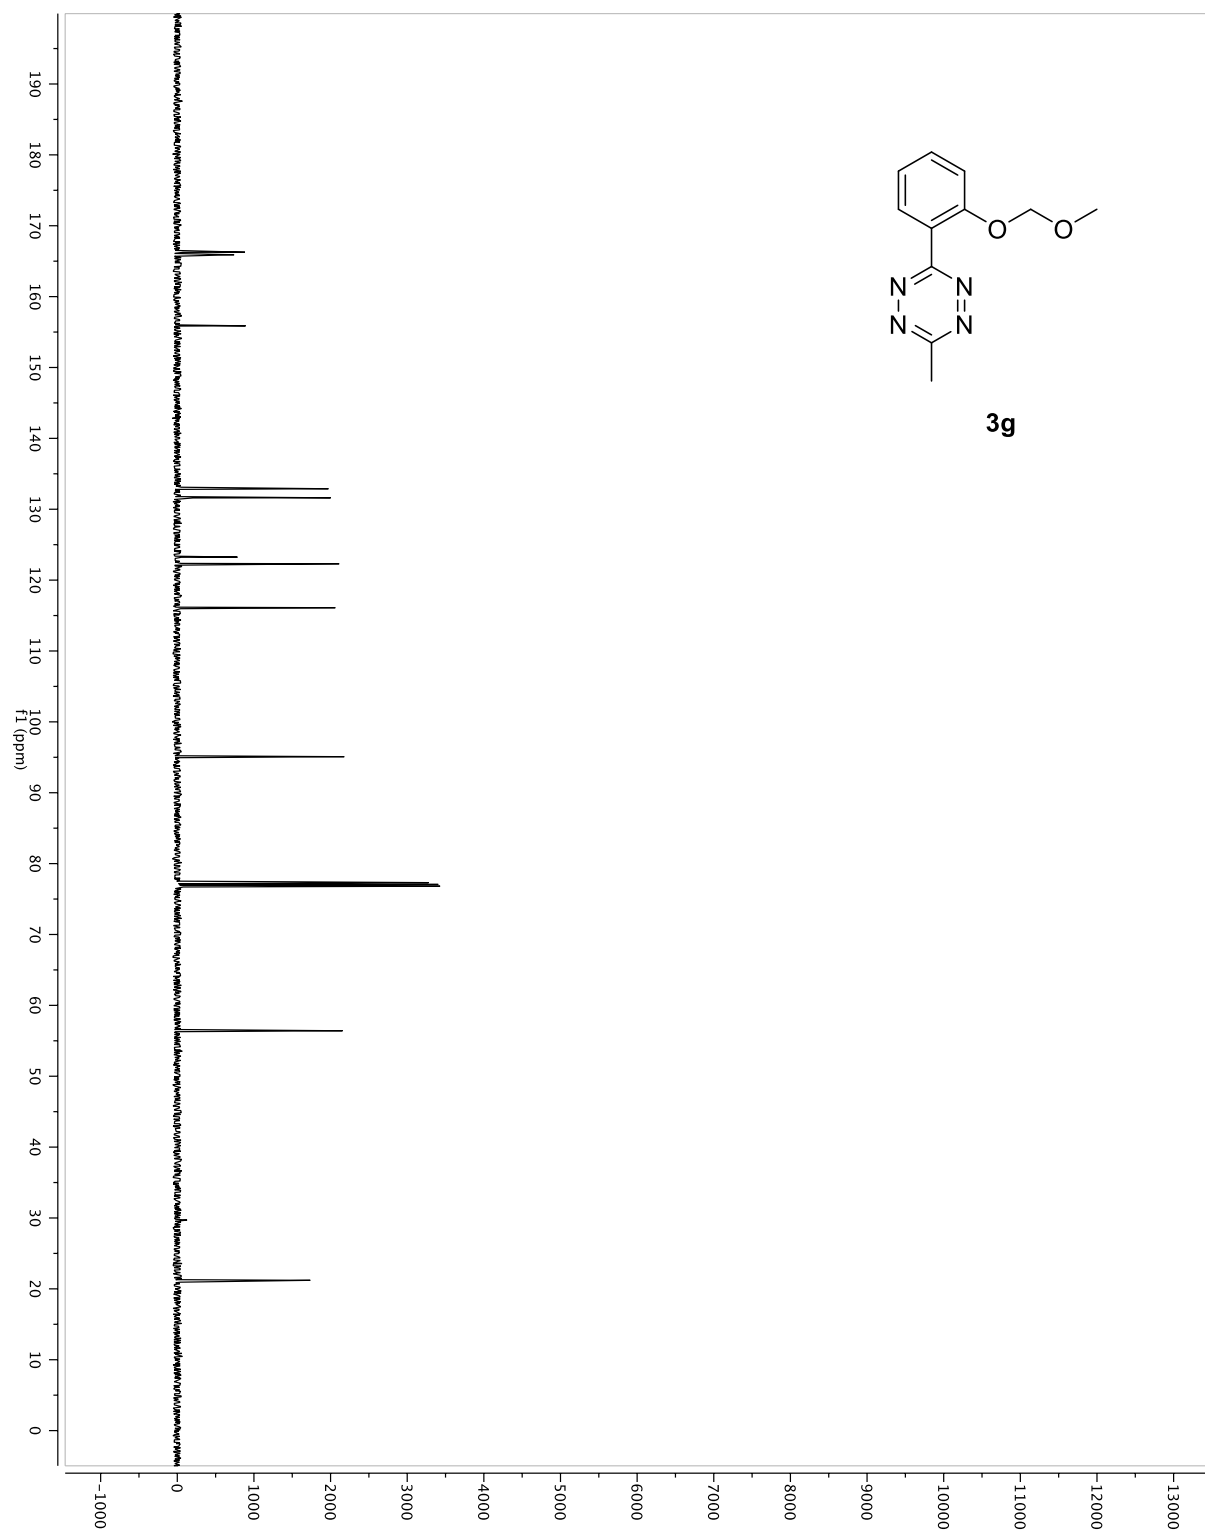

$^1\text{H}$  NMR spectrum of **3h** in  $\text{CDCl}_3$  (500 MHz).

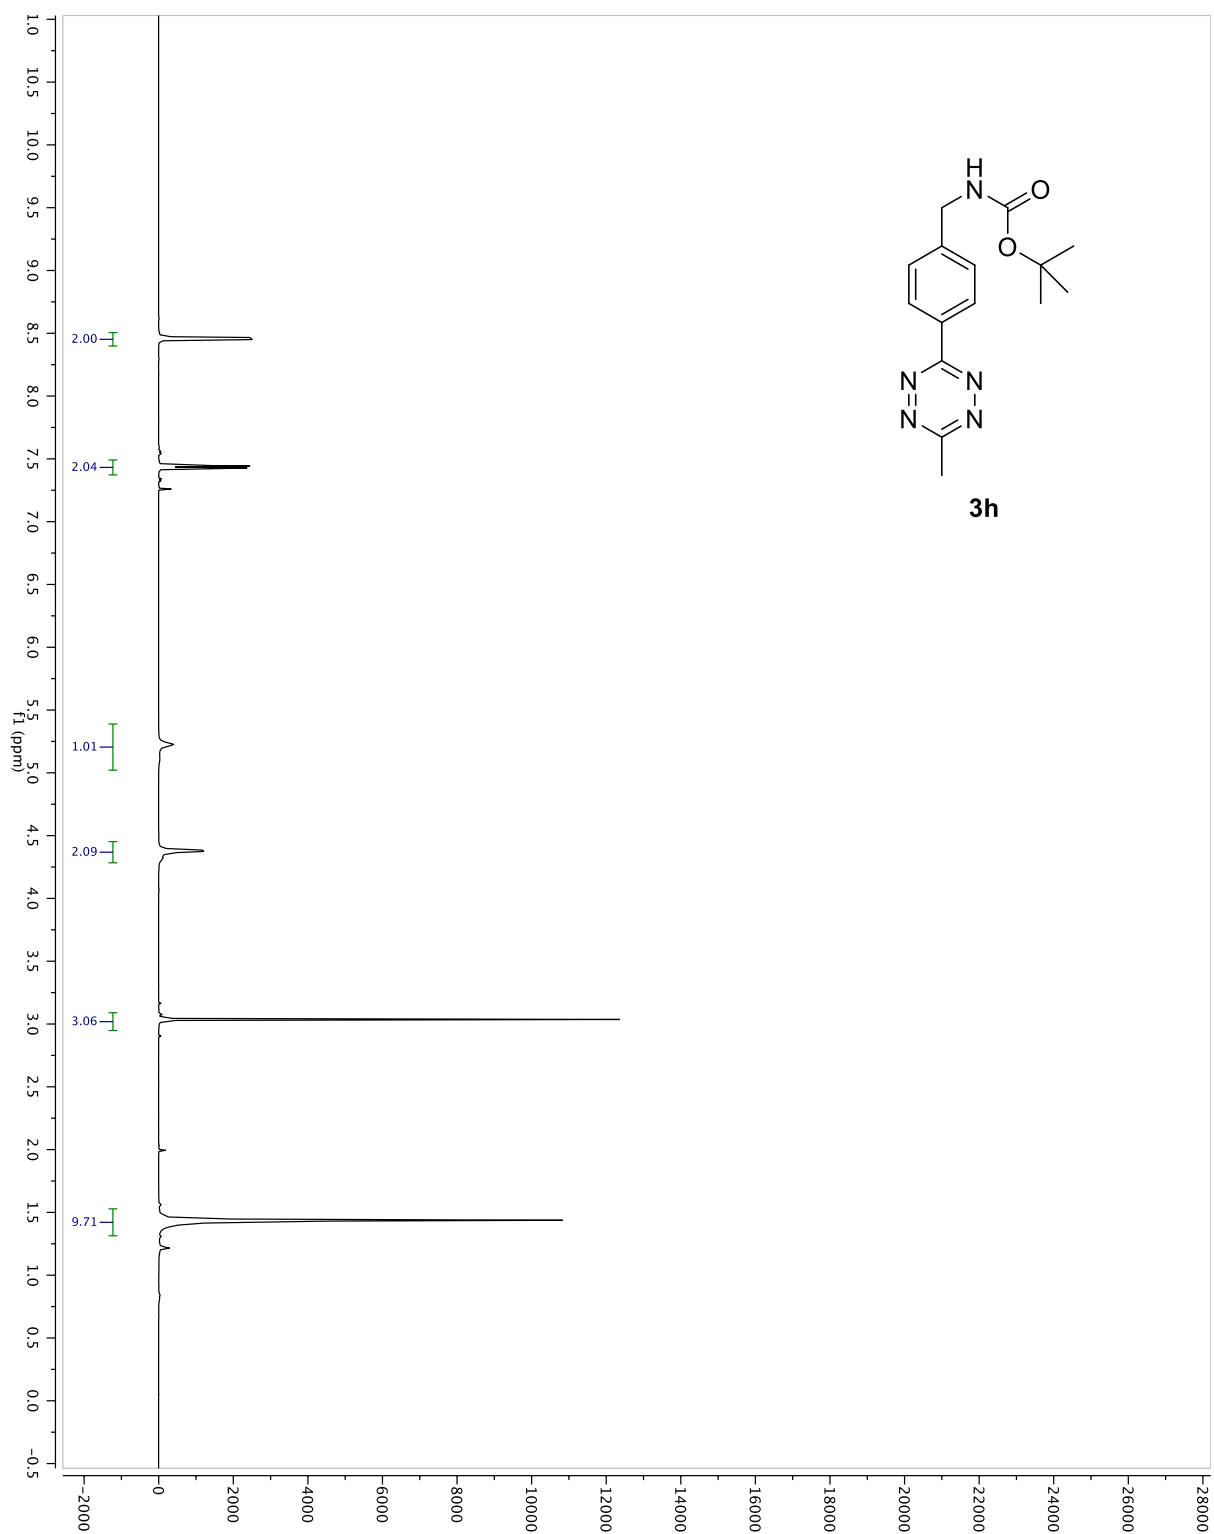

$^1\text{H}$  NMR spectrum of **3i** in  $\text{CDCl}_3$  (500 MHz).

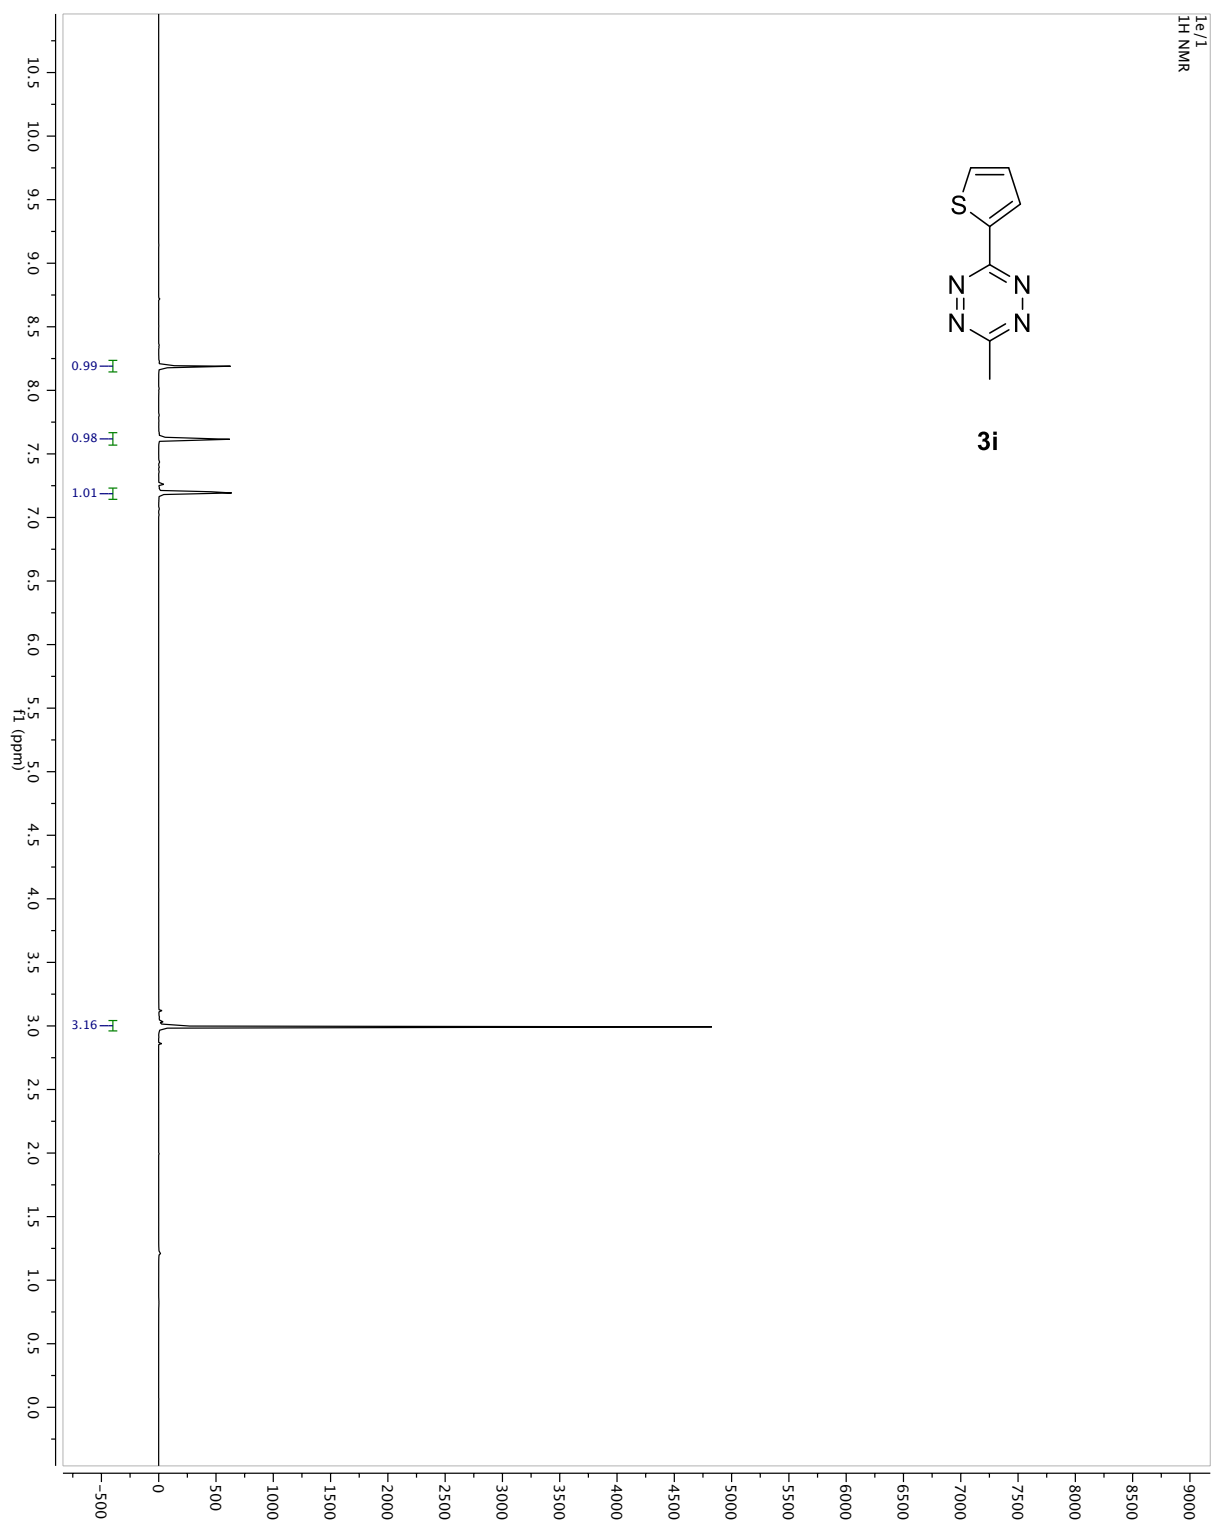

$^{13}\text{C}$  NMR spectrum of **3i** in  $\text{CDCl}_3$  (125 MHz).

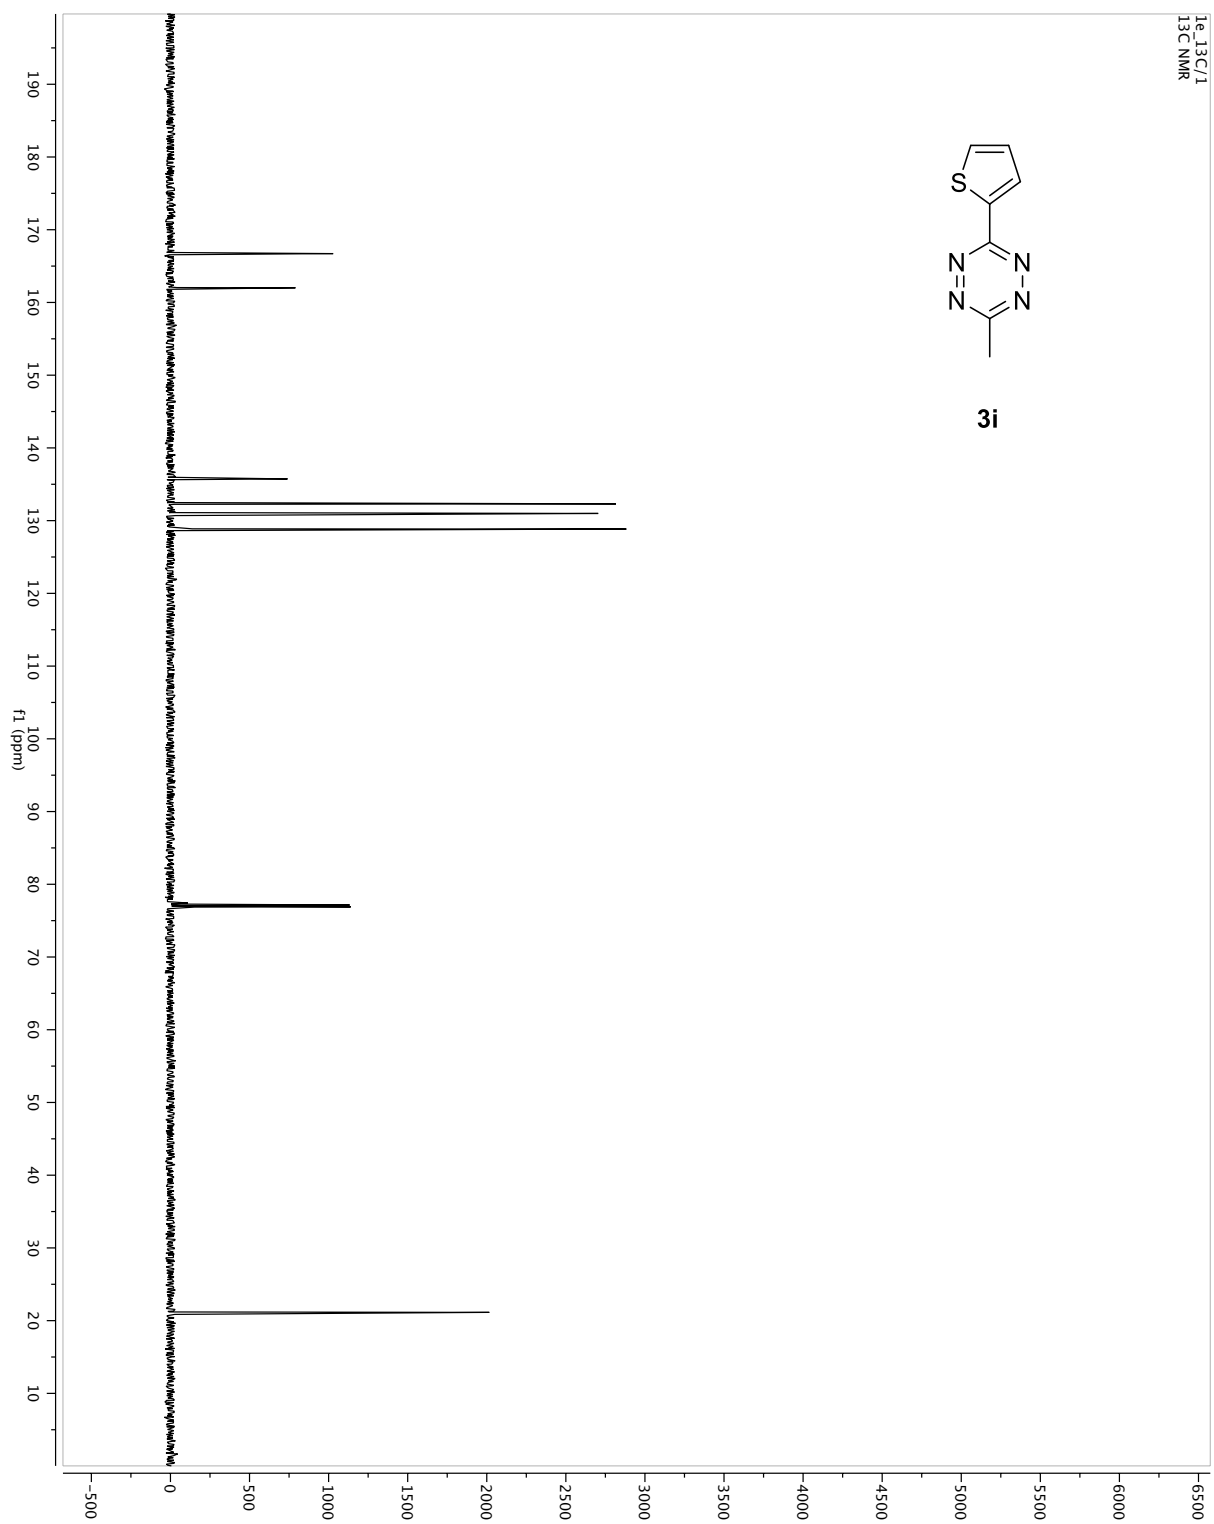

$^1\text{H}$  NMR spectrum of **3j** in  $\text{CDCl}_3$  (500 MHz).

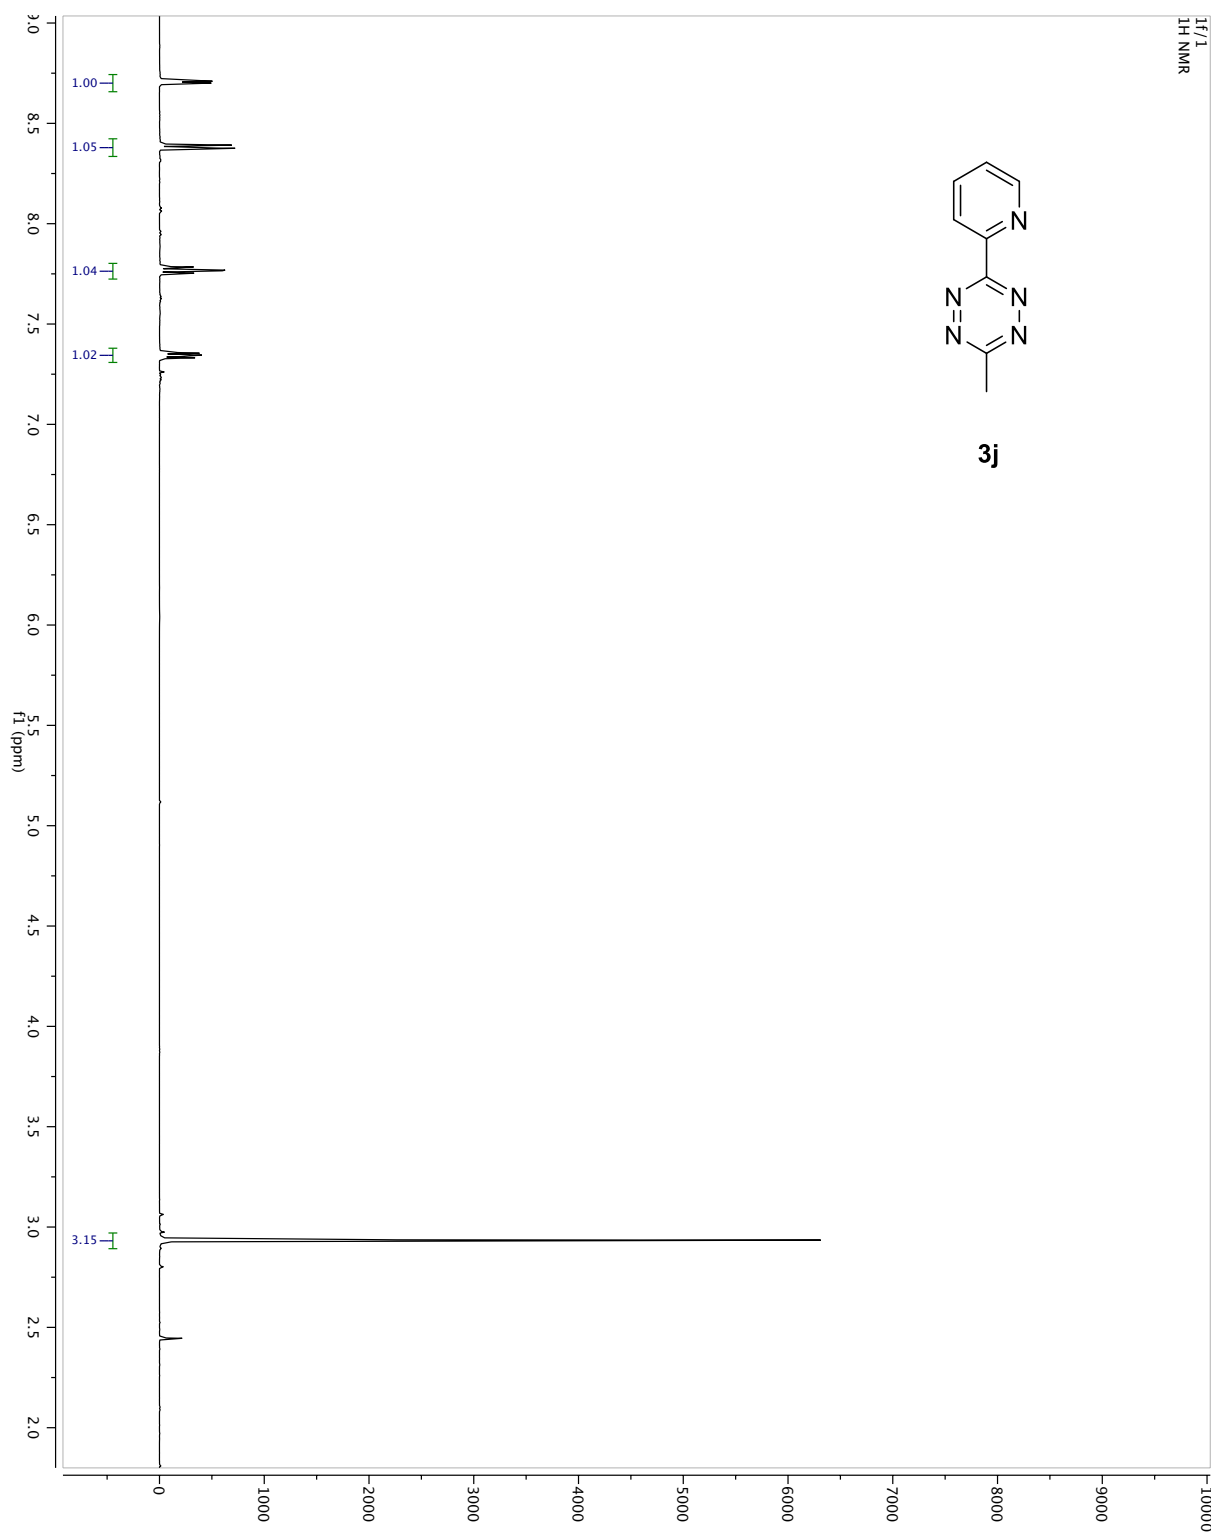

$^{13}\text{C}$  NMR spectrum of **3j** in  $\text{CDCl}_3$  (125 MHz).

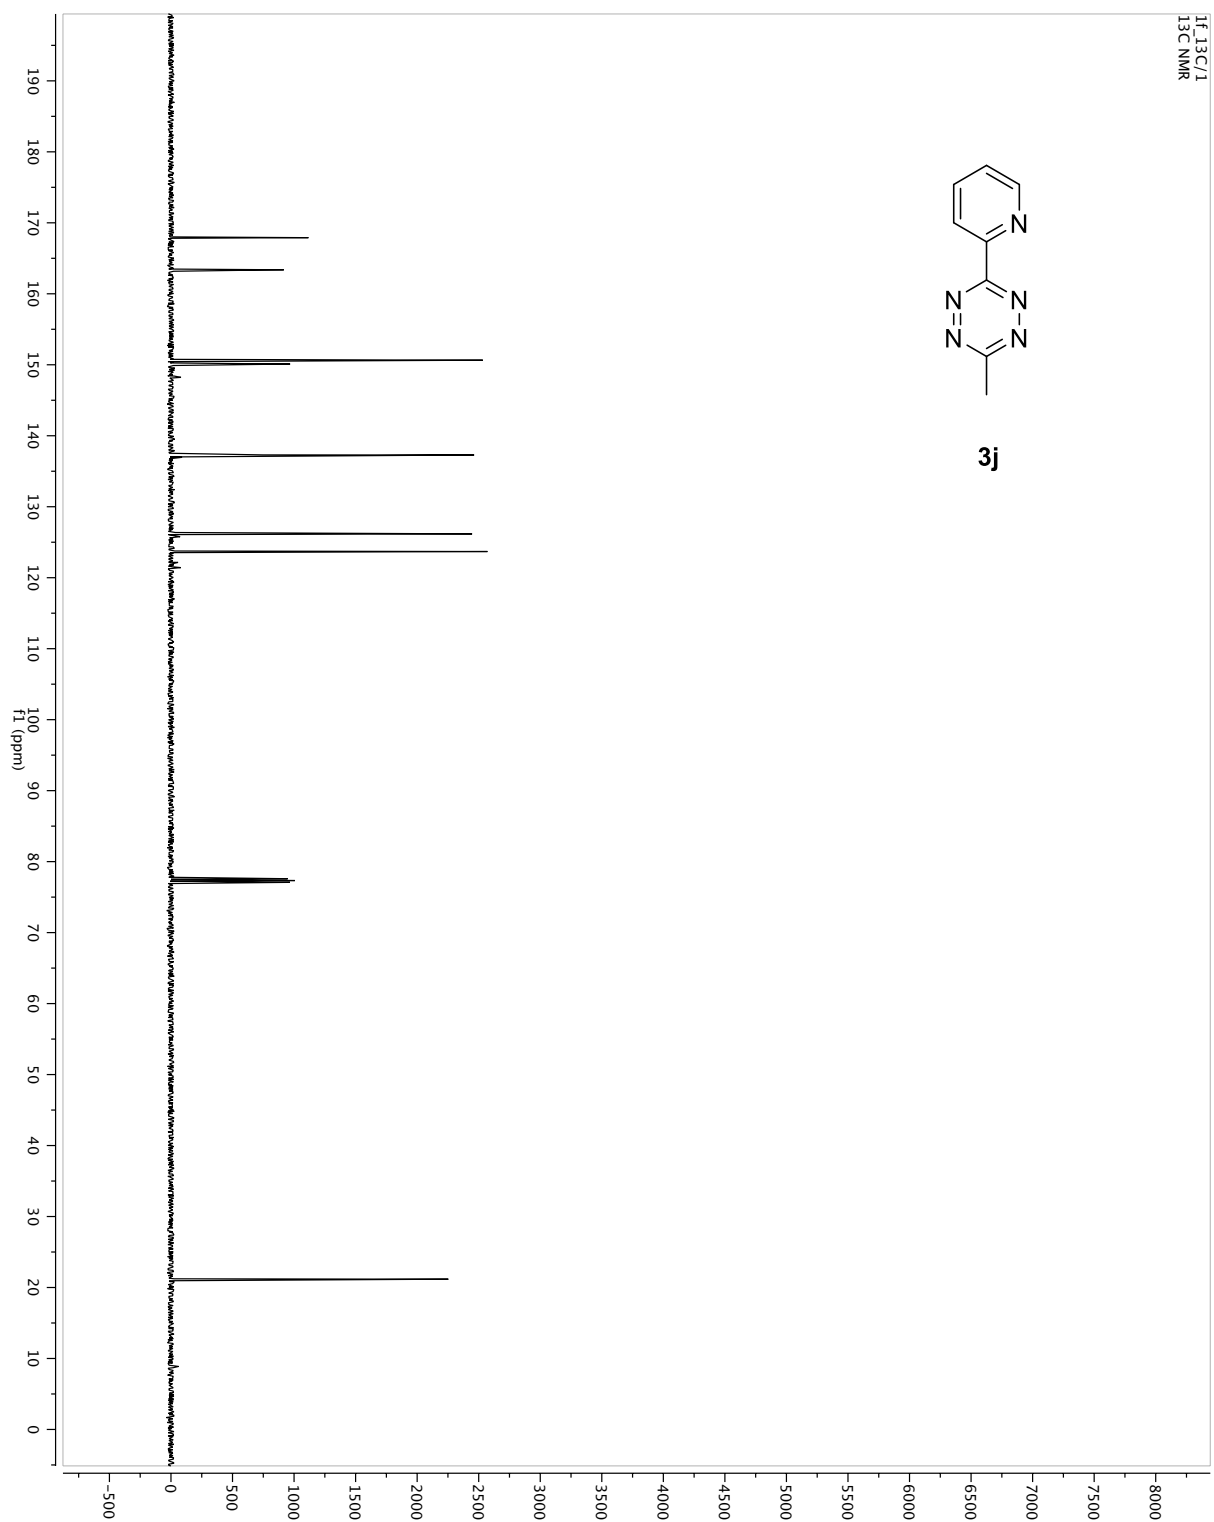

$^1\text{H}$  NMR spectrum of **3k** in  $\text{CDCl}_3$  (500 MHz).

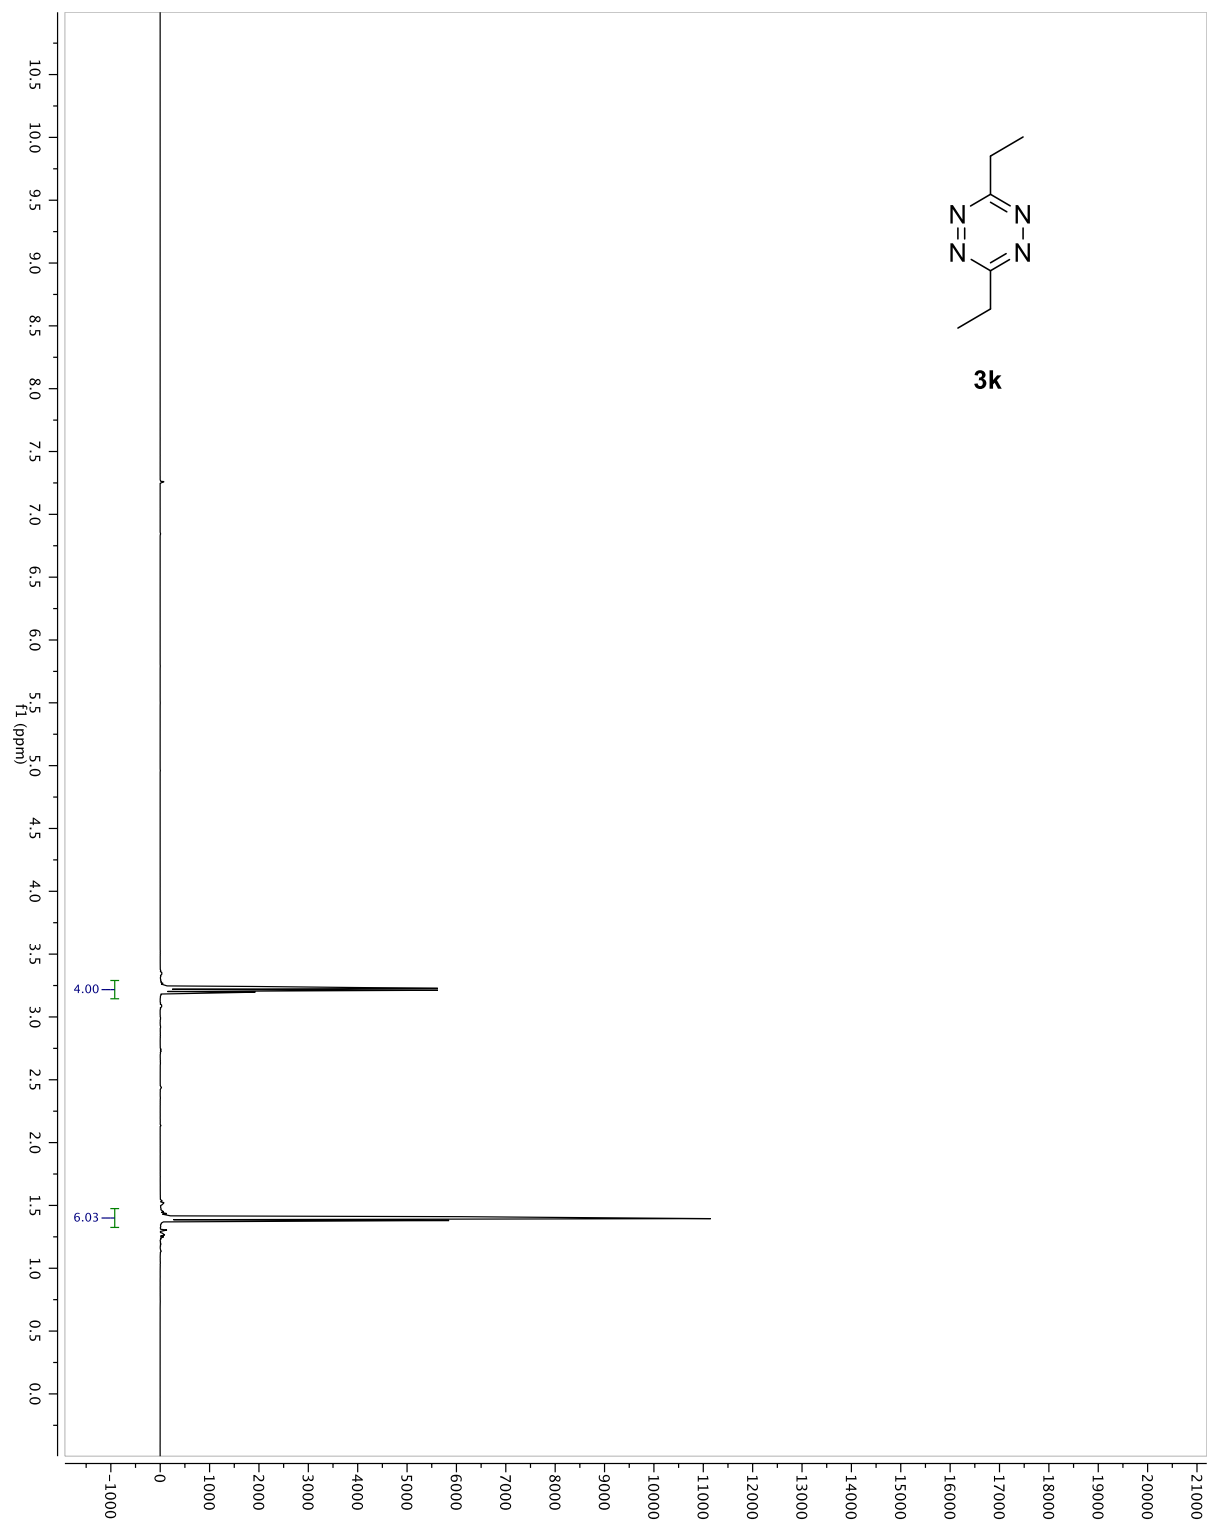



$^{13}\text{C}$  NMR spectrum of **3k** in  $\text{CDCl}_3$  (125 MHz).

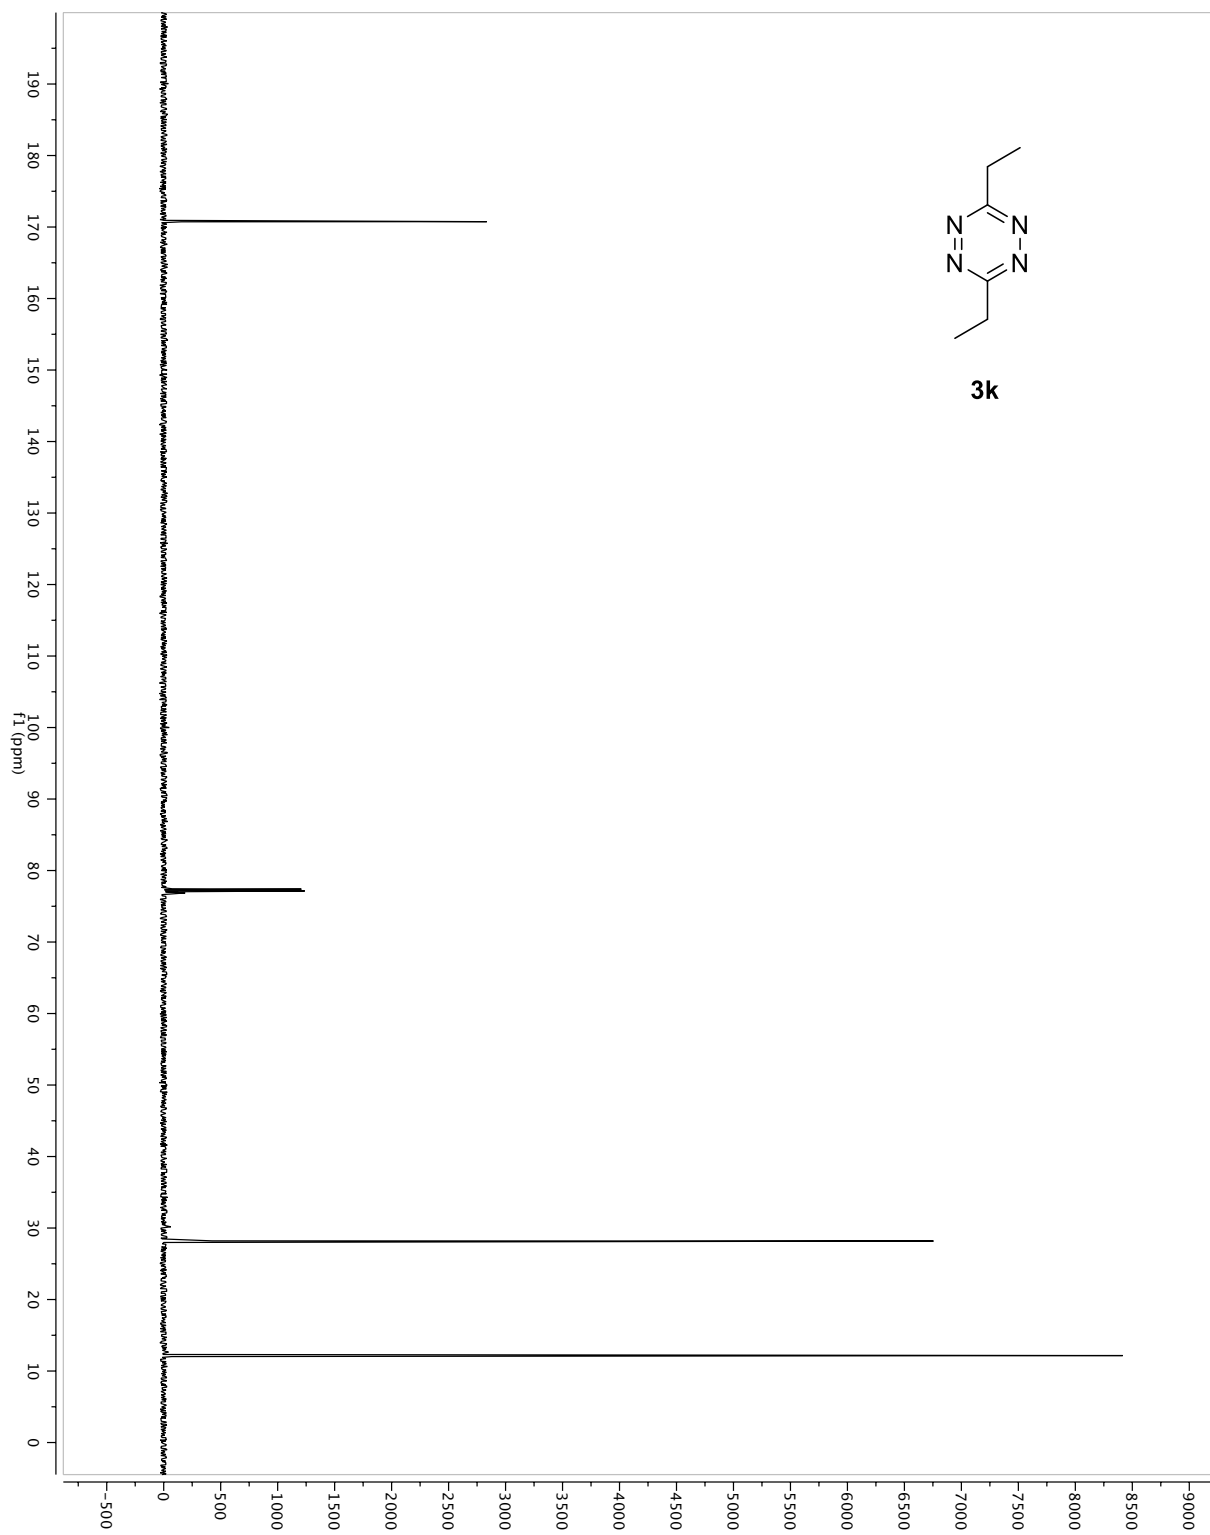

$^1\text{H}$  NMR spectrum of **3I** in  $\text{CDCl}_3$  (500 MHz).

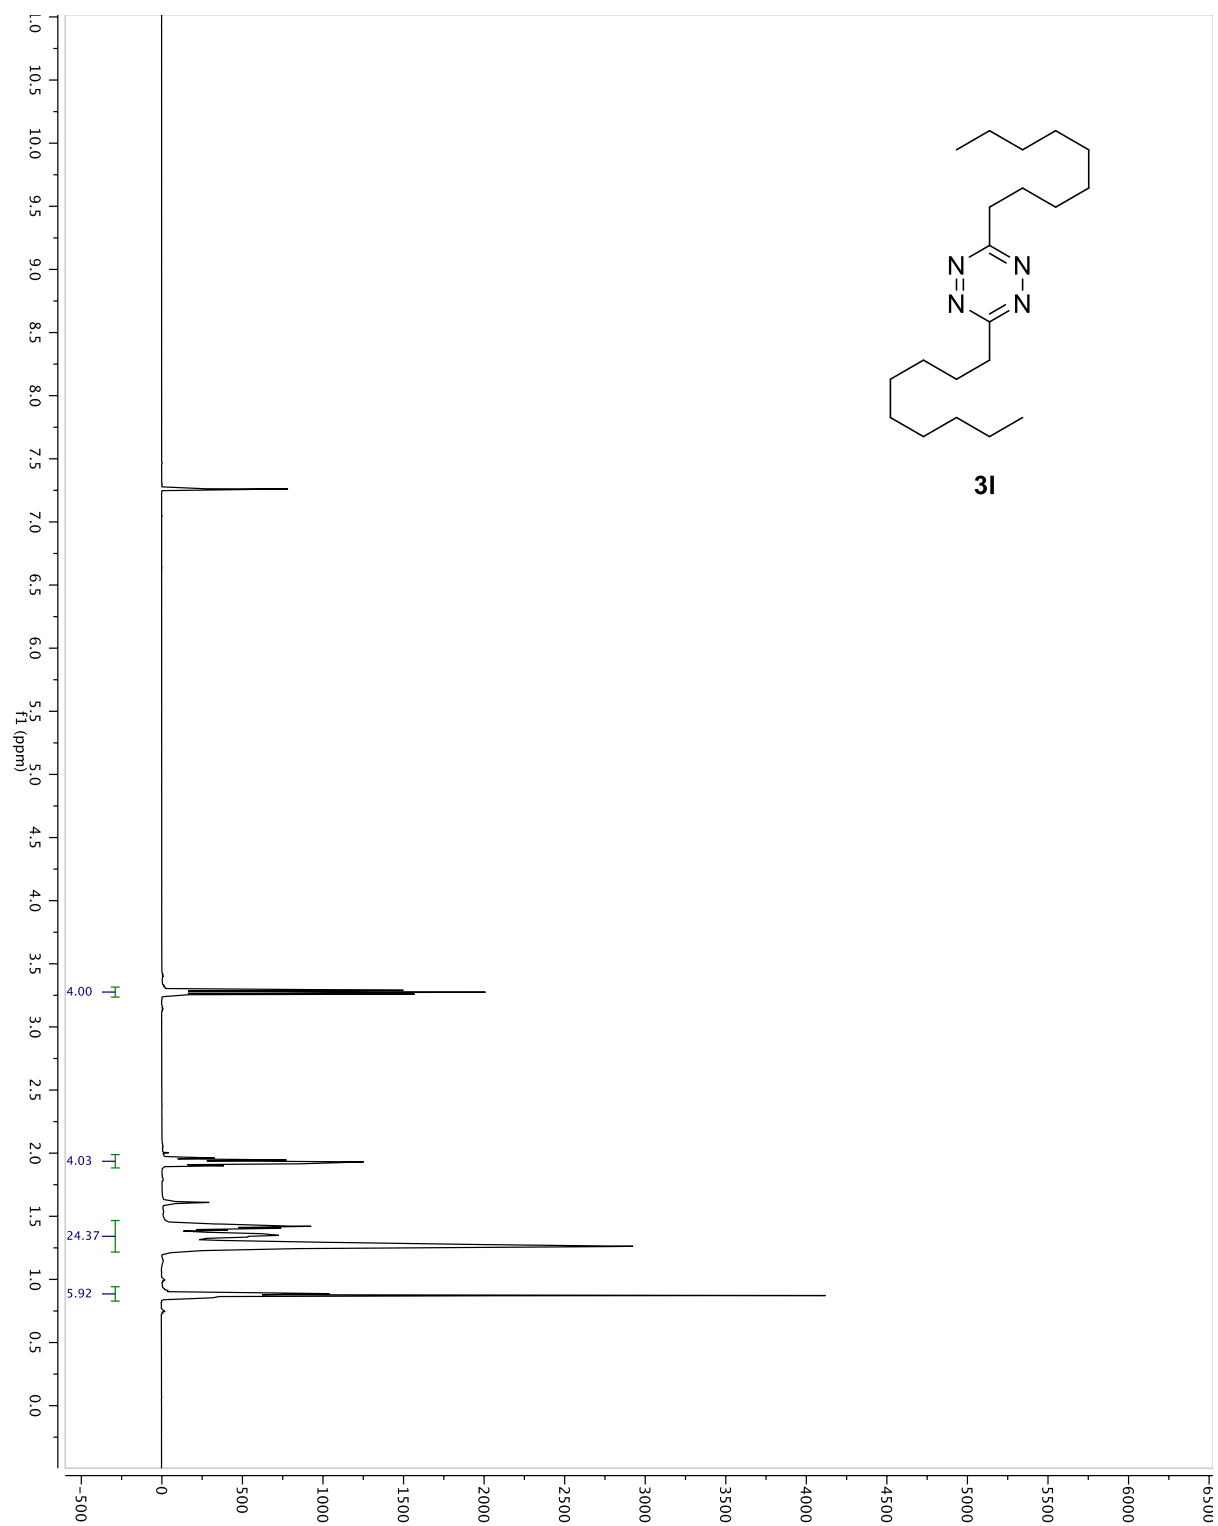

$^{13}\text{C}$  NMR spectrum of **3I** in  $\text{CDCl}_3$  (125 MHz).

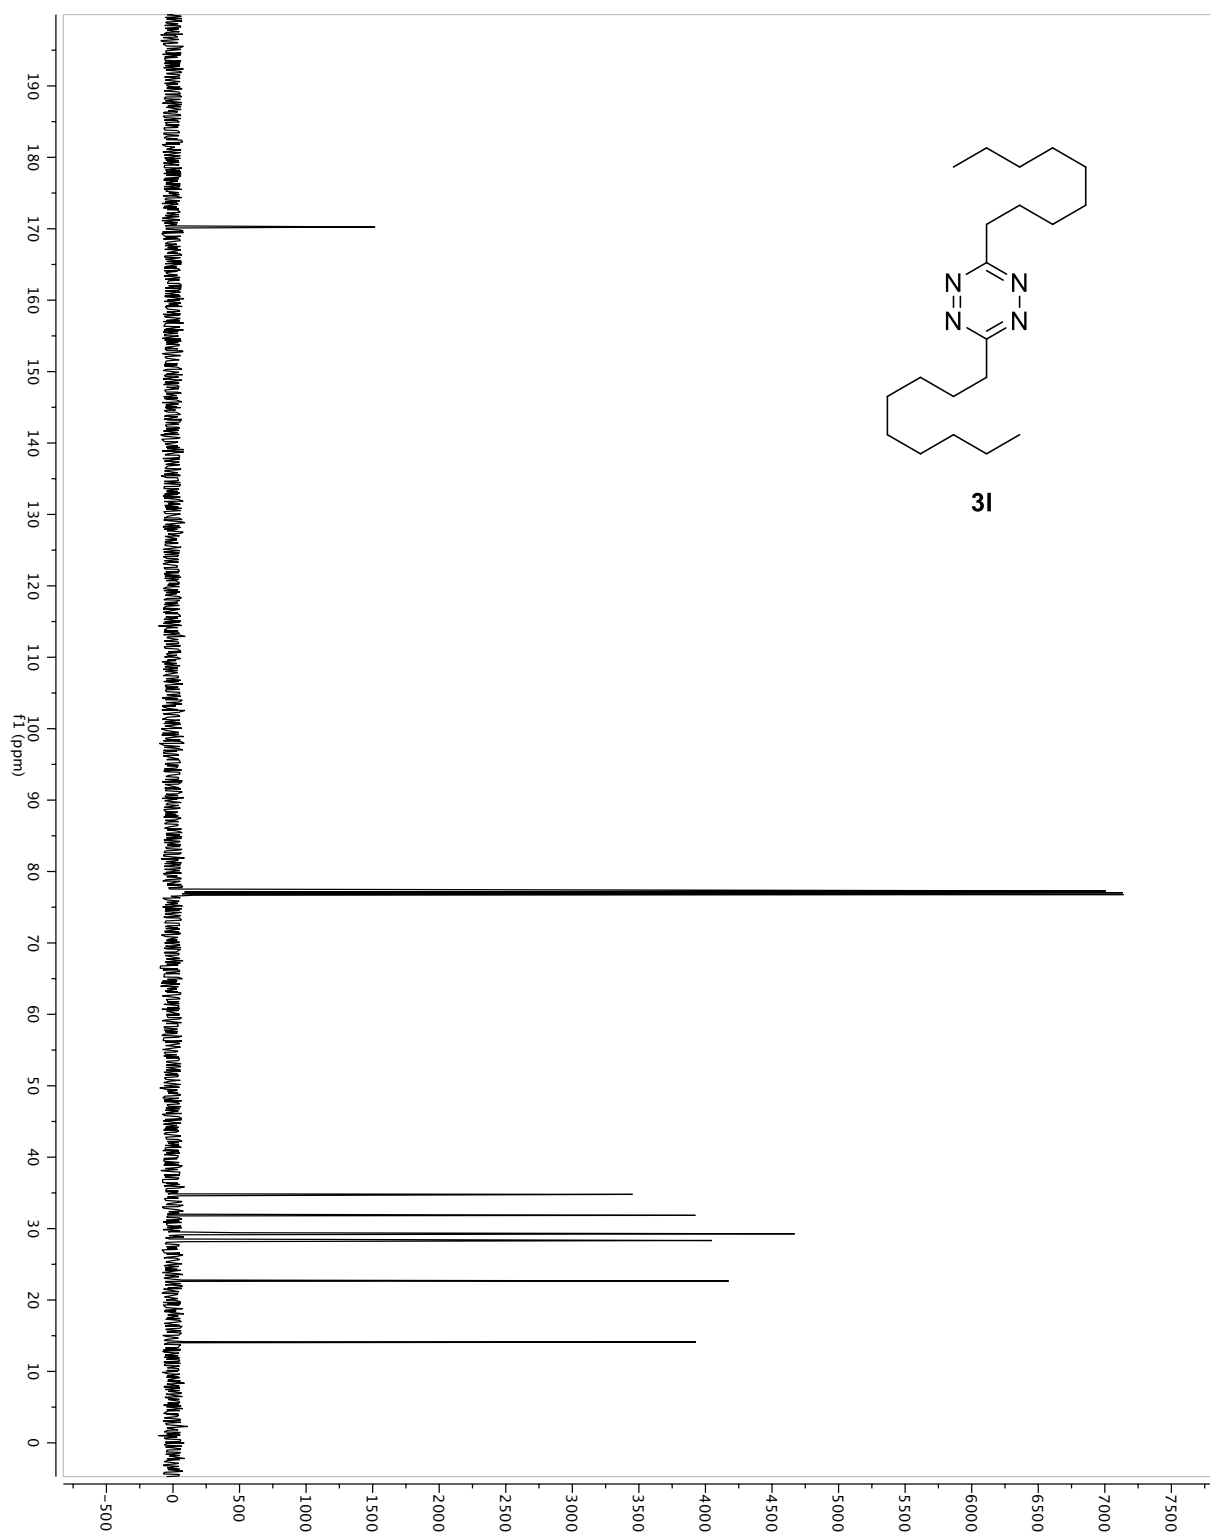

$^1\text{H}$  NMR spectrum of **3m** in  $\text{CDCl}_3$  (500 MHz).

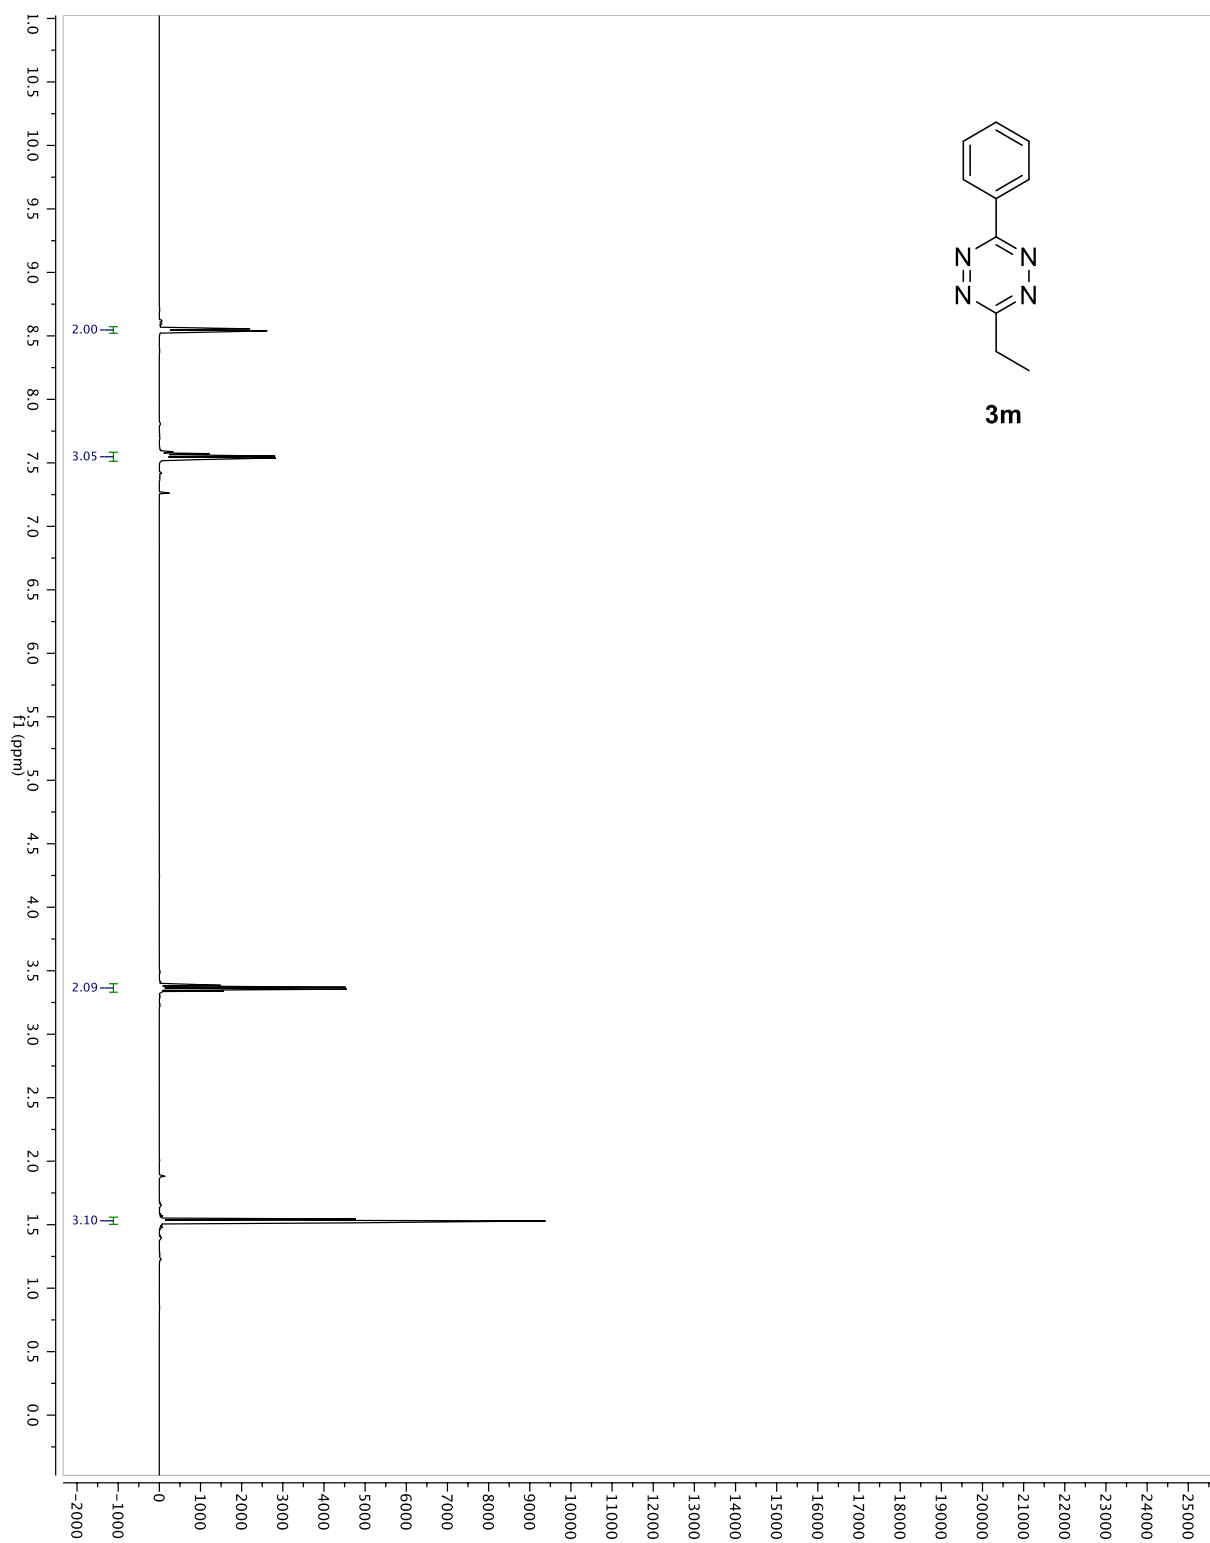

$^{13}\text{C}$  NMR spectrum of **3m** in  $\text{CDCl}_3$  (125 MHz).

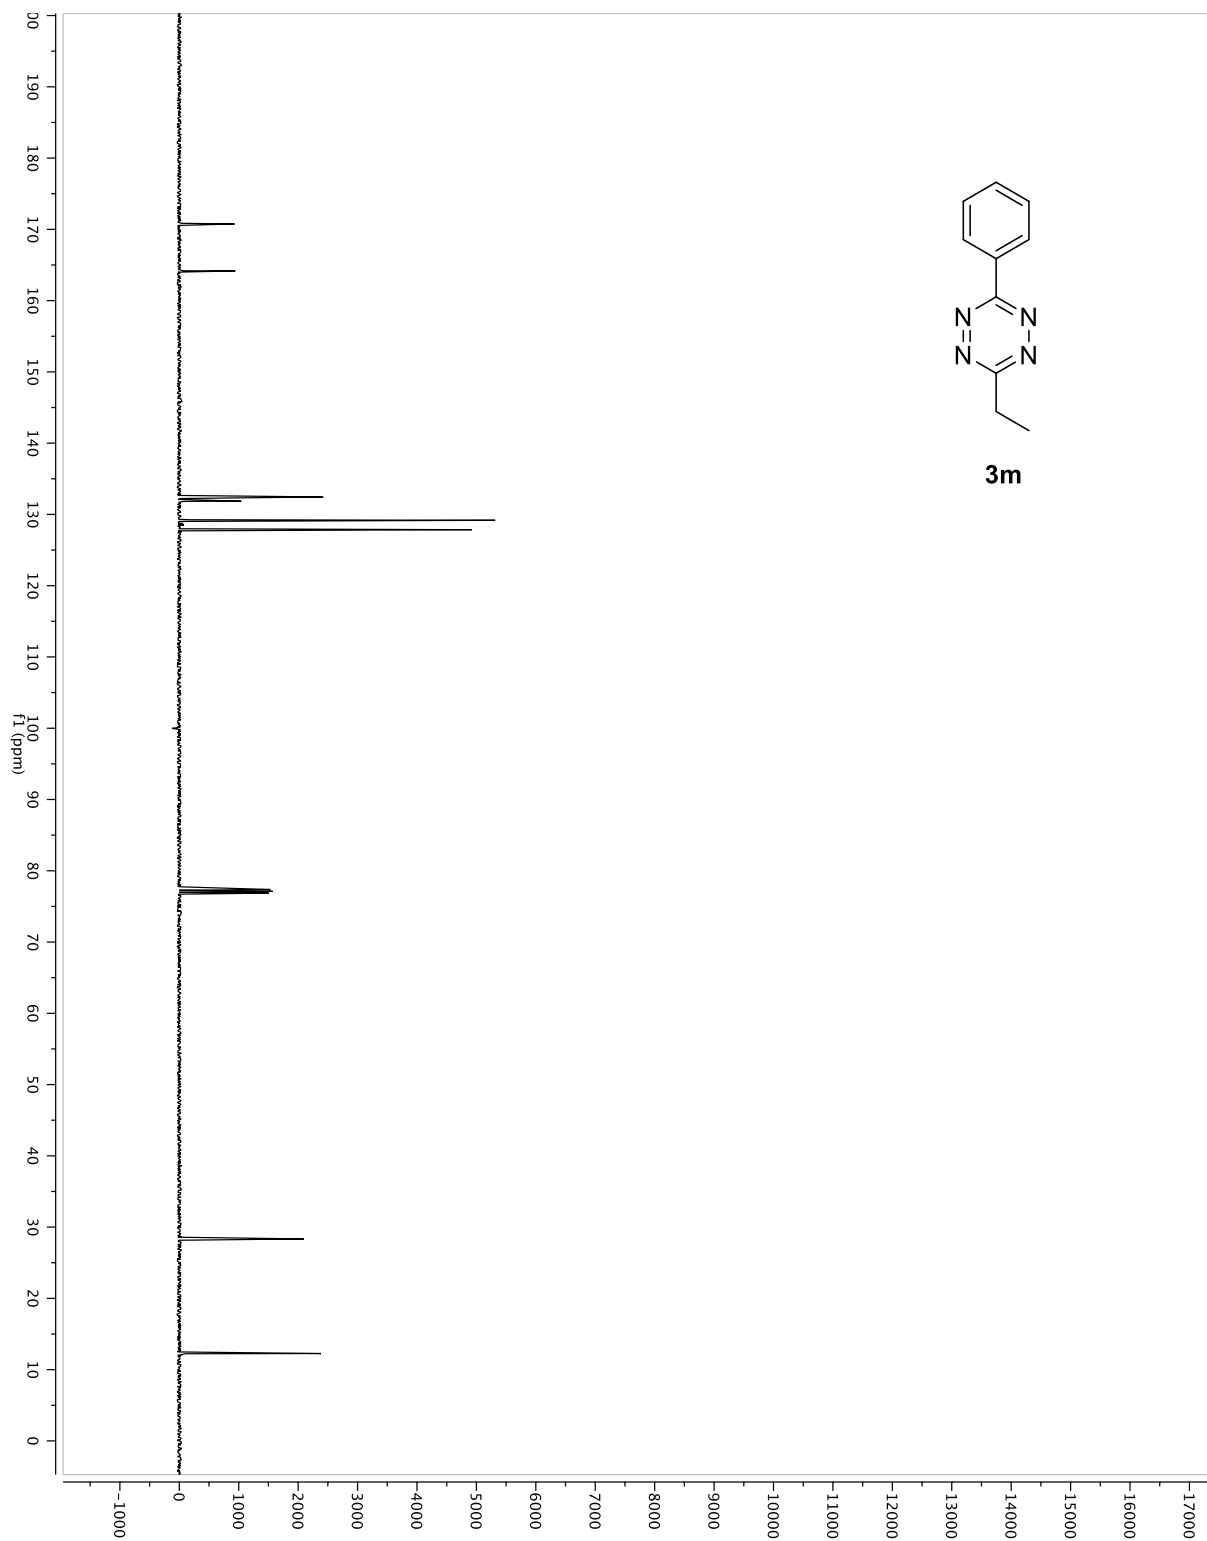

$^1\text{H}$  NMR spectrum of **3n** in  $\text{CDCl}_3$  (500 MHz).

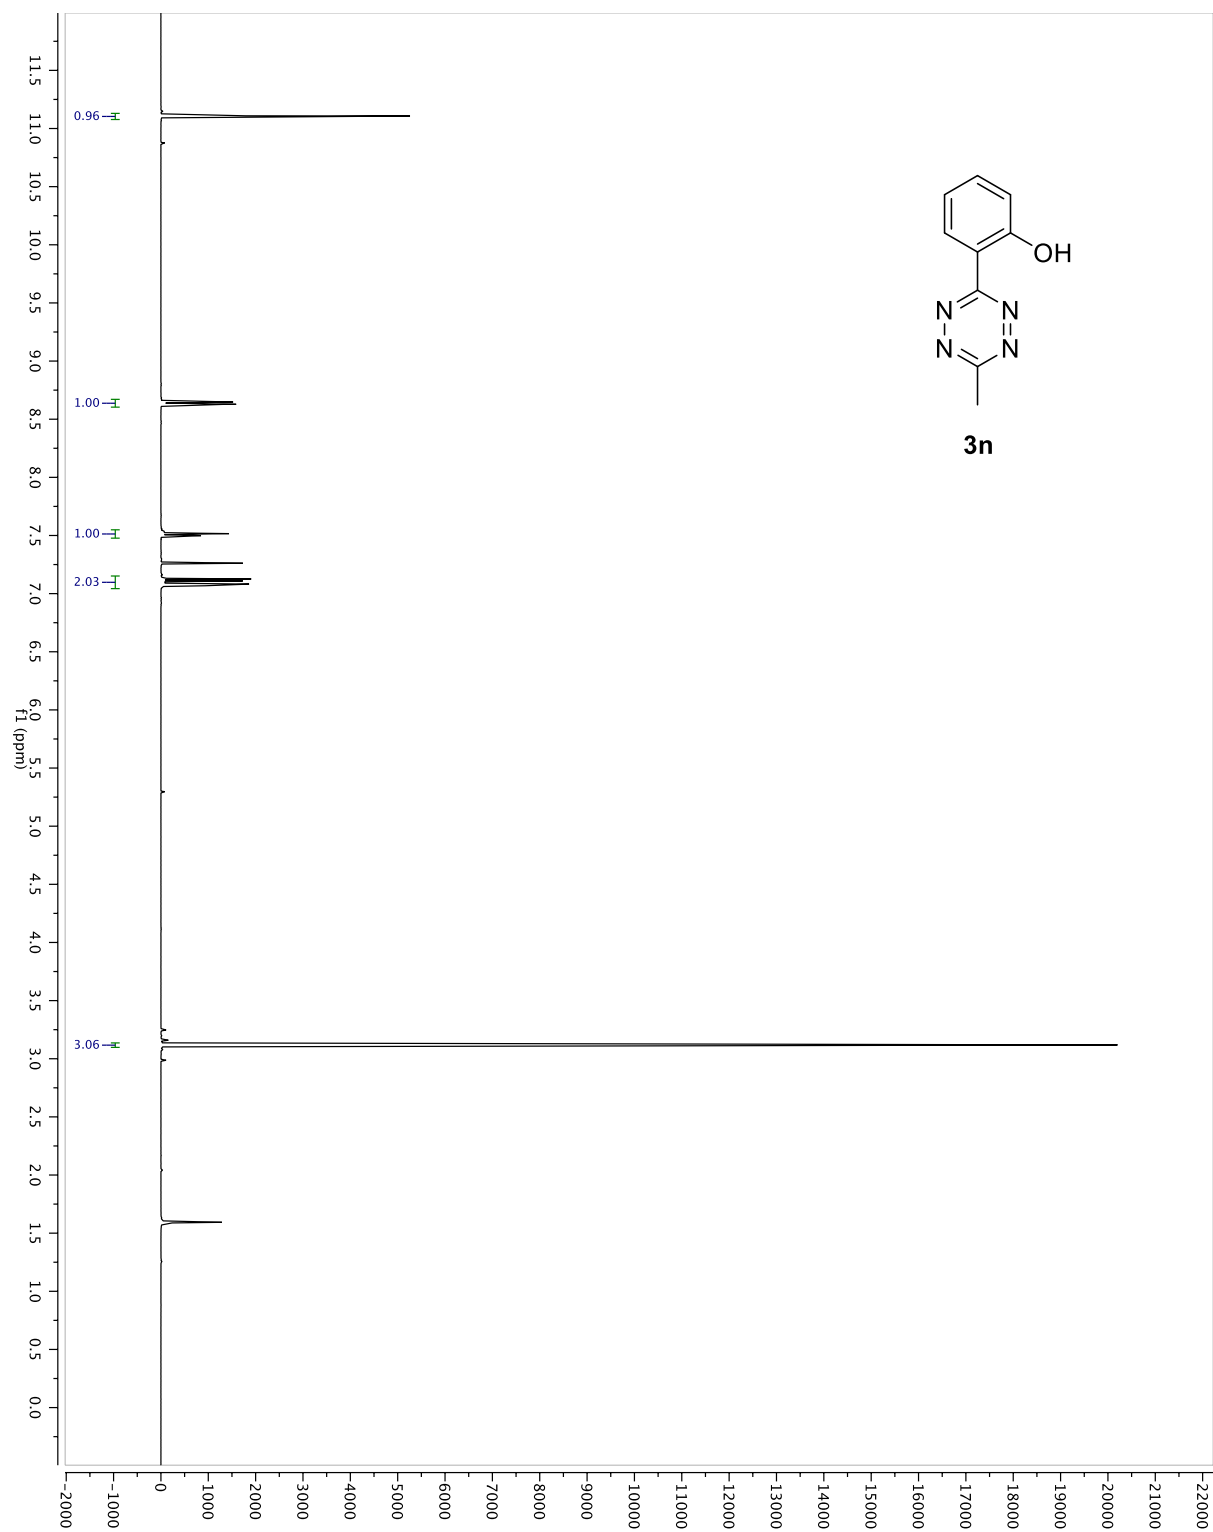

$^{13}\text{C}$  NMR spectrum of **3n** in  $\text{CDCl}_3$  (125 MHz).

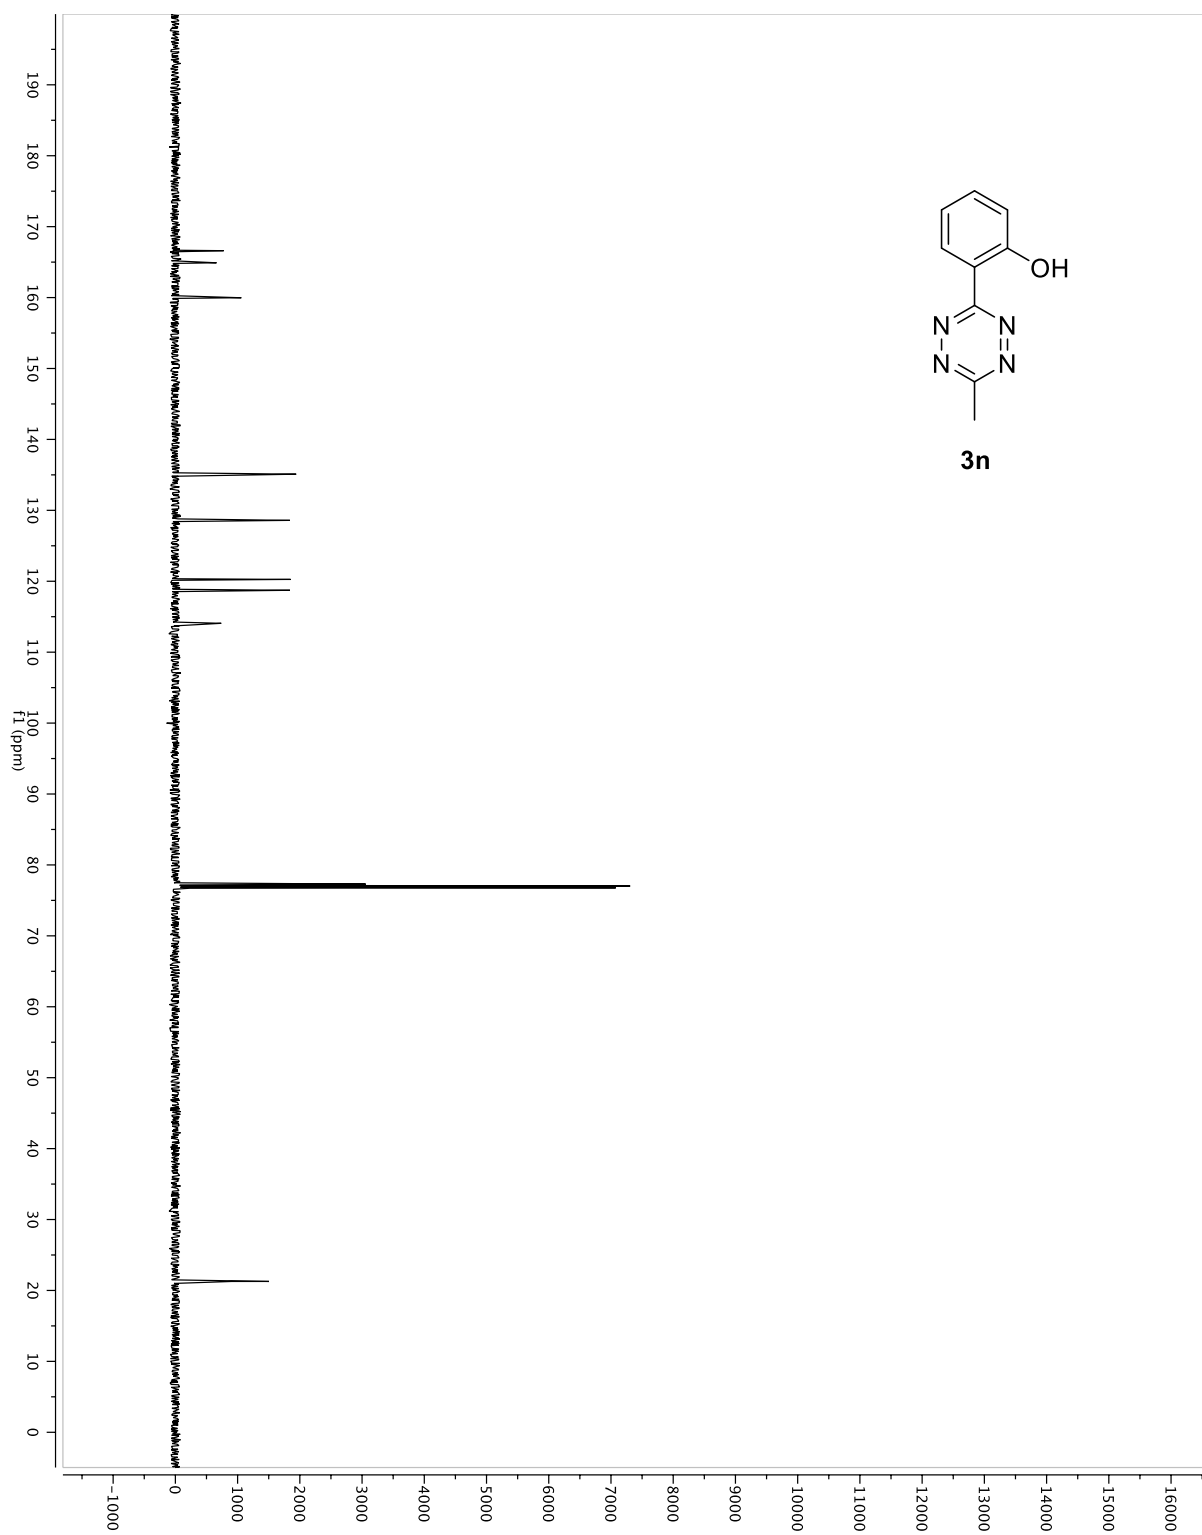

$^1\text{H}$  NMR spectrum of **4b** in  $\text{CDCl}_3$  (500 MHz).

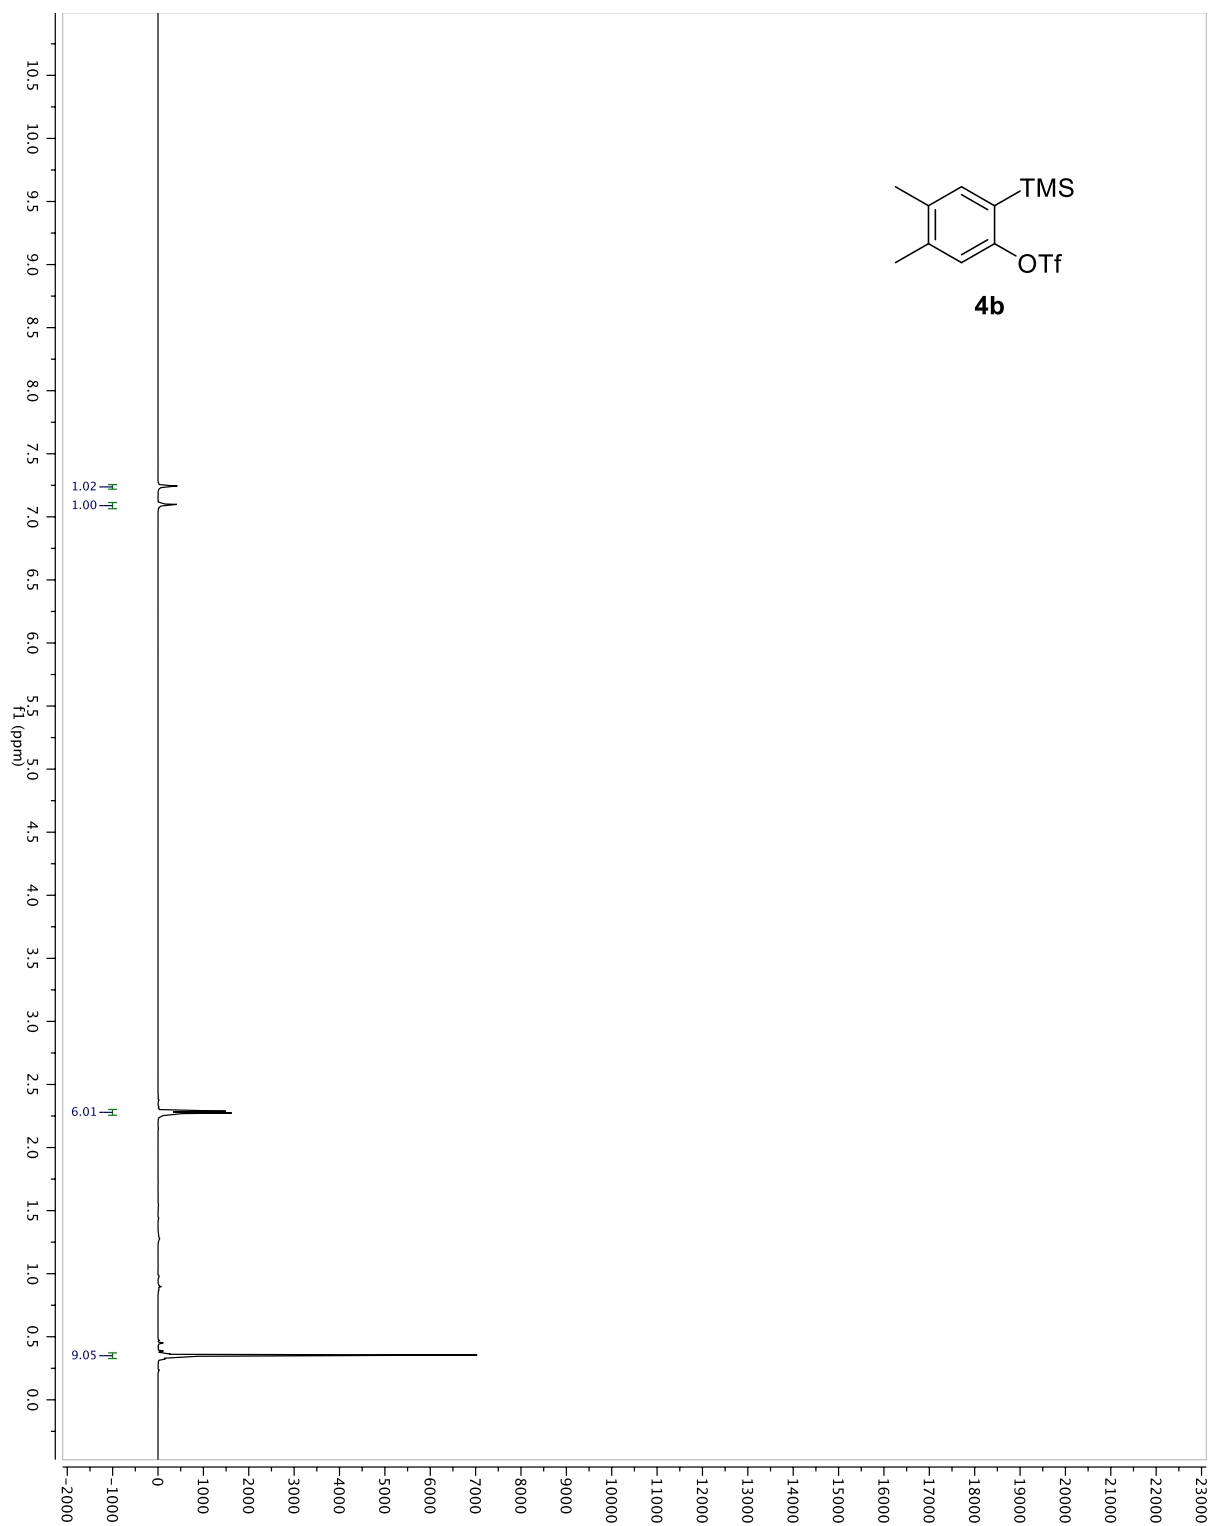



$^1\text{H}$  NMR spectrum of **5a** in  $\text{CD}_2\text{Cl}_2$  (500 MHz).

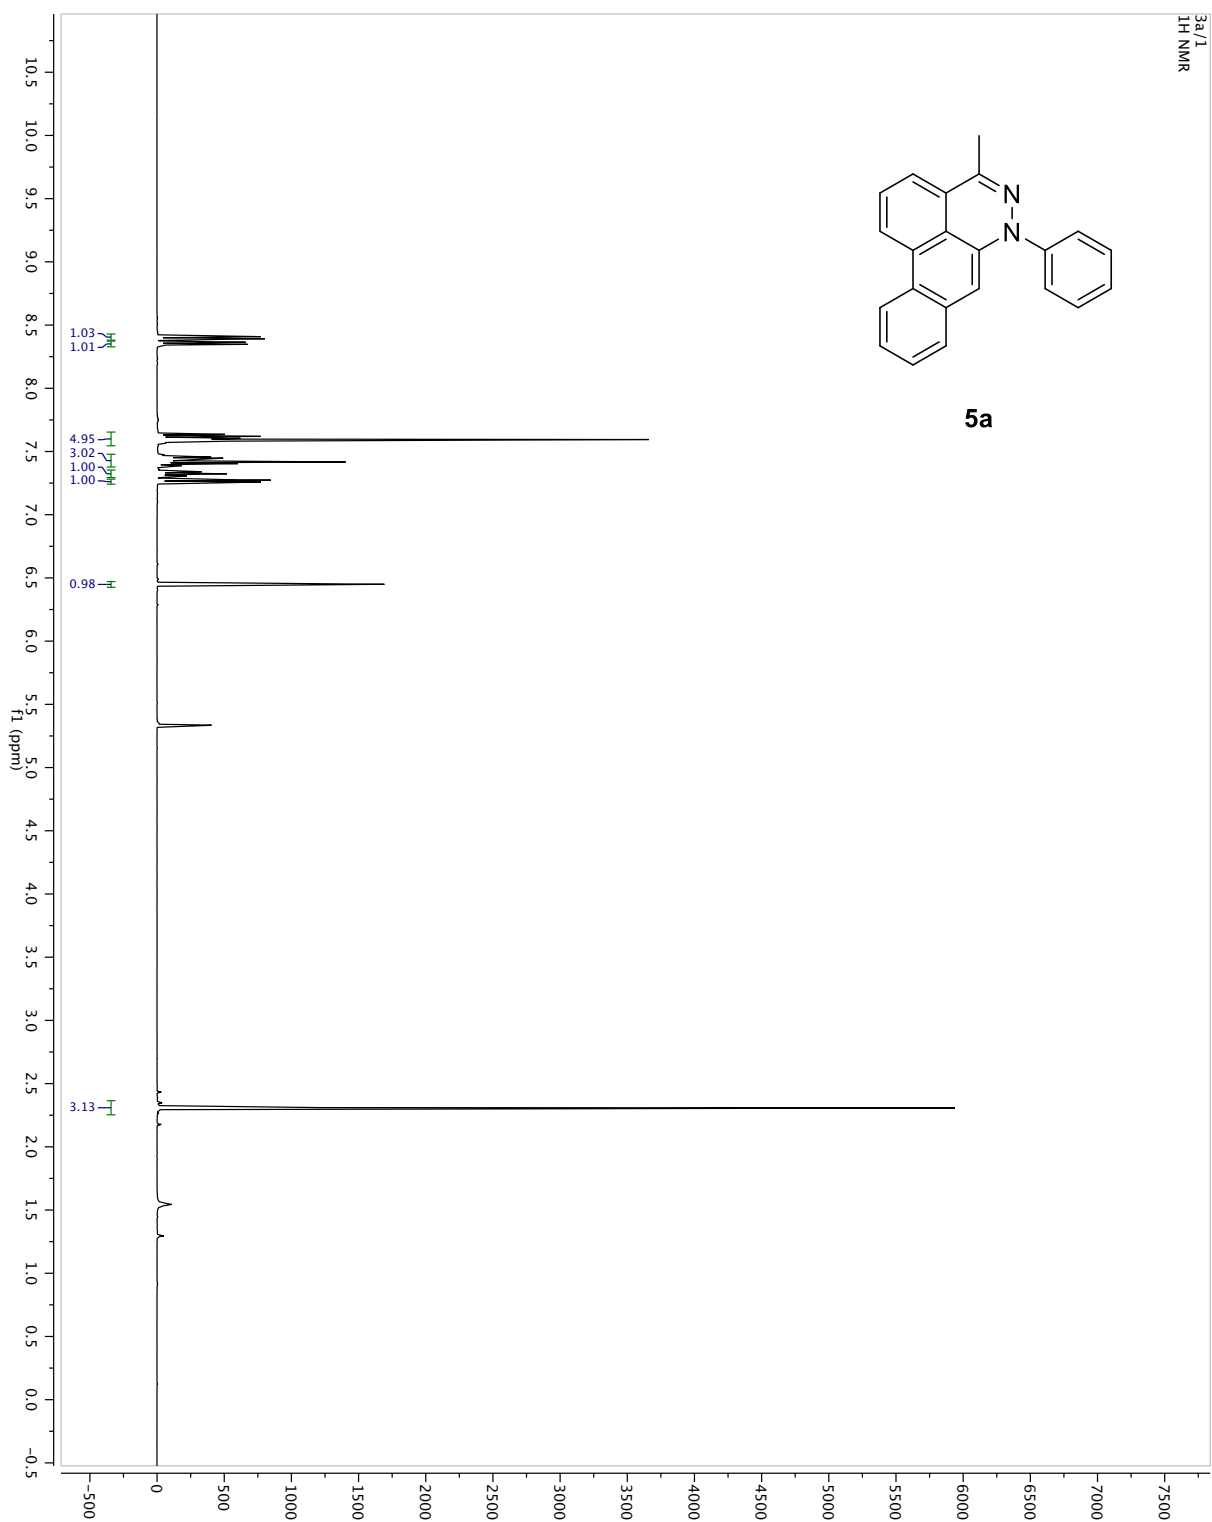

$^{13}\text{C}$  NMR spectrum of **5a** in  $\text{CD}_2\text{Cl}_2$  (125 MHz).

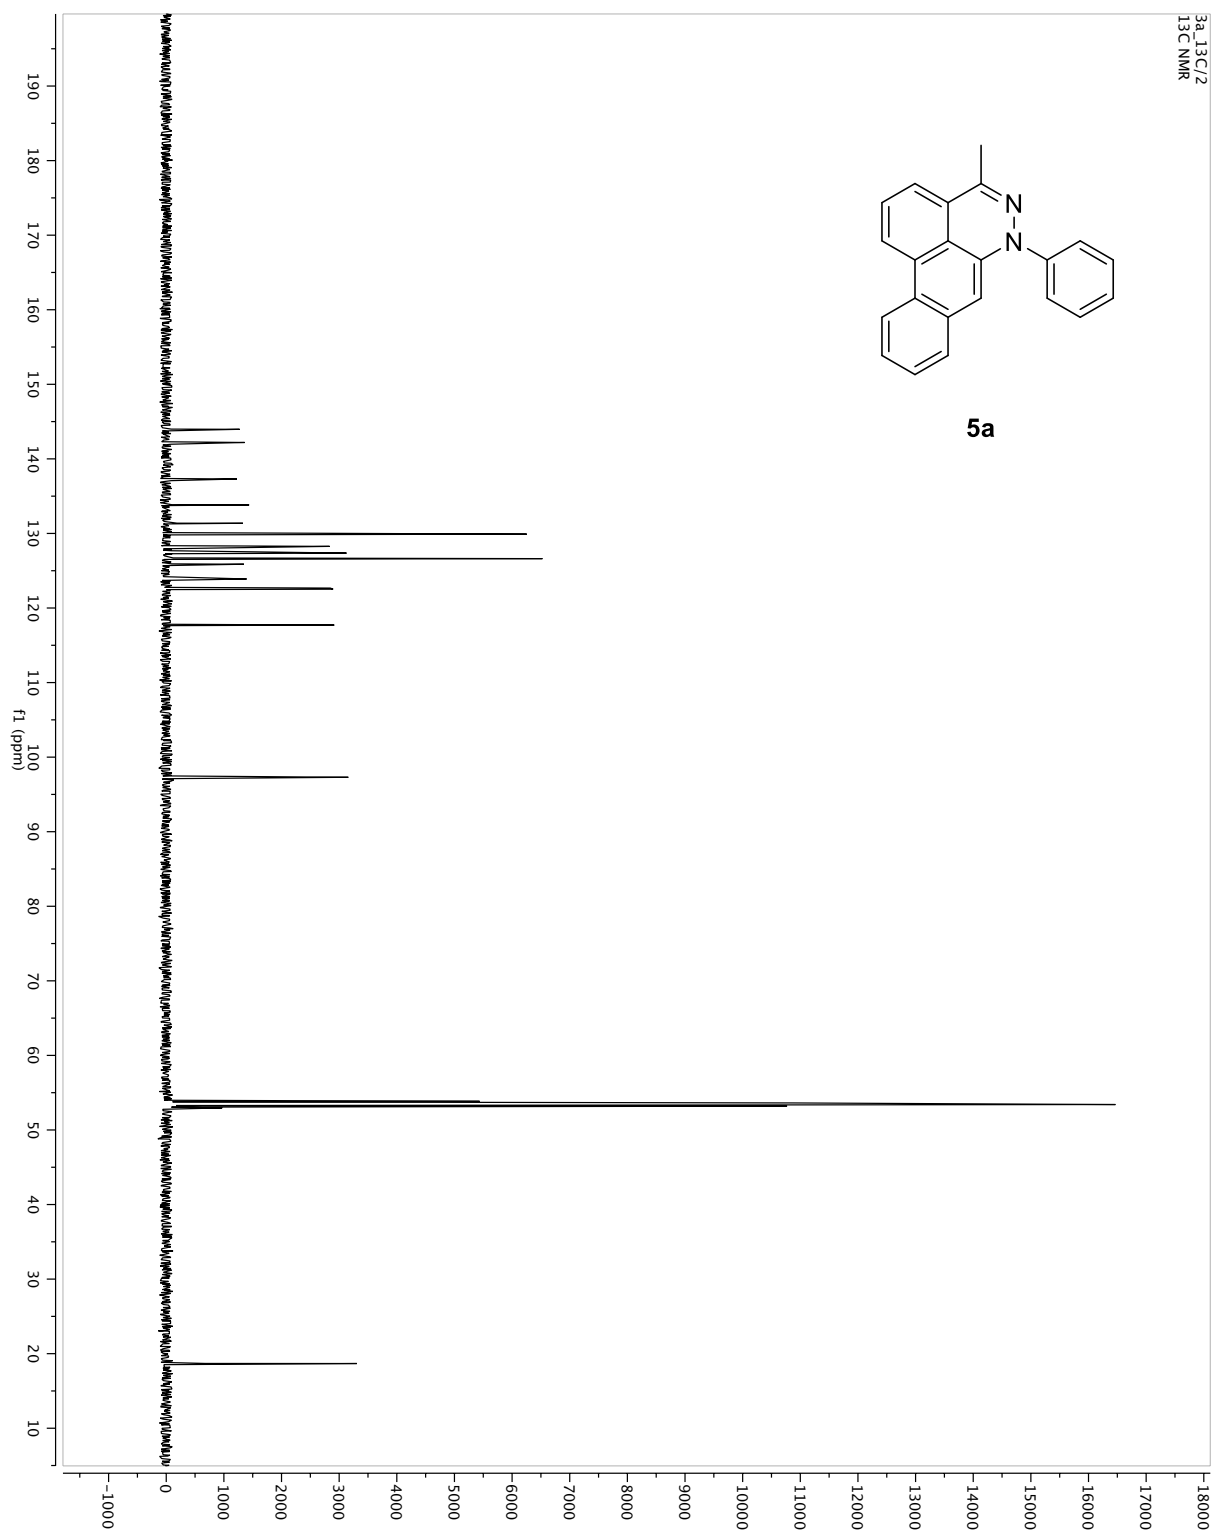

$^1\text{H}$  NMR spectrum of **5b** in  $\text{CD}_2\text{Cl}_2$  (500 MHz).

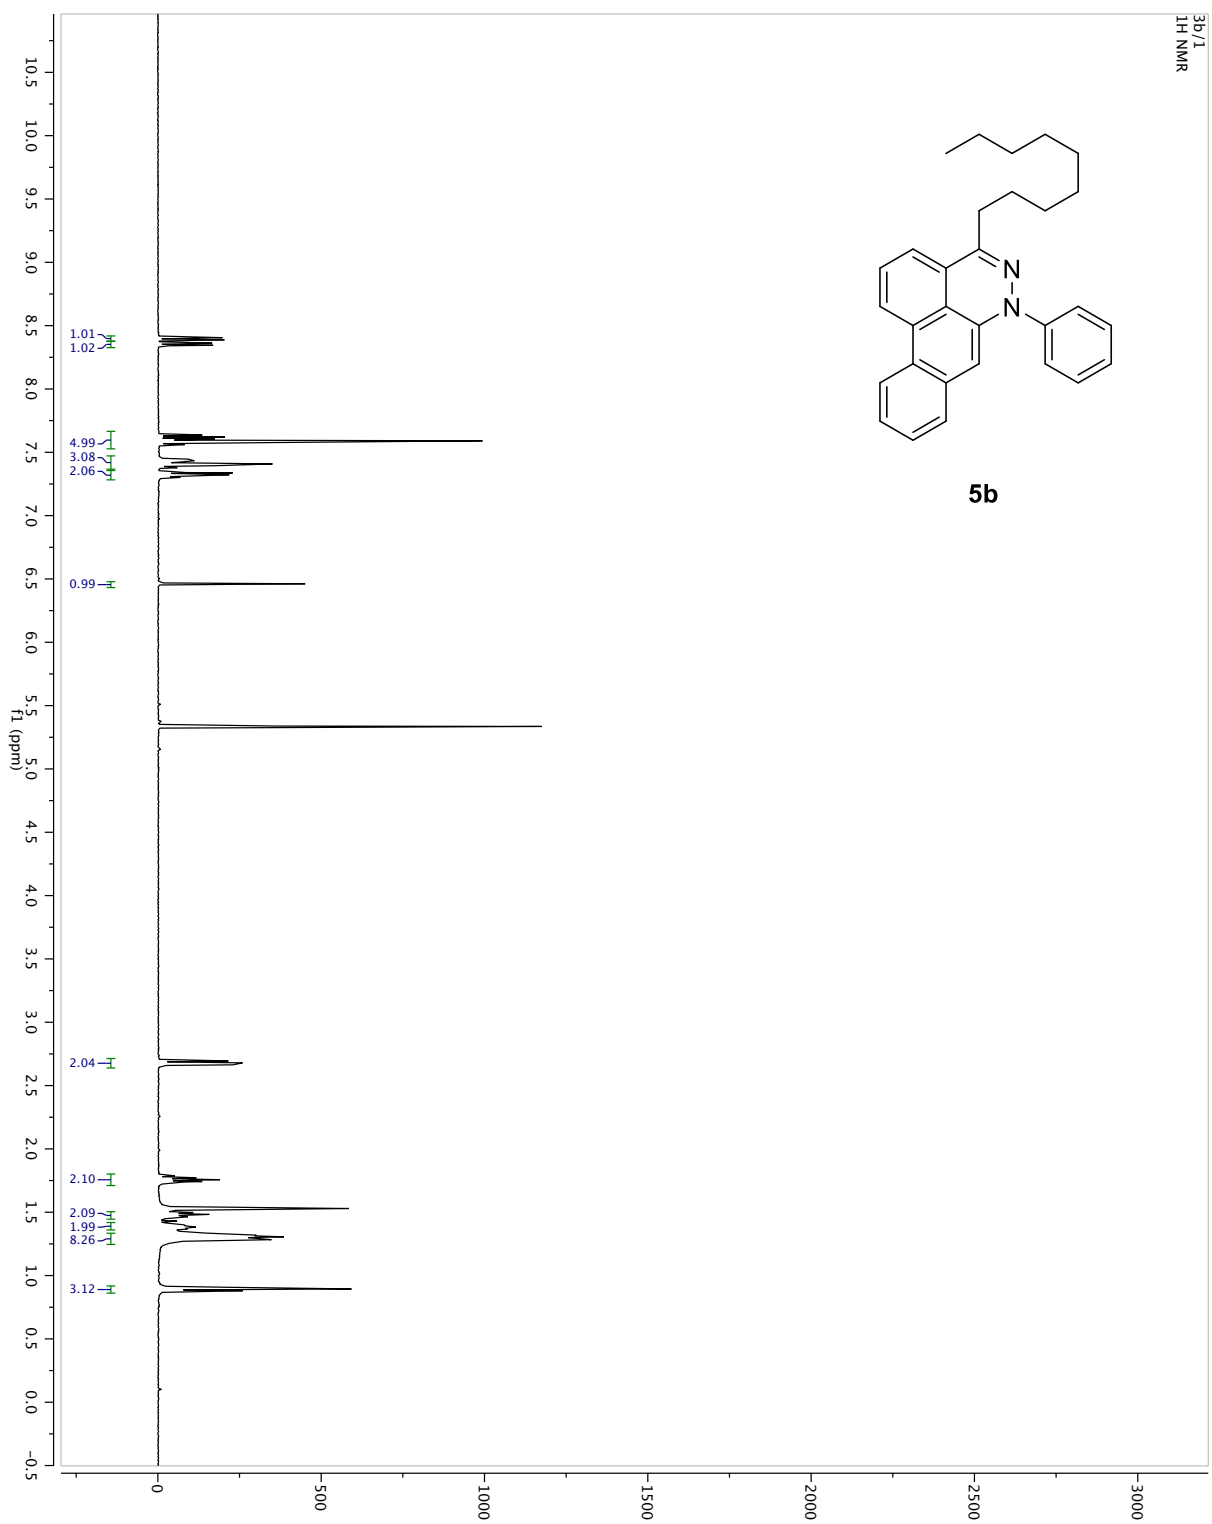

$^{13}\text{C}$  NMR spectrum of **5b** in  $\text{CD}_2\text{Cl}_2$  (125 MHz).

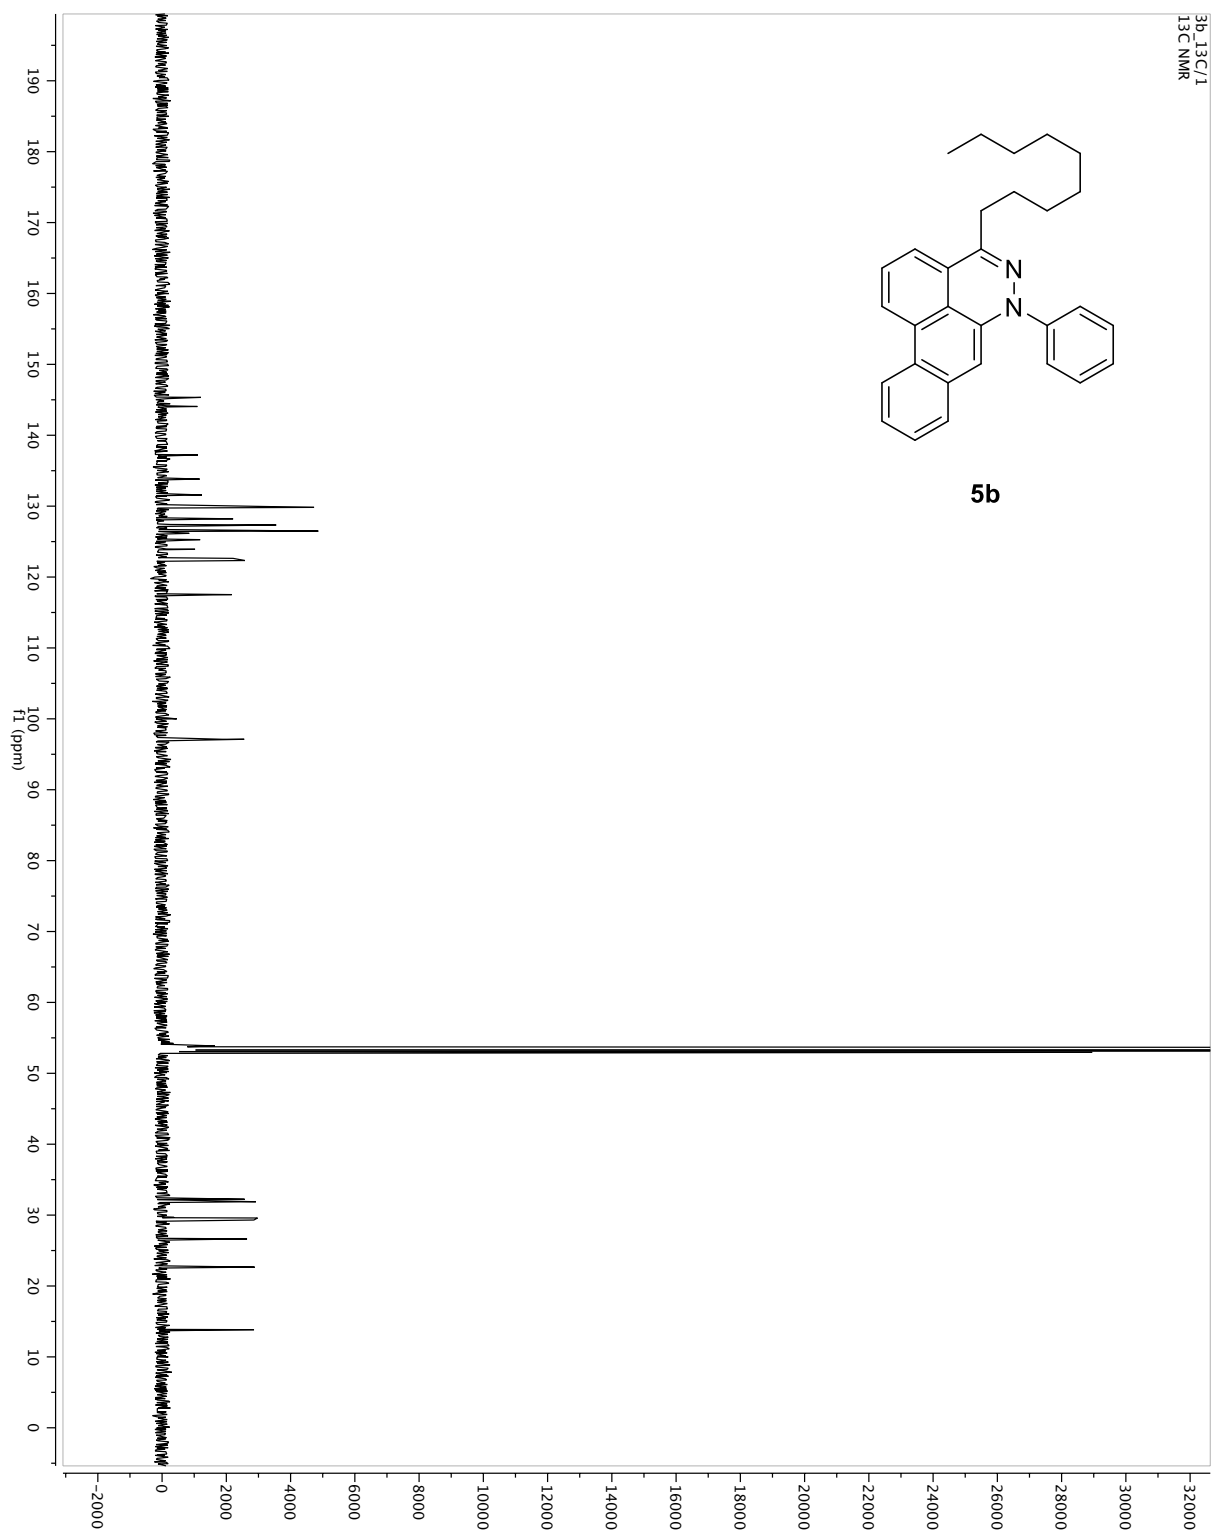

$^1\text{H}$  NMR spectrum of **5c** in  $\text{CD}_2\text{Cl}_2$  (500 MHz).

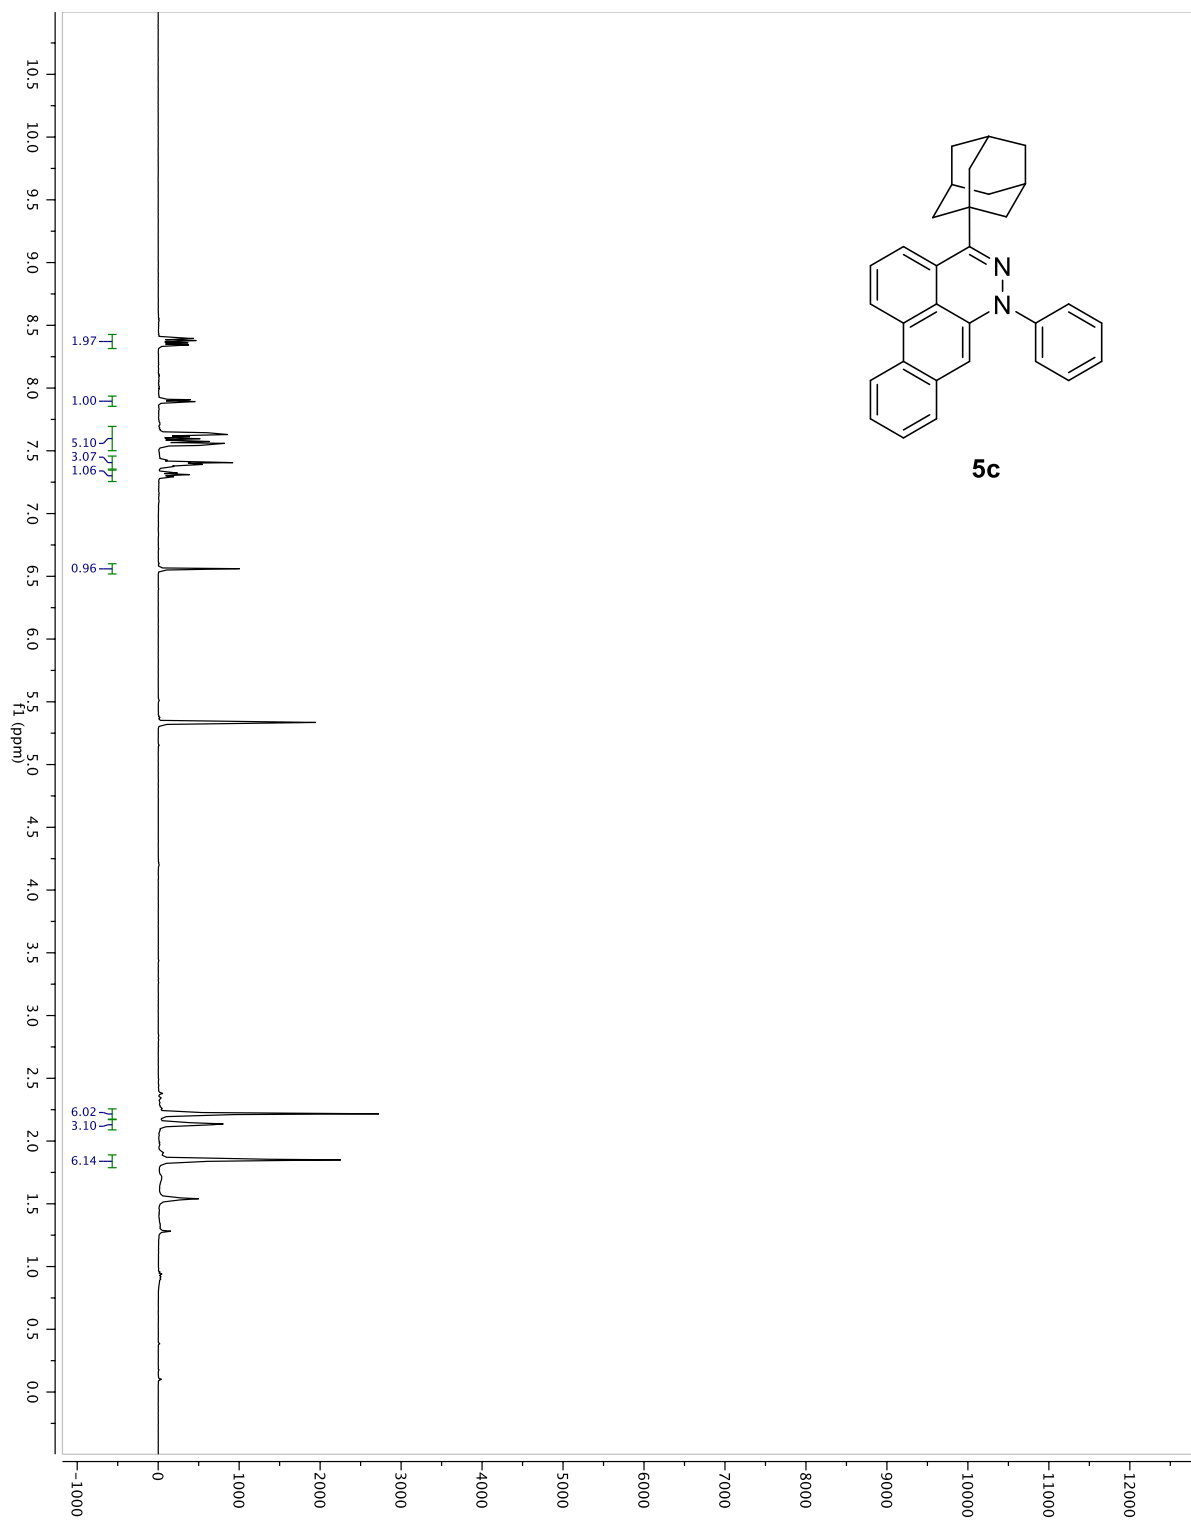

<sup>13</sup>C NMR spectrum of **5c** in CD<sub>2</sub>Cl<sub>2</sub> (125 MHz).

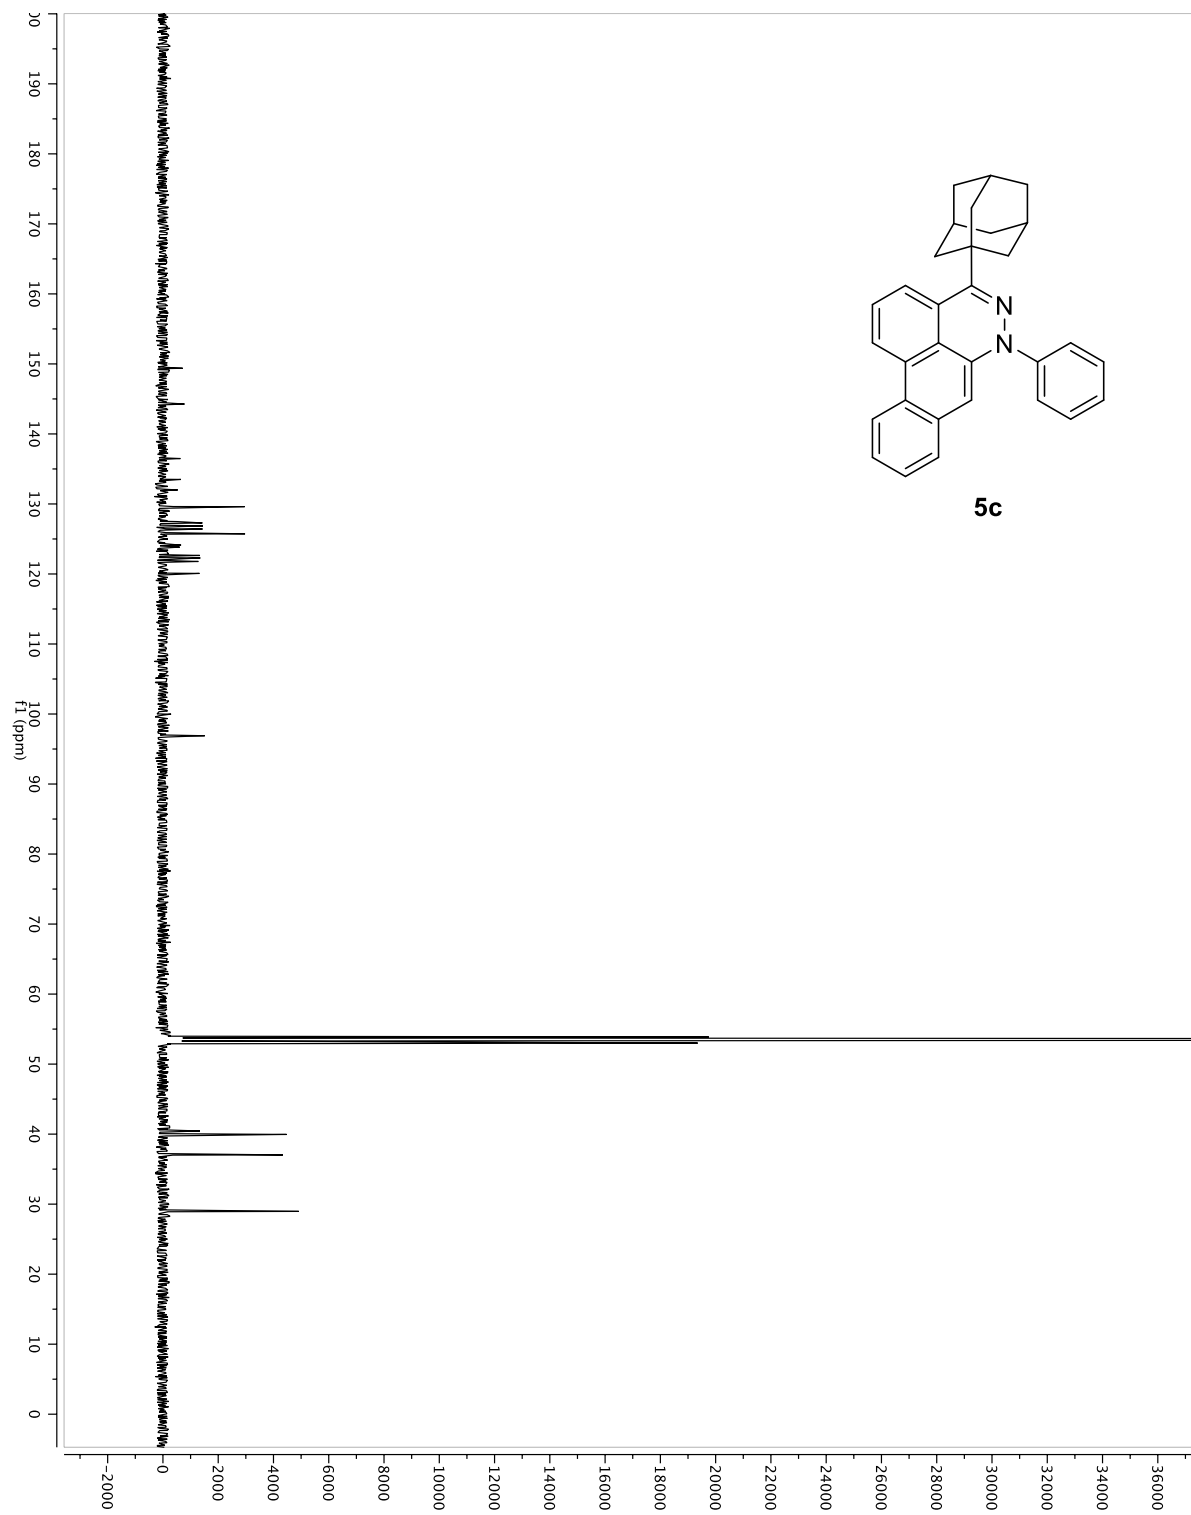

$^1\text{H}$  NMR spectrum of **5d** in  $\text{CD}_2\text{Cl}_2$  (500 MHz).

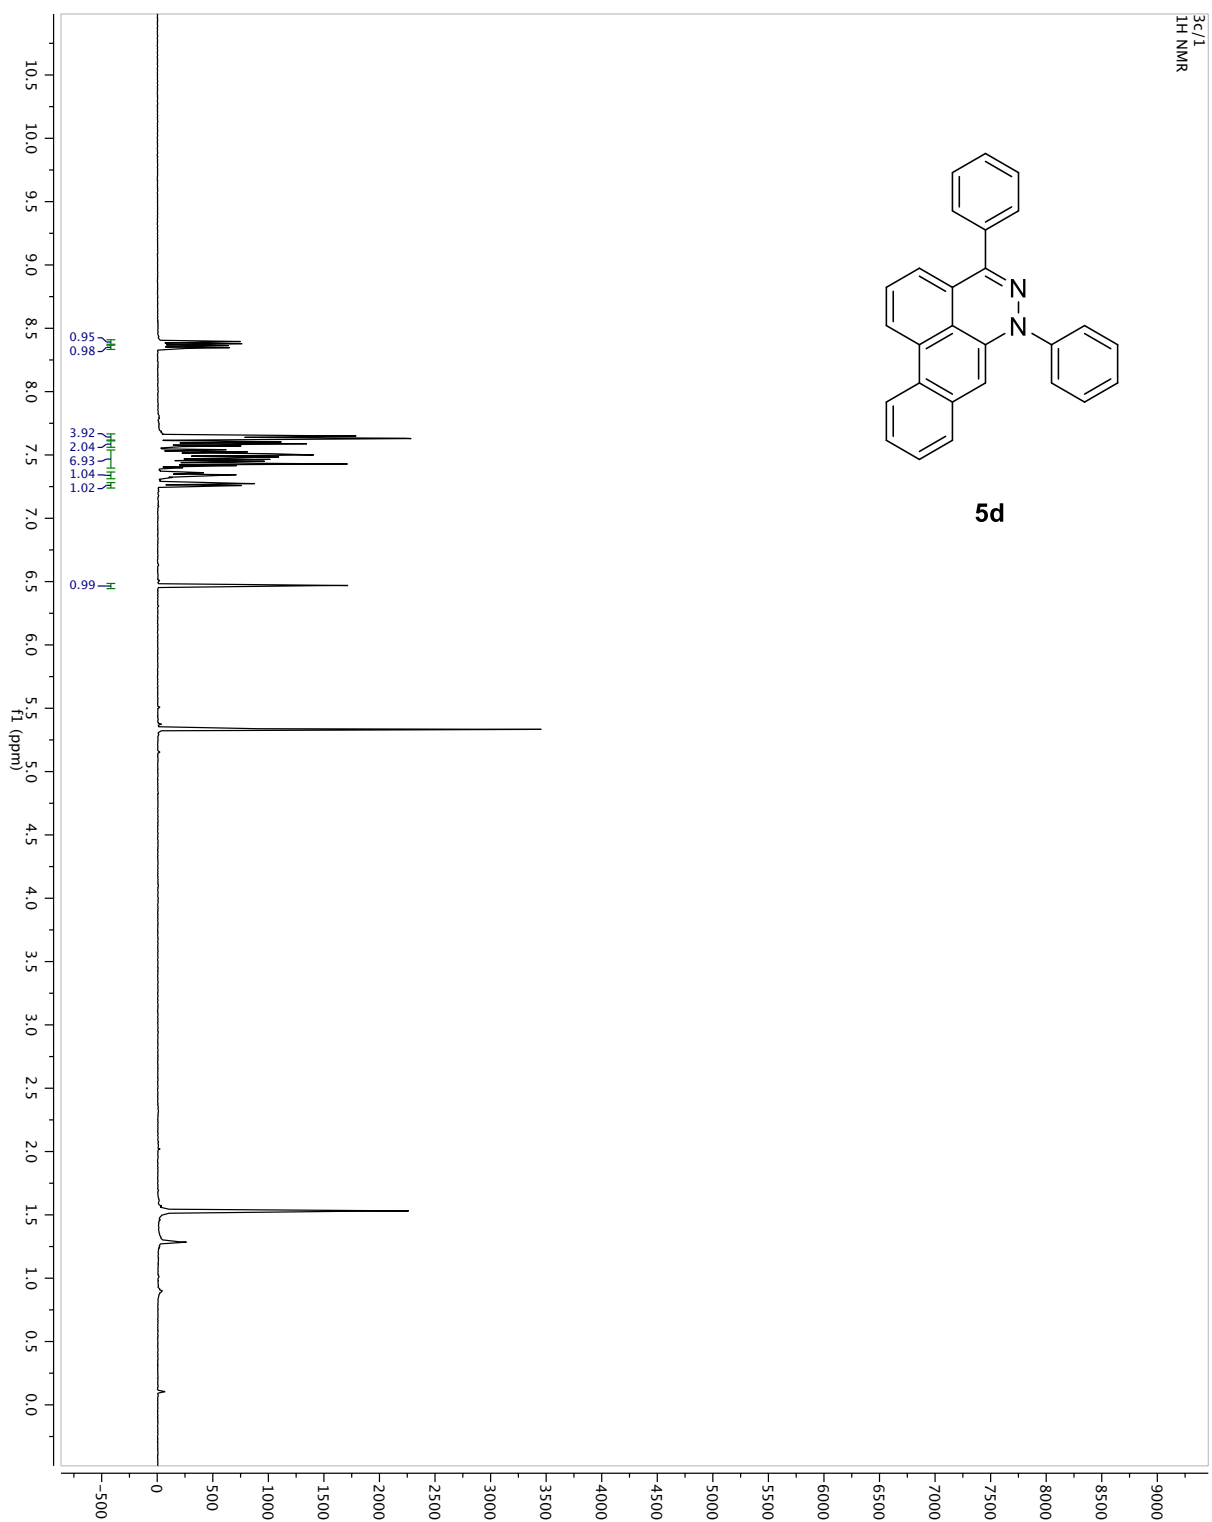

$^{13}\text{C}$  NMR spectrum of **5d** in  $\text{CD}_2\text{Cl}_2$  (125 MHz).

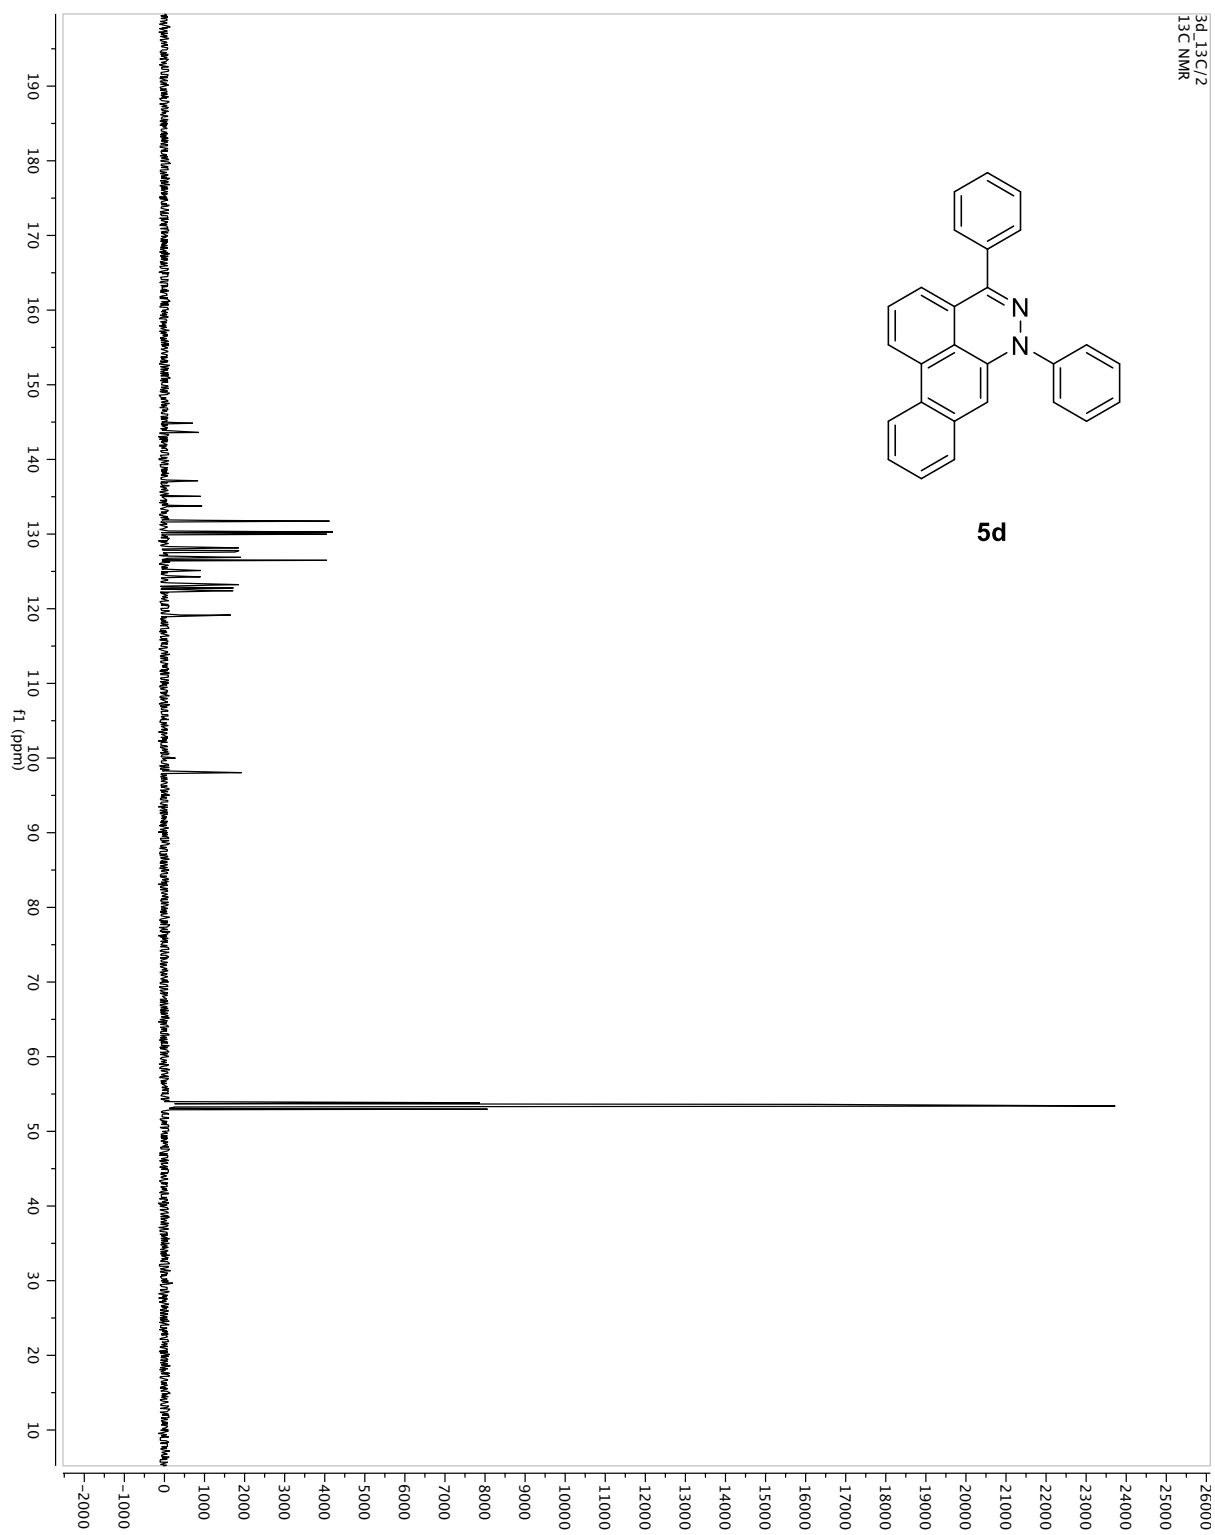



$^1\text{H}$  NMR spectrum of **5e** in  $\text{CD}_2\text{Cl}_2-d_2$  (500 MHz).

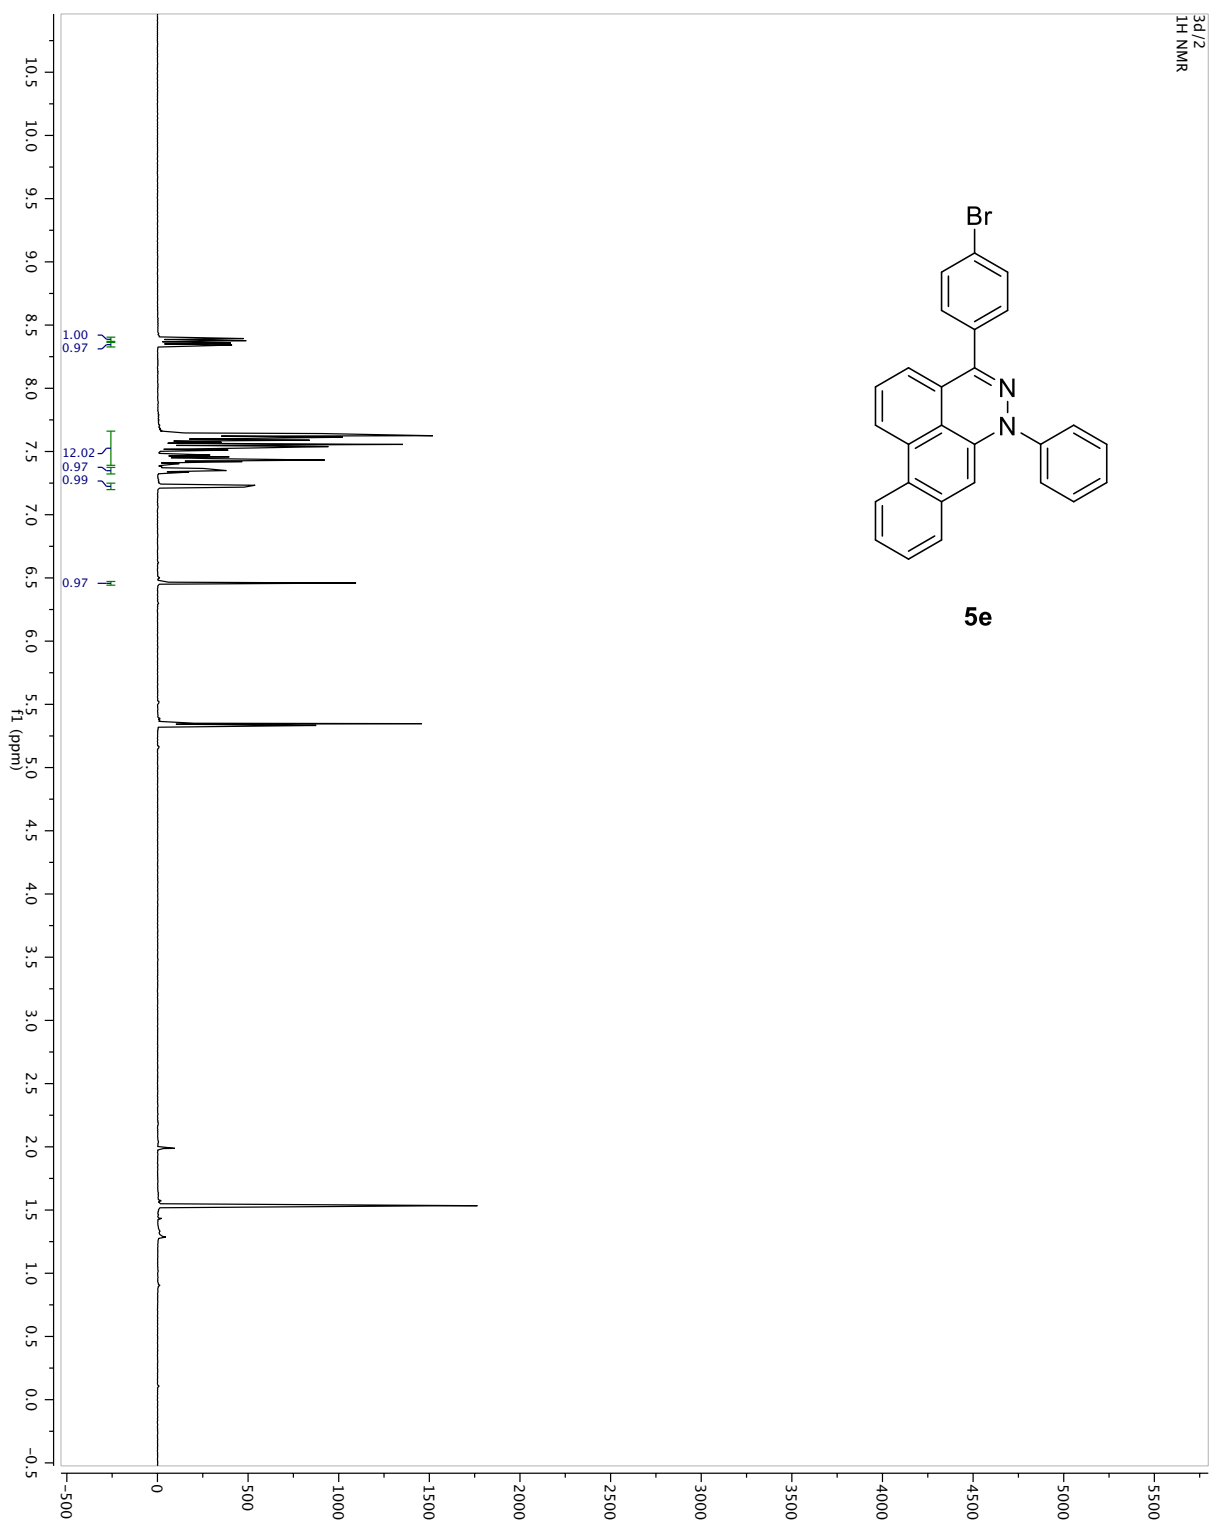

$^{13}\text{C}$  NMR spectrum of **5e** in  $\text{CD}_2\text{Cl}_2$  (125 MHz).

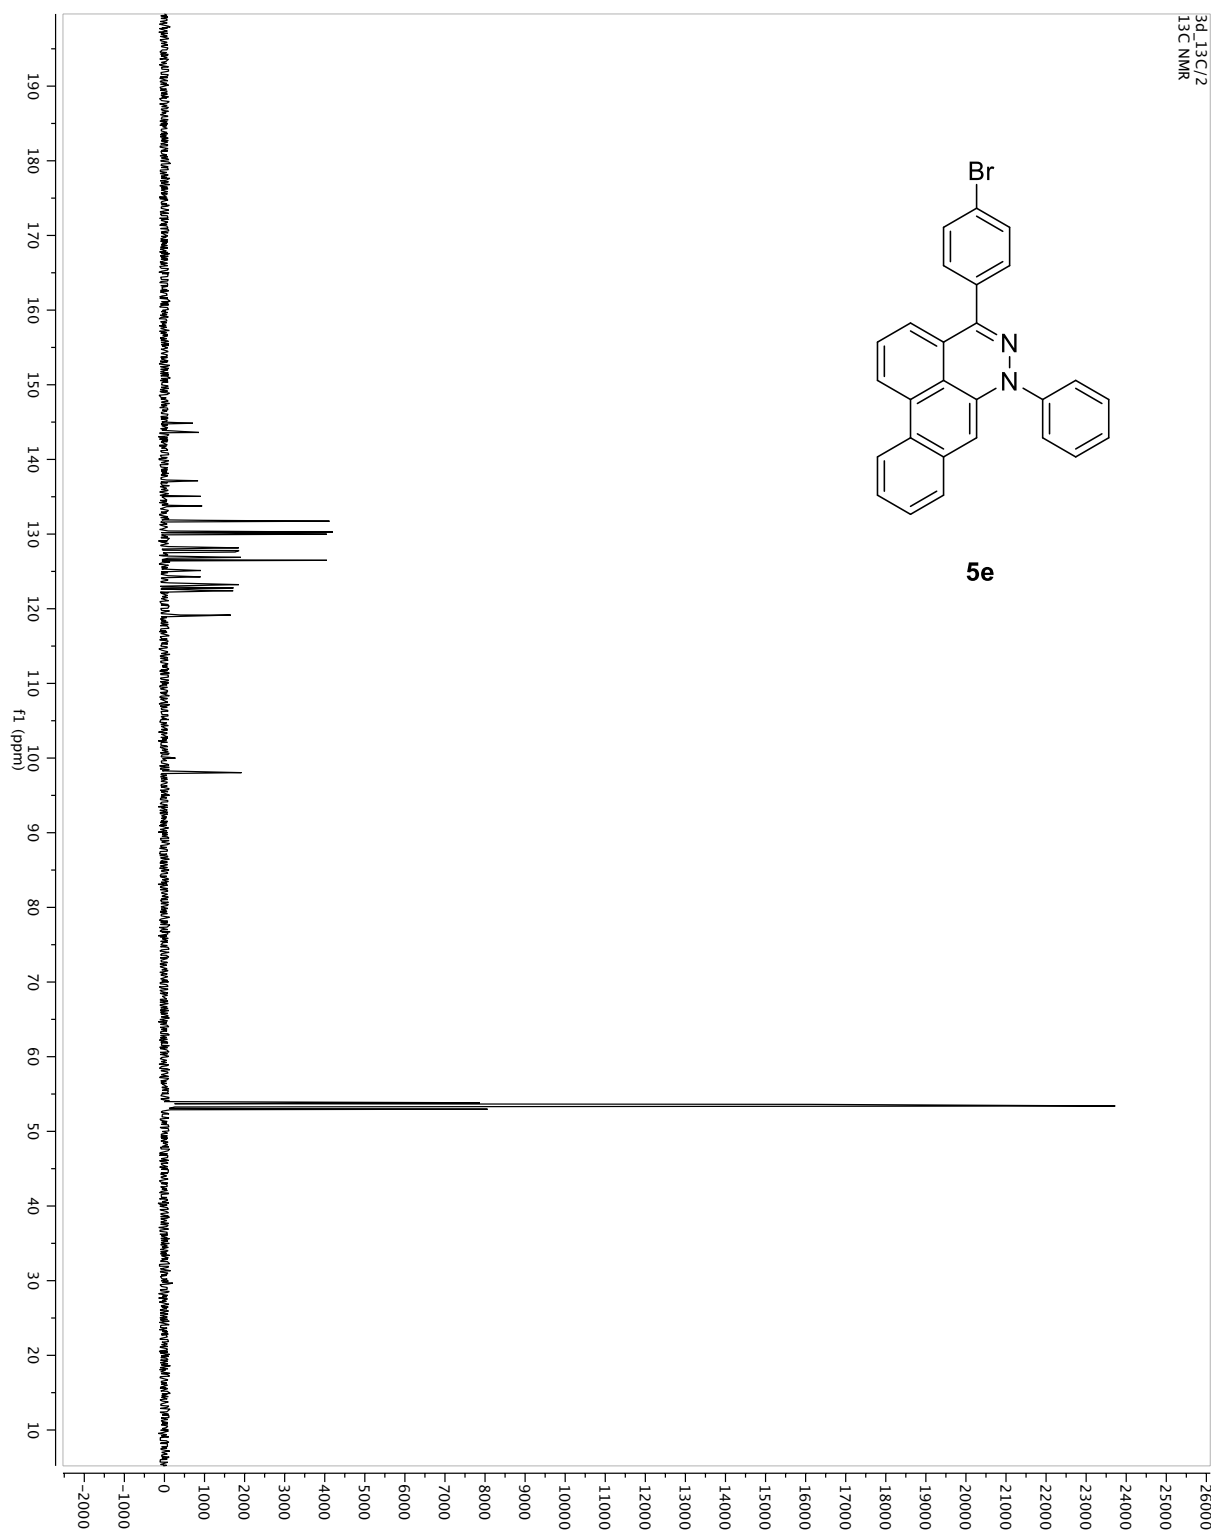

$^1\text{H}$  NMR spectrum of **5f** in  $\text{CD}_2\text{Cl}_2$  (500 MHz).

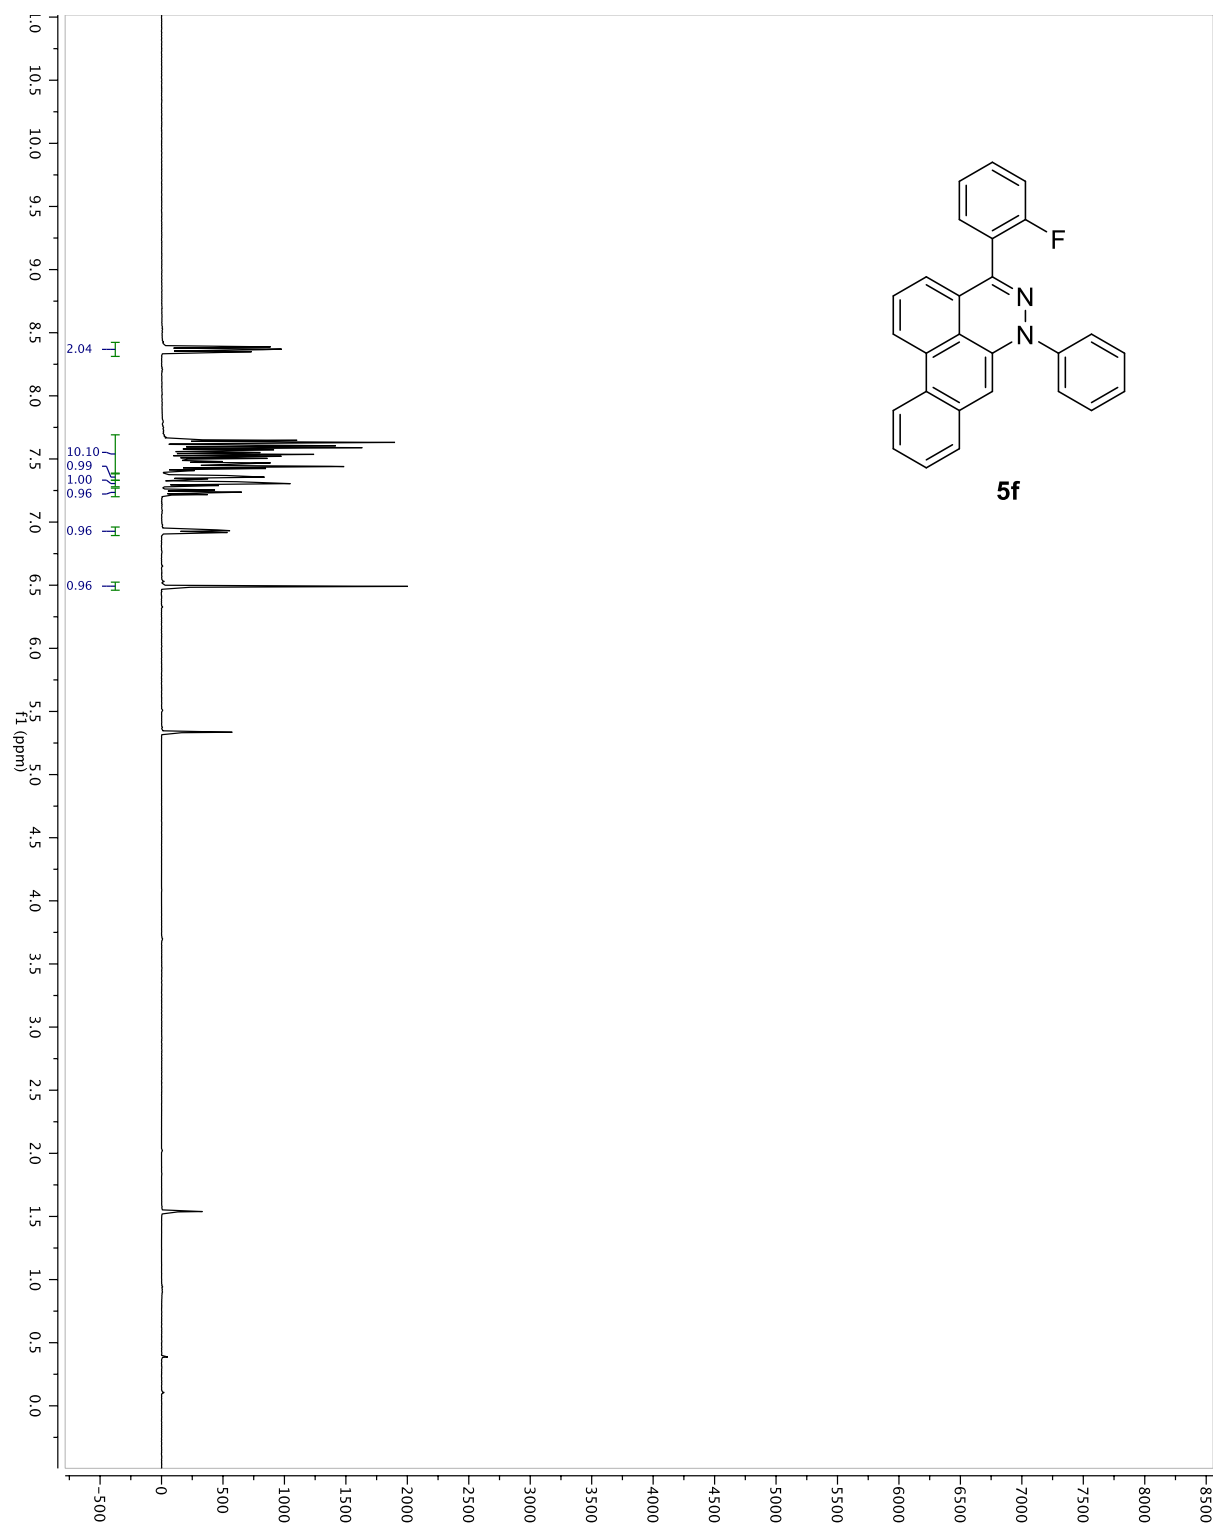

$^{13}\text{C}$  NMR spectrum of **5f** in  $\text{CD}_2\text{Cl}_2$  (125 MHz).

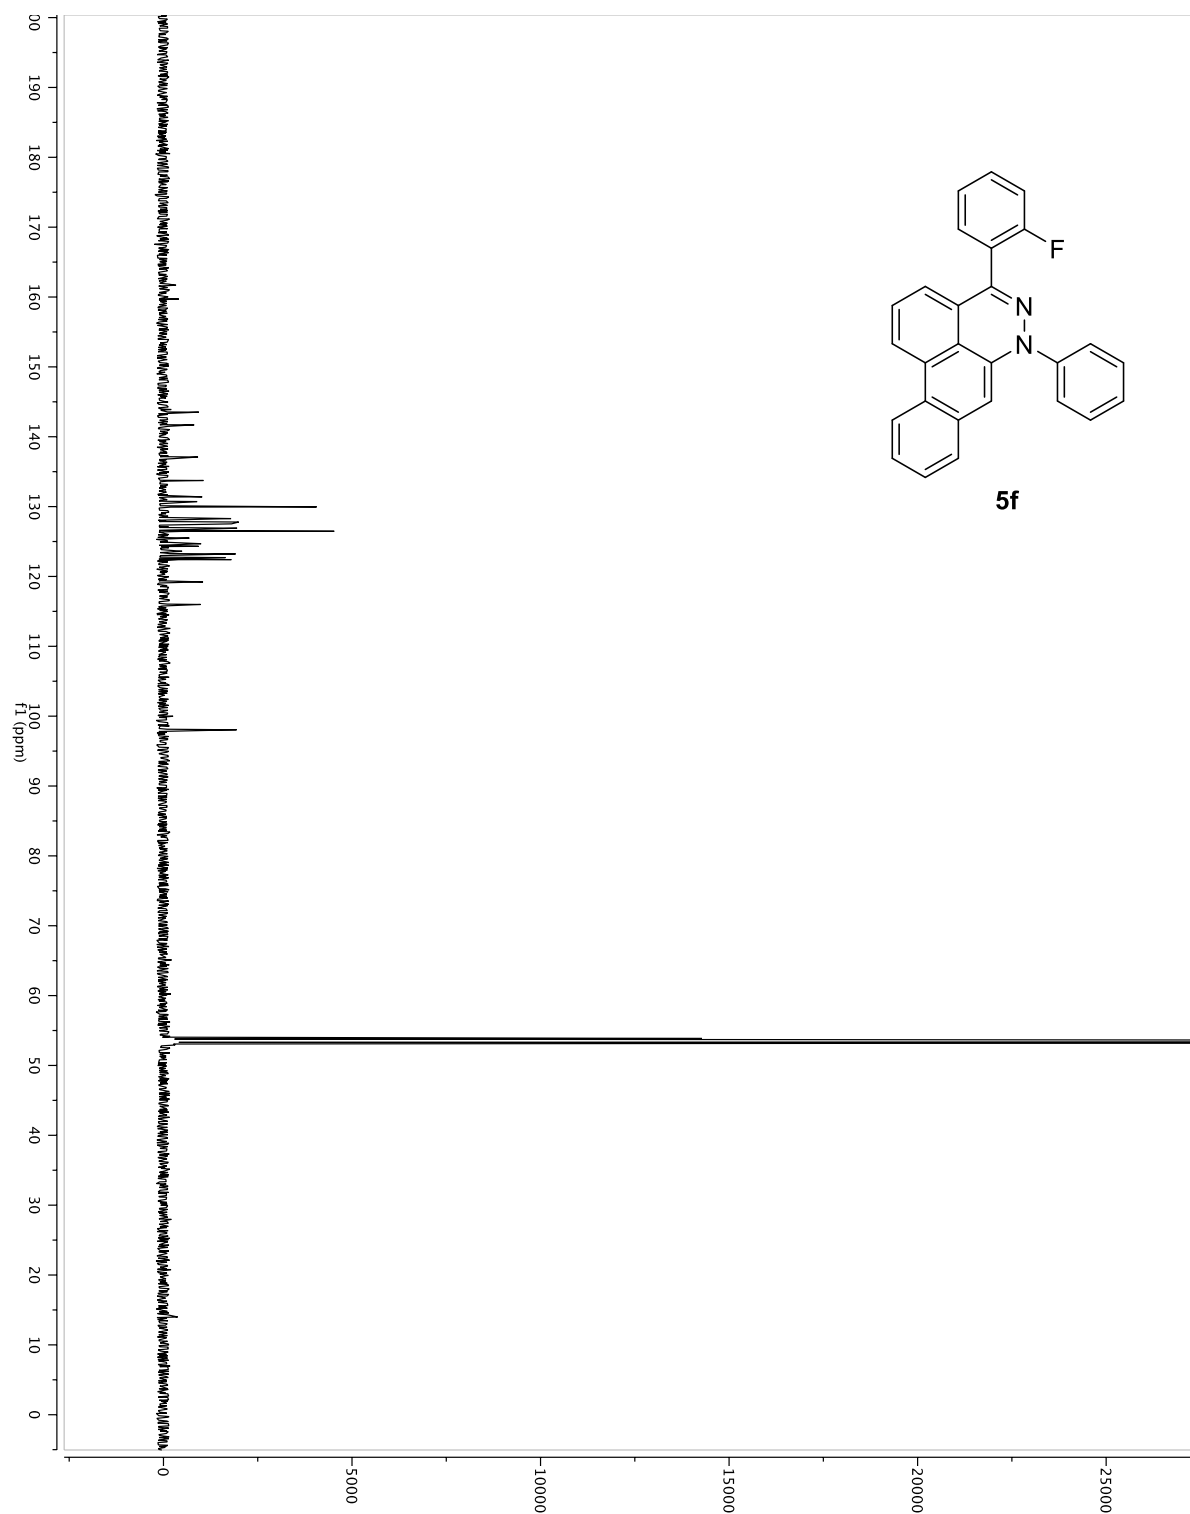

$^{19}\text{F}$  NMR spectrum of **5f** in  $\text{CD}_2\text{Cl}_2$  (338 MHz).

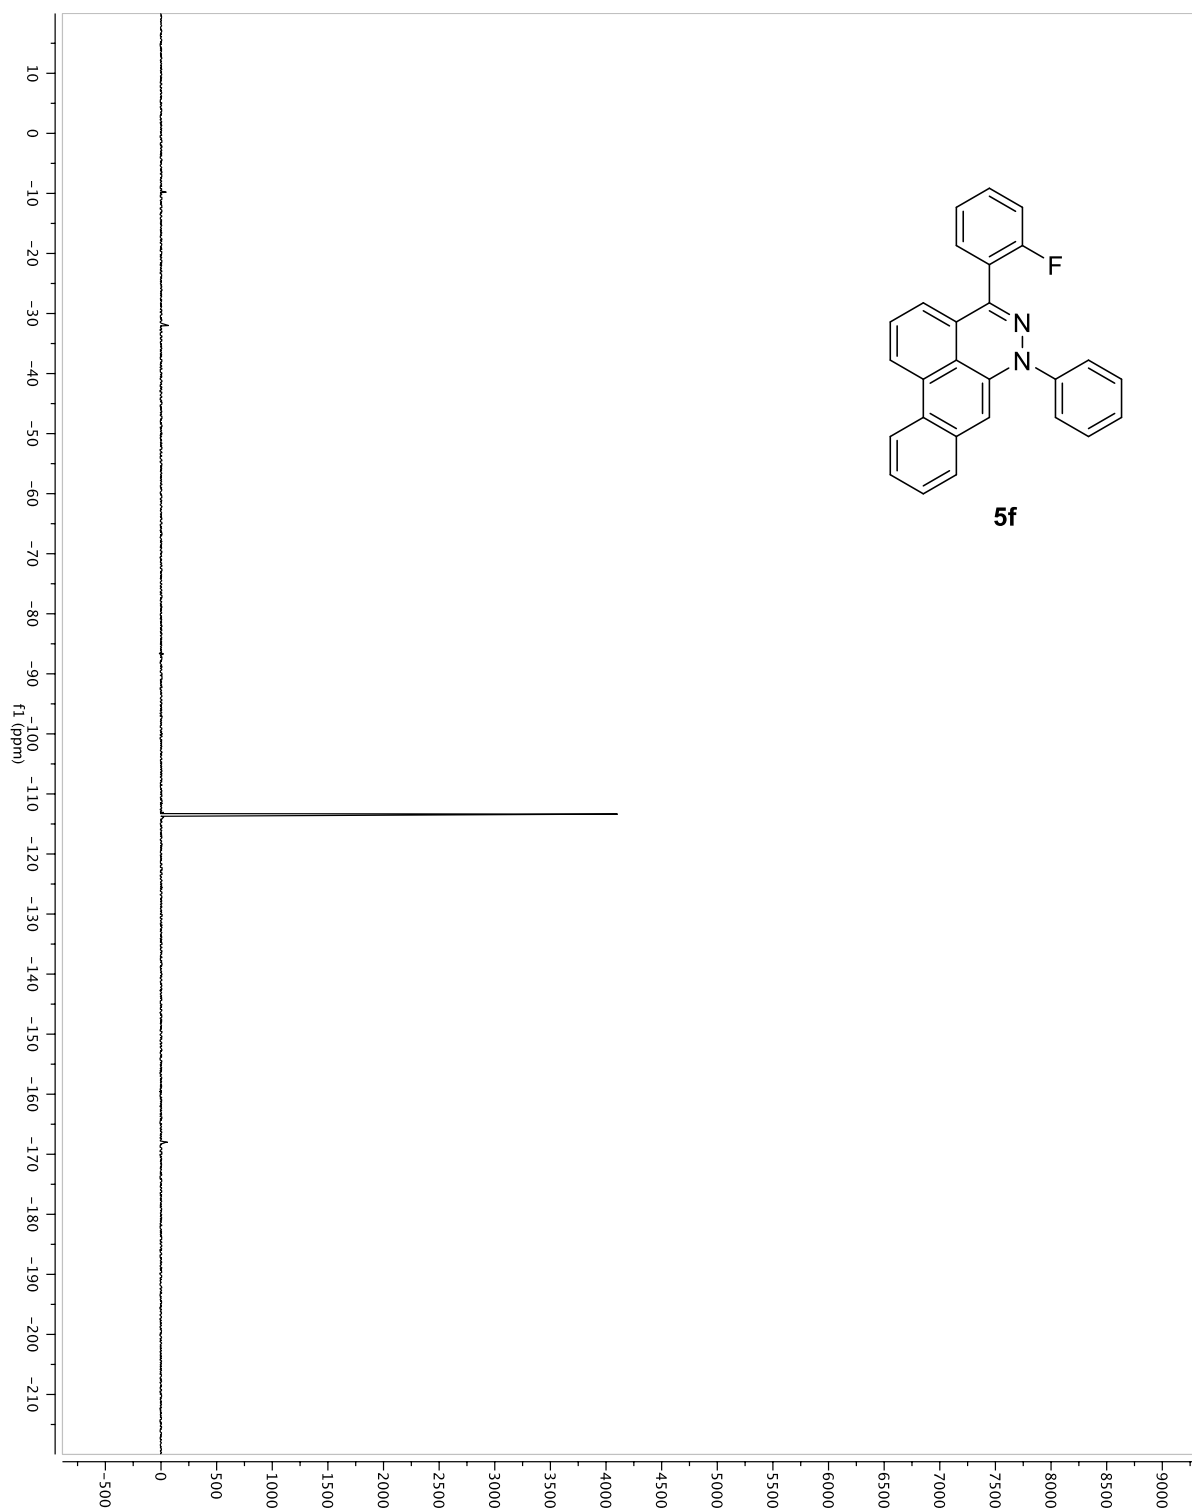

$^1\text{H}$  NMR spectrum of **5g** in  $\text{CD}_2\text{Cl}_2$  (500 MHz).

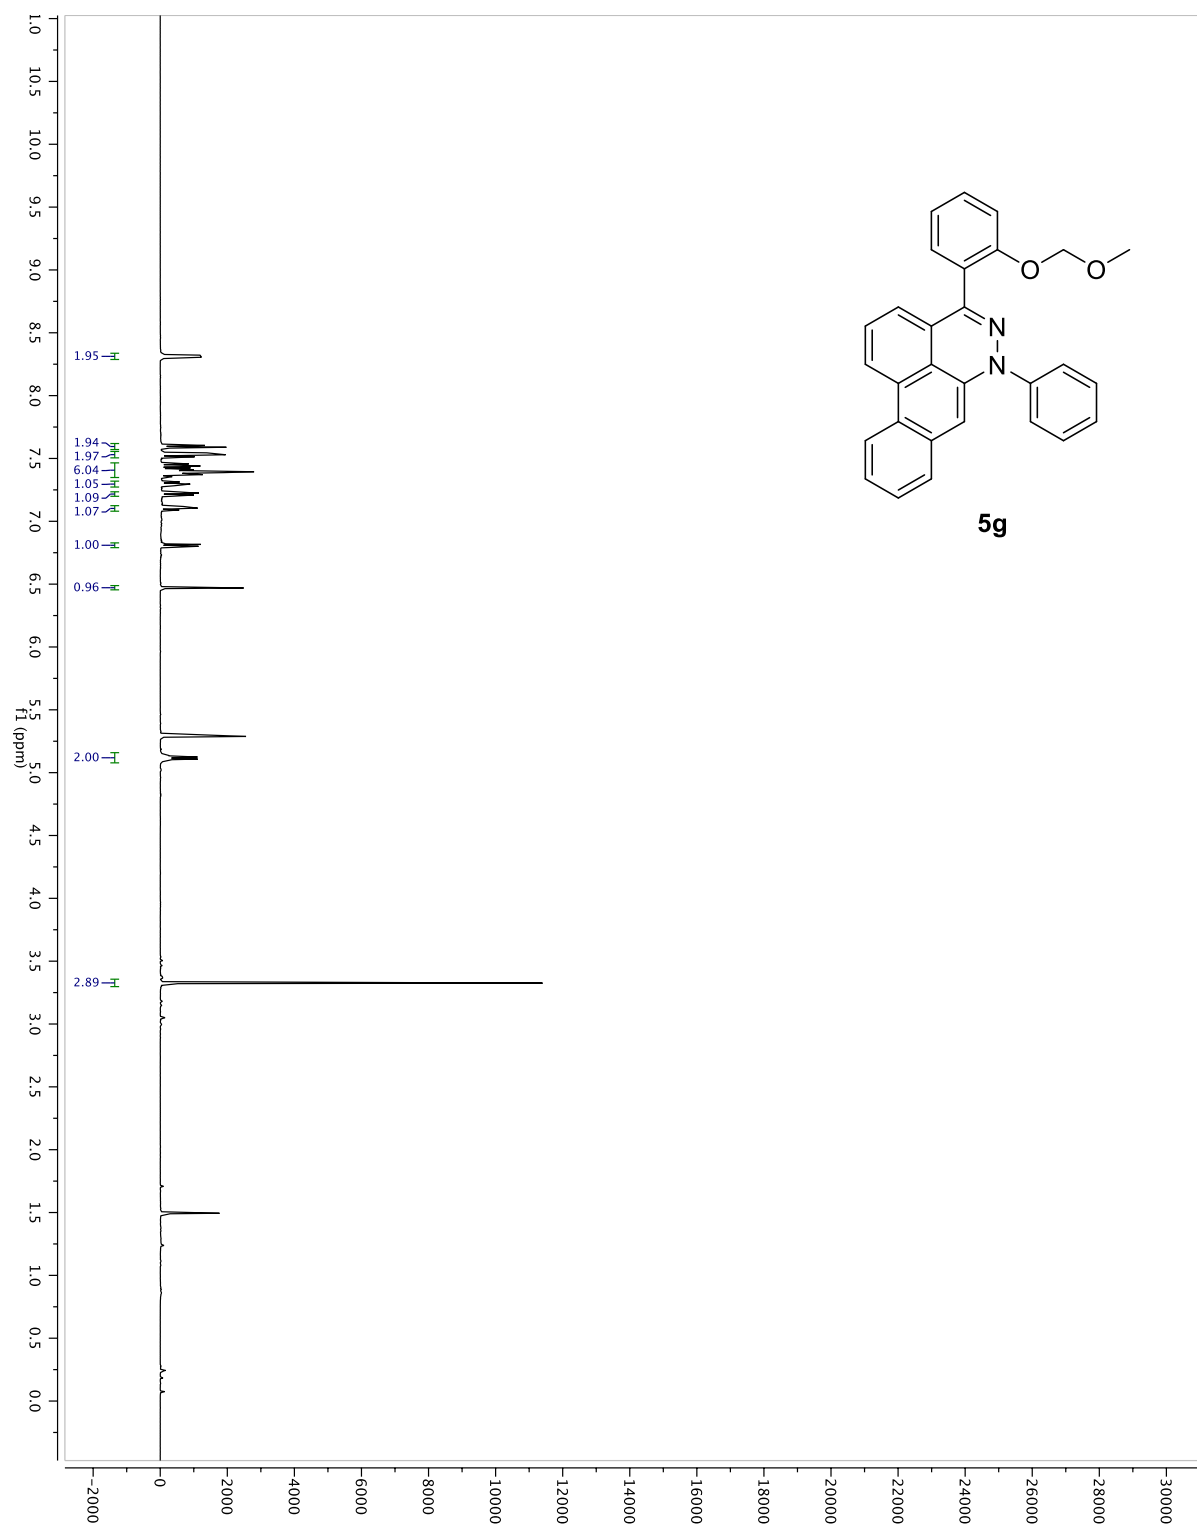

$^{13}\text{C}$  NMR spectrum of **5g** in  $\text{CD}_2\text{Cl}_2$  (125 MHz).

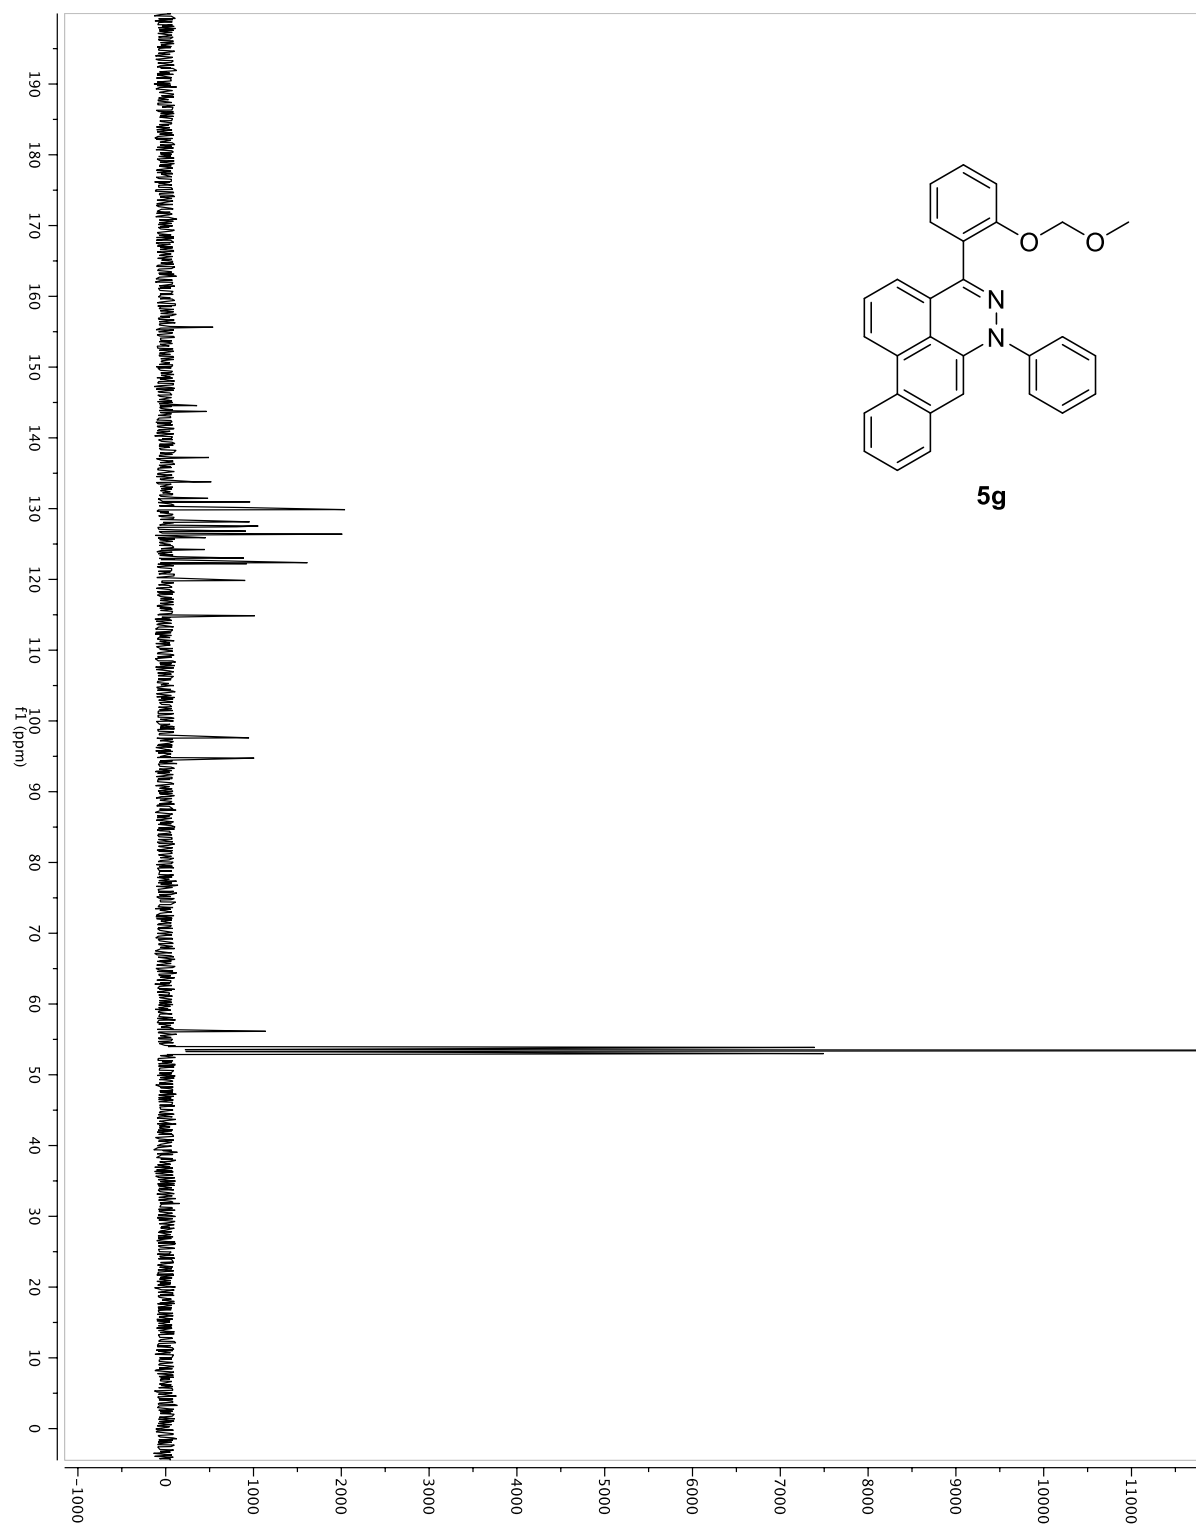

$^1\text{H}$  NMR spectrum of **5h** in  $\text{CD}_2\text{Cl}_2$  (500 MHz).

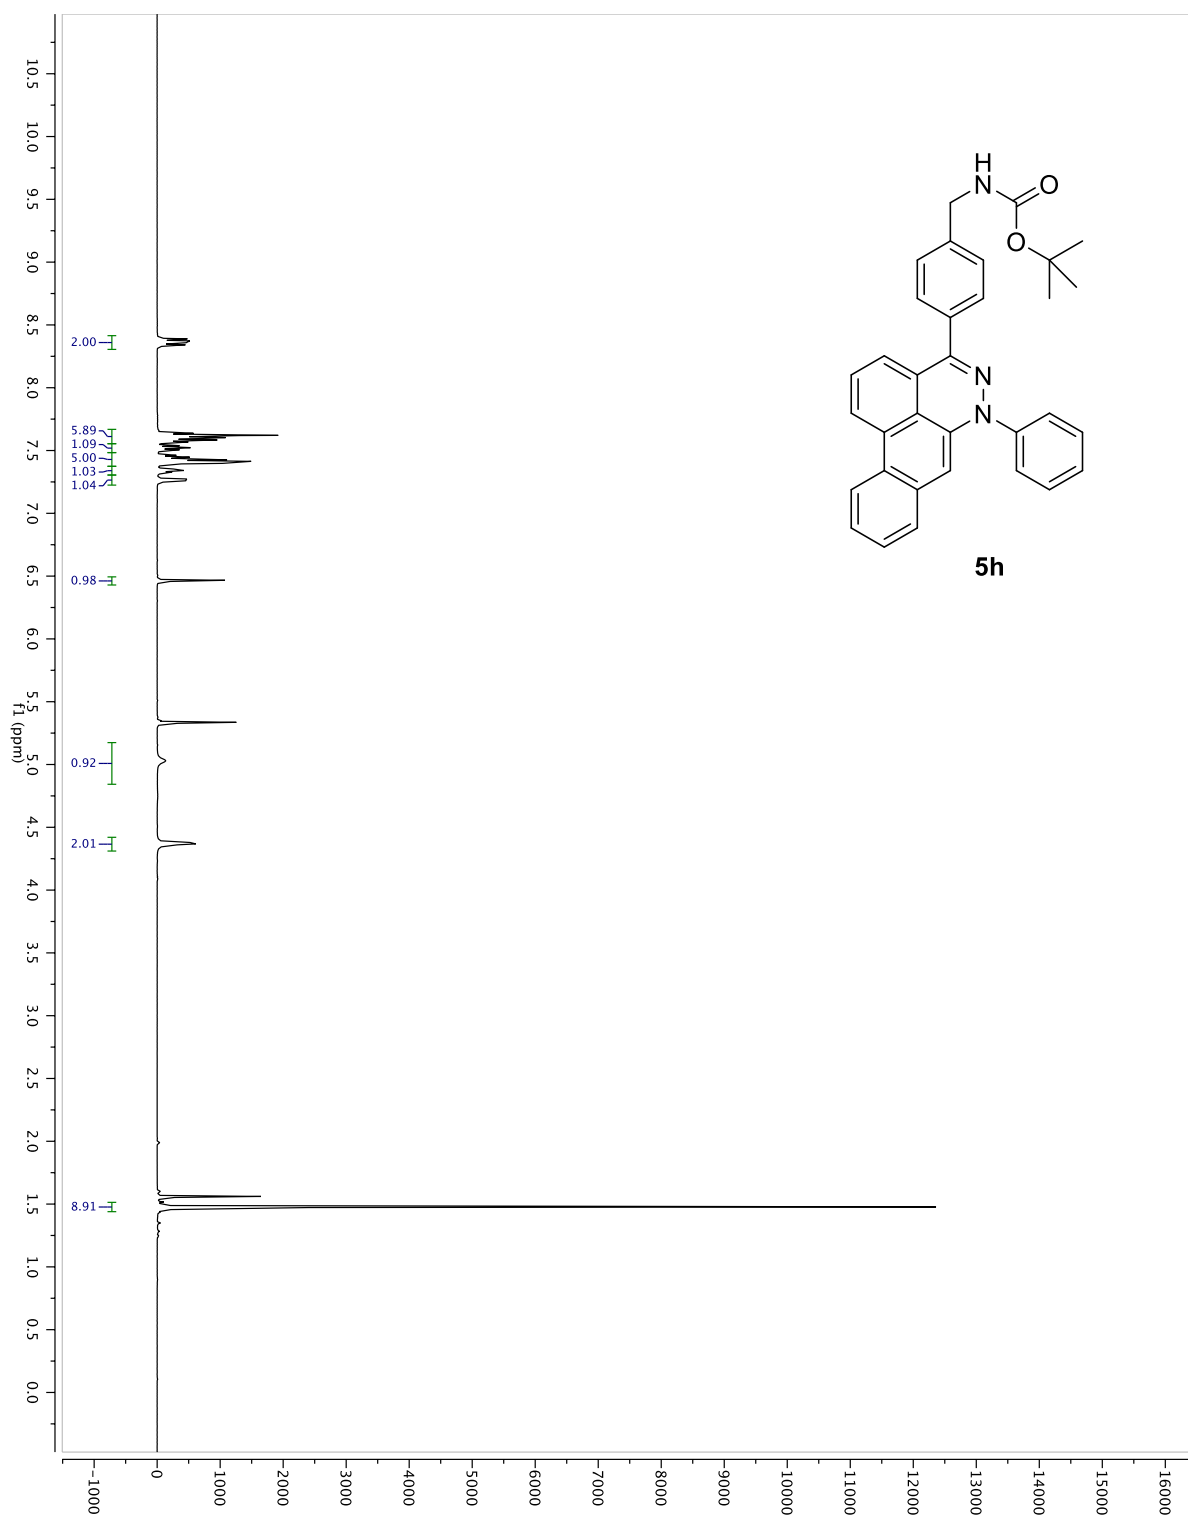



$^{13}\text{C}$  NMR spectrum of **5h** in  $\text{CD}_2\text{Cl}_2$  (125 MHz).

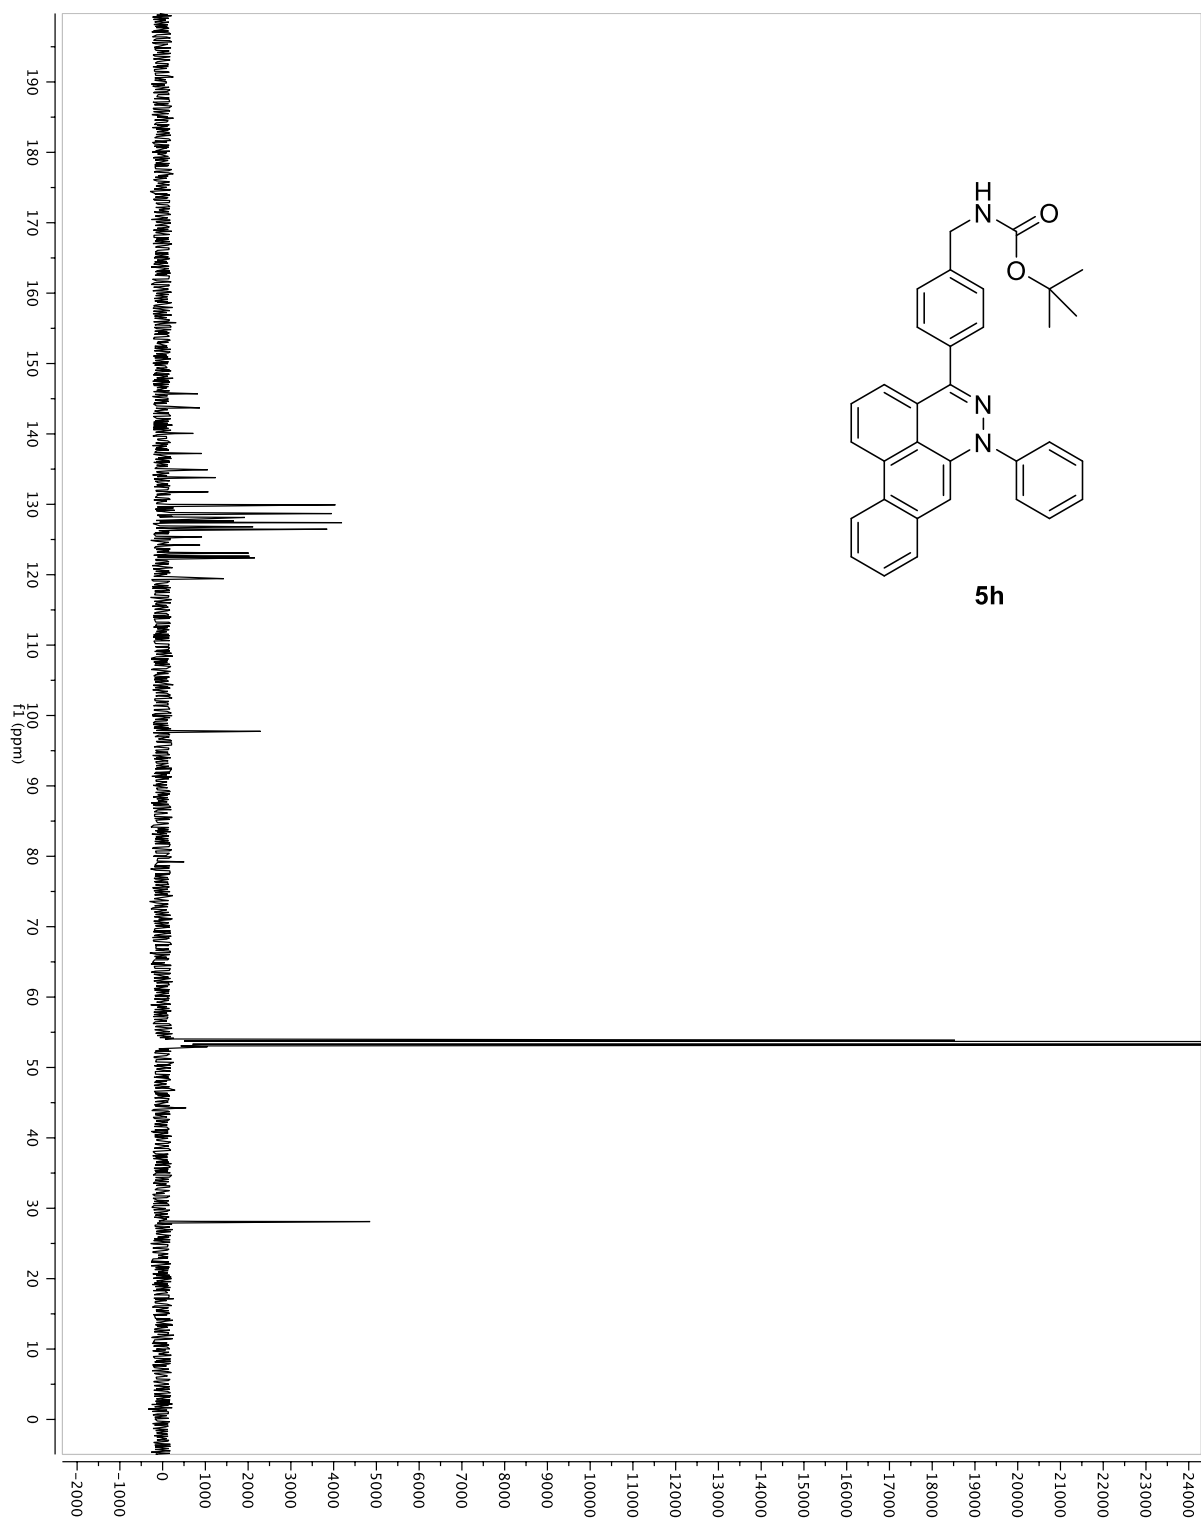

$^1\text{H}$  NMR spectrum of **5i** in  $\text{CD}_2\text{Cl}_2$  (500 MHz).

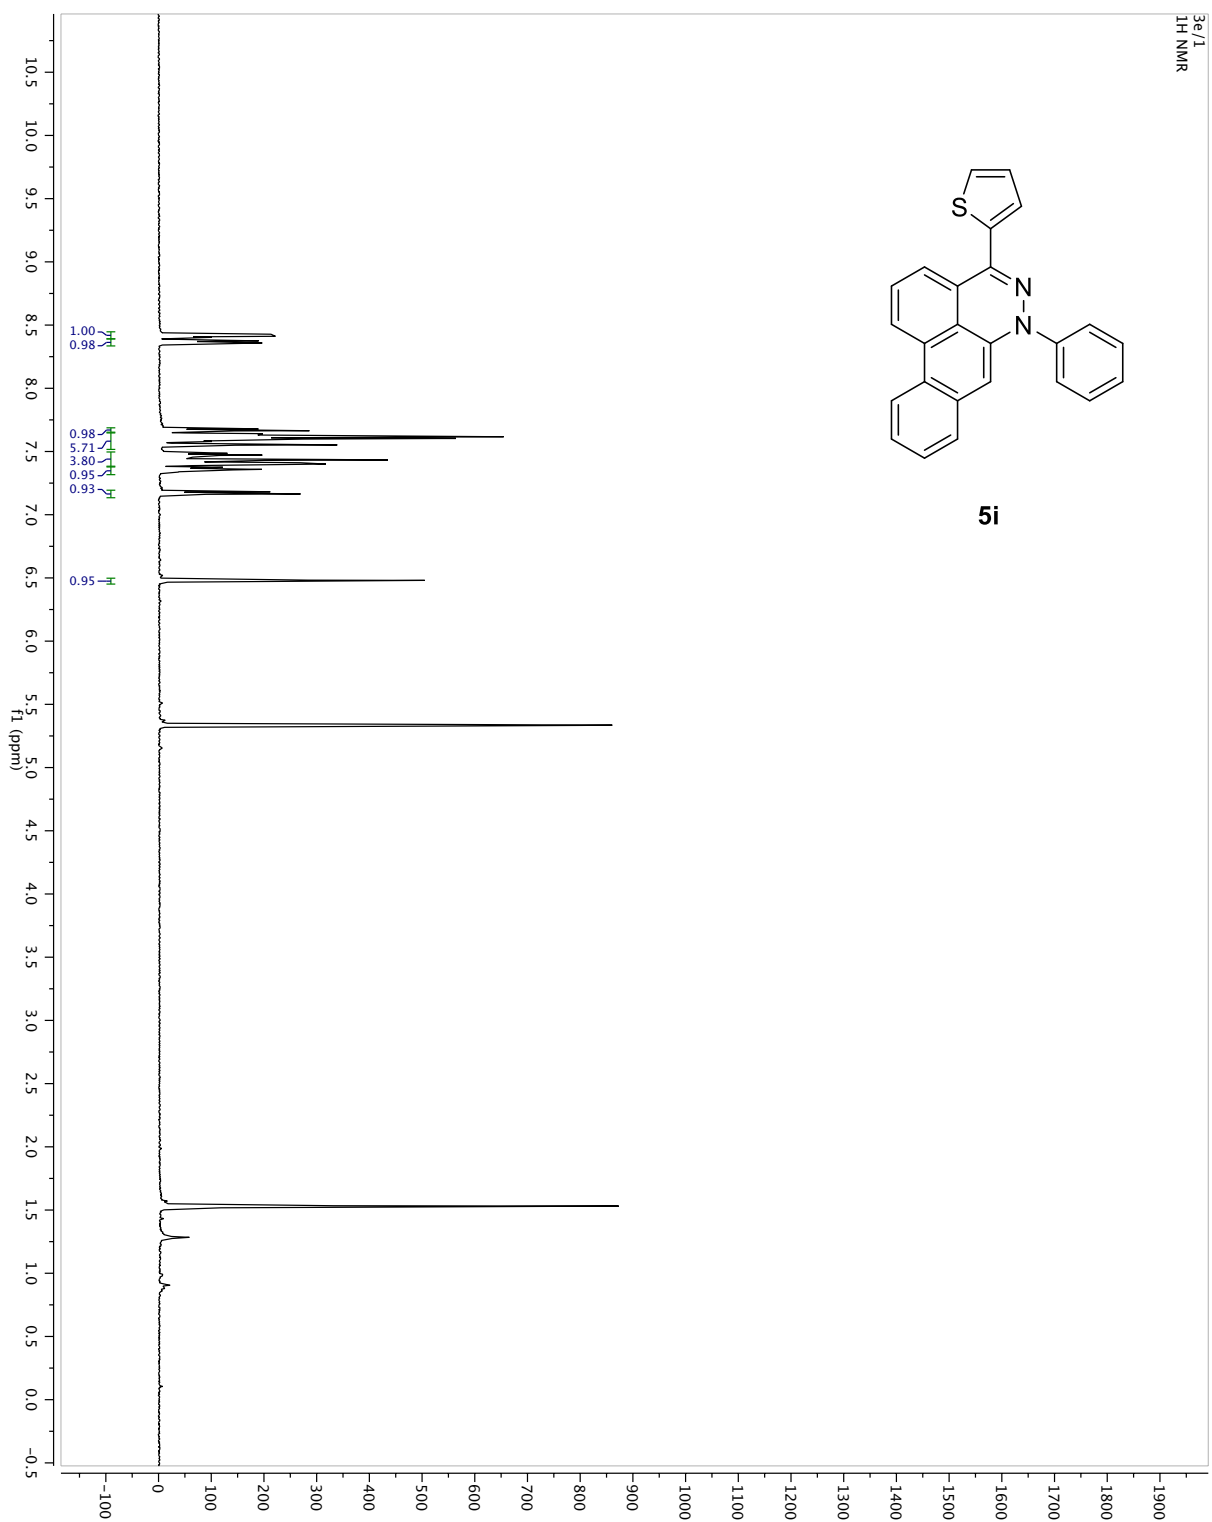

$^{13}\text{C}$  NMR spectrum of **5i** in  $\text{CD}_2\text{Cl}_2$  (125 MHz).

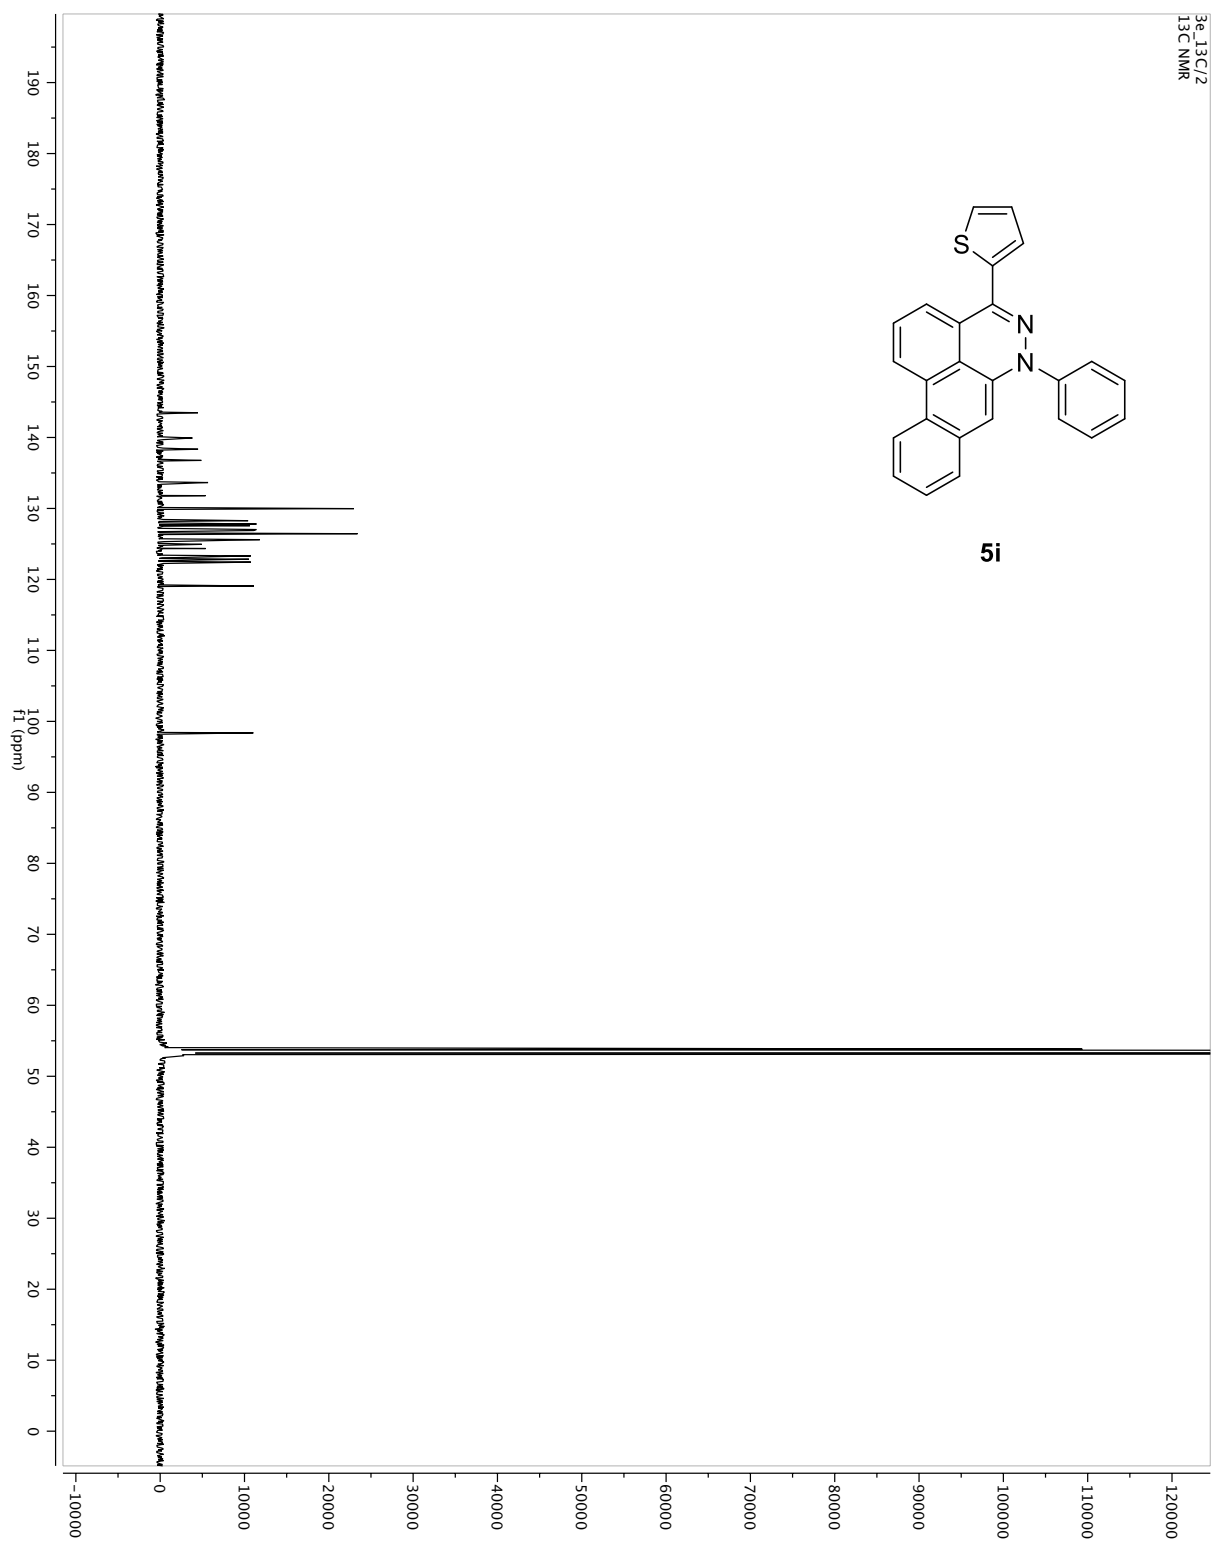

$^1\text{H}$  NMR spectrum of **5j** in  $\text{CD}_2\text{Cl}_2$  (500 MHz).

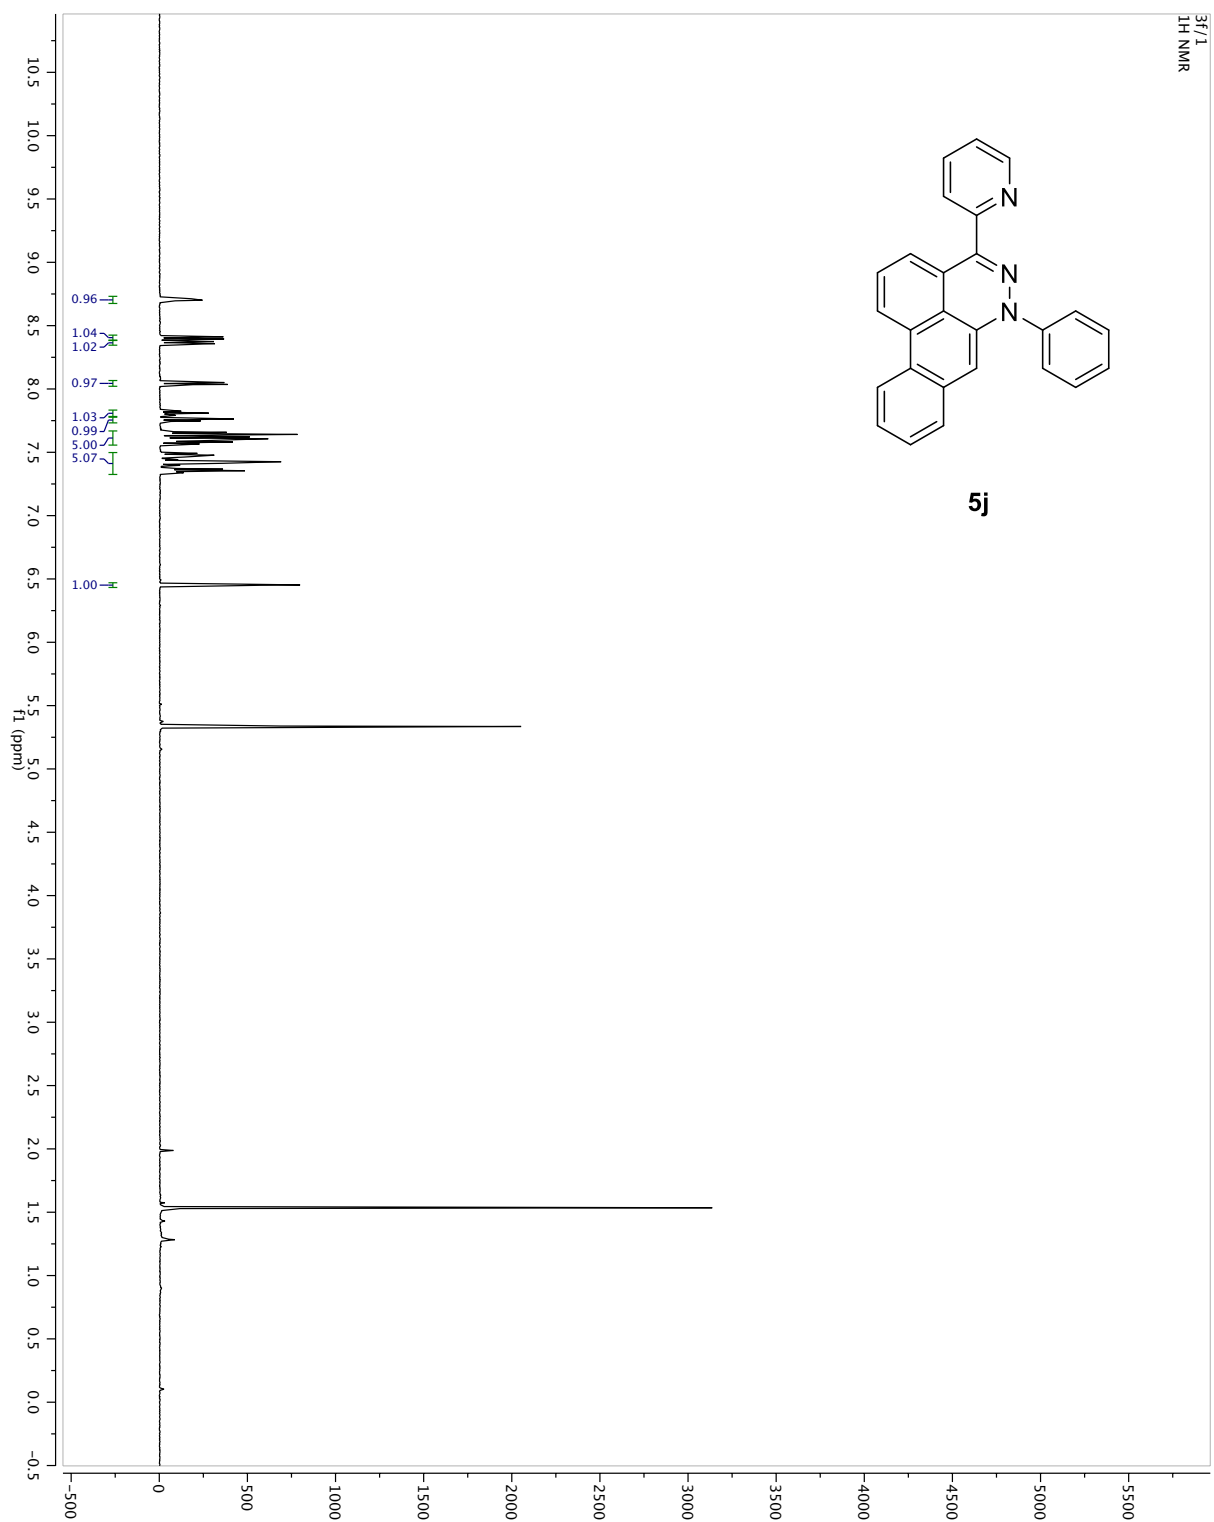

$^{13}\text{C}$  NMR spectrum of **5j** in  $\text{CD}_2\text{Cl}_2$  (125 MHz).

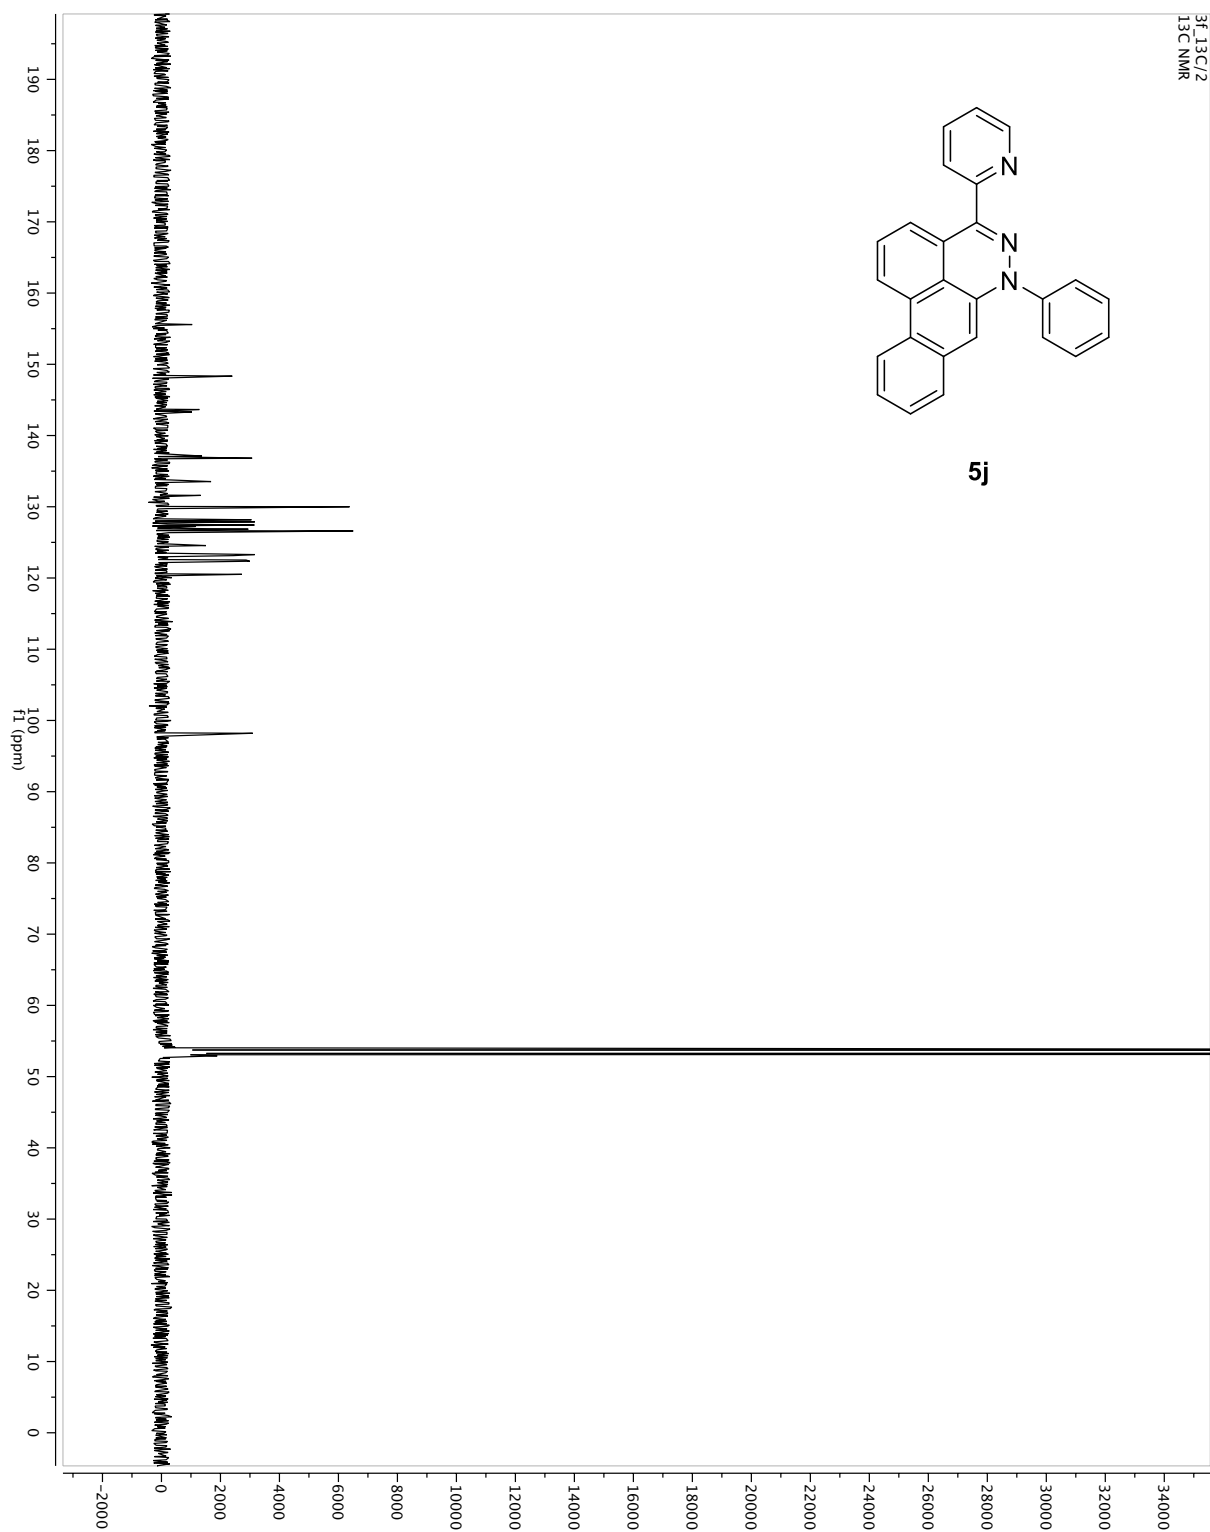

$^1\text{H}$  NMR spectrum of **5k** in  $\text{CD}_2\text{Cl}_2$  (500 MHz).

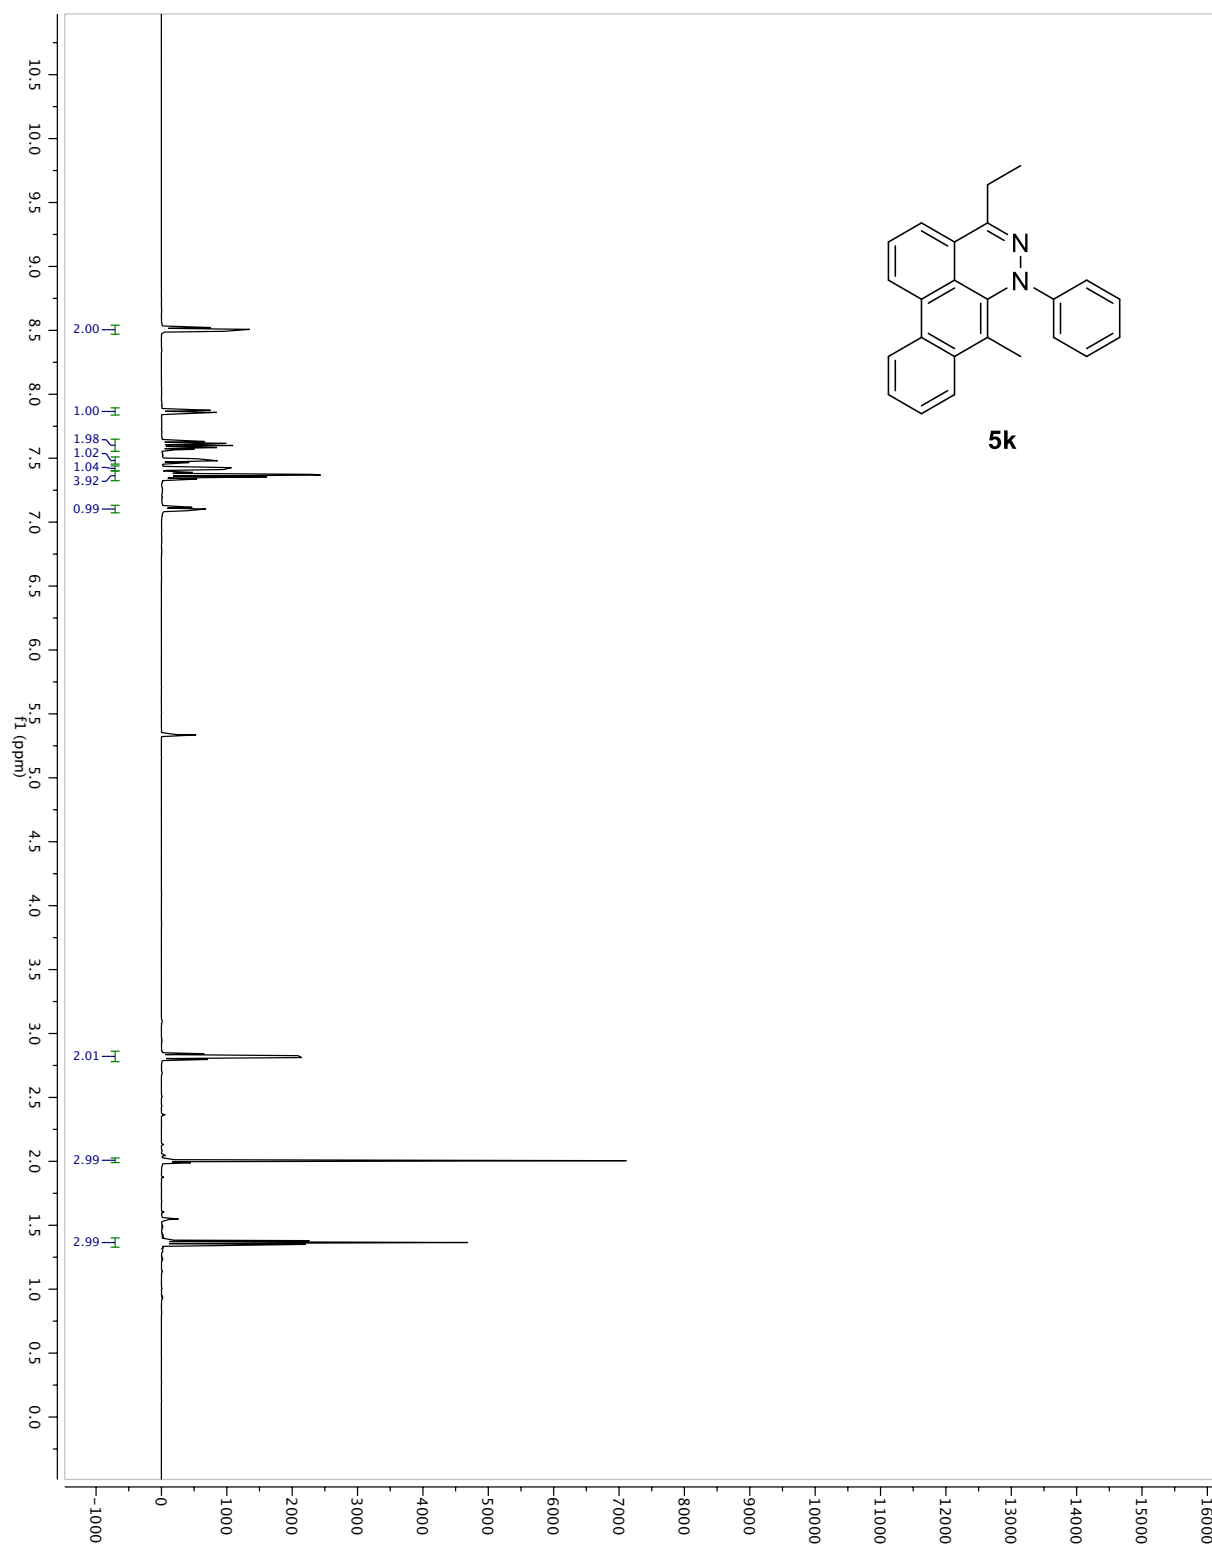

$^{13}\text{C}$  NMR spectrum of **5k** in  $\text{CD}_2\text{Cl}_2$  (125 MHz).

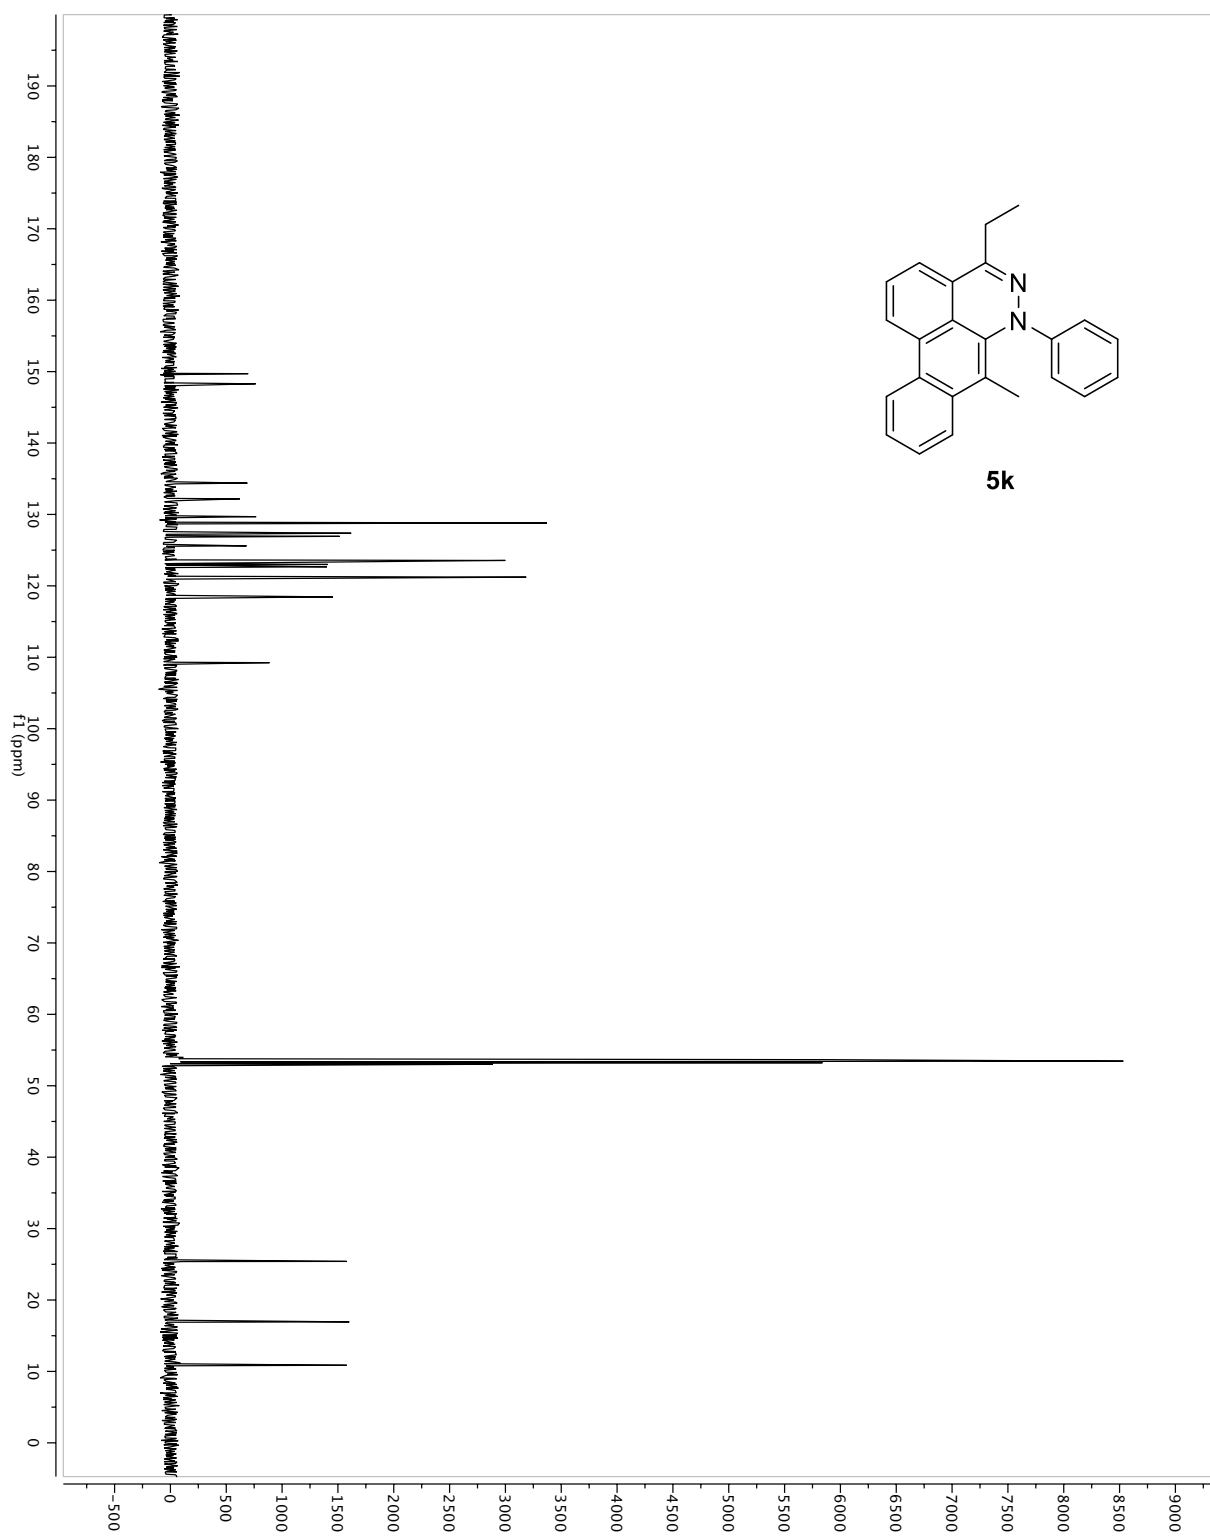

$^1\text{H}$  NMR spectrum of **5I** in  $\text{CD}_2\text{Cl}_2$  (500 MHz).

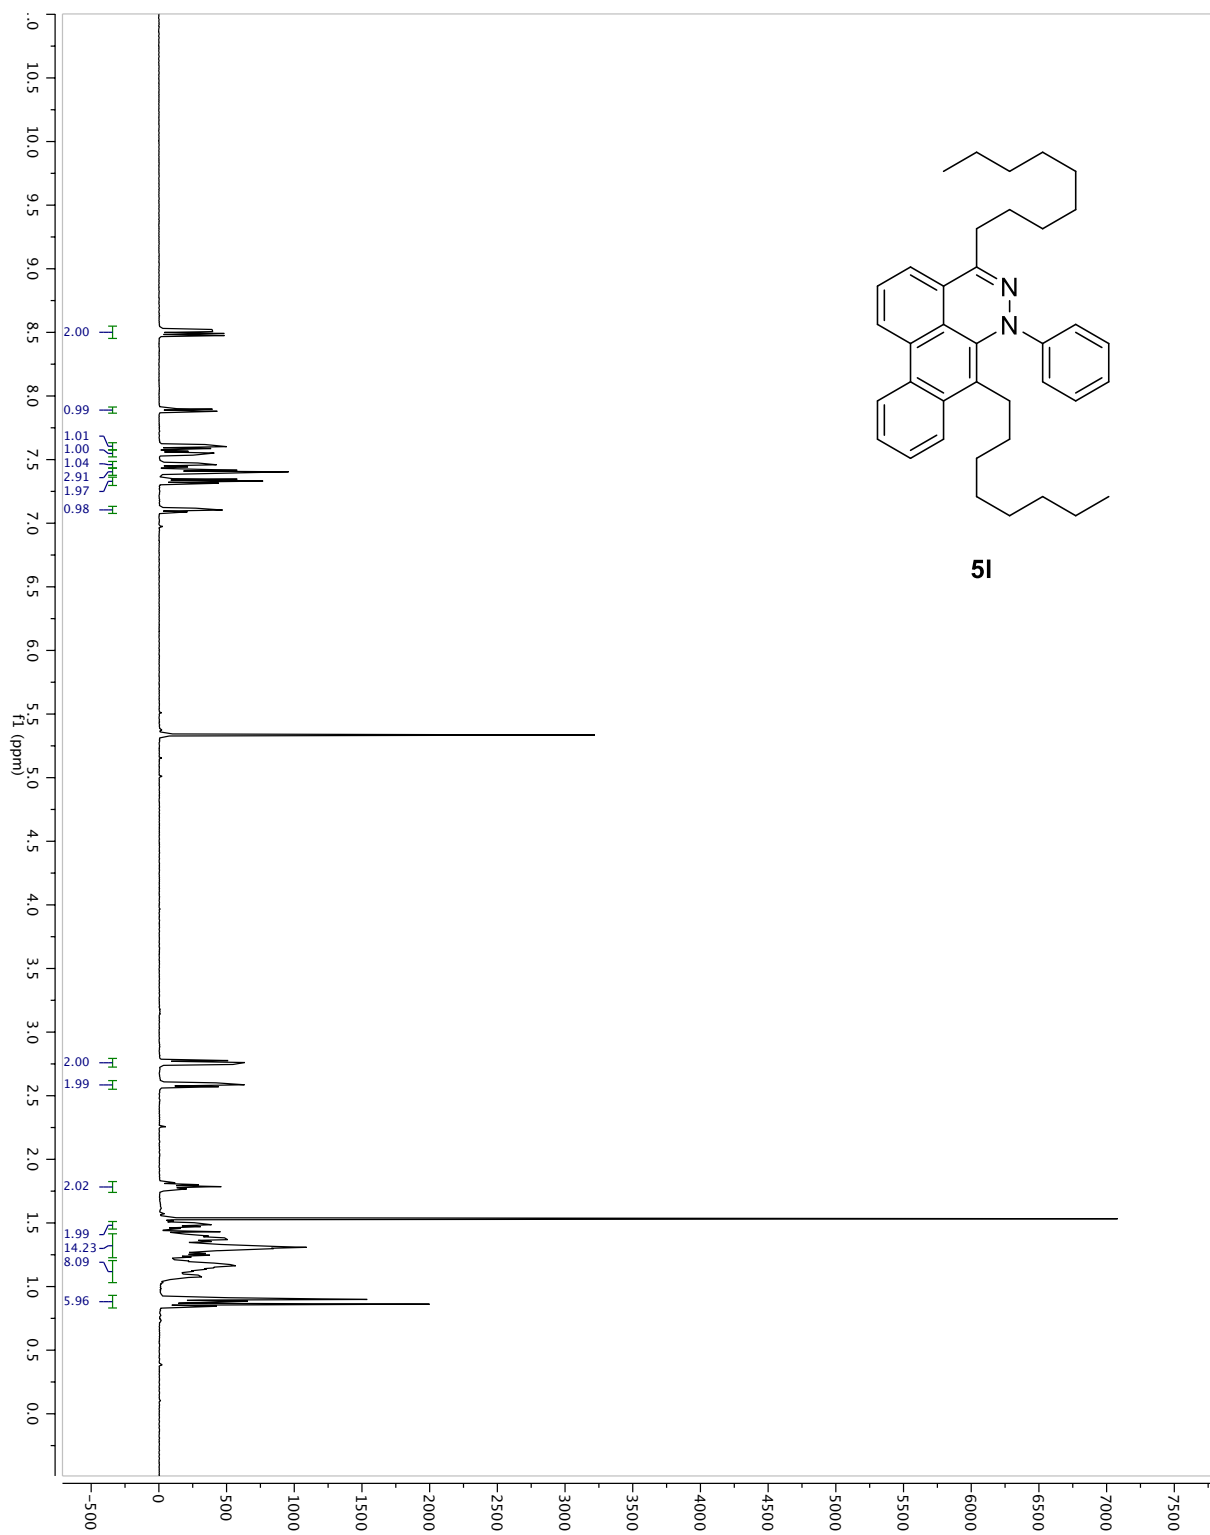



<sup>13</sup>C NMR spectrum of **5l** in CD<sub>2</sub>Cl<sub>2</sub> (125 MHz).

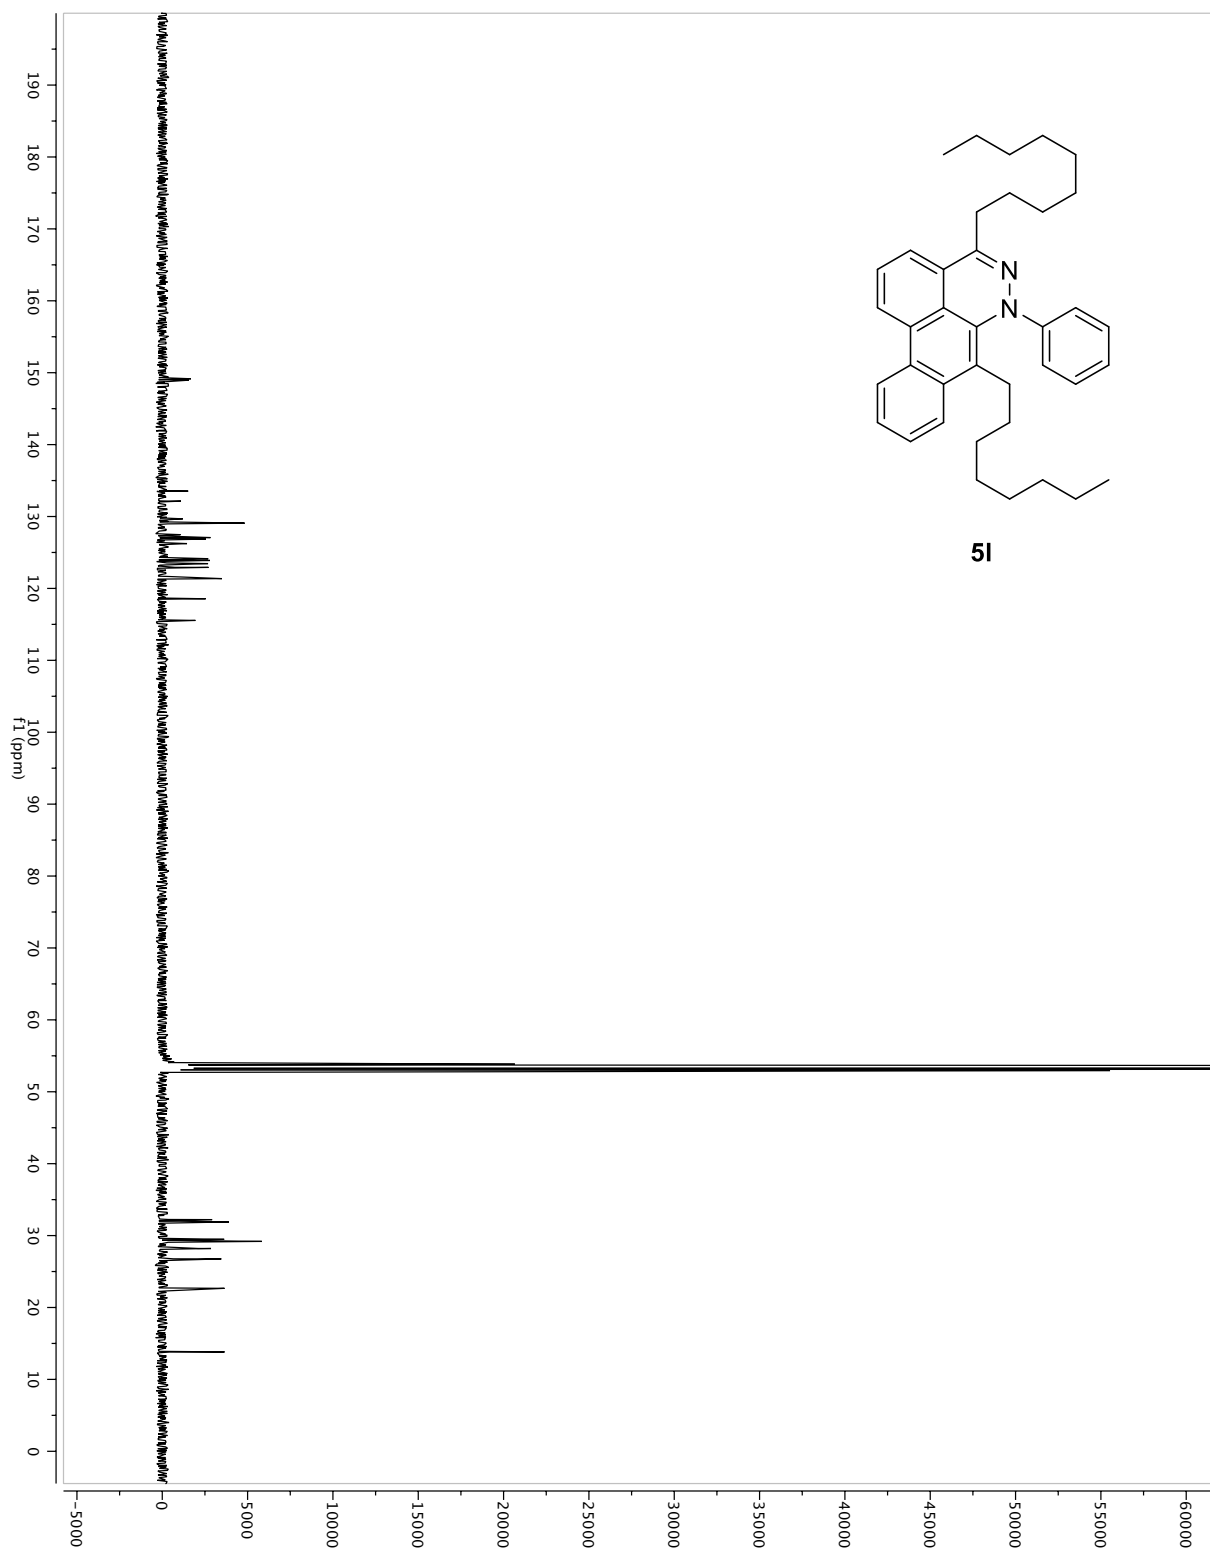

$^1\text{H}$  NMR spectrum of **5m** in  $\text{CD}_2\text{Cl}_2$  (500 MHz).

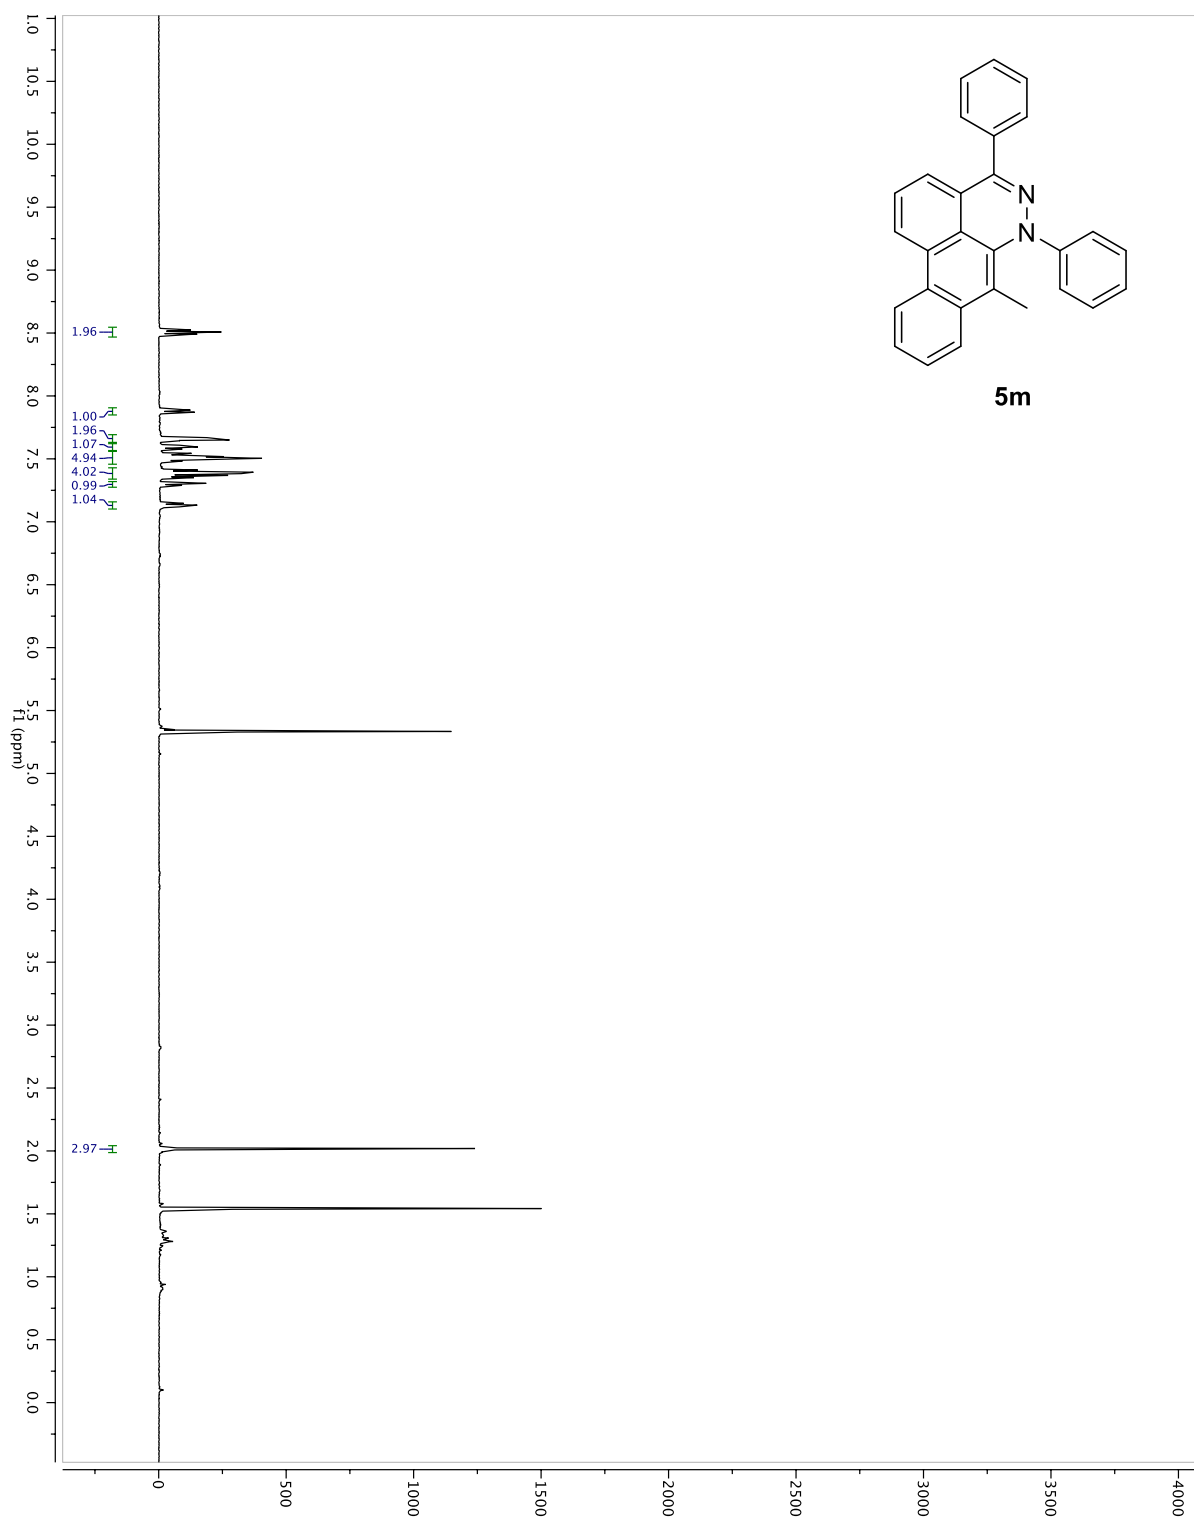

$^{13}\text{C}$  NMR spectrum of **5m** in  $\text{CD}_2\text{Cl}_2$  (125 MHz).

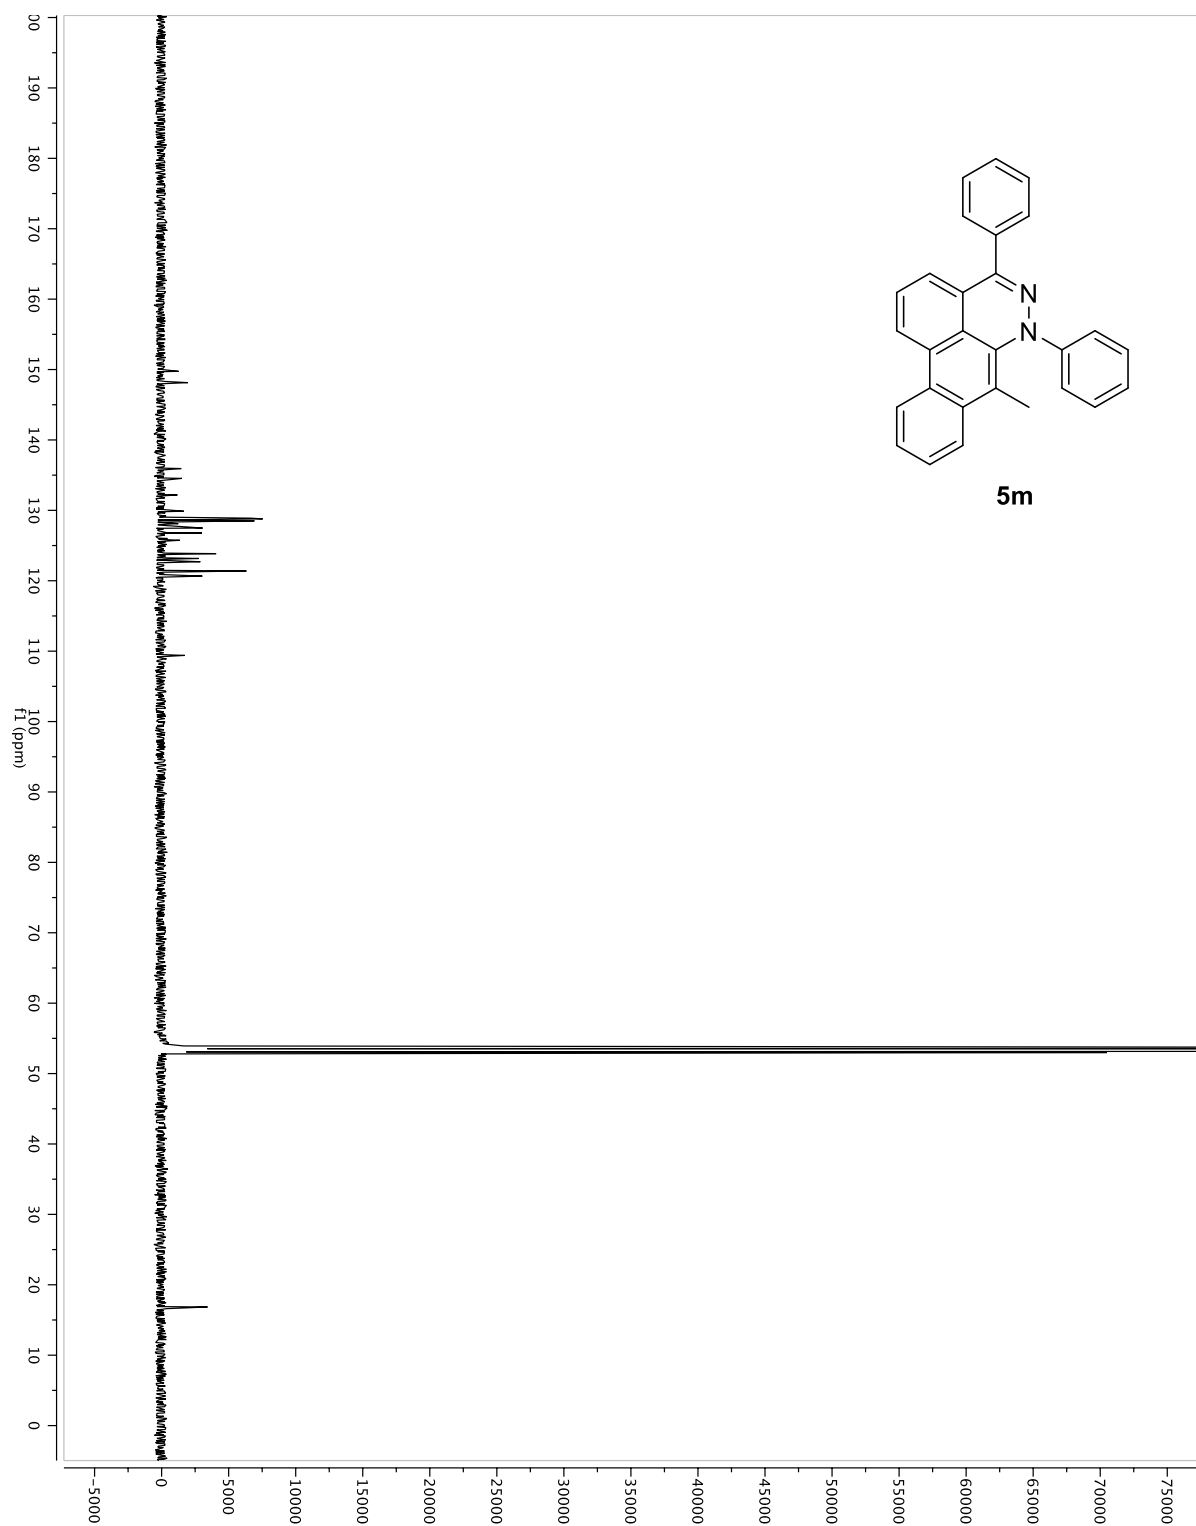

$^1\text{H}$  NMR spectrum of **5n** in  $\text{CD}_2\text{Cl}_2$  (500 MHz).

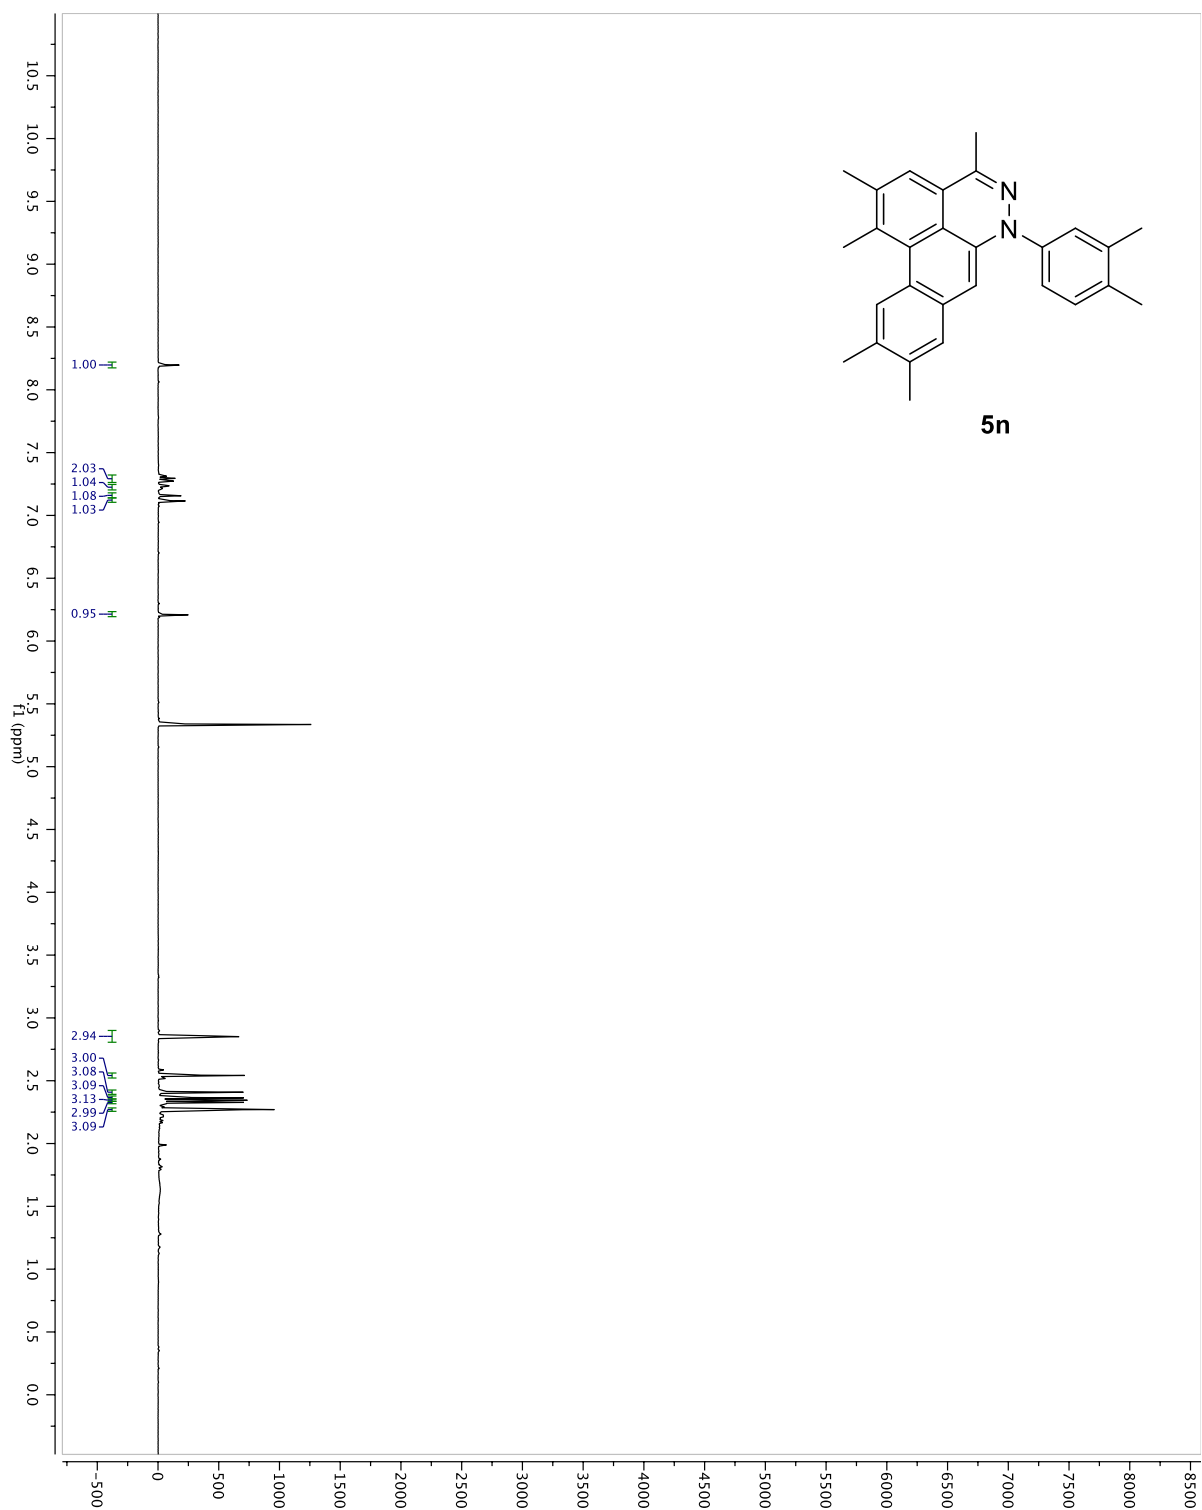

$^{13}\text{C}$  NMR spectrum of **5n** in  $\text{CD}_2\text{Cl}_2$  (125 MHz).

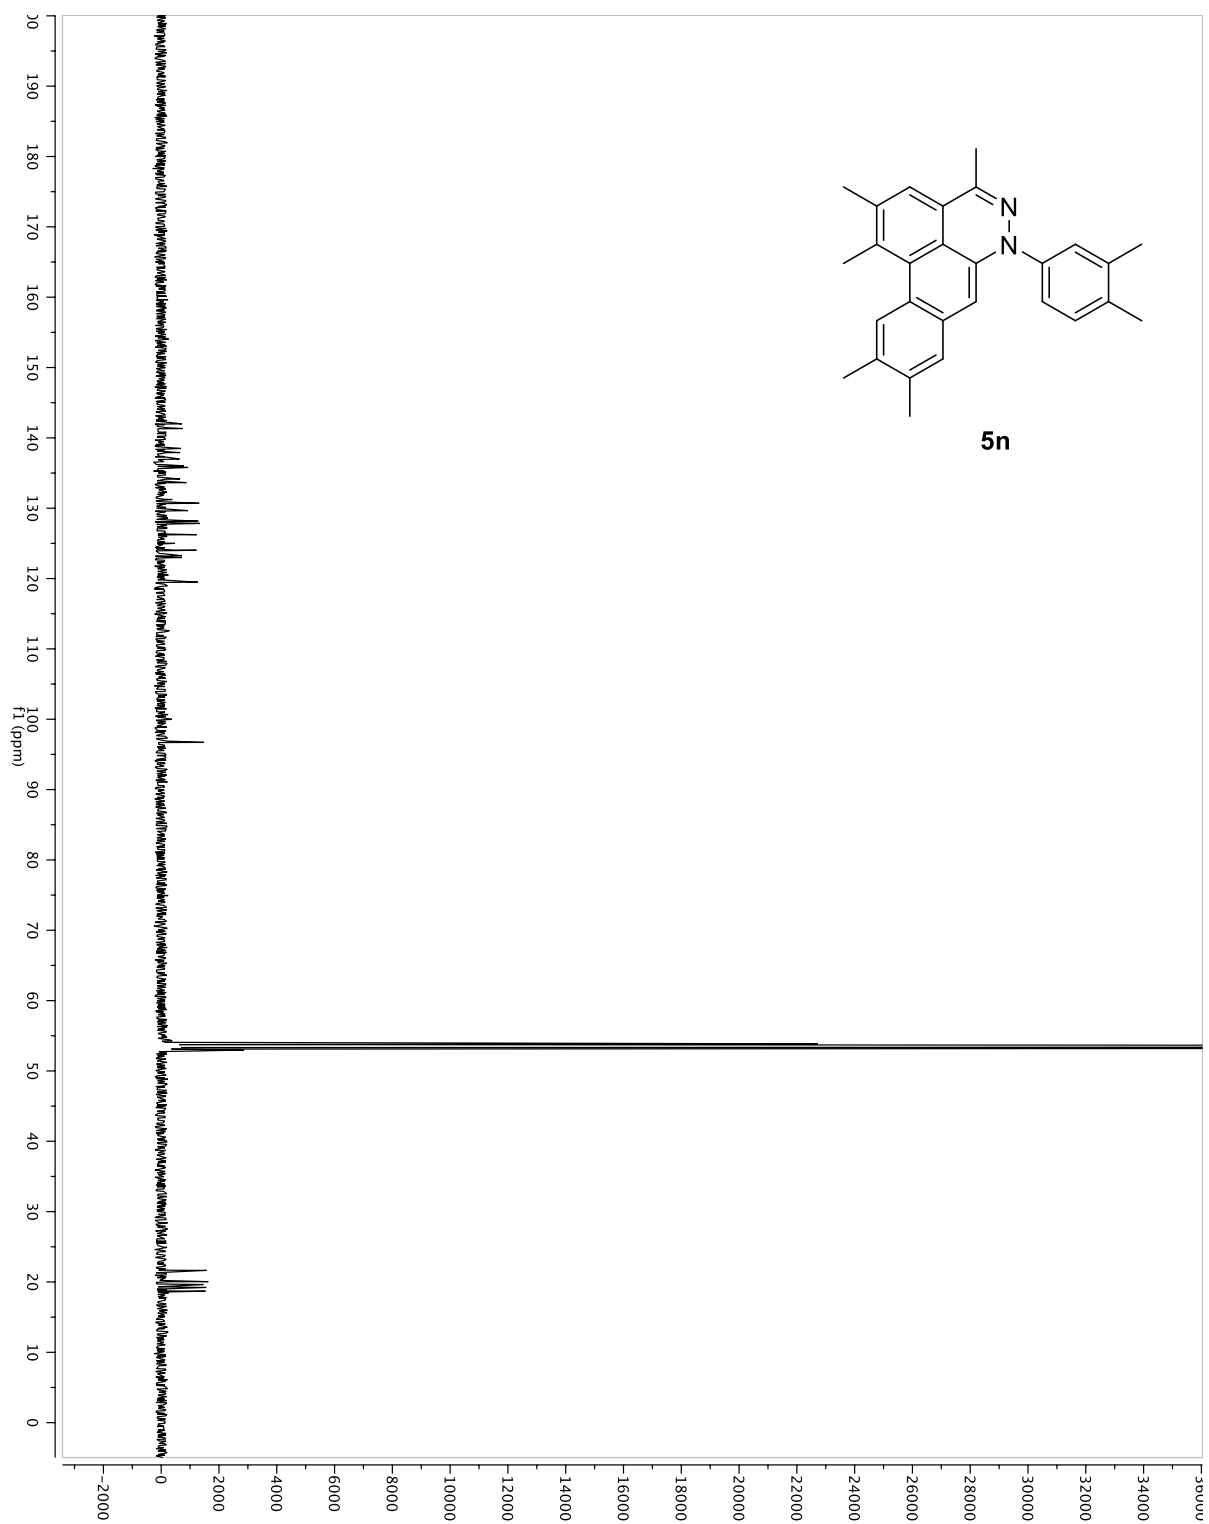

$^1\text{H}$  NMR spectrum of **5o** in  $\text{CD}_2\text{Cl}_2$  (500 MHz).

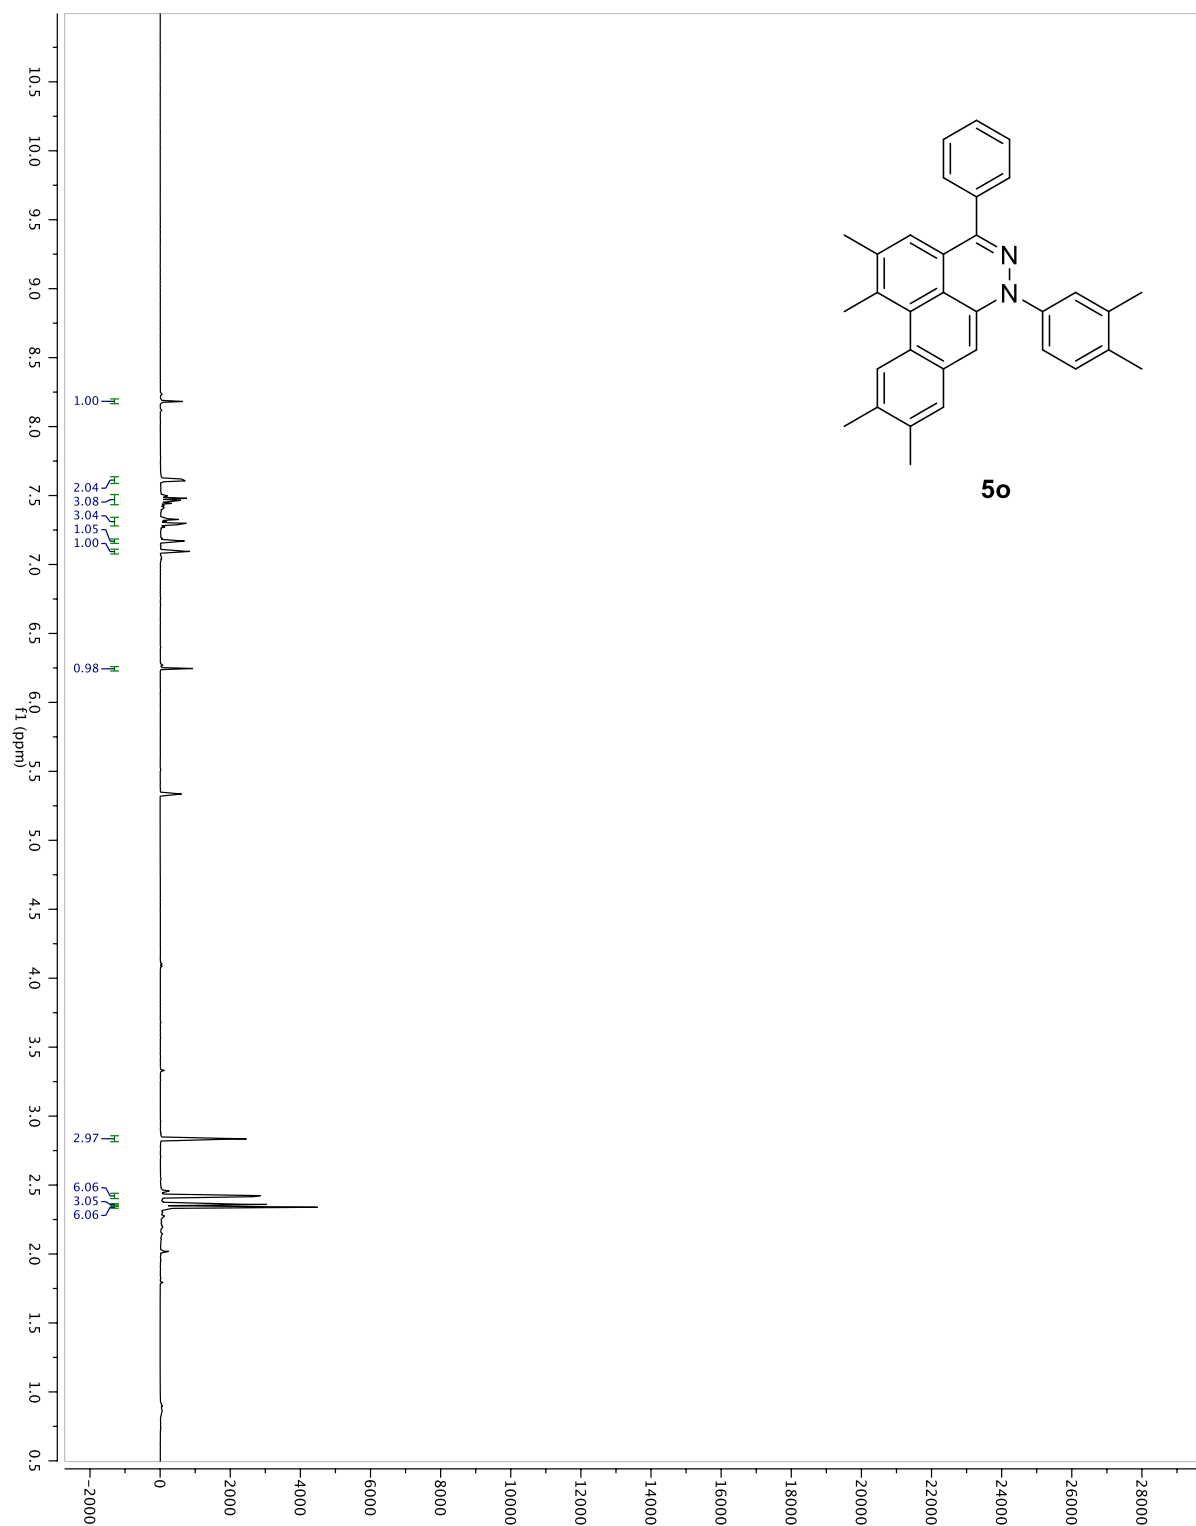

$^{13}\text{C}$  NMR spectrum of **5o** in  $\text{CD}_2\text{Cl}_2$  (125 MHz).

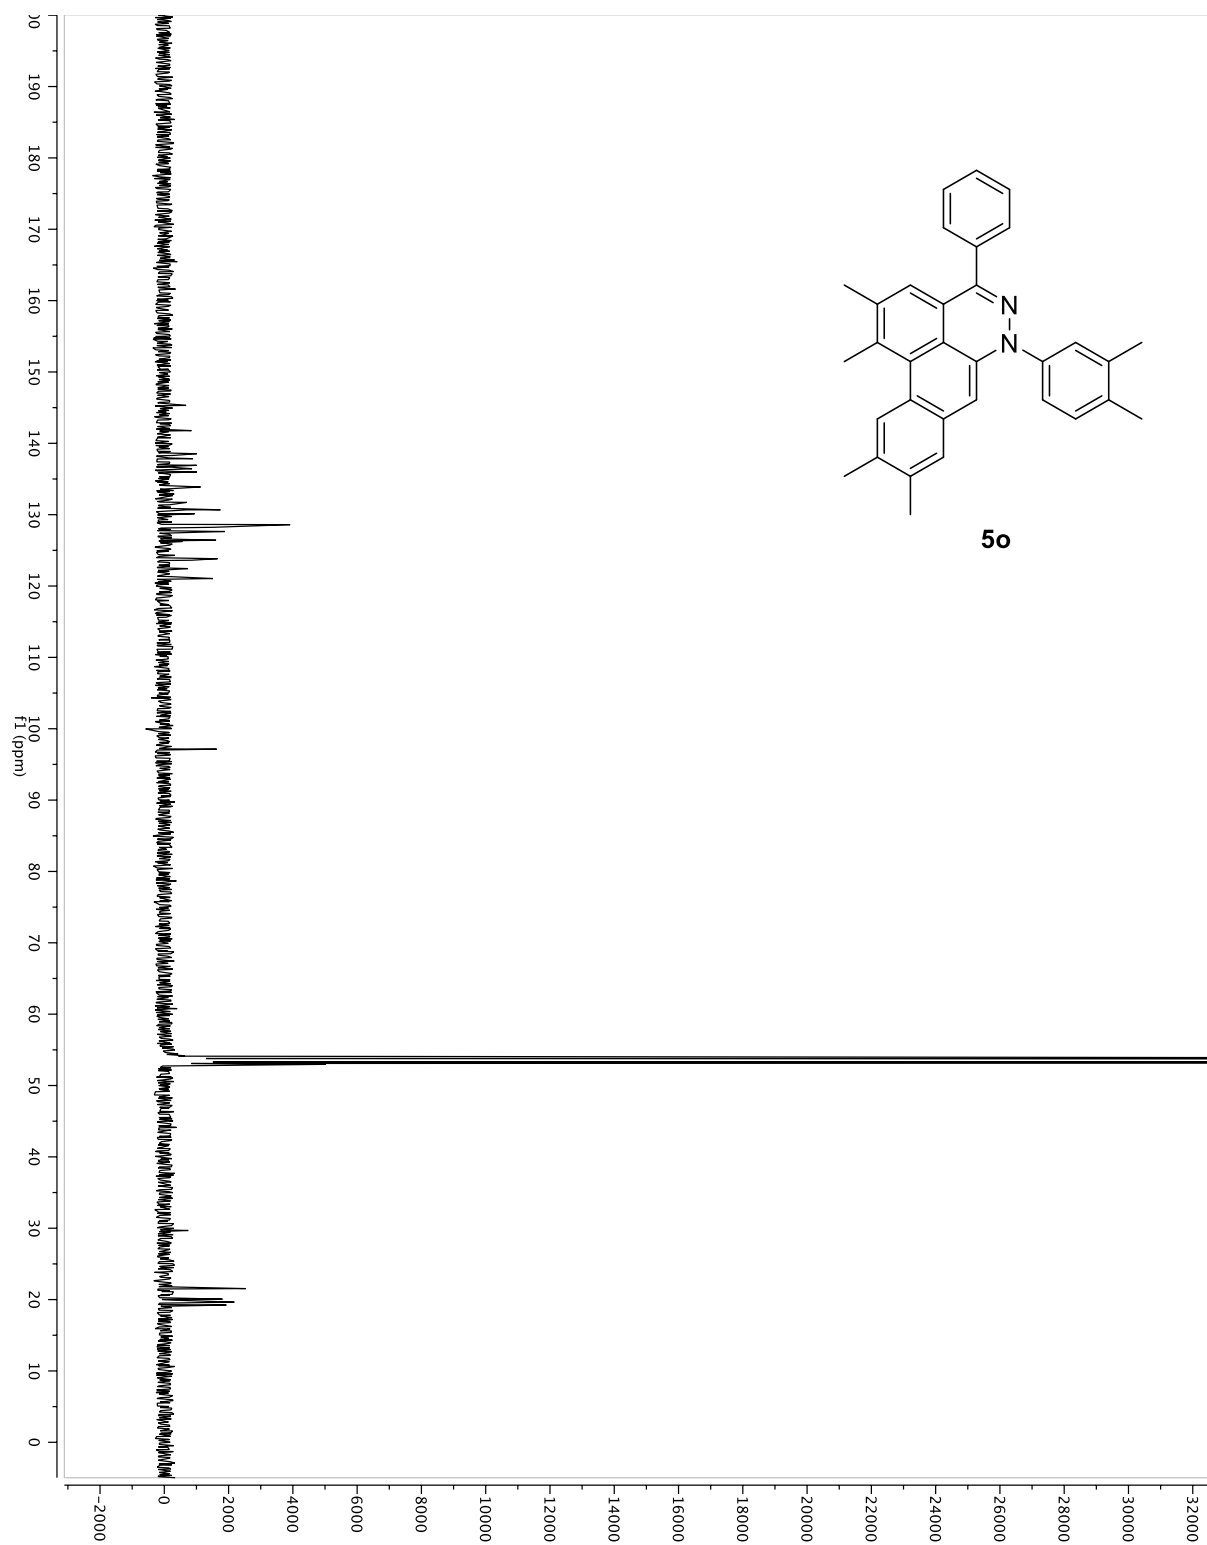

$^1\text{H}$  NMR spectrum of **5p** in  $\text{CD}_2\text{Cl}_2$  (500 MHz).

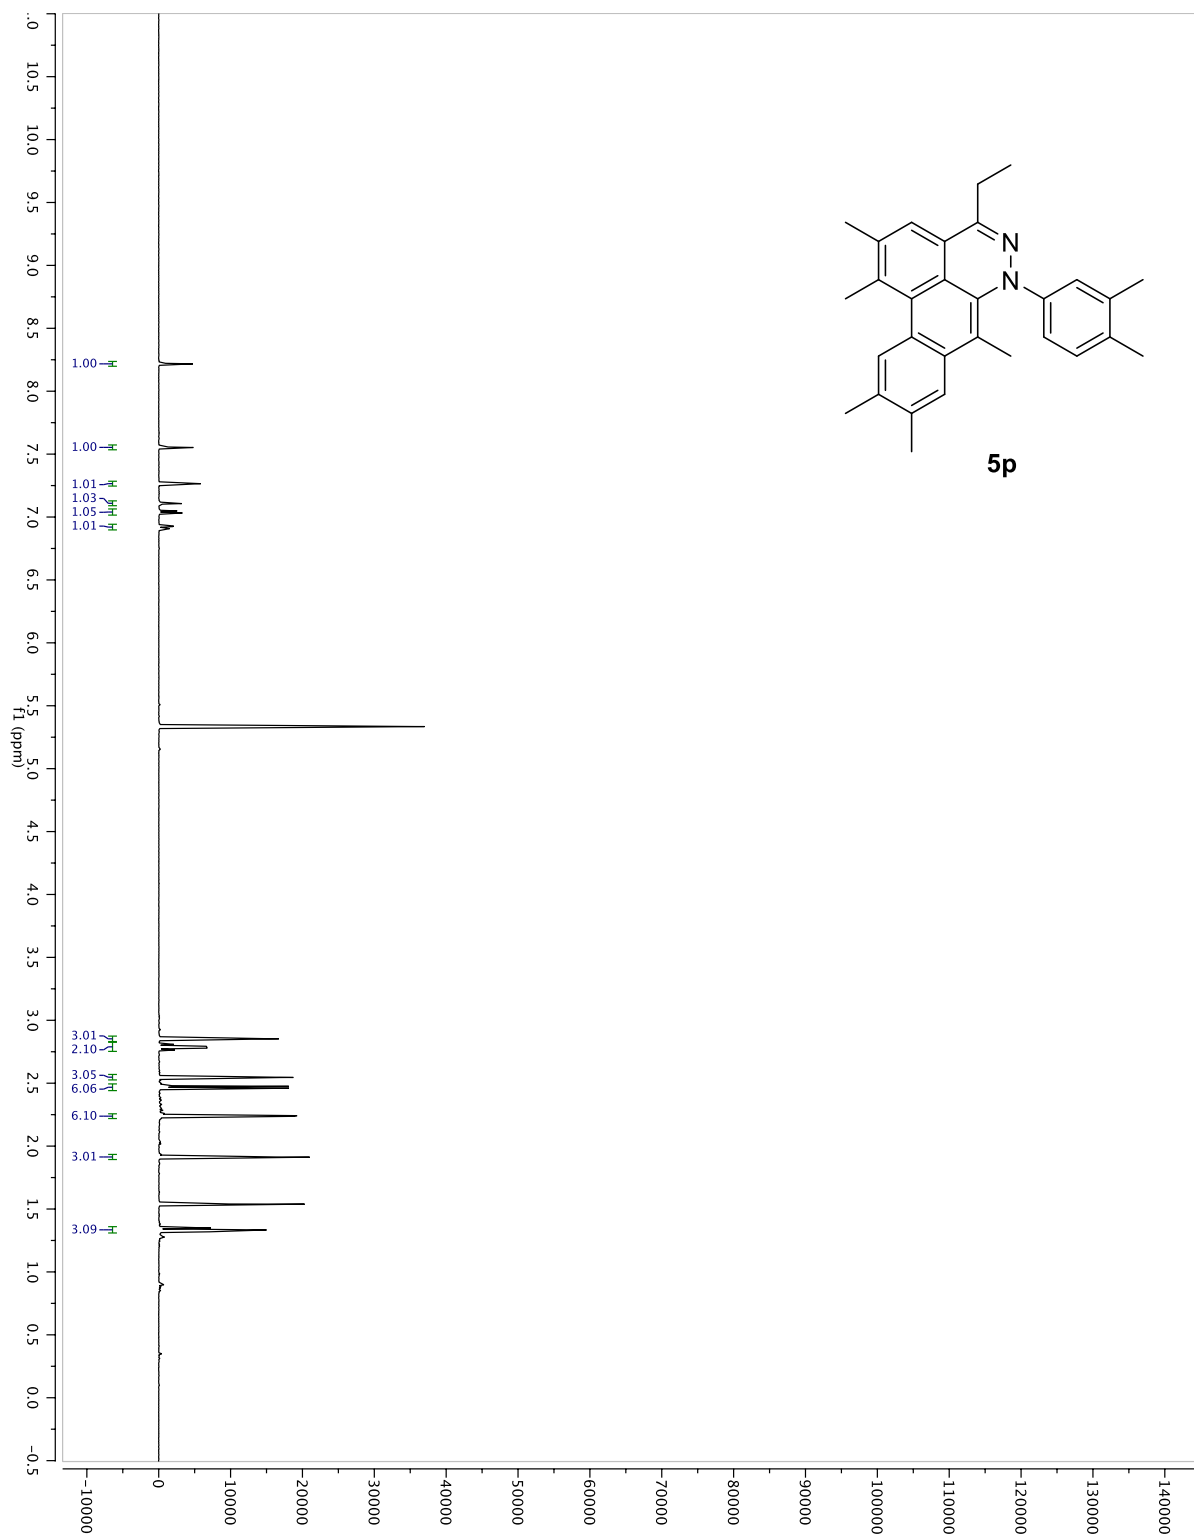



$^{13}\text{C}$  NMR spectrum of **5p** in  $\text{CD}_2\text{Cl}_2$  (125 MHz).

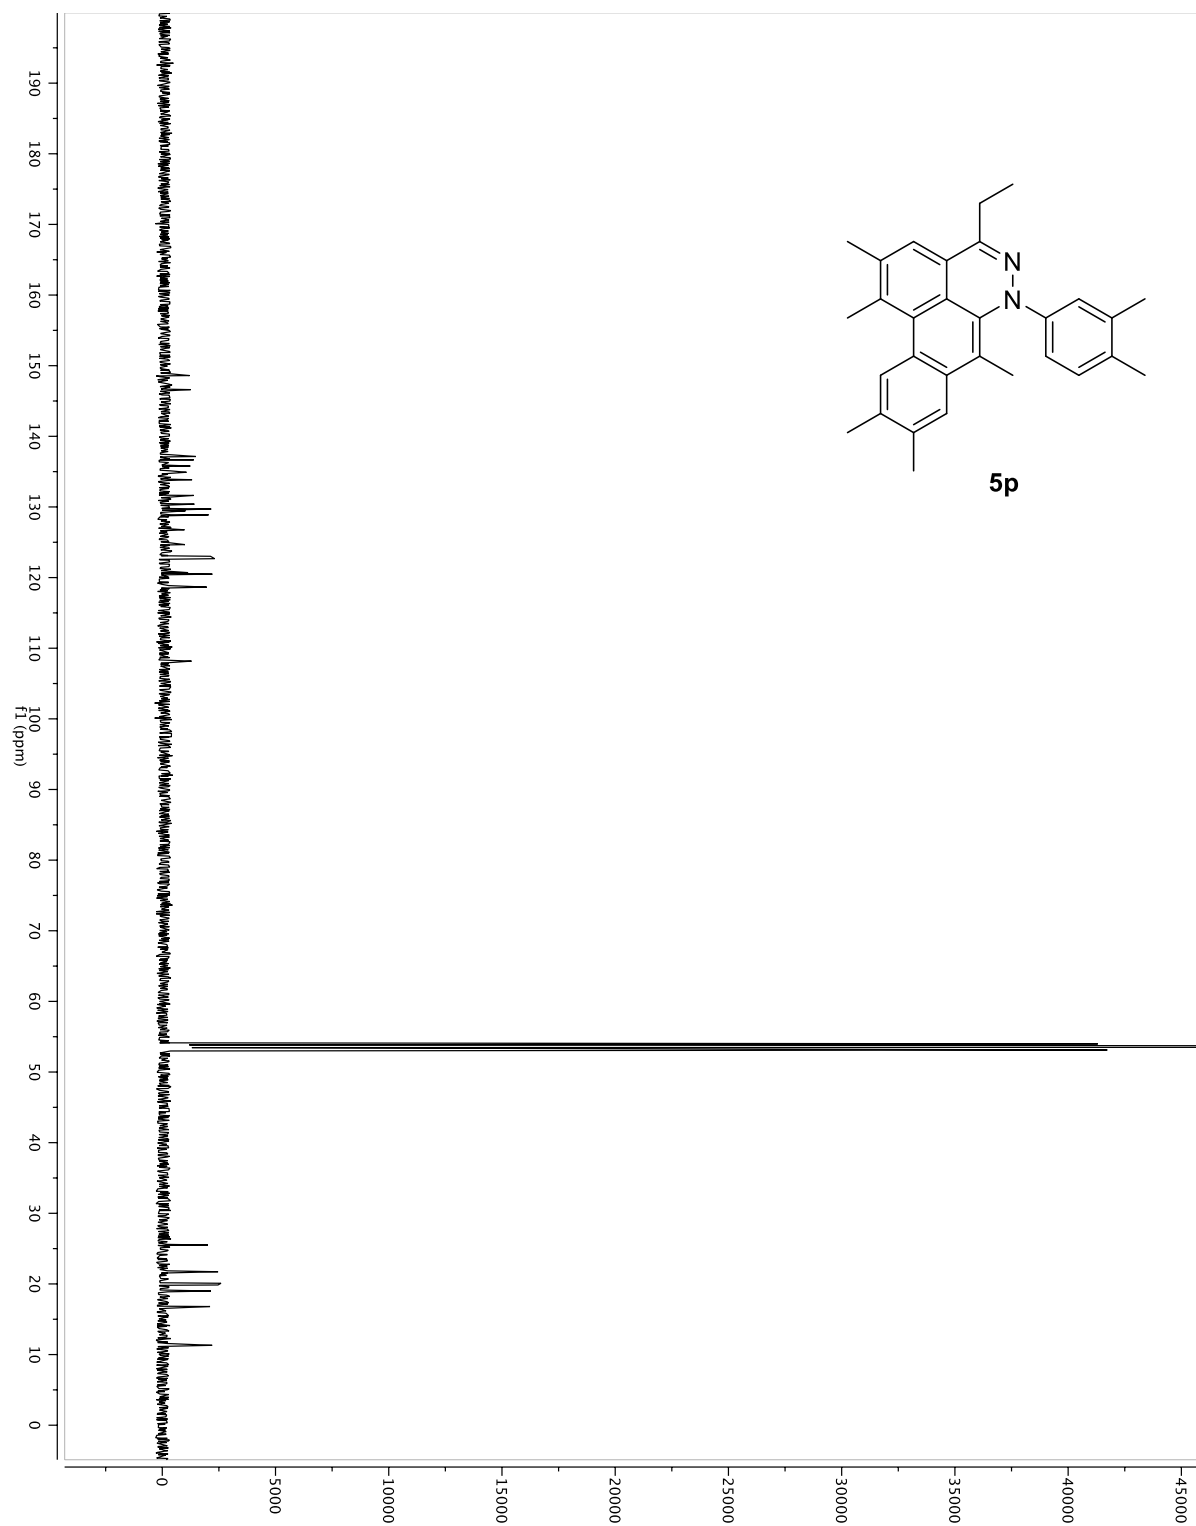

$^1\text{H}$  NMR spectrum of **3m** in  $\text{CD}_2\text{Cl}_2$  (500 MHz).

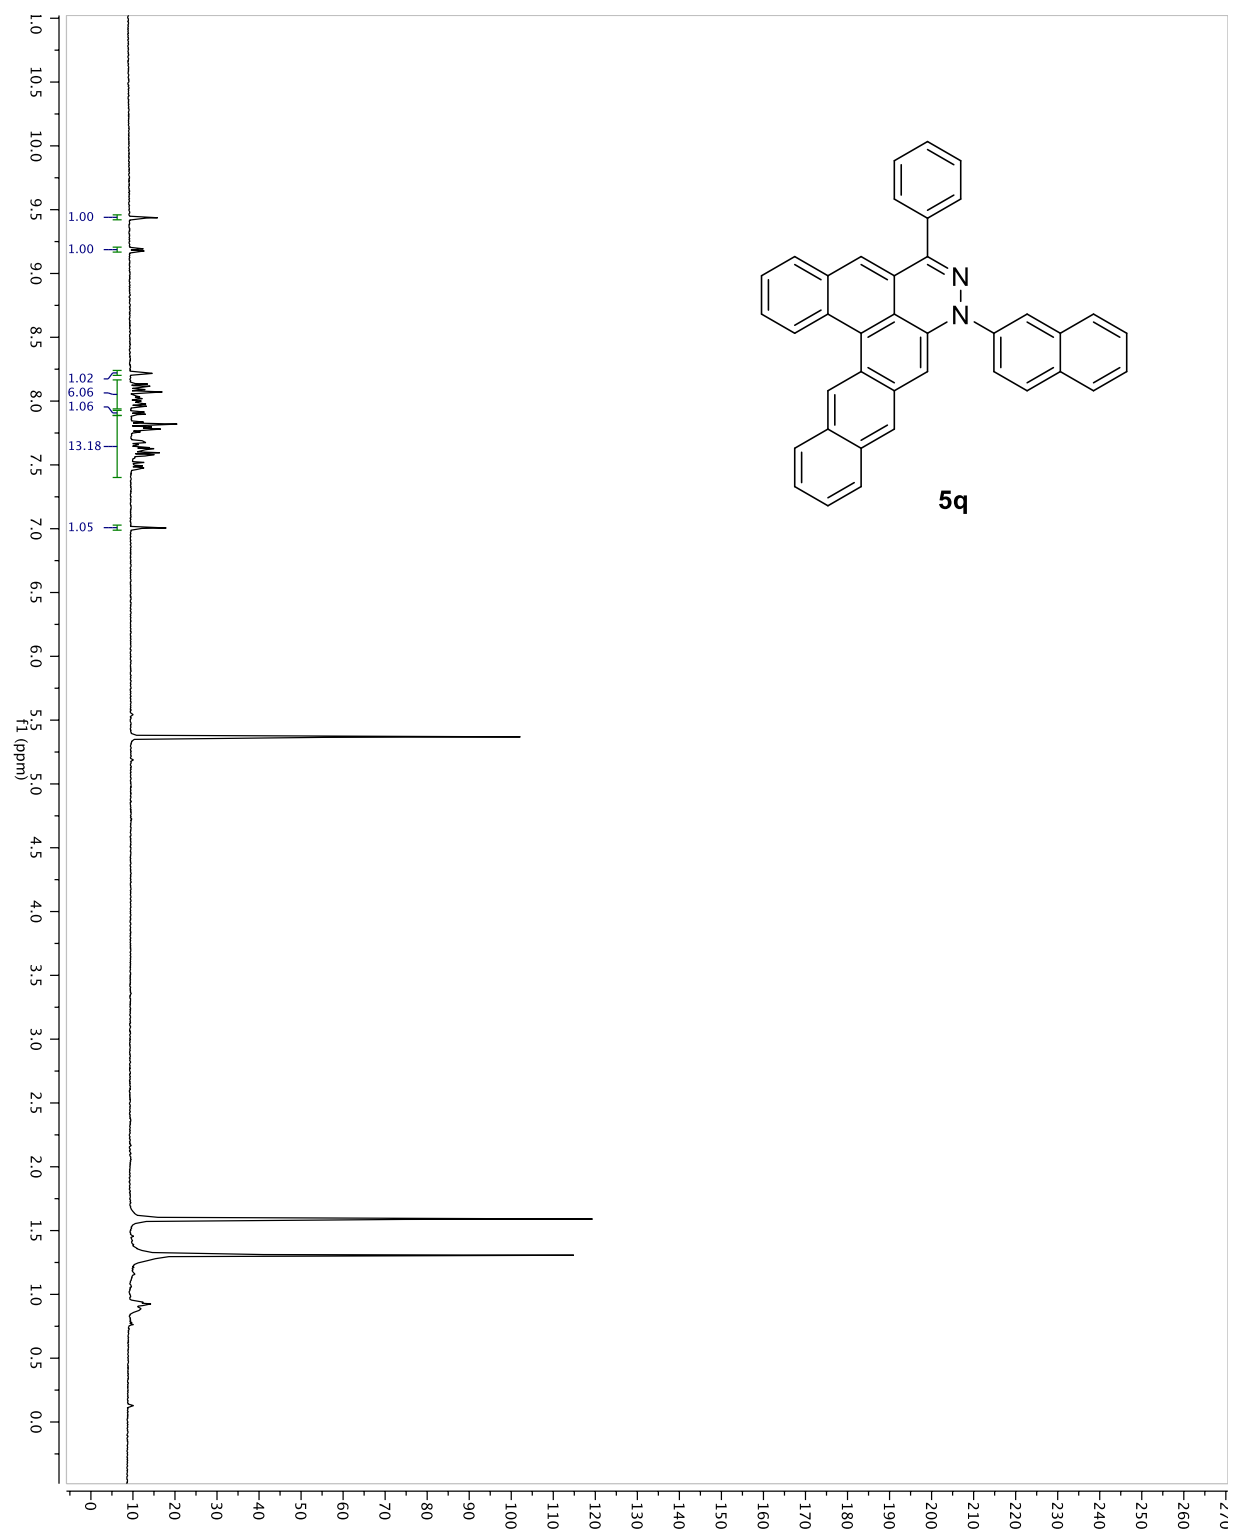

$^{13}\text{C}$  NMR spectrum of **3m** in  $\text{CD}_2\text{Cl}_2$  (125 MHz).

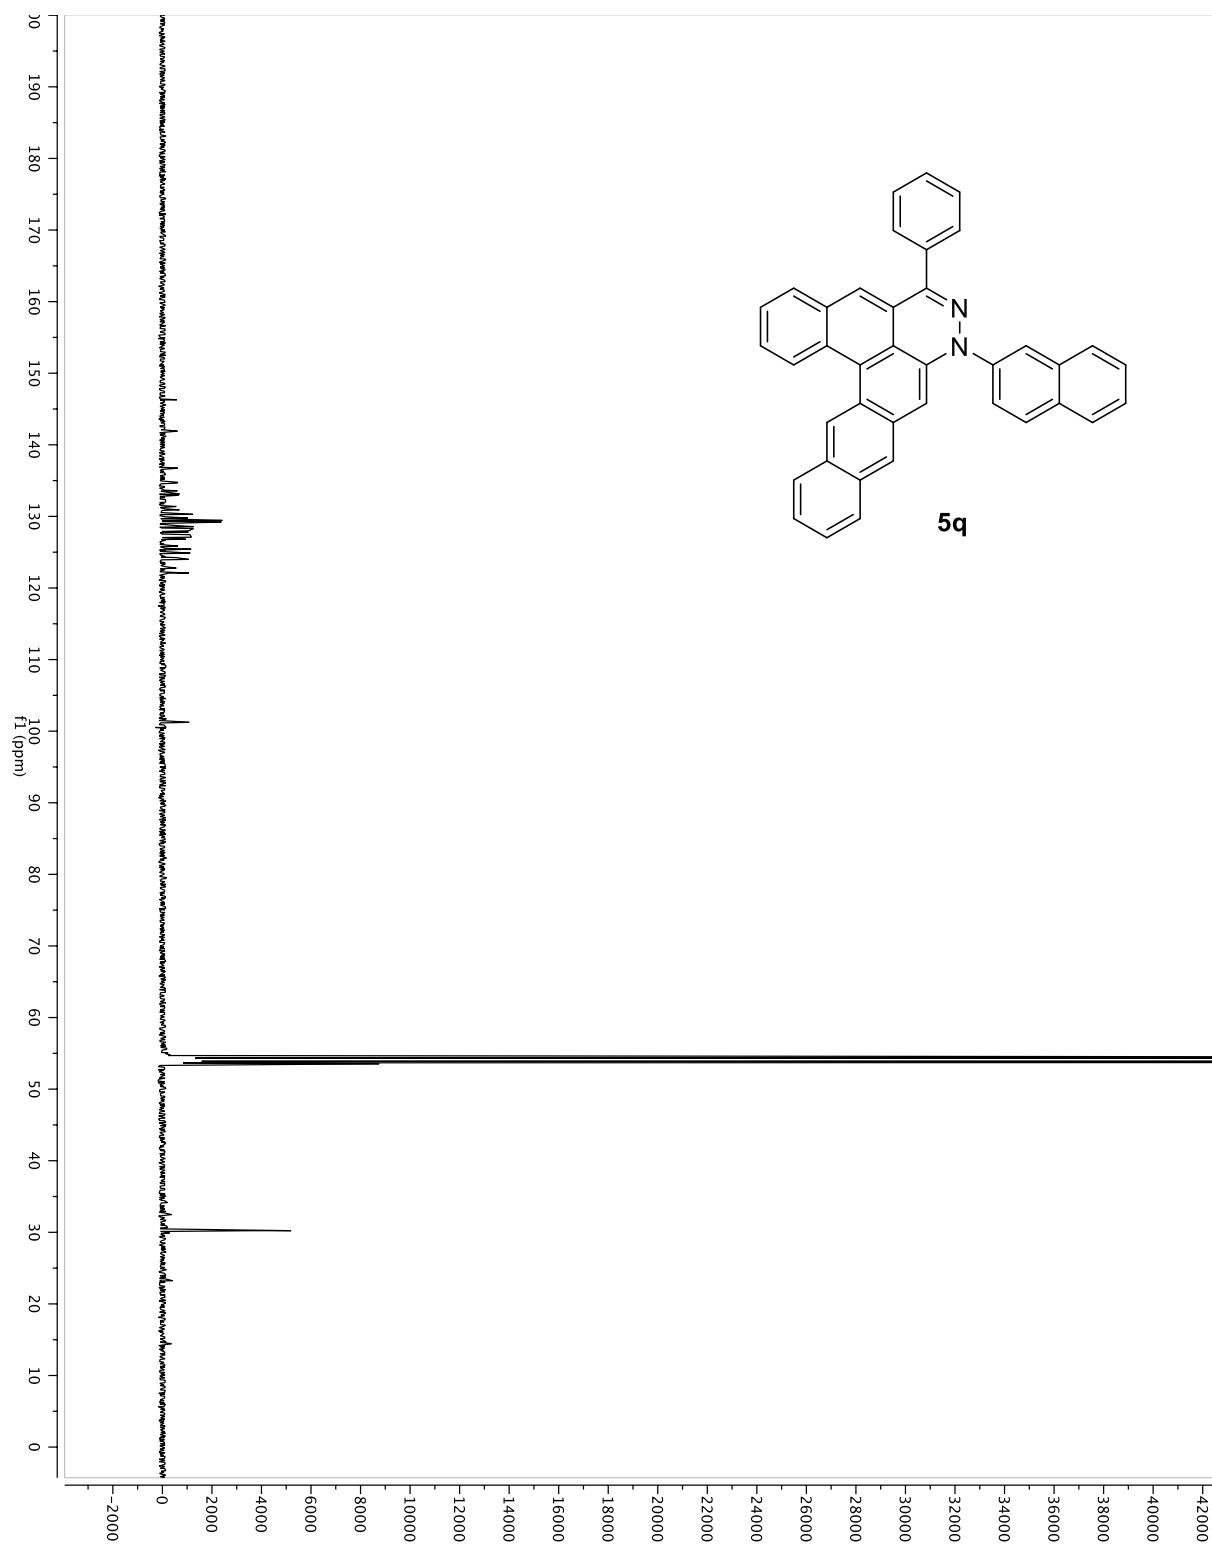

HSQC spectrum of **3m** in CD<sub>2</sub>Cl<sub>2</sub>.

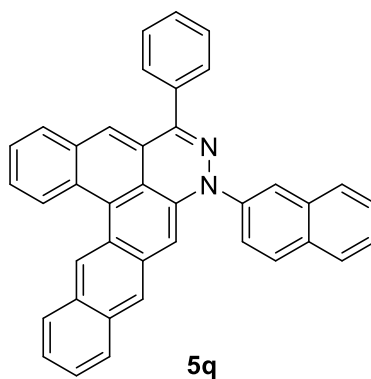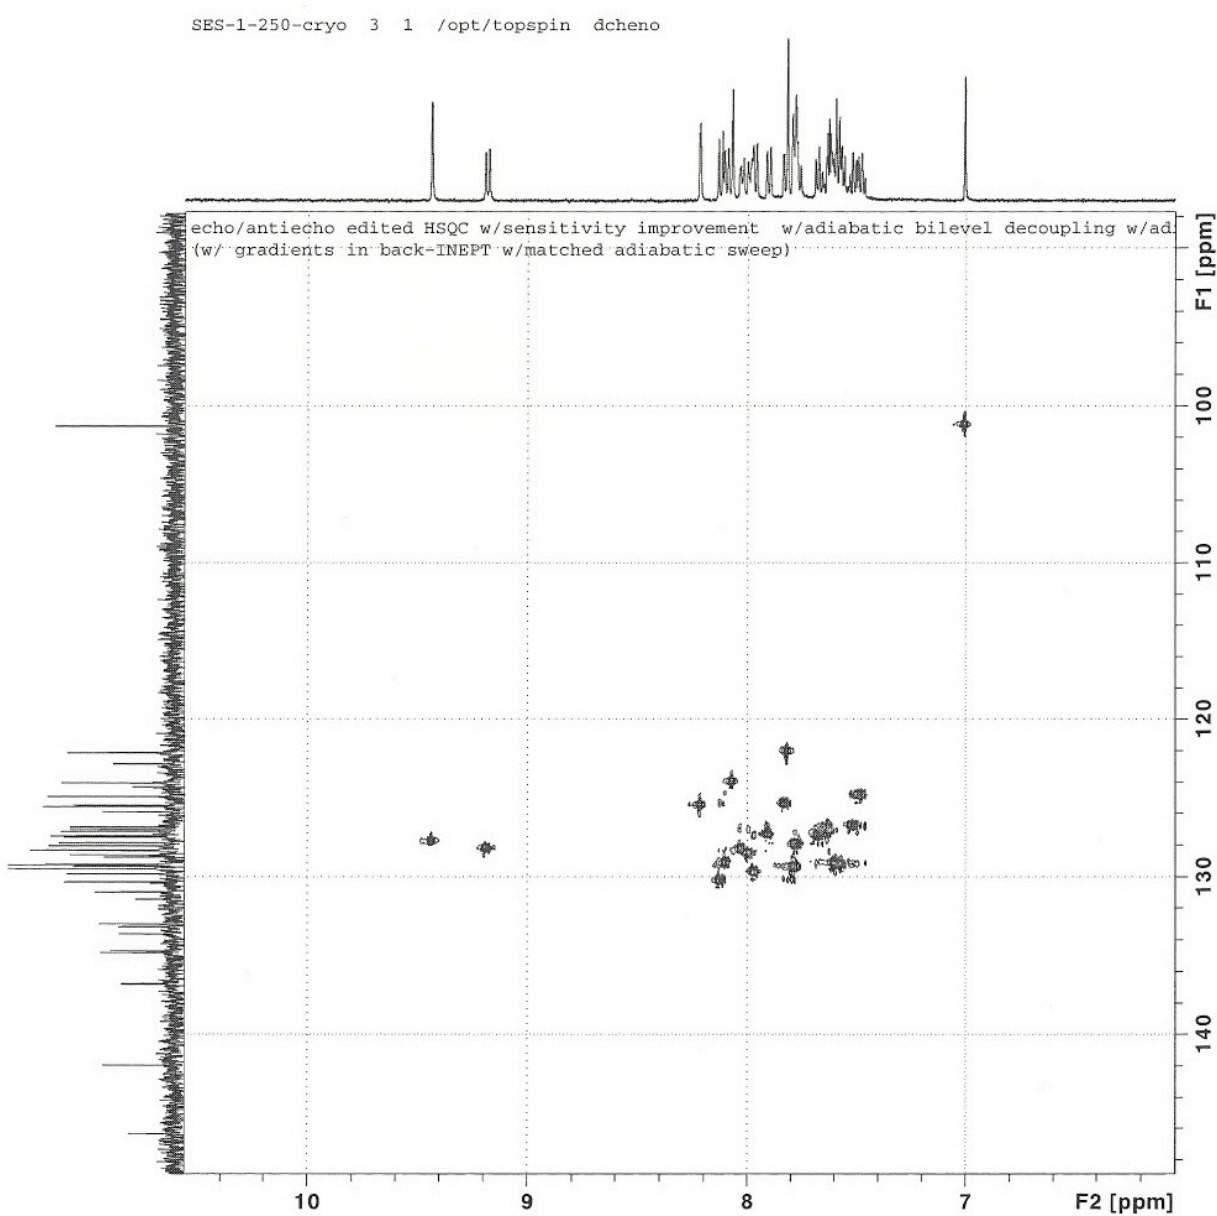

Expanded partial HSQC spectrum of **3m** in CD<sub>2</sub>Cl<sub>2</sub>.

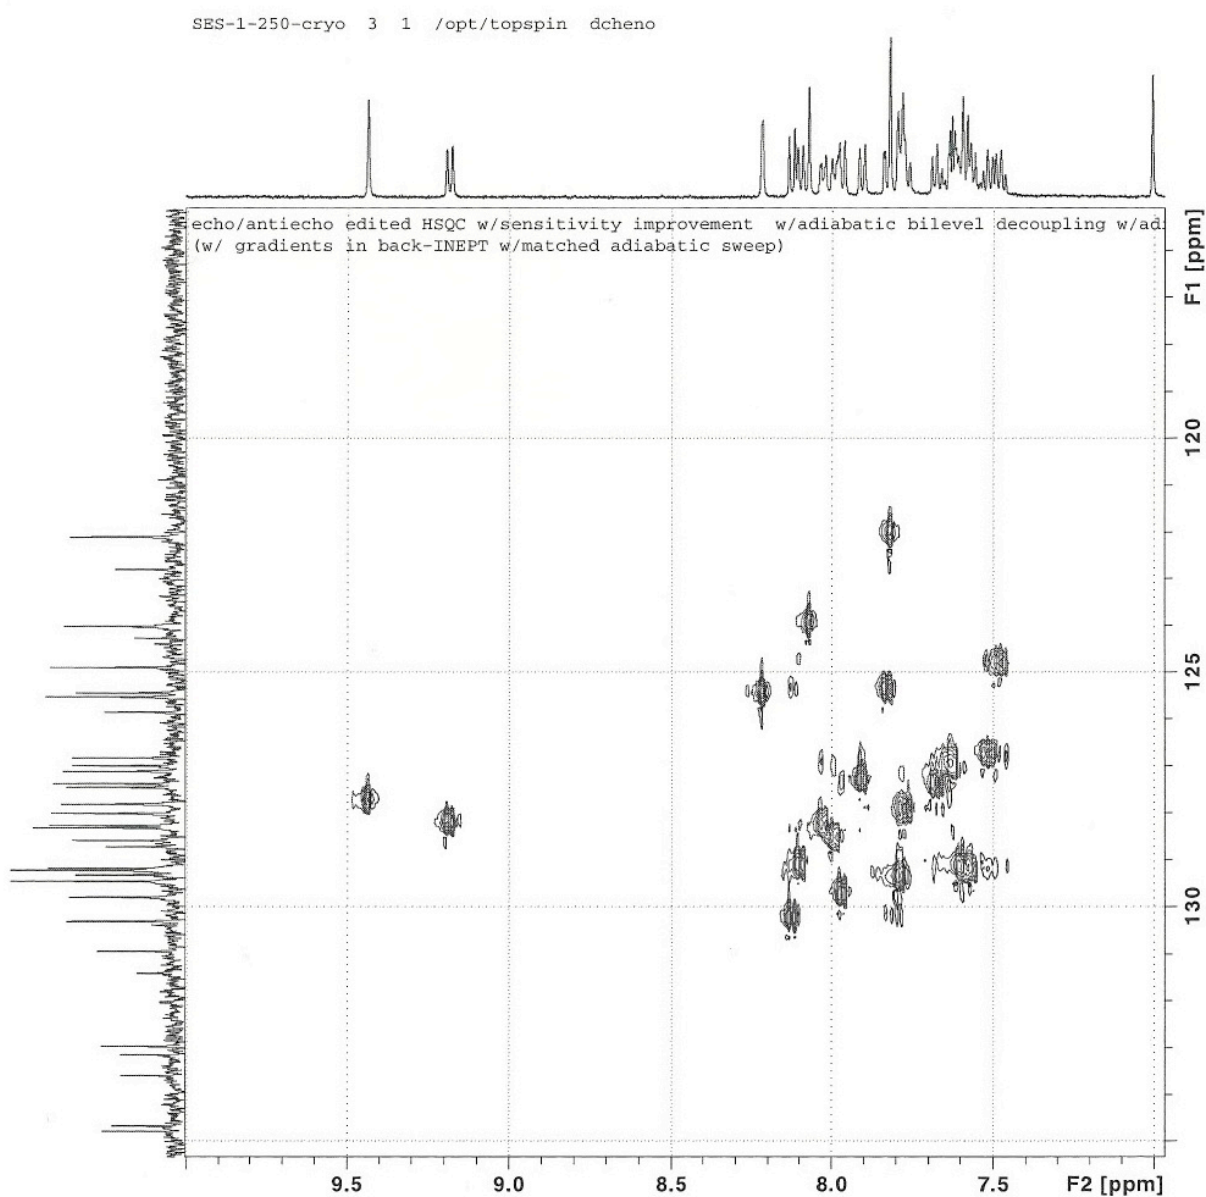

HMBC spectrum of **3m** in CD<sub>2</sub>Cl<sub>2</sub>.



SES-1-250-cryo 4 1 /opt/topspin dcheno

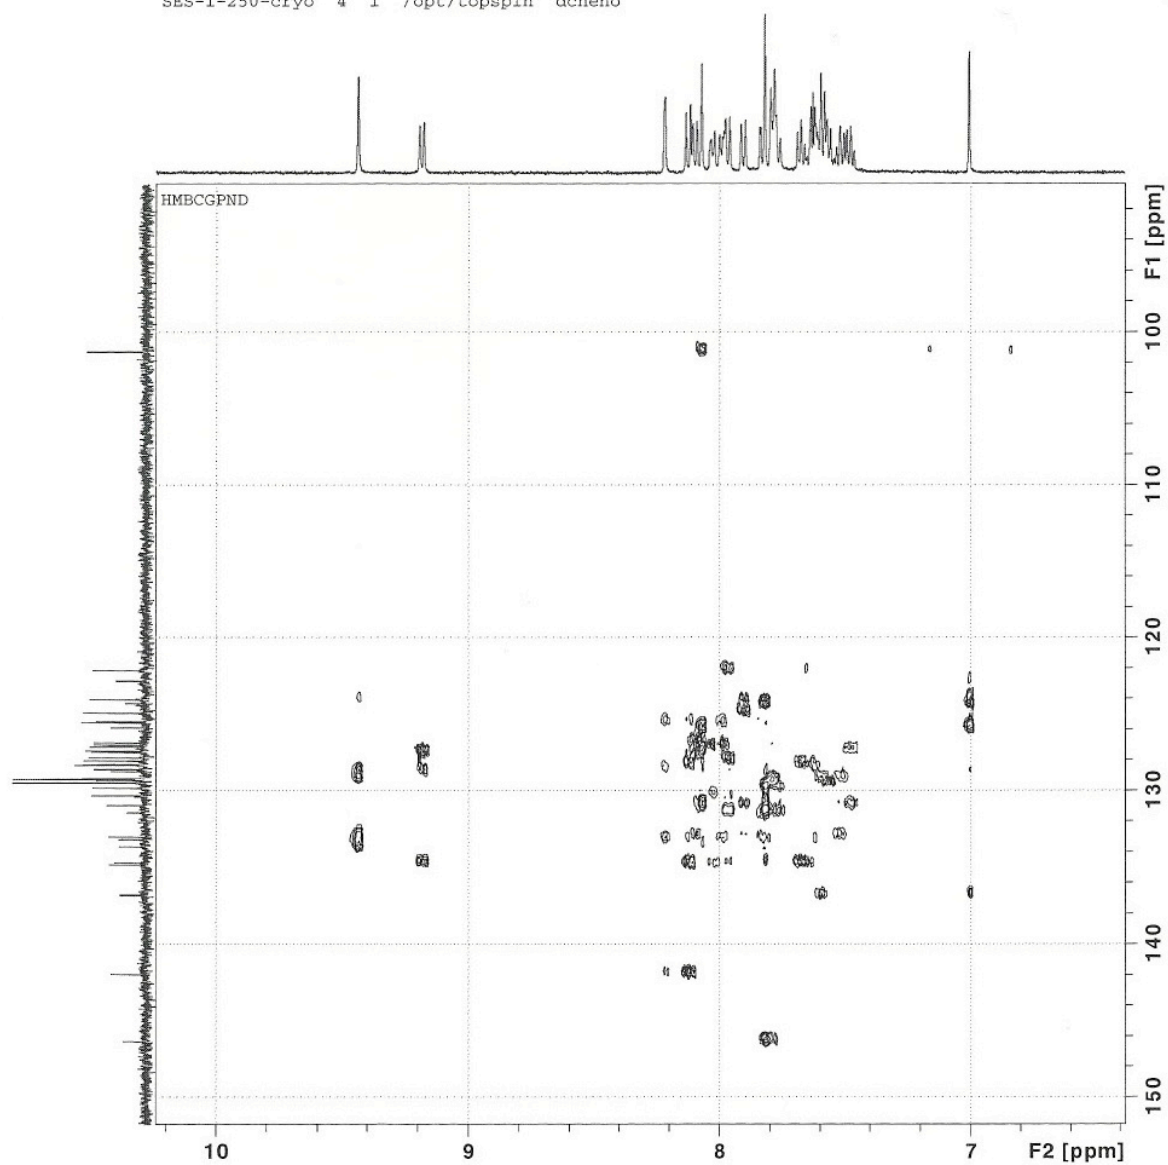

Expanded partial HMBC spectrum of **3m** in CD<sub>2</sub>Cl<sub>2</sub>.



SES-1-250-cryo 4 1 /opt/topspin dcheno

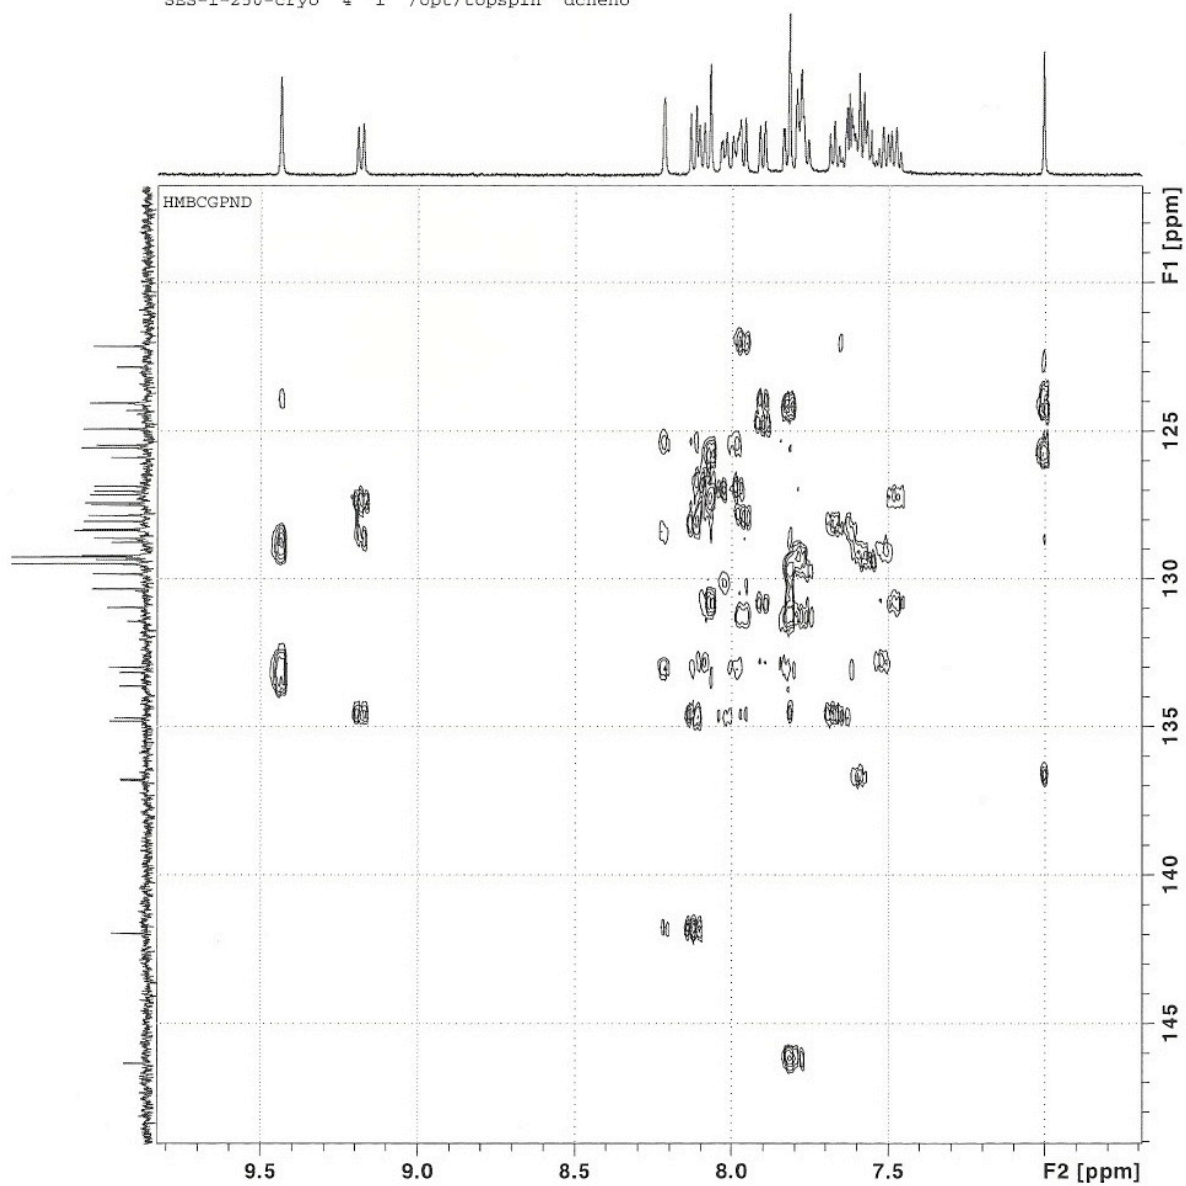

TOCSY spectrum of **3m** in CD<sub>2</sub>Cl<sub>2</sub>.

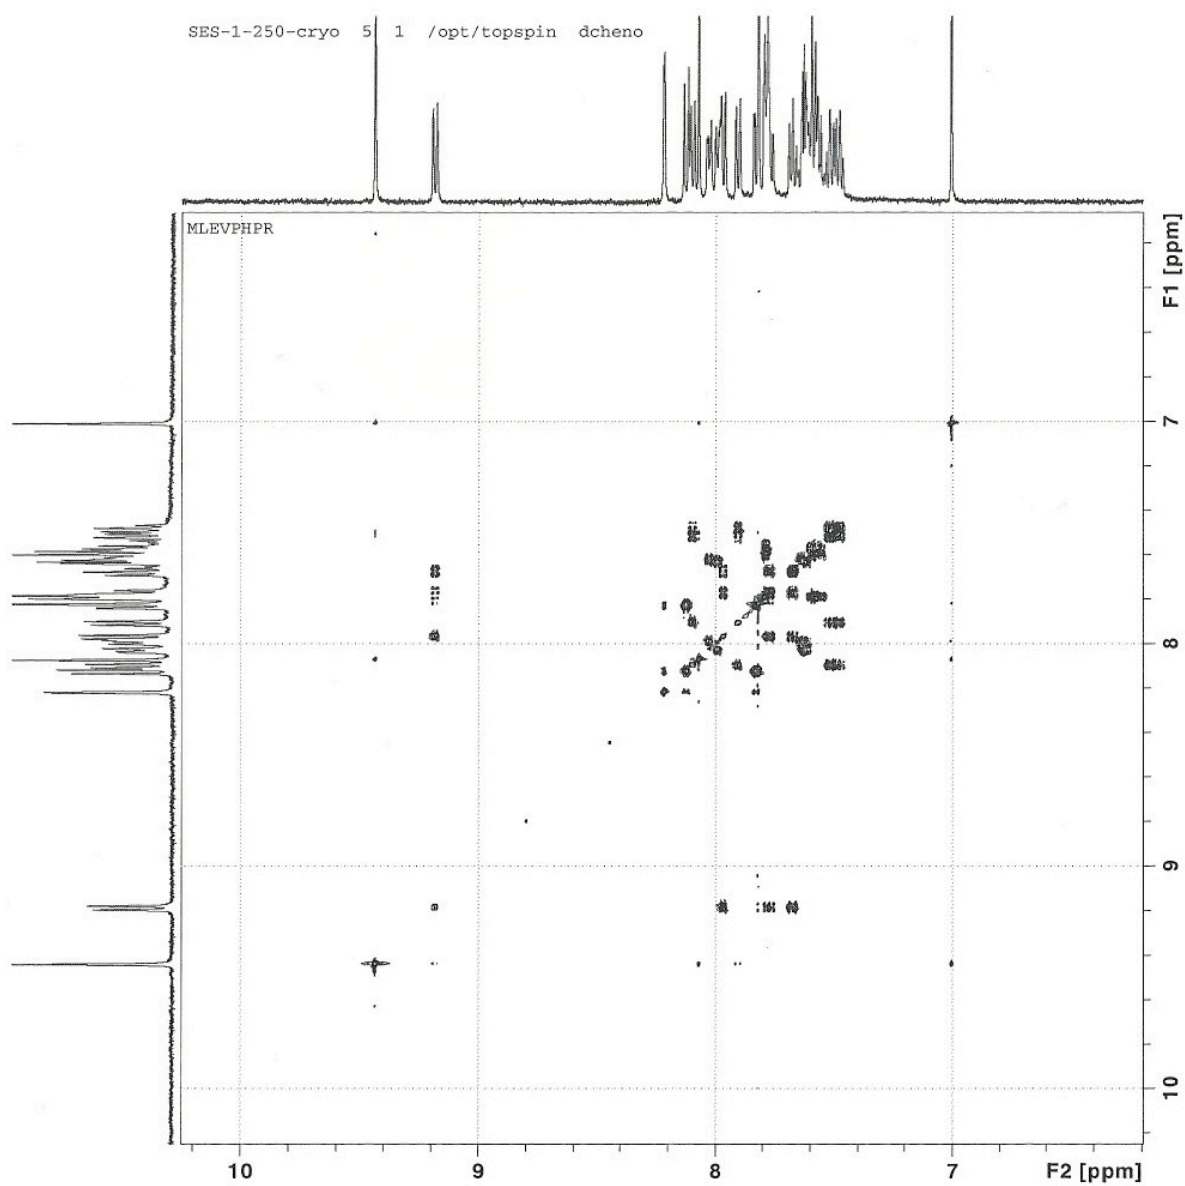



1<sup>st</sup> Expanded partial TOCSY spectrum of **3m** in CD<sub>2</sub>Cl<sub>2</sub>.

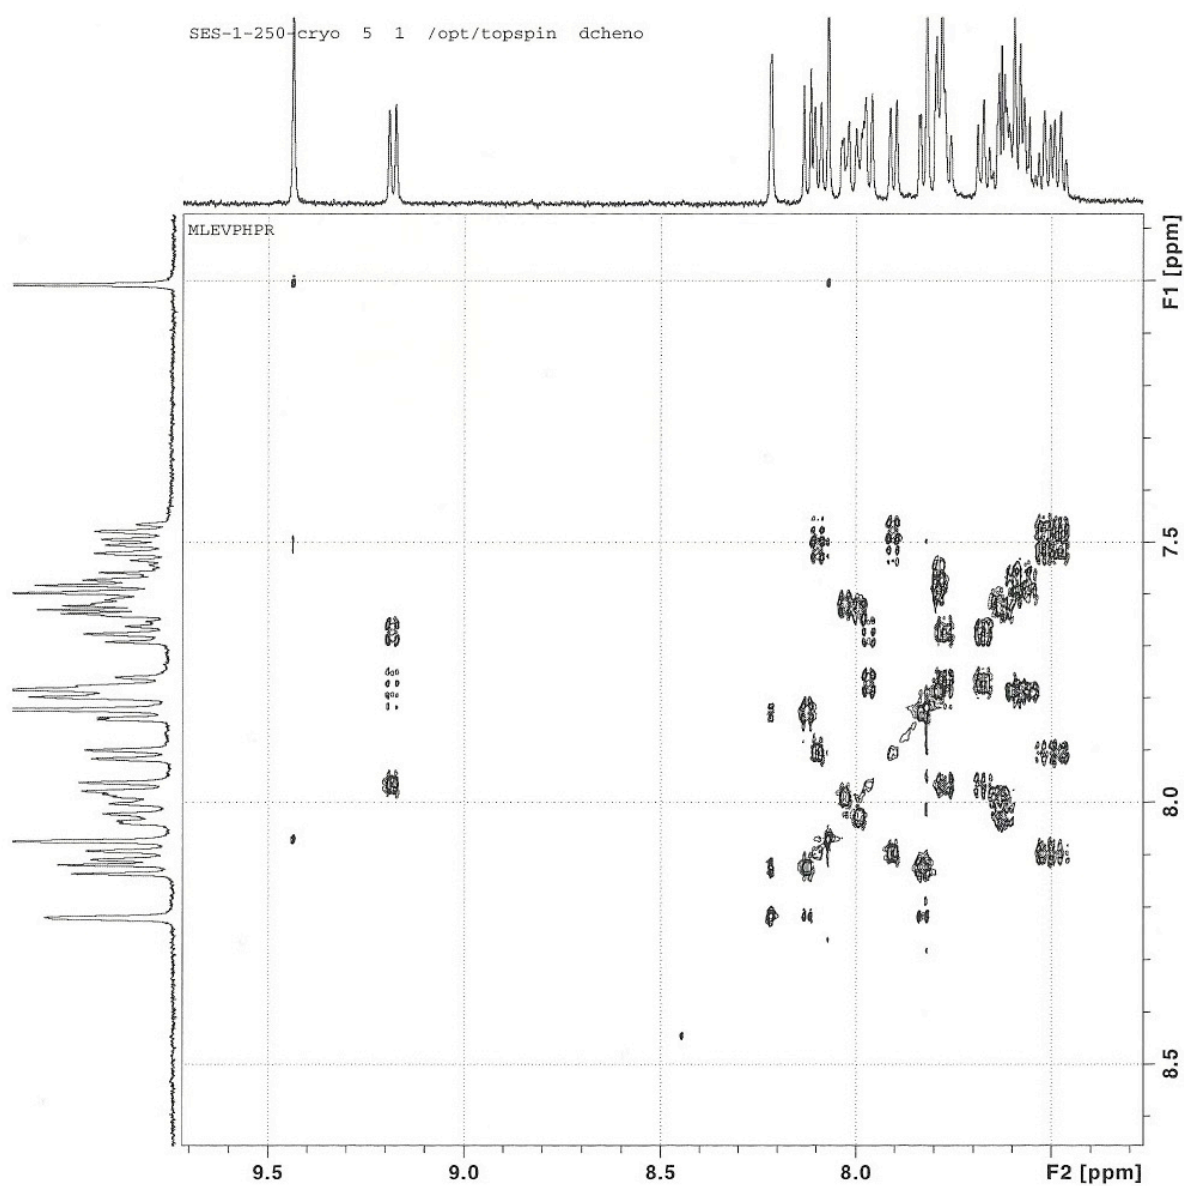

2<sup>nd</sup> Expanded partial TOCSY spectrum of **3m** in CD<sub>2</sub>Cl<sub>2</sub>.

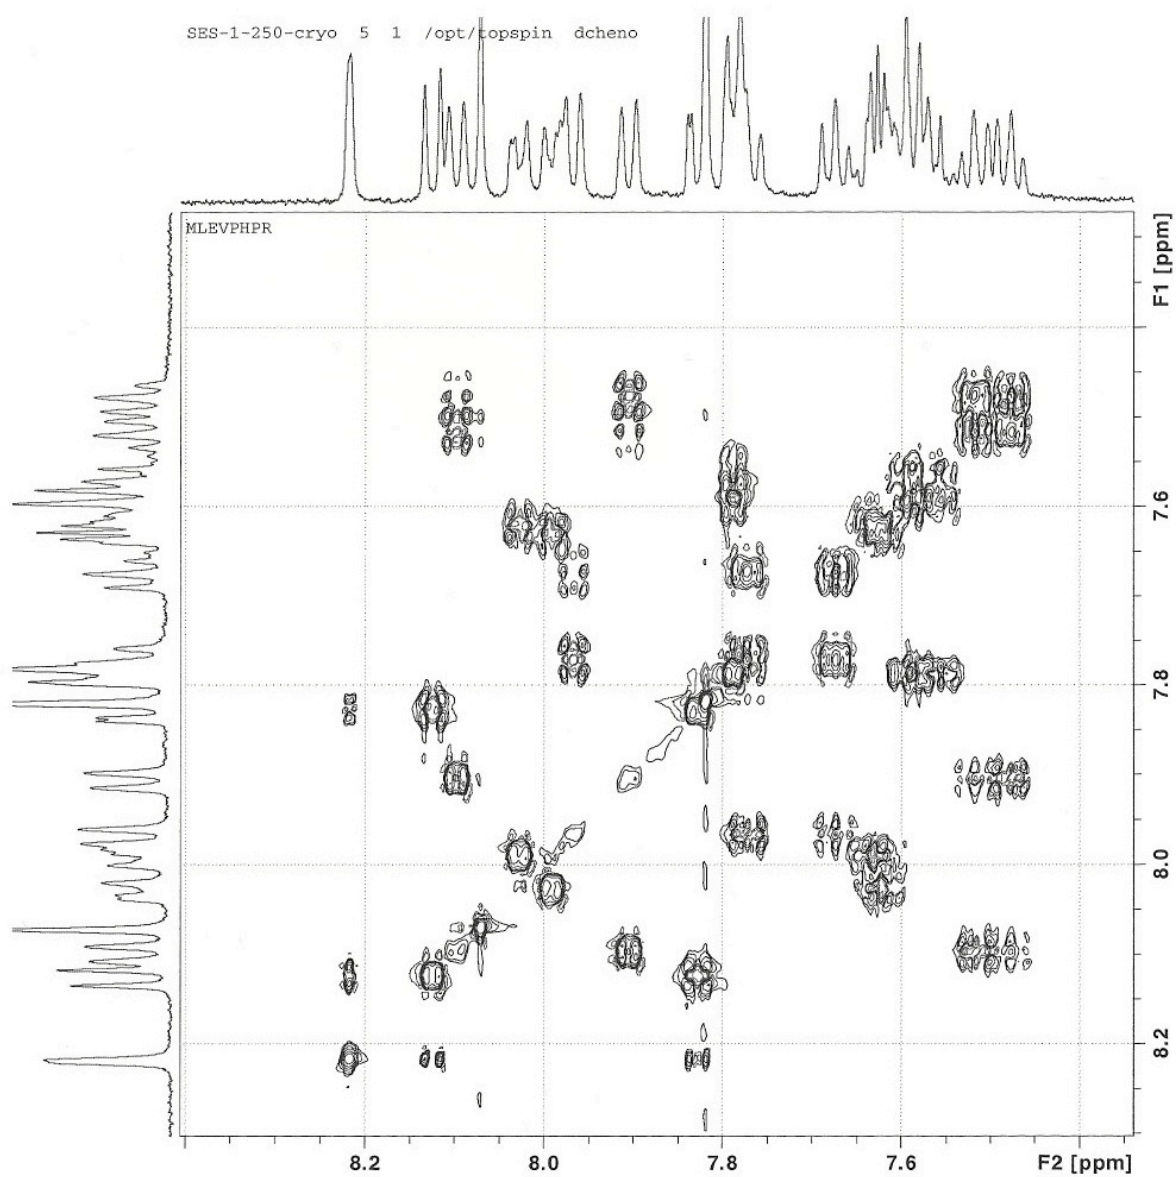

COSY spectrum of **3m** in CD<sub>2</sub>Cl<sub>2</sub>.

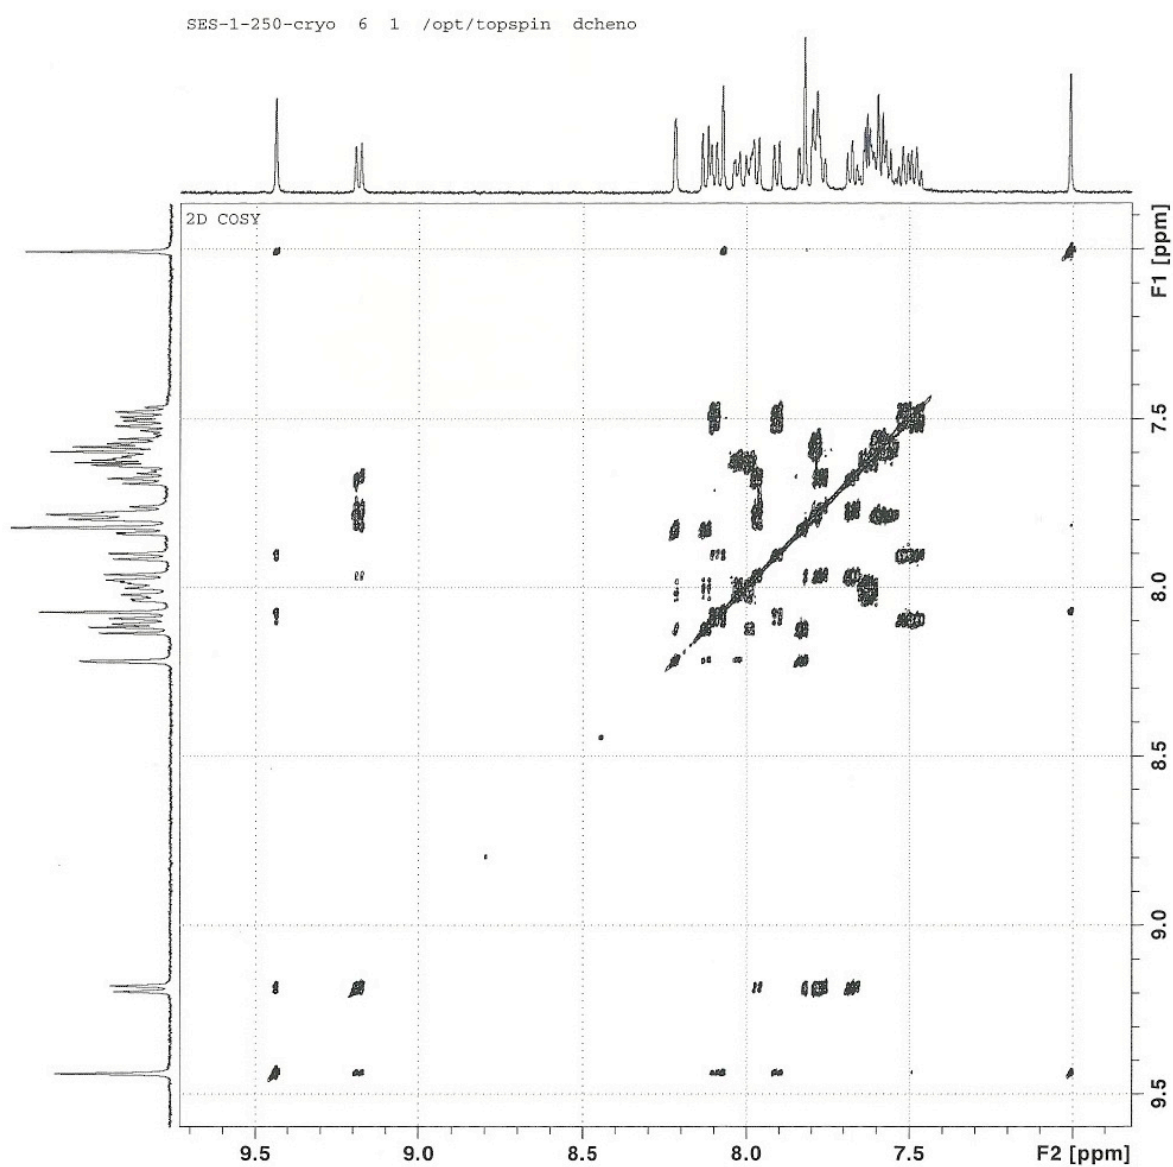

$^1\text{H}$  NMR spectrum of **6** in  $\text{CDCl}_3$  (500 MHz).

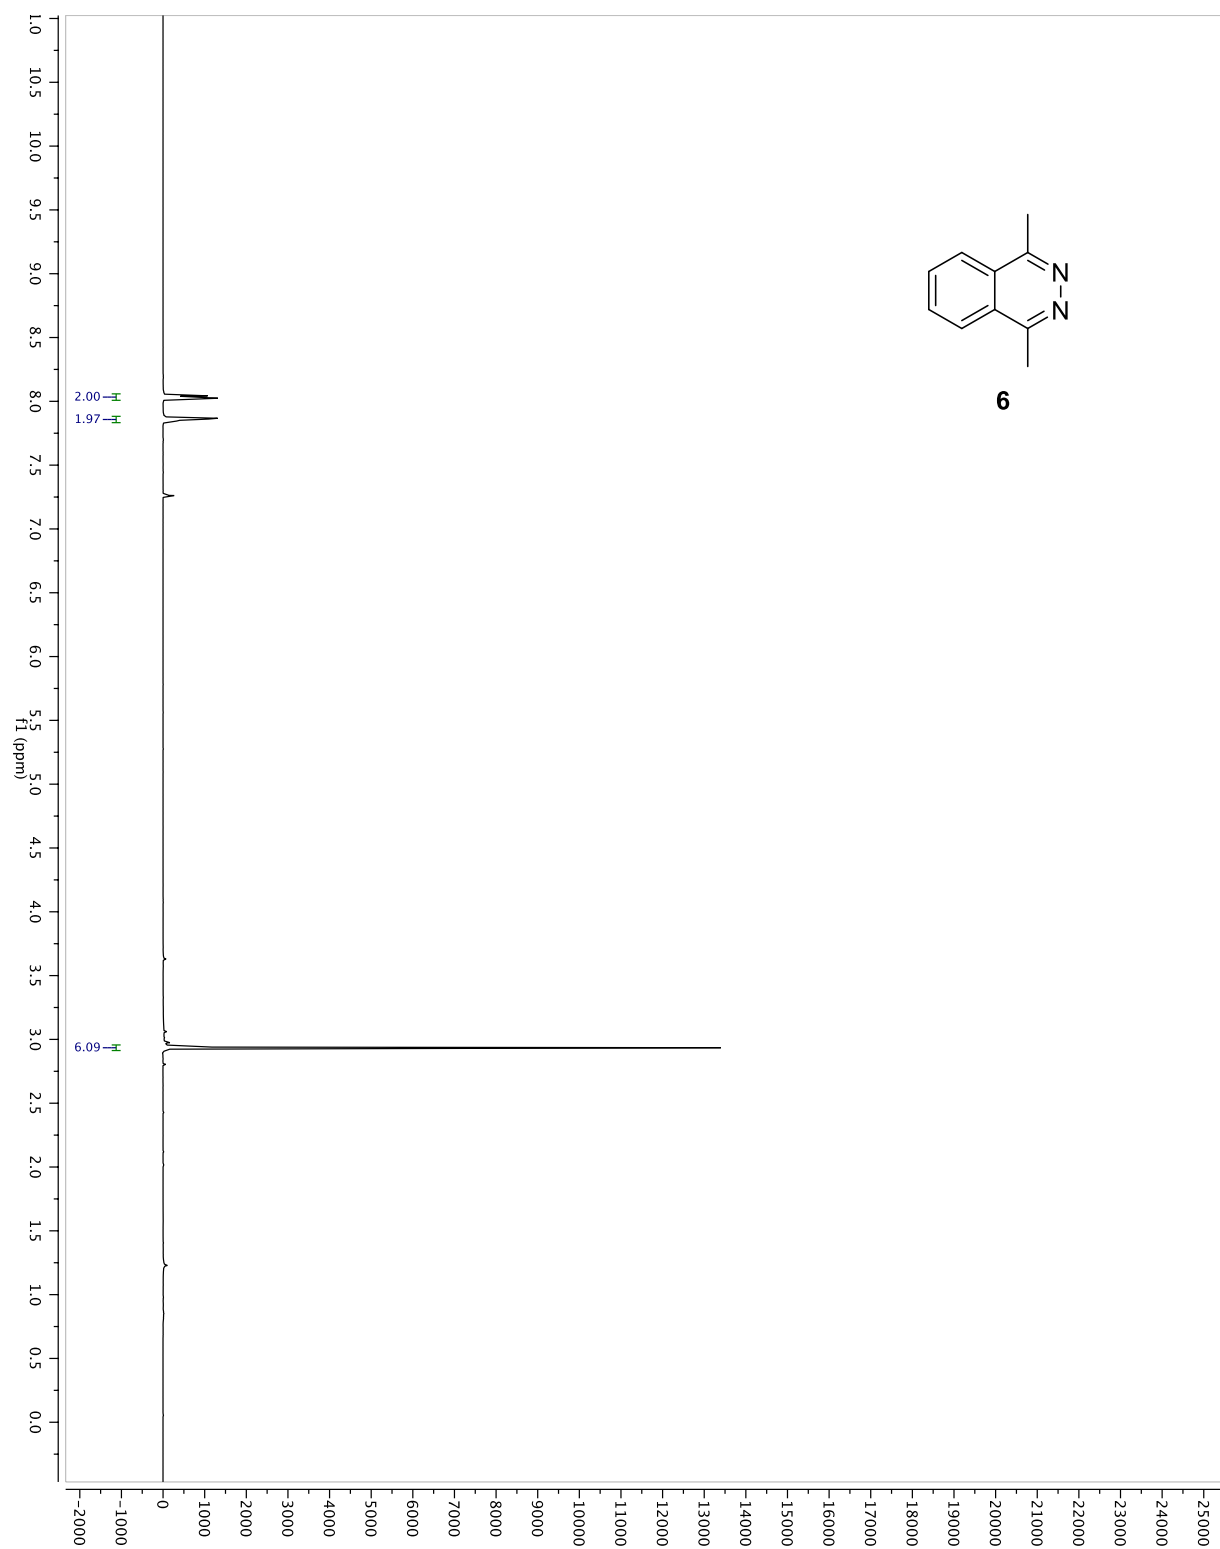

$^{13}\text{C}$  NMR spectrum of **6** in  $\text{CDCl}_3$  (125 MHz).

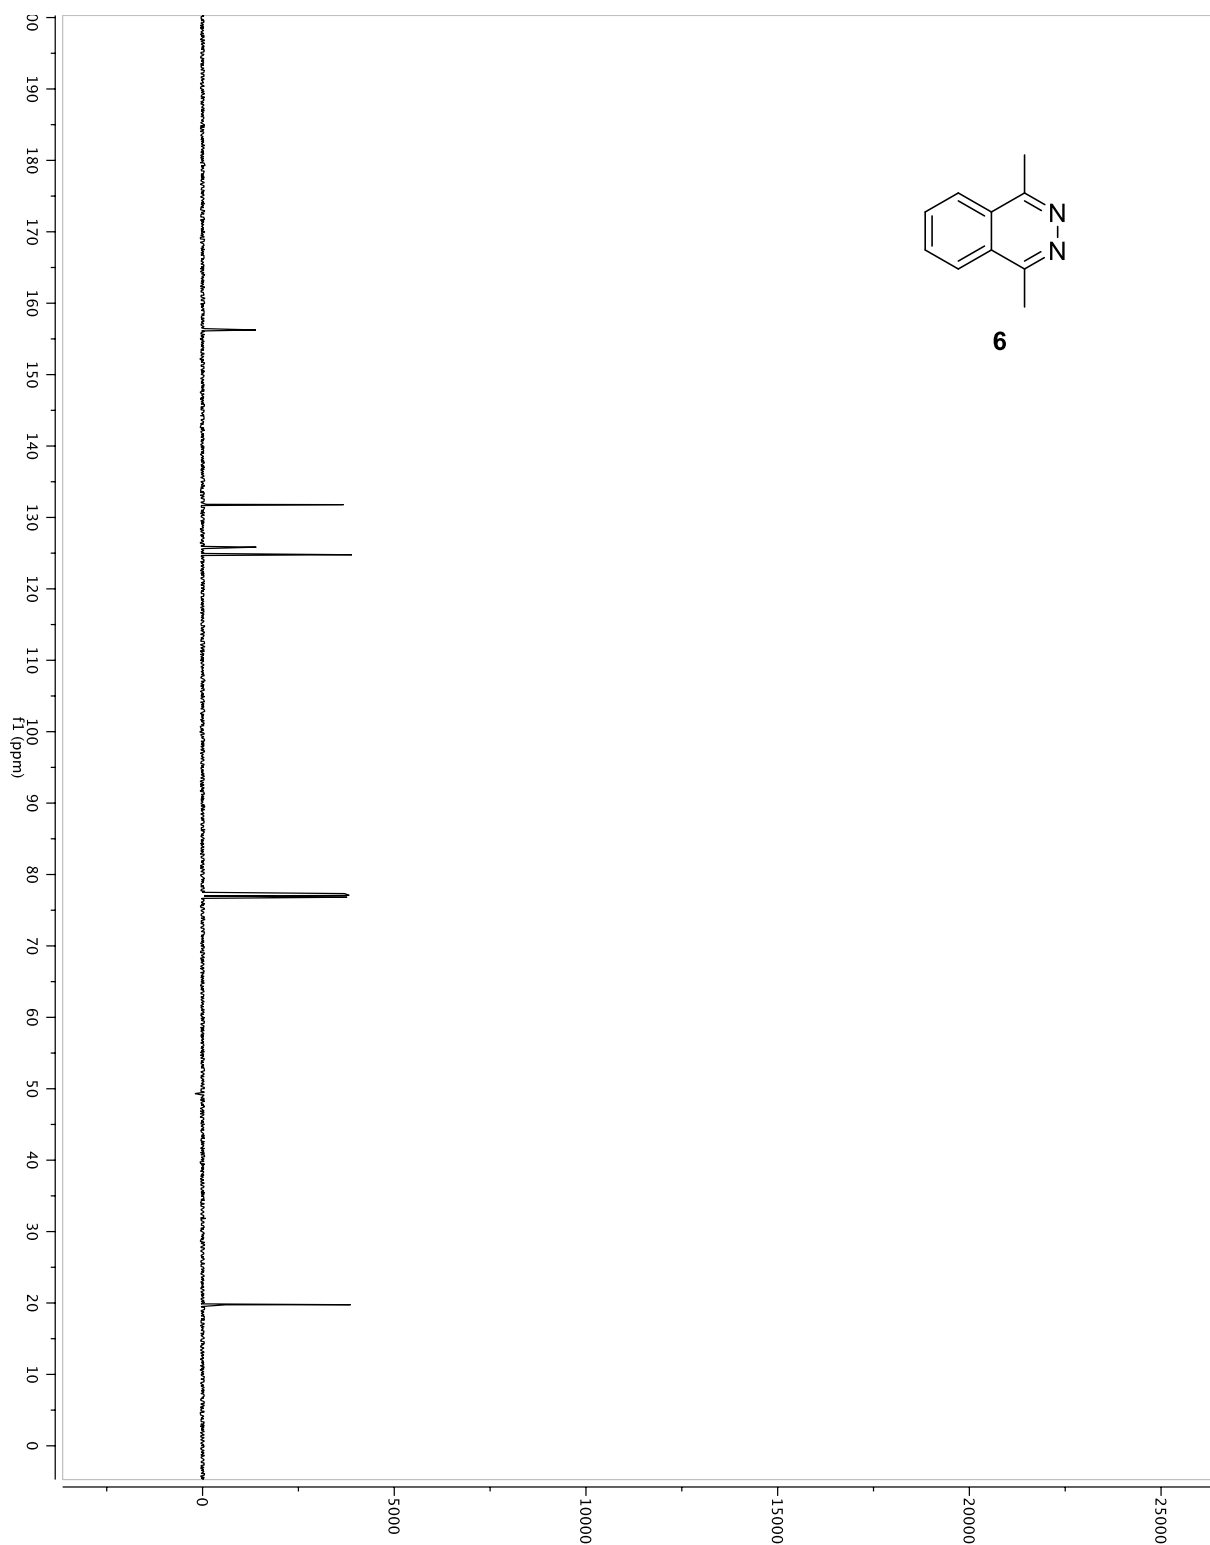

$^1\text{H}$  NMR spectrum of **7** in  $\text{CDCl}_3$  (500 MHz).

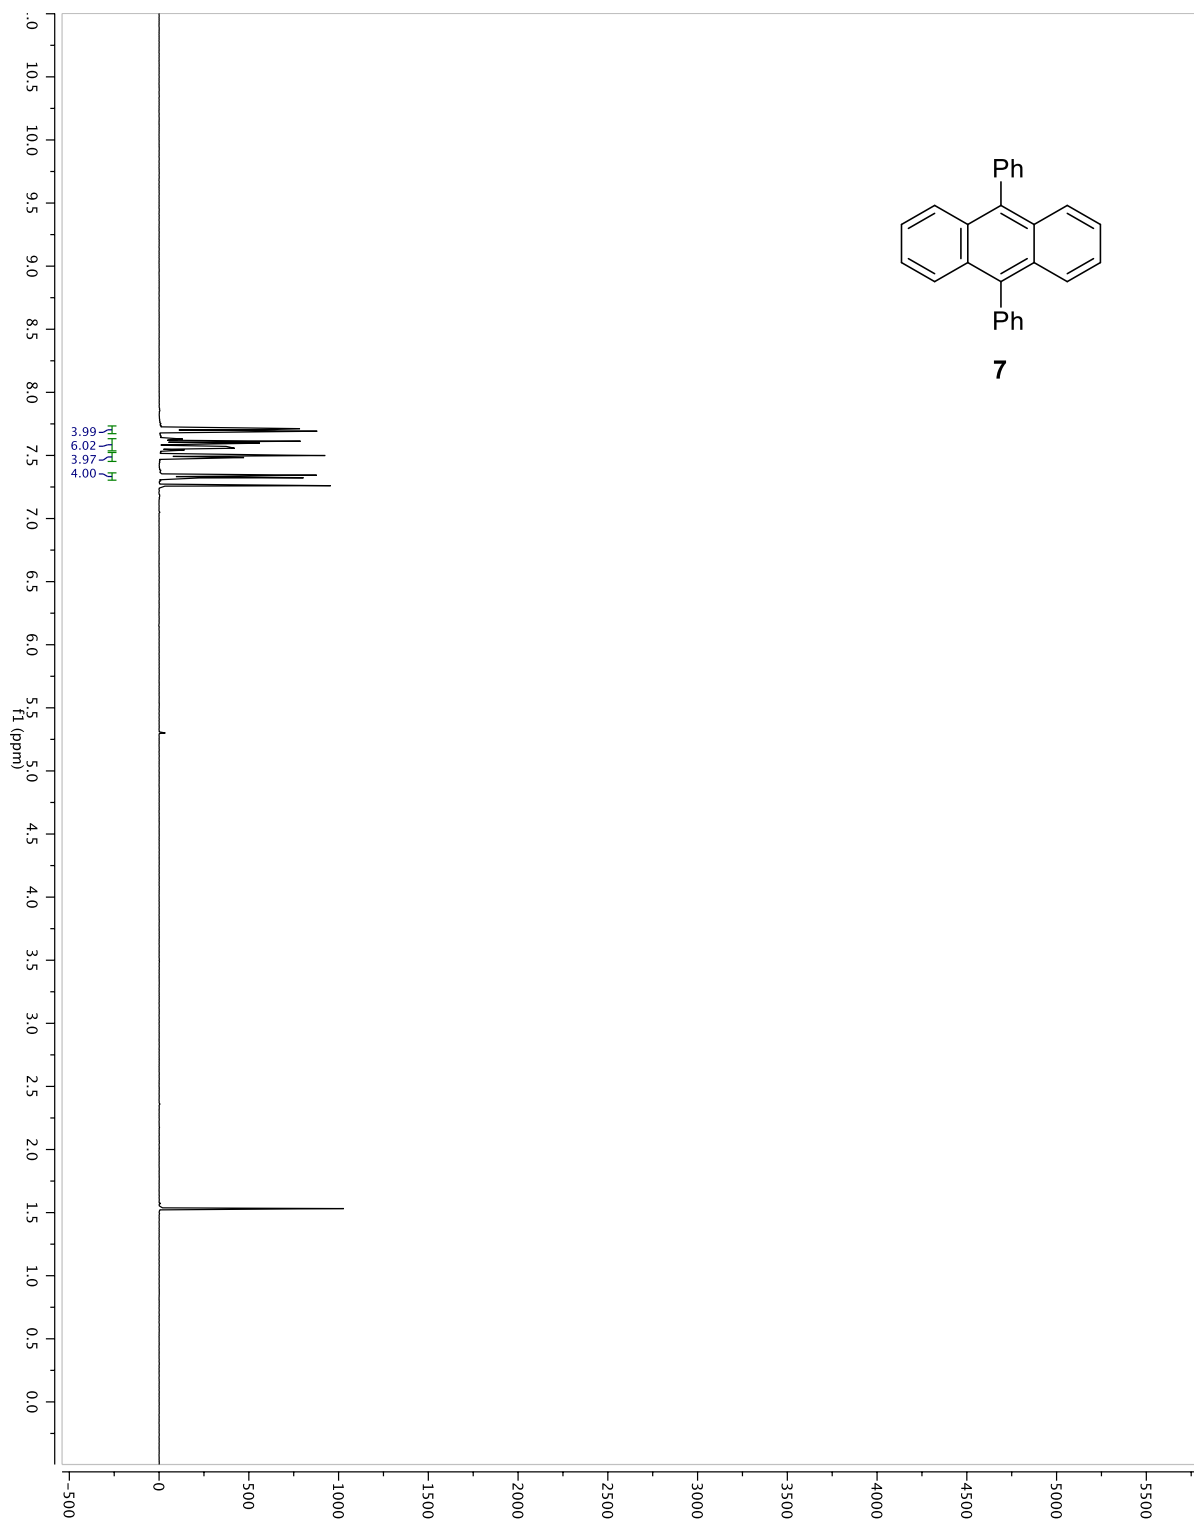

Absorption, emission, and excitation spectra of **5a** at 24 °C in CH<sub>2</sub>Cl<sub>2</sub>.

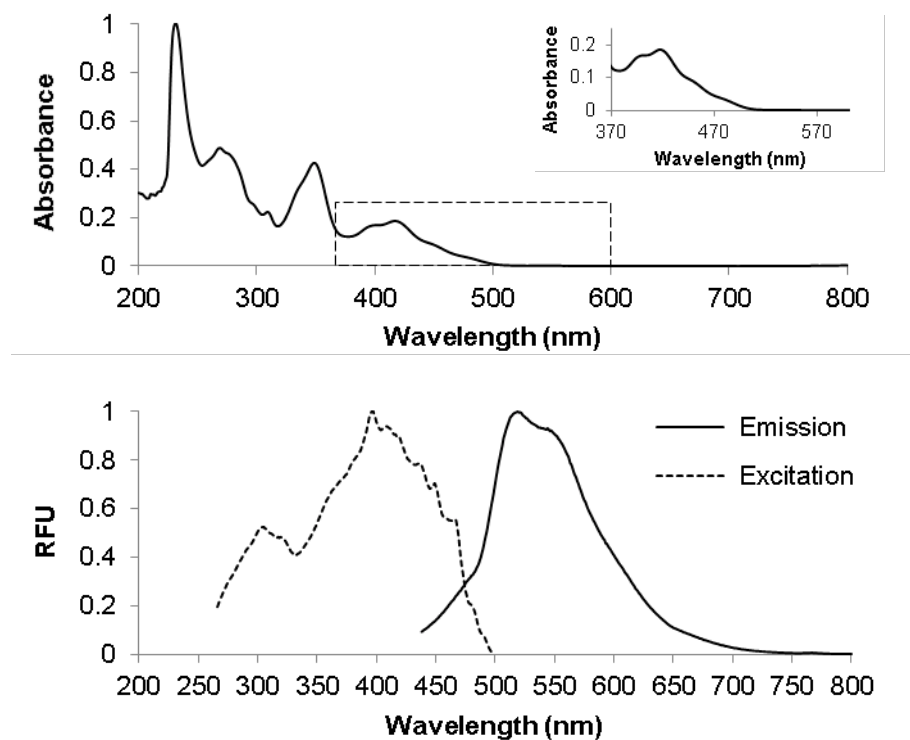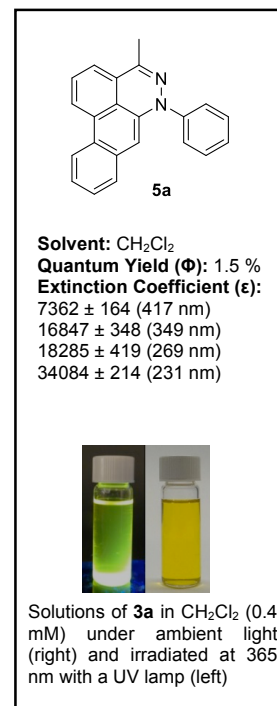

Absorption, emission, and excitation spectra of **5a** at 24 °C in CH<sub>2</sub>Cl<sub>2</sub>/TFA.

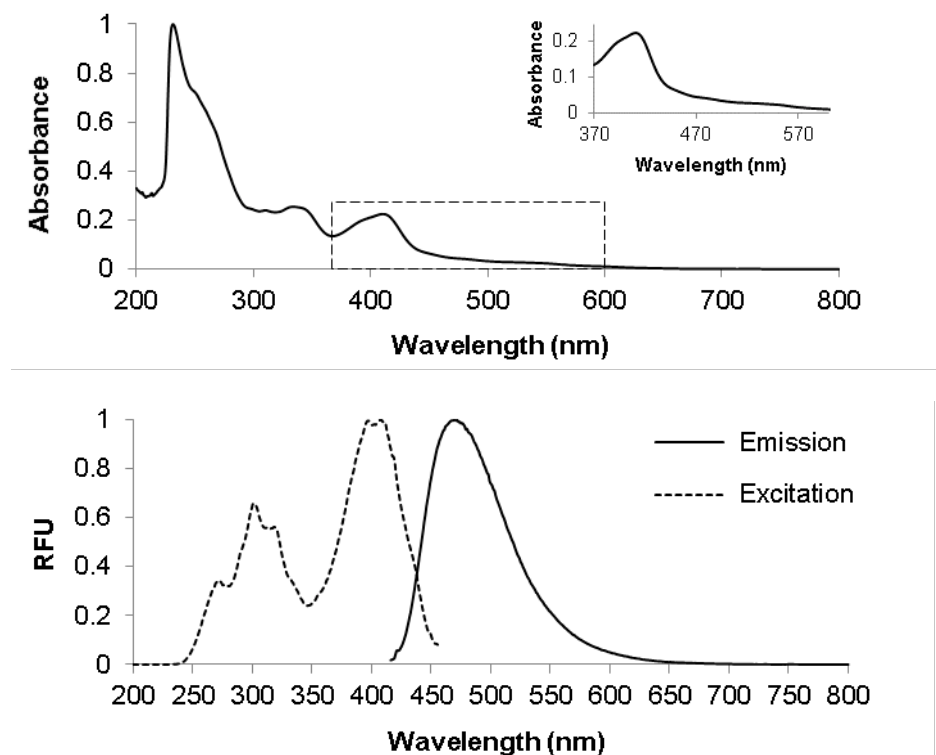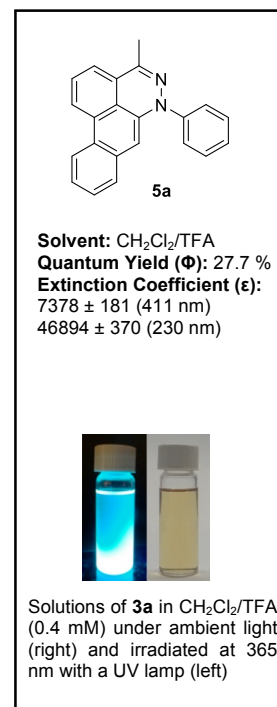

Absorption, emission, and excitation spectra of **5b** at 24 °C in CH<sub>2</sub>Cl<sub>2</sub>.

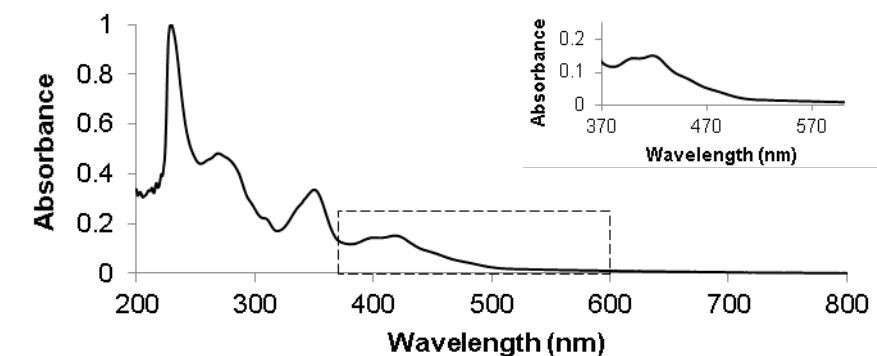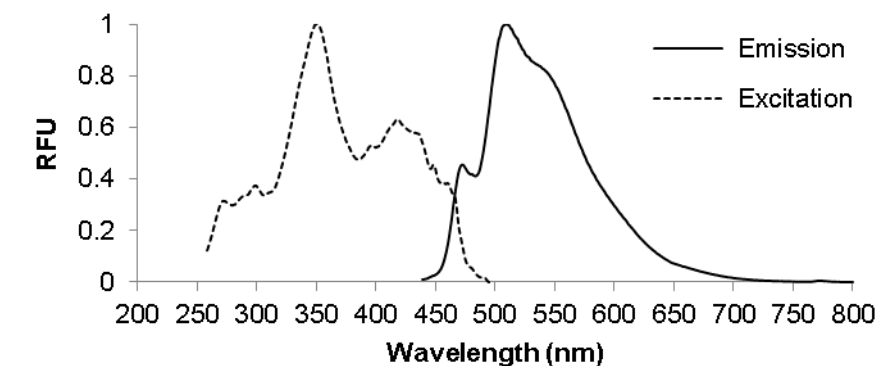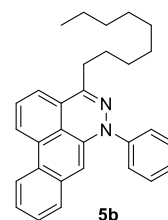

**5b**

Solvent: CH<sub>2</sub>Cl<sub>2</sub>  
Quantum Yield (Φ): 1.2 %  
Extinction Coefficient (ε):  
9205 ± 358 (419 nm)  
15954 ± 109 (350 nm)  
17336 ± 601 (269 nm)  
34072 ± 342 (229 nm)

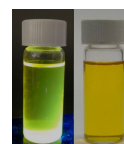

Solutions of **5b** in CH<sub>2</sub>Cl<sub>2</sub> (0.4 mM) under ambient light (right) and irradiated at 365 nm with a UV lamp (left)

Absorption, emission, and excitation spectra of **5b** at 24 °C in CH<sub>2</sub>Cl<sub>2</sub>/TFA.

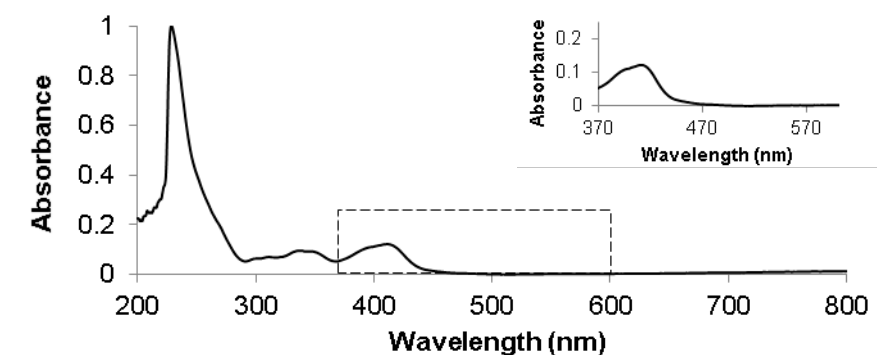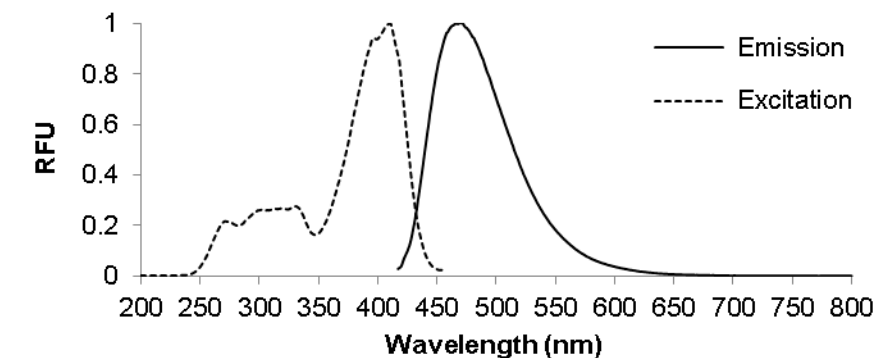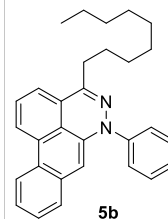

**5b**

Solvent: CH<sub>2</sub>Cl<sub>2</sub>/TFA  
Quantum Yield (Φ): 6.6 %  
Extinction Coefficient (ε):  
7103 ± 16 (419 nm)  
42445 ± 459 (229 nm)

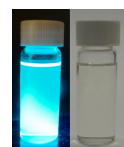

Solutions of **5b** in CH<sub>2</sub>Cl<sub>2</sub>/TFA (0.4 mM) under ambient light (right) and irradiated at 365 nm with a UV lamp (left)



Absorption, emission, and excitation spectra of **5d** at 24 °C in CH<sub>2</sub>Cl<sub>2</sub>.

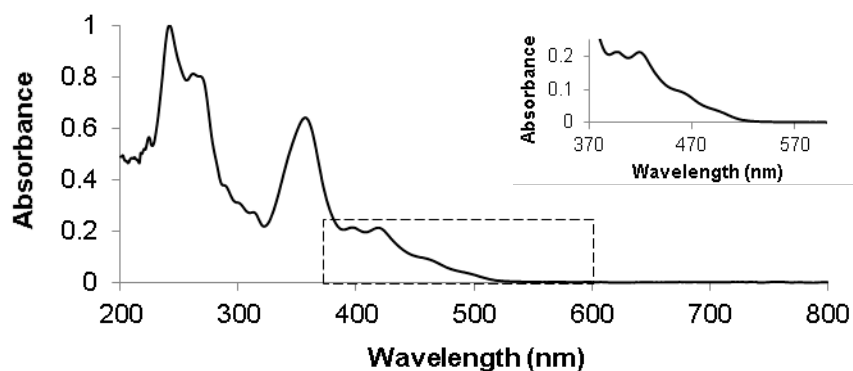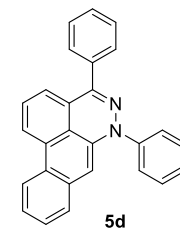

Solvent: CH<sub>2</sub>Cl<sub>2</sub>  
 Quantum Yield (Φ): 0.7 %  
 Extinction Coefficient (ε):  
 4478 ± 140 (419 nm)  
 13669 ± 371 (357 nm)  
 18217 ± 536 (261 nm)  
 25145 ± 719 (242 nm)

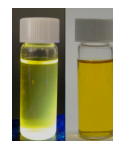

Solutions of **5d** in CH<sub>2</sub>Cl<sub>2</sub> (0.4 mM) under ambient light (right) and irradiated at 365 nm with a UV lamp (left)

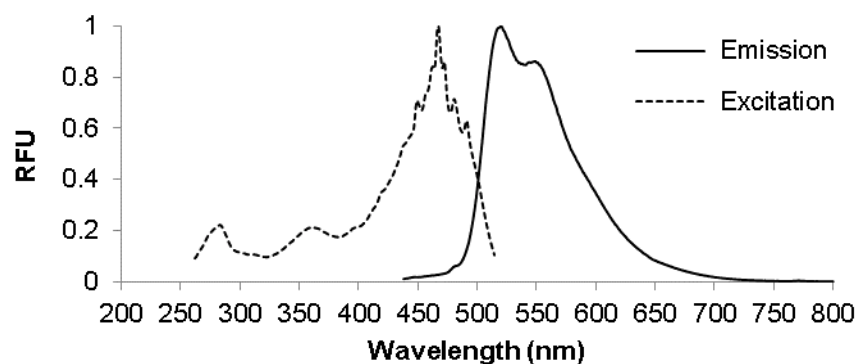

Absorption, emission, and excitation spectra of **5d** at 24 °C in CH<sub>2</sub>Cl<sub>2</sub>/TFA.

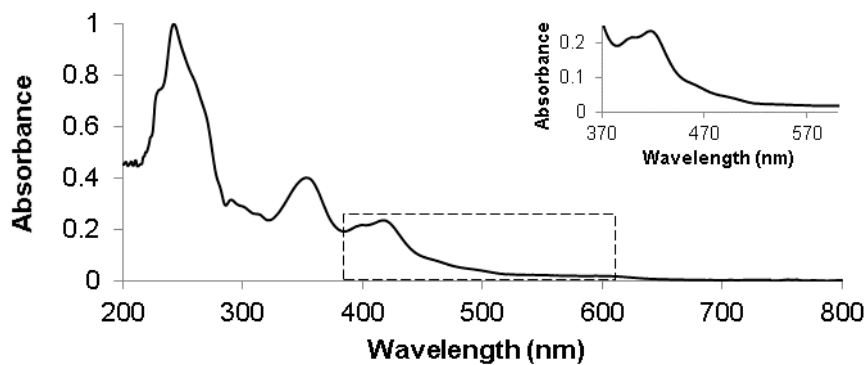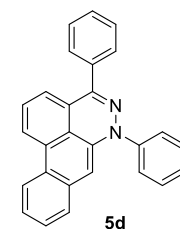

Solvent: CH<sub>2</sub>Cl<sub>2</sub>/TFA  
 Quantum Yield (Φ): 8.1 %  
 Extinction Coefficient (ε):  
 7346 ± 19 (417 nm)  
 25976 ± 371 (404 nm)

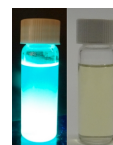

Solutions of **5d** in CH<sub>2</sub>Cl<sub>2</sub>/TFA (0.4 mM) under ambient light (right) and irradiated at 365 nm with a UV lamp (left)

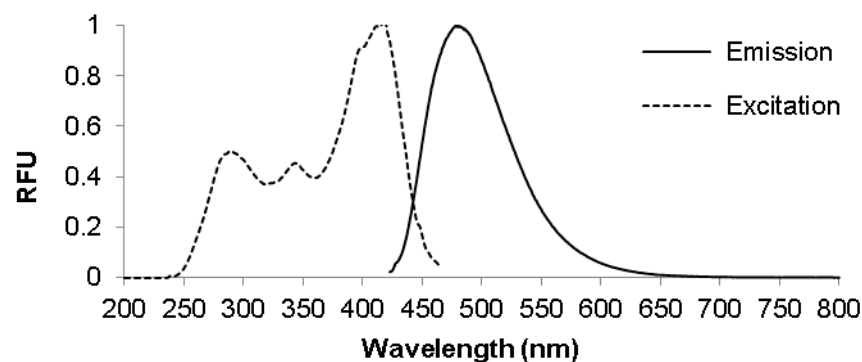

Absorption, emission, and excitation spectra of **5e** at 24 °C in CH<sub>2</sub>Cl<sub>2</sub>.

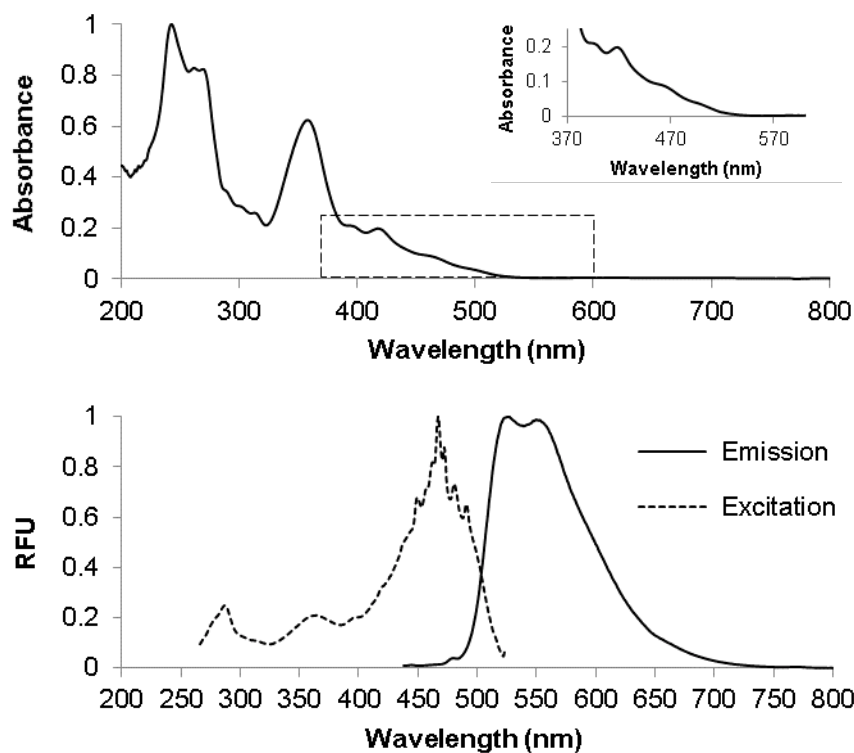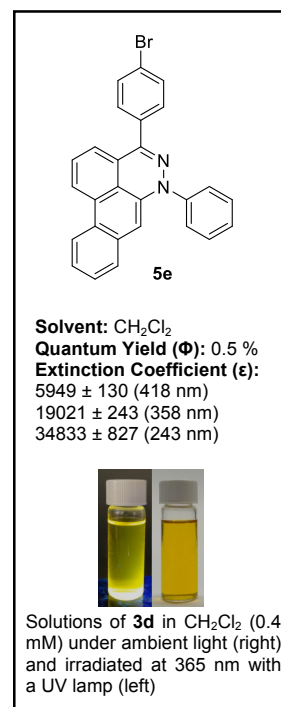

Absorption, emission, and excitation spectra of **5e** at 24 °C in CH<sub>2</sub>Cl<sub>2</sub>/TFA.

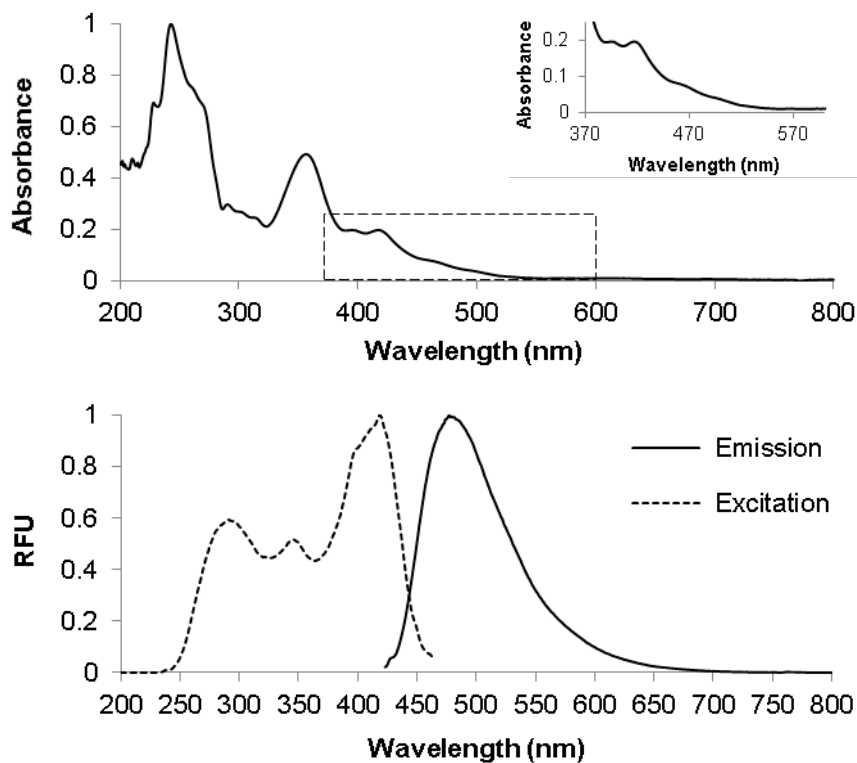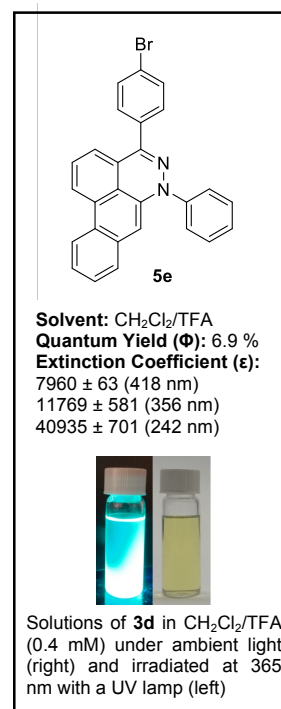

Absorption, emission, and excitation spectra of **5i** at 24 °C in CH<sub>2</sub>Cl<sub>2</sub>.

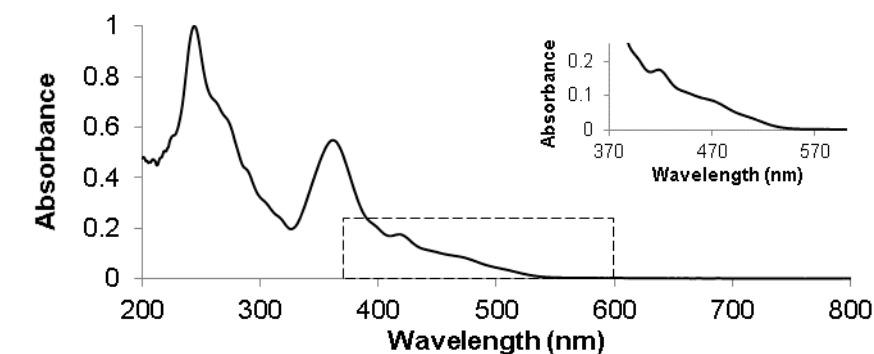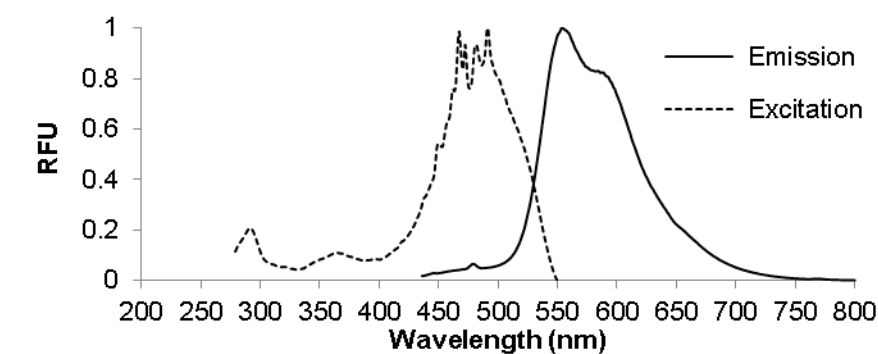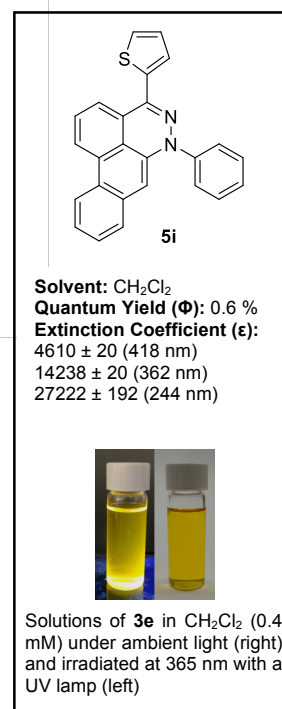

Absorption, emission, and excitation spectra of **5i** at 24 °C in CH<sub>2</sub>Cl<sub>2</sub>/TFA.

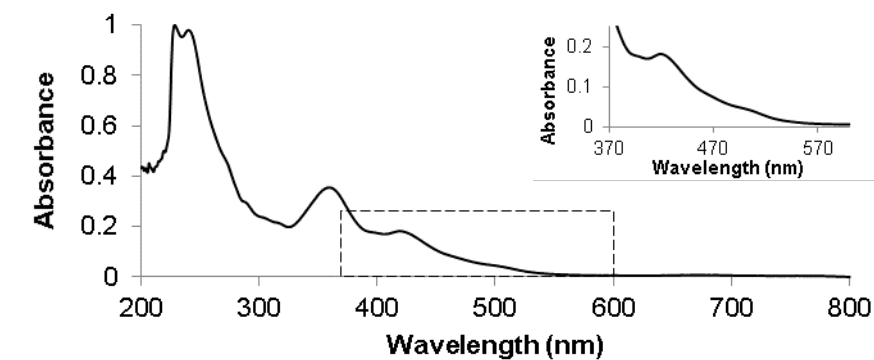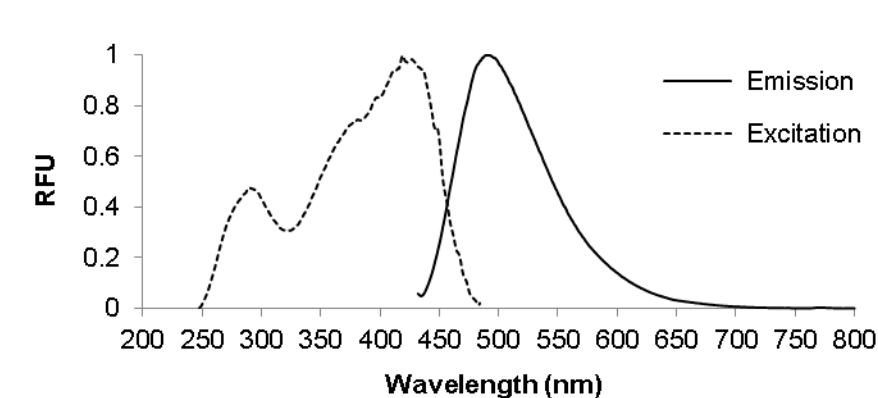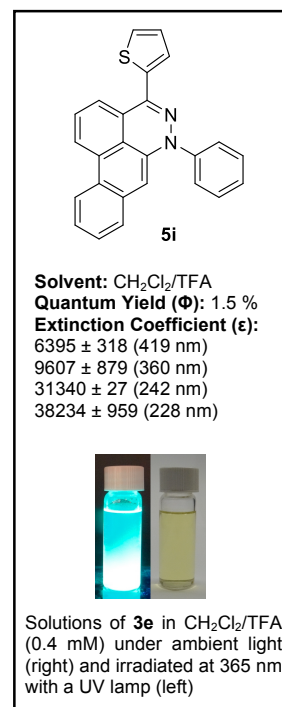

Absorption, emission, and excitation spectra of **5j** at 24 °C in CH<sub>2</sub>Cl<sub>2</sub>.

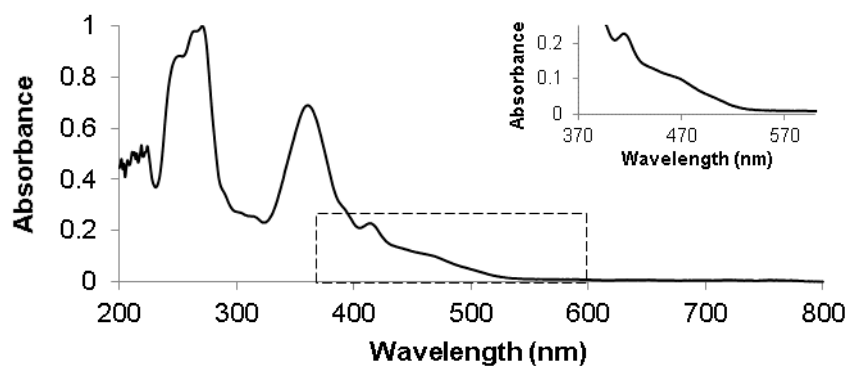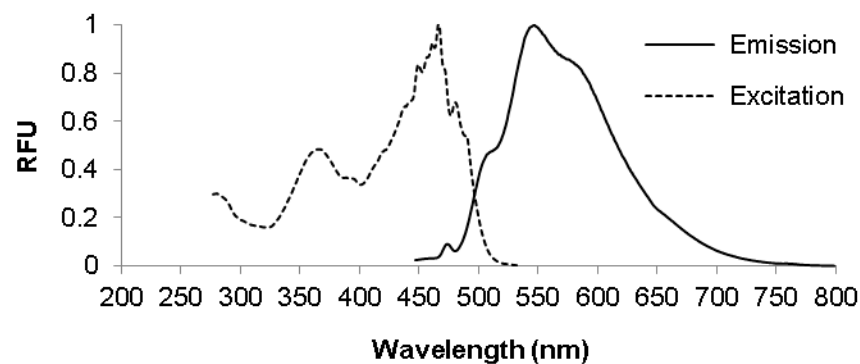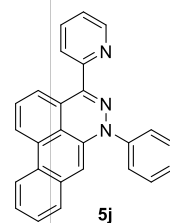

Solvent: CH<sub>2</sub>Cl<sub>2</sub>  
 Quantum Yield (Φ): 0.6 %  
 Extinction Coefficient (ε):  
 1641 ± 46 (413 nm)  
 5306 ± 80 (361 nm)  
 17336 ± 601 (271 nm)

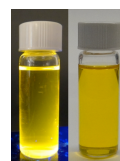

Solutions of **3e** in CH<sub>2</sub>Cl<sub>2</sub> (0.4 mM) under ambient light (right) and irradiated at 365 nm with a UV lamp (left)

Absorption spectrum of **5j** at 24 °C in CH<sub>2</sub>Cl<sub>2</sub>/TFA.

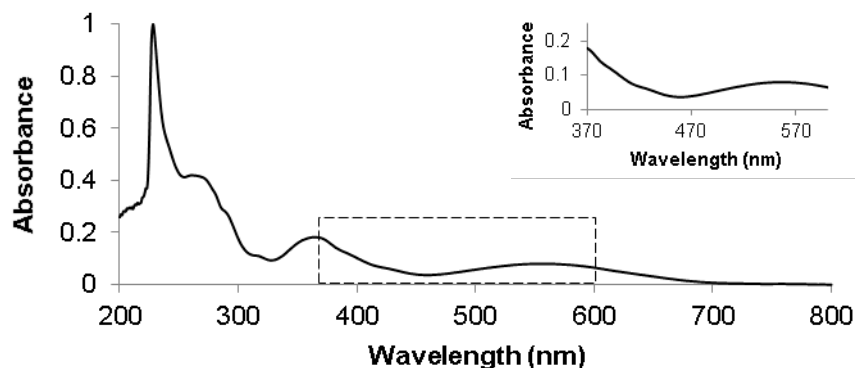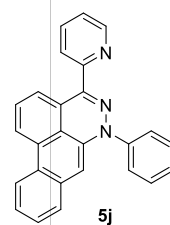

Solvent: CH<sub>2</sub>Cl<sub>2</sub>/TFA  
 Quantum Yield (Φ): 0.0 %  
 Extinction Coefficient (ε):  
 1749 ± 100 (560 nm)  
 3857 ± 118 (365 nm)  
 26933 ± 133 (228 nm)

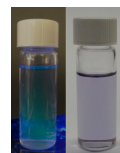

Solutions of **3e** in CH<sub>2</sub>Cl<sub>2</sub>/TFA (0.4 mM) under ambient light (right) and irradiated at 365 nm with a UV lamp (left)

Absorption, emission, and excitation spectra of **5q** at 24 °C in CH<sub>2</sub>Cl<sub>2</sub>.

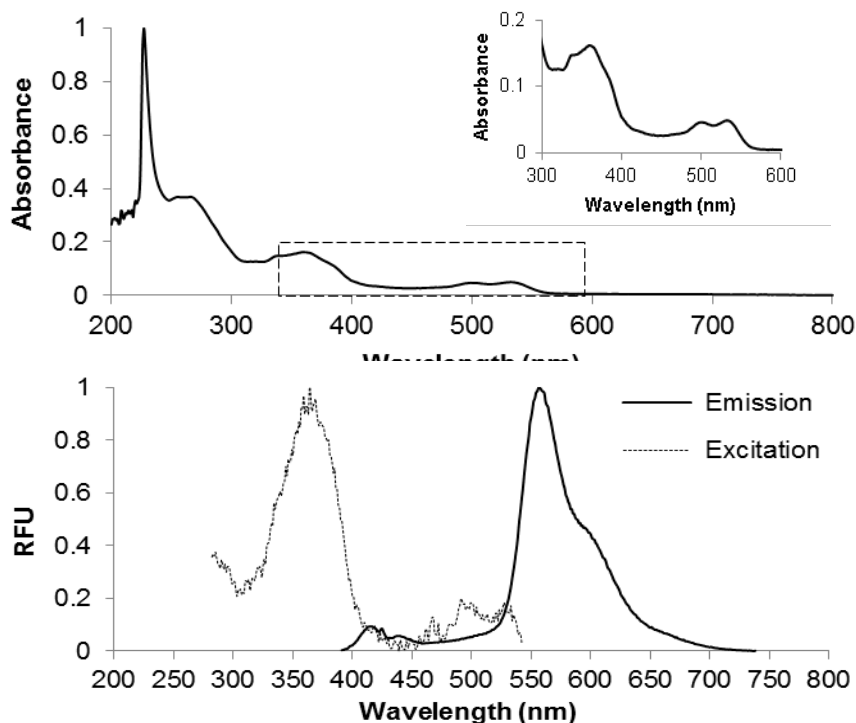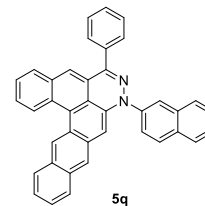

**Solvent:** CH<sub>2</sub>Cl<sub>2</sub>  
**Quantum Yield (Φ):** 6.7 %  
**Extinction Coefficient (ε):**  
 2061 ± 339 (532 nm)  
 1850 ± 355 (501 nm)  
 9469 ± 57 (362 nm)  
 8663 ± 100 (340 nm)  
 23217 ± 698 (266 nm)  
 23141 ± 720 (257 nm)

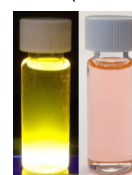

Solutions of **3i** in CH<sub>2</sub>Cl<sub>2</sub> (0.4 mM) under ambient light (right) and irradiated at 365 nm with a UV lamp (left)

Absorption, emission, and excitation spectrum of **5q** at 24 °C in CH<sub>2</sub>Cl<sub>2</sub>/TFA.

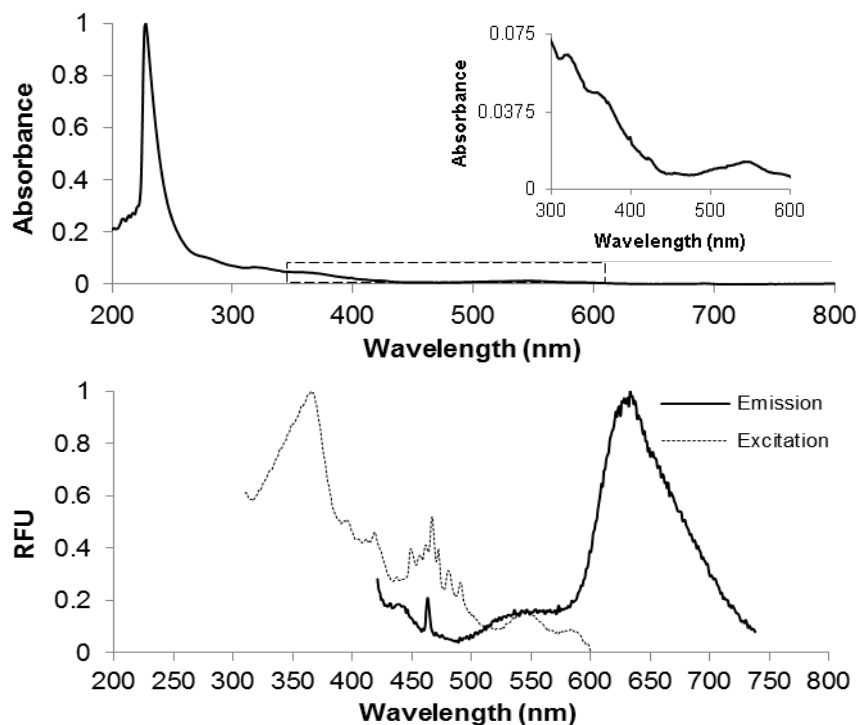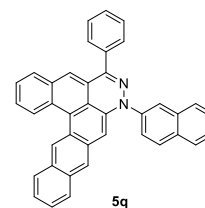

**Solvent:** CH<sub>2</sub>Cl<sub>2</sub>/TFA  
**Quantum Yield (Φ):** 2.0 %  
**Extinction Coefficient (ε):**  
 2290 ± 519 (524 nm)  
 15500 ± 793 (279 nm)

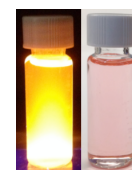

Solutions of **3i** in CH<sub>2</sub>Cl<sub>2</sub>/TFA (0.4 mM) under ambient light (right) and irradiated at 365 nm with a UV lamp (left)

Crystal data and structure refinement for **5a**.

---

|                                 |                                                |
|---------------------------------|------------------------------------------------|
| Empirical formula               | C <sub>22</sub> H <sub>16</sub> N <sub>2</sub> |
| Formula weight                  | 308.37                                         |
| Temperature                     | 100(1) K                                       |
| Wavelength                      | 0.71073 Å                                      |
| Crystal system                  | monoclinic                                     |
| Space group                     | P2 <sub>1</sub> /c                             |
| Cell constants:                 |                                                |
| a                               | 11.9993(9) Å                                   |
| b                               | 4.2453(3) Å                                    |
| c                               | 29.803(2) Å                                    |
| β                               | 100.261(4)°                                    |
| Volume                          | 1493.90(18) Å <sup>3</sup>                     |
| Z                               | 4                                              |
| Density (calculated)            | 1.371 Mg/m <sup>3</sup>                        |
| Absorption coefficient          | 0.081 mm <sup>-1</sup>                         |
| F(000)                          | 648                                            |
| Crystal size                    | 0.48 x 0.12 x 0.04 mm <sup>3</sup>             |
| Theta range for data collection | 1.39 to 25.38°                                 |
| Index ranges                    | -14 ≤ h ≤ 14, -5 ≤ k ≤ 5, -35 ≤ l ≤ 35         |
| Reflections collected           | 32407                                          |
| Independent reflections         | 2740 [R(int) = 0.0637]                         |
| Completeness to theta = 25.38°  | 99.9 %                                         |
| Absorption correction           | Semi-empirical from equivalents                |
| Max. and min. transmission      | 0.7452 and 0.4717                              |
| Refinement method               | Full-matrix least-squares on F <sup>2</sup>    |
| Data / restraints / parameters  | 2740 / 0 / 219                                 |

|                                      |                                    |
|--------------------------------------|------------------------------------|
| Goodness-of-fit on $F^2$             | 1.104                              |
| Final R indices [ $I > 2\sigma(I)$ ] | R1 = 0.0541, wR2 = 0.1464          |
| R indices (all data)                 | R1 = 0.0664, wR2 = 0.1579          |
| Largest diff. peak and hole          | 0.308 and -0.270 e.Å <sup>-3</sup> |

---
